# Supplementary material for: Predicting the impact of Lynch syndrome-causing missense mutations from structural calculations
Source: PLoS Genet. 2017 Apr 19;13(4):e1006739. doi: 10.1371/journal.pgen.1006739 (PMC5415204; doi:10.1371/journal.pgen.1006739)
Supplement: S1 File — (XLSX) [file pgen.1006739.s007.xlsx]

## Sheet: Sheet1
Chain ID	A	A	A	A	A	A	A	A	A	A	A	A	A	A	A	A	A	A	A	A	A	A	A	A	A	A	A	A	A	A	A	A	A	A	A	A	A	A	A	A	A	A	A	A	A	A	A	A	A
Residue #	1	2	3	4	5	6	7	8	9	10	11	12	13	14	15	16	17	18	19	20	21	22	23	24	25	26	27	28	29	30	31	32	33	34	35	36	37	38	39	40	41	42	43	44	45	46	47	48	49
WT Residue type	M	A	V	Q	P	K	E	T	L	Q	L	E	S	A	A	E	V	G	F	V	R	F	F	Q	G	M	P	E	K	P	T	T	T	V	R	L	F	D	R	G	D	F	Y	T	A	H	G	E	D
G	0.508	-1.4	-0.012	1.18	3.14	0.266	1.676	1.21	3.412	1	2.26	0.532	0.432	0.43	1.298	2.022	1.508	0	6.174	3.424	1.246	4.15	3.814	1.278	0	4.128	1.518	0.476	1.466	1.684	-0.136	0.38	2.194	5.376	5.42	6.316	6.69	2.49	4.058	0	0.03	4.196	4.66	3.448	1.74	0.79	0	1.428	2.328
A	0.438	0	-0.398	0.5	2.02	0.476	0.496	0.57	2.474	0.63	1.7	0.99	-0.18	0	0	0.602	0.594	-0.91	4.824	1.688	0.45	2.934	2.084	0.75	0.73	3.582	1.262	0.196	0.906	1.078	-0.318	-0.166	0.774	3.258	3.6	4.408	5.238	1.43	2.978	1.72	-0.33	3.37	3.824	1.892	0	-1.836	4.2	1.132	1.204
V	0.836	1.028	0.002	0.472	4.236	0.668	-0.808	-0.028	1.702	0.648	0.566	1.422	0.028	0.018	-0.272	0.406	0.028	0.108	4.646	0.002	0.63	2.748	1.954	0.698	1.54	1.752	1.446	0.414	0.424	2.038	-0.018	0.356	-0.038	0.002	1.944	1.664	4.596	0.524	2.37	3.966	0.332	2.194	1.298	1.032	-0.206	-1.322	7.156	1.34	0.822
L	0.396	-0.556	-0.726	-0.63	3.298	0.462	-0.744	-0.312	0.004	0.516	0.026	0.864	-1.08	-0.242	-0.204	-0.81	-0.682	-1.326	3.2	0.15	-0.438	1.148	0.618	-0.246	0.06	0.79	1.37	0.224	-0.9	1.446	-0.464	-1.28	-1.632	-0.284	0.836	0.004	2.902	0.418	1.108	2.268	-0.172	3.13	0.852	2.772	1.91	-2.254	4.188	1.082	1.69
I	0.396	0.936	-0.192	0.068	2.184	0.622	0.646	-0.328	0.818	0.488	0.464	1.196	-0.828	-0.37	-0.7	-0.55	-0.61	-0.186	3.928	0.166	0.142	2.296	1.568	0.128	0.598	1.27	1.46	0.446	-0.42	1.724	-0.332	-0.204	0.602	0.374	2.558	0.192	5.006	0.096	2.25	4.012	-0.088	1.592	1.238	-0.302	0.068	3.37	8.272	0.956	0.43
M	0.036	-0.83	-0.51	-1.316	2.582	0.498	-0.676	0.09	0.092	0.388	-0.524	0.412	-1.224	-0.208	-1.544	-0.57	-0.728	-1.316	1.738	0.286	-0.696	1.108	0.276	-0.676	0.276	0.008	1.03	0.196	-0.444	1.342	-0.334	-1.044	0.392	1.94	0.66	-0.356	0.908	1.282	0.81	2.252	-0.314	0.934	0.472	0.544	2.642	-1.442	4.586	0.484	1.816
F	0.45	0.118	-0.676	-1.39	15.118	0.432	-1.168	0.4	0.838	0.26	0.174	0.614	-1.064	-0.08	-0.908	-0.188	-0.43	-1.114	0.01	0.298	-0.314	0.004	0.016	-0.484	-0.39	3.106	1.042	-0.166	0.81	1.716	-0.576	-1.39	6.336	7.436	3.79	3.64	0.012	1.262	2.446	1.884	0.134	0.014	-0.45	10.7	17.114	0.372	4.18	0.758	1.49
W	0.11	0.304	-0.848	-1.708	16.166	0.62	-1.68	0.74	1.926	0.394	-0.628	1.12	-0.84	0.19	0.062	2.234	0.338	-1.104	6.472	0.984	-1.048	0.83	0.332	-0.29	0.166	4.642	1.06	-0.448	0.014	1.564	-0.676	-0.93	6.41	9.834	2.148	3.692	2.95	1.47	3.8	1.932	0.104	1.12	0.5	14.158	29.23	8.46	5.004	0.144	3.128
P	1.014	3.308	-1.404	-0.69	0.004	-0.614	-0.15	1.024	1.51	1.224	1.304	-0.654	-1.19	0.012	-1.002	7.41	4.394	3.116	6.366	4.122	1.622	6.024	8.588	3.252	3.828	5.816	0.002	-0.87	1.324	0	-1.53	-0.264	6.284	6.564	3.628	7.534	7.528	2.782	5.188	6.476	-1.434	4.552	5	7.496	1.122	-0.49	10.358	-0.646	0.916
S	0.518	0.924	-0.1	0.68	2.538	0.43	1.65	0.83	3.258	0.39	1.678	-0.216	0	0.56	1.3	2.144	0.758	0.056	5.194	2.652	0.59	4.054	3.036	0.87	0.338	3.756	1.444	0.376	1.742	0.422	-0.264	-0.326	1.154	4.436	3.406	5.366	6.544	2.314	3.686	2.07	-0.074	3.93	4.474	1.596	0.95	-0.486	3.406	1.444	1.796
T	0.698	0.522	-0.128	0.52	3.208	0.494	1.076	0	2.428	0.626	0.946	0.726	0.066	0.216	0.744	0.248	0.576	0.96	4.274	1.602	0.224	3.338	2.25	1.188	0.642	2.268	1.476	0.404	1.45	1.254	0.002	0.016	0.044	2.486	1.702	3.526	6.642	1.406	3.832	3.15	0.23	3.486	3.01	0.064	0.918	0.222	5.03	1.44	0.828
C	0.288	-0.088	-0.228	0.31	2.416	0.584	0.764	0.29	2.078	0.328	1.472	1.208	0.206	0.32	0.522	1.17	0.968	-0.176	5.066	1.84	0.796	3.5	2.376	1.18	0.274	2.634	1.418	0.502	0.704	1.872	-0.062	-0.05	0.34	2.544	3.184	3.77	4.374	1.674	3.412	1.912	-0.118	3.02	2.948	1.188	0.664	0.352	4.648	1.49	2.212
Y	0.508	0.226	-0.626	-0.886	18.468	0.478	-1.116	0.474	2.002	0.378	0.332	1.106	-0.778	0.214	-0.24	1.784	-0.25	-1.444	4.714	0.628	-0.242	0.704	0.368	-0.15	-0.21	3.93	1.214	0.084	0.366	1.724	-0.544	-1.008	7.47	9.804	4.074	5.368	1.776	1.402	3.176	2.122	0.134	0.762	-0.126	11.728	17.788	0.734	4.5	0.572	4.764
N	0.152	-0.092	-0.438	0.258	5.57	0.656	1.272	-0.148	2.872	-0.044	1.78	0.012	0.302	0.548	1.104	1.024	0.692	-0.636	4.414	1.906	0.592	3.13	3.166	1.11	-0.502	2.662	1.526	0.422	1.738	1.59	-0.154	-0.216	1.808	3.528	4.124	4.57	4.966	0.97	3.332	2.222	-0.676	2.974	3.272	3.576	4.09	-1.022	4.584	1.24	1.316
Q	0.076	0.364	-0.474	0	3.582	0.106	0.678	0.054	2.848	0.014	1.522	0.96	-0.658	-0.32	0.67	0.614	0.076	-0.786	5.228	1.784	0.21	2.48	1.858	0	0.14	2.91	1.516	0.116	1.224	1.288	-0.246	-0.19	1.244	4.69	2.298	2.986	4.914	1.976	2.728	1.716	-0.276	4.004	2.564	4.242	5.792	-0.2	4.964	0.784	2.21
D	0.798	-0.326	-0.482	0.822	5.894	0.53	1.228	0.648	1.894	0.296	1.904	-2.284	-0.176	-0.69	1.086	0.526	1.224	-0.304	4.876	3.282	0.812	4.036	3.068	1.484	0.932	3.716	1.394	0.064	2.444	0.738	-0.574	-0.924	2.494	5.398	6.748	5.402	4.908	0.006	4.054	2.254	0	5.766	4.802	4.426	4.034	-0.812	2.676	0.208	0.02
E	0.698	0.406	-1.082	0.048	4.204	0.482	0.014	0.524	1.974	0.316	1.424	0	-0.804	-0.948	0.412	0.014	0.192	-0.726	4.562	2.688	0.326	3.064	2.86	0.778	0.842	2.804	1.174	0.048	1.818	0.624	-1.004	-0.548	2.514	5.714	4.504	4.148	4.664	1.272	3.376	2.168	-0.372	5.078	4.218	3.542	6.042	-0.89	5.262	0.064	0.04
K	0.338	-0.544	-0.556	-0.228	5.432	0.062	0.242	0.262	3.04	0.328	1.518	1.224	-0.392	-0.21	0.87	1.19	-0.046	-1.094	6.972	1.806	-0.218	2.086	2.278	0.042	0.268	1.75	1.426	0.114	0.006	1.778	-0.418	-0.686	1.684	7.362	2.546	4.254	5.67	1.59	2.412	1.842	-0.406	3.7	2.098	4.824	7.038	0.688	4.652	1.326	4.098
R	0.096	-0.006	-0.324	-0.228	5.202	0.148	0.718	0.476	3.18	-0.034	1.794	1.694	-0.162	0.104	1.74	1.458	0.164	-0.936	9.102	1.7	0.002	2.386	2.394	0.256	0.094	3.434	1.256	0.026	0.092	1.88	-0.236	-0.38	2.006	6.474	0	6.88	7.372	2.34	0	1.818	-0.36	4.086	2.578	5.198	14.366	8.002	4.88	1.524	5.014
H	0.206	-0.256	-0.186	-0.182	10.374	0.728	0.844	0.216	2.676	0.86	1.488	1.324	-0.578	0.49	0.772	1.906	0.526	-0.044	3.612	2.264	0.42	2.796	2.512	0.662	-0.596	4.502	1.57	0.392	2.128	1.996	-0.09	-0.018	5.876	4.788	3.484	2.774	3.46	1.484	3.83	2.082	-0.152	2.186	2.898	11.294	16.316	-2.382	5.512	1.636	6.204
[truncated: 782 more columns]
