# Supplementary material for: Predicting the impact of Lynch syndrome-causing missense mutations from structural calculations
Source: PLoS Genet. 2017 Apr 19;13(4):e1006739. doi: 10.1371/journal.pgen.1006739 (PMC5415204; doi:10.1371/journal.pgen.1006739)
Supplement: S3 File — (XLSX) [file pgen.1006739.s009.xlsx]

## Sheet: supplementary_table_S1
wt	pos	AA	FoldX ΔΔG	PROVEAN	SIFT	PolyPhen2	Rosetta ΔΔG	Biological stability	Found in patients	Covariation	Covar. 1D	msa prob	CADD Raw	CADD PHRED
R	39	E	3.4	-4.13	0.002	0.989	-0.544	Short half-life	No	9.80782	4.70182	0.000276625	6.71517	32
A	54	Y	15	-4.96	0	1	30	Short half-life	No	9.2693	6.64911	0.000276625	7.52442	34
L	75	K	3	-4.13	0.001	0.913	8.084	Short half-life	No	5.94299	2.08051	0.00885201	5.5207	26.3
Y	98	C	2.5	-6.22	0.013	1	2.926	Medium half-life	Yes	6.60012	3.37342	0.0138313	4.5197	24.3
L	135	Y	3.4	-4.09	0	0.906	12.987	Wild type-like half-life	No	6.48268	2.80343	0.00885201	5.32869	25.8
D	180	F	15	-8.08	0	0.998	12.236	Short half-life	Yes	7.11151	3.2567	0.0121715	6.30163	29.1
L	187	P	8.8	-5.79	0.003	1	30	Short half-life	Yes	8.34068	7.70639	0	5.889	27.4
C	199	R	5.5	-10.32	0	1	10.429	Short half-life	Yes	10.0398	5.12111	0.000276625	5.58031	26.5
K	228	E	0.2	-3.02	0.04	0.997	-2.333	Wild type-like half-life	No	5.64268	0.383438	0.0514523	5.03485	25.2
M	253	Y	-0.1	-1.65	0.148	0.027	0.209	Wild type-like half-life	No	2.38123	-1.01825	0.006639	2.22904	17.7
A	266	W	15	-6.1	0	1	30	Short half-life	No	11.006	7.18766	0	7.38243	34
D	283	K	0.5	-1.66	0.317	0.296	0.318	Short half-life	No	3.69787	-0.390803	0.0470263	4.63309	24.5
C	333	Y	15	-10.44	0.001	1	30	Short half-life	Yes	8.55779	6.32181	0.000276625	6.58023	31
A	399	K	9.4	-4.43	0.001	0.952	21.427	Medium half-life	No	5.17558	3.40283	0.0127248	7.16824	34
D	459	I	2.4	-8.57	0	0.997	30	Medium half-life	No	6.61904	1.23069	0.0755187	6.62106	32
E	561	V	0	-5.2	0.059	0.966	1.074	Wild type-like half-life	No	5.44222	2.5189	0.0118949	5.54892	26.4
D	603	N	1	-4.77	0.003	0.987	1.732	Short half-life	Yes	8.38947	8.19894	0	6.86706	33
P	622	T	3.7	-7.79	0	1	7.141	Medium half-life	Yes	9.02773	8.19545	0	6.01827	27.9
A	649	F	-0.3	-3.88	0.035	0.99	3.81	Medium half-life	No	6.3453	1.35105	0.0146611	5.68394	26.8
G	669	D	12.7	-6.77	0	1	28.768	Short half-life	Yes	10.8672	8.21597	0	6.74444	32
G	683	R	9.8	-7.73	0	1	30	Short half-life	Yes	10.2936	5.67638	0.000276625	6.86111	33
P	696	F	13.8	-10.59	0	1	15.34	Short half-life	No	7.35255	6.2236	0.00165975	7.11404	34
S	743	P	7.5	-4.67	0	1	30	Short half-life	No	9.61526	8.1622	0	6.61158	32
L	851	P	5.1	-6.76	0	1	30	Medium half-life	No	9.19562	6.44779	0.000829876	5.47202	26.2
