# Supplementary material for: Predicting the impact of Lynch syndrome-causing missense mutations from structural calculations
Source: PLoS Genet. 2017 Apr 19;13(4):e1006739. doi: 10.1371/journal.pgen.1006739 (PMC5415204; doi:10.1371/journal.pgen.1006739)
Supplement: S4 File — (XLSX) [file pgen.1006739.s010.xlsx]

## Sheet: Workbook details
Sheet	Description
proteingroups.txt	Unmanipulated MaxQuant output file
Accepted	Proteins whose data is defined as good enough to be carried forward for analysis
Rejected	Proteins whose data is NOT defined as good enough to be carried forward for analysis (with reason for rejection)
Normalization	Details of normalization coefficients to allow for loading variation
Shortlist 103_summary	Streamilined version of the data for the 103 proteins defined by Perseus as significantly changing in at least one of the comparisons wt vs vect, mut vs vect, mut vs vect.

## Sheet: proteinGroups.txt
Protein IDs	Majority protein IDs	Peptide counts (all)	Peptide counts (razor+unique)	Peptide counts (unique)	Protein names	Gene names	Fasta headers	Number of proteins	Peptides	Razor + unique peptides	Unique peptides	Peptides Mut_1	Peptides Mut_2	Peptides Mut_3	Peptides Mut_4	Peptides Vector_1	Peptides Vector_2	Peptides Vector_3	Peptides Vector_4	Peptides WT_1	Peptides WT_2	Peptides WT_3	Peptides WT_4	Razor + unique peptides Mut_1	Razor + unique peptides Mut_2	Razor + unique peptides Mut_3	Razor + unique peptides Mut_4	Razor + unique peptides Vector_1	Razor + unique peptides Vector_2	Razor + unique peptides Vector_3	Razor + unique peptides Vector_4	Razor + unique peptides WT_1	Razor + unique peptides WT_2	Razor + unique peptides WT_3	Razor + unique peptides WT_4	Unique peptides Mut_1	Unique peptides Mut_2	Unique peptides Mut_3	Unique peptides Mut_4	Unique peptides Vector_1	Unique peptides Vector_2	Unique peptides Vector_3	Unique peptides Vector_4	Unique peptides WT_1	Unique peptides WT_2	Unique peptides WT_3	Unique peptides WT_4	Sequence coverage [%]	Unique + razor sequence coverage [%]
A0JLT2-2;A0JLT2	A0JLT2-2;A0JLT2	2;2	2;2	2;2	Mediator of RNA polymerase II transcription subunit 19	MED19	>sp|A0JLT2-2|MED19_HUMAN Isoform 2 of Mediator of RNA polymerase II transcription subunit 19 OS=Homo sapiens GN=MED19;>sp|A0JLT2|MED19_HUMAN Mediator of RNA polymerase II transcription subunit 19 OS=Homo sapiens GN=MED19 PE=1 SV=2	2	2	2	2	1	1	2	0	2	1	2	1	1	1	1	1	1	1	2	0	2	1	2	1	1	1	1	1	1	1	2	0	2	1	2	1	1	1	1	1	19.1	19.1
A1L390;A1L390-3;G3V3I3;G3V278	A1L390;A1L390-3	13;12;3;3	13;12;3;3	13;12;3;3	Pleckstrin homology domain-containing family G member 3	PLEKHG3	>sp|A1L390|PKHG3_HUMAN Pleckstrin homology domain-containing family G member 3 OS=Homo sapiens GN=PLEKHG3 PE=1 SV=1;>sp|A1L390-3|PKHG3_HUMAN Isoform 3 of Pleckstrin homology domain-containing family G member 3 OS=Homo sapiens GN=PLEKHG3	4	13	13	13	7	9	12	10	6	6	7	10	6	7	7	8	7	9	12	10	6	6	7	10	6	7	7	8	7	9	12	10	6	6	7	10	6	7	7	8	14	14
F8VZD8;F8VX64;F8VW91;F8VSI2;F8VNV9;F5GXS0;B0UZ83;A6H8M8;Q6U2E9;Q5JNX2;P0C0L5;P0C0L4;B0V2C8;A2BHY4	F8VZD8;F8VX64;F8VW91;F8VSI2;F8VNV9;F5GXS0;B0UZ83;A6H8M8;Q6U2E9;Q5JNX2;P0C0L5;P0C0L4;B0V2C8;A2BHY4	2;2;2;2;2;2;2;2;2;2;2;2;2;2	2;2;2;2;2;2;2;2;2;2;2;2;2;2	2;2;2;2;2;2;2;2;2;2;2;2;2;2	Complement C4-A;Complement C4 beta chain;Complement C4-A alpha chain;C4a anaphylatoxin;C4b-A;C4d-A;Complement C4 gamma chain;Complement C4-B;Complement C4 beta chain;Complement C4-B alpha chain;C4a anaphylatoxin;C4b-B;C4d-B;Complement C4 gamma chain	C4B;C4A	>tr|F8VZD8|F8VZD8_HUMAN Complement C4 gamma chain OS=Homo sapiens GN=C4A PE=4 SV=1;>tr|F8VX64|F8VX64_HUMAN Uncharacterized protein OS=Homo sapiens PE=4 SV=1;>tr|F8VW91|F8VW91_HUMAN Complement C4 gamma chain OS=Homo sapiens GN=C4A PE=4 SV=1;>tr|F8VSI2|F8VSI	14	2	2	2	1	0	1	0	1	0	0	1	1	0	0	0	1	0	1	0	1	0	0	1	1	0	0	0	1	0	1	0	1	0	0	1	1	0	0	0	1.3	1.3
A4D1E9;C9J8R7;C9JNI1;A4D1E9-2;C9JEQ8	A4D1E9;C9J8R7;C9JNI1;A4D1E9-2	3;2;2;2;1	3;2;2;2;1	3;2;2;2;1	GTP-binding protein 10	GTPBP10	>sp|A4D1E9|GTPBA_HUMAN GTP-binding protein 10 OS=Homo sapiens GN=GTPBP10 PE=1 SV=1;>tr|C9J8R7|C9J8R7_HUMAN GTP-binding protein 10 (Fragment) OS=Homo sapiens GN=GTPBP10 PE=4 SV=1;>tr|C9JNI1|C9JNI1_HUMAN GTP-binding protein 10 (Fragment) OS=Homo sapiens GN=G	5	3	3	3	2	1	0	1	0	0	1	2	0	0	0	0	2	1	0	1	0	0	1	2	0	0	0	0	2	1	0	1	0	0	1	2	0	0	0	0	11.9	11.9
A6H8Z7;Q6UWP7;C9K0C3;Q6UWP7-2;C9J5S5;C9JA02;C9JMW2;C9JUV9;C9JXY8;C9J6F4	A6H8Z7;Q6UWP7	7;7;3;3;1;1;1;1;1;1	7;7;3;3;1;1;1;1;1;1	7;7;3;3;1;1;1;1;1;1	Lysocardiolipin acyltransferase 1	LCLAT1	>tr|A6H8Z7|A6H8Z7_HUMAN Lysocardiolipin acyltransferase 1 OS=Homo sapiens GN=LCLAT1 PE=2 SV=1;>sp|Q6UWP7|LCLT1_HUMAN Lysocardiolipin acyltransferase 1 OS=Homo sapiens GN=LCLAT1 PE=1 SV=1	10	7	7	7	6	5	5	3	6	3	4	7	4	5	6	5	6	5	5	3	6	3	4	7	4	5	6	5	6	5	5	3	6	3	4	7	4	5	6	5	21	21
F5GYI5;F8W6V8;CON__O43790;CON__Q6NT21;CON__P78385;CON__Q14533;CON__P78386;O43790;A6NCN2;P78385;Q14533;P78386	F5GYI5;F8W6V8;CON__O43790;CON__Q6NT21;CON__P78385;CON__Q14533;CON__P78386;O43790;A6NCN2;P78385;Q14533;P78386	1;1;1;1;1;1;1;1;1;1;1;1	1;1;1;1;1;1;1;1;1;1;1;1	1;1;1;1;1;1;1;1;1;1;1;1	Keratin, type II cuticular Hb6;Putative keratin-87 protein;Keratin, type II cuticular Hb3;Keratin, type II cuticular Hb1;Keratin, type II cuticular Hb5	KRT85;KRT86;KRT87P;KRT83;KRT81	>tr|F5GYI5|F5GYI5_HUMAN Keratin, type II cuticular Hb5 OS=Homo sapiens GN=KRT85 PE=3 SV=1;>tr|F8W6V8|F8W6V8_HUMAN Keratin, type II cuticular Hb1 OS=Homo sapiens GN=KRT81 PE=3 SV=1;>O43790 SWISS-PROT:O43790 Keratin, type II cuticular Hb6 (Hair keratin, type	12	1	1	1	0	1	0	1	1	0	0	1	1	0	1	0	0	1	0	1	1	0	0	1	1	0	1	0	0	1	0	1	1	0	0	1	1	0	1	0	3.4	3.4
A6NLU8;A6NCU2;B7Z227;A6NHW8;Q8N5Y2-2;Q8N5Y2-3;Q8N5Y2;C9JKR8;C9JXM9;H7C522	A6NLU8;A6NCU2;B7Z227;A6NHW8;Q8N5Y2-2;Q8N5Y2-3;Q8N5Y2;C9JKR8	3;3;3;3;3;3;3;2;1;1	3;3;3;3;3;3;3;2;1;1	3;3;3;3;3;3;3;2;1;1	Male-specific lethal 3 homolog	MSL3	>tr|A6NLU8|A6NLU8_HUMAN Male-specific lethal 3 homolog (Fragment) OS=Homo sapiens GN=MSL3 PE=4 SV=1;>tr|A6NCU2|A6NCU2_HUMAN Male-specific lethal 3 homolog OS=Homo sapiens GN=MSL3 PE=4 SV=1;>tr|B7Z227|B7Z227_HUMAN Male-specific lethal 3 homolog OS=Homo sapi	10	3	3	3	0	1	2	1	1	1	2	1	1	0	1	1	0	1	2	1	1	1	2	1	1	0	1	1	0	1	2	1	1	1	2	1	1	0	1	1	19.9	19.9
A6NCZ6;Q9BWM7	A6NCZ6;Q9BWM7	8;8	8;8	8;8	Sideroflexin-3	SFXN3	>tr|A6NCZ6|A6NCZ6_HUMAN Sideroflexin 3 OS=Homo sapiens GN=SFXN3 PE=4 SV=1;>sp|Q9BWM7|SFXN3_HUMAN Sideroflexin-3 OS=Homo sapiens GN=SFXN3 PE=2 SV=2	2	8	8	8	5	6	4	4	3	6	5	4	6	7	6	7	5	6	4	4	3	6	5	4	6	7	6	7	5	6	4	4	3	6	5	4	6	7	6	7	33.2	33.2
A6ND22;B4E032;Q9Y3D3	A6ND22;B4E032;Q9Y3D3	3;3;3	3;3;3	3;3;3	28S ribosomal protein S16, mitochondrial	MRPS16	>tr|A6ND22|A6ND22_HUMAN 28S ribosomal protein S16, mitochondrial OS=Homo sapiens GN=MRPS16 PE=3 SV=1;>tr|B4E032|B4E032_HUMAN 28S ribosomal protein S16, mitochondrial OS=Homo sapiens GN=MRPS16 PE=2 SV=1;>sp|Q9Y3D3|RT16_HUMAN 28S ribosomal protein S16, mitoc	3	3	3	3	3	1	1	1	0	1	2	2	1	2	1	1	3	1	1	1	0	1	2	2	1	2	1	1	3	1	1	1	0	1	2	2	1	2	1	1	39.4	39.4
A6ND36;A6ND36-2	A6ND36	29;13	29;13	29;13	Protein FAM83G	FAM83G	>sp|A6ND36|FA83G_HUMAN Protein FAM83G OS=Homo sapiens GN=FAM83G PE=1 SV=2	2	29	29	29	24	24	26	25	24	23	23	19	25	23	25	26	24	24	26	25	24	23	23	19	25	23	25	26	24	24	26	25	24	23	23	19	25	23	25	26	44.2	44.2
A6NEM2;P51610-2;P51610;H7C1C4;P51610-3;Q9Y5Z7	A6NEM2;P51610-2;P51610	13;13;13;5;1;1	13;13;13;5;1;1	13;13;13;5;1;1	Host cell factor 1;HCF N-terminal chain 1;HCF N-terminal chain 2;HCF N-terminal chain 3;HCF N-terminal chain 4;HCF N-terminal chain 5;HCF N-terminal chain 6;HCF C-terminal chain 1;HCF C-terminal chain 2;HCF C-terminal chain 3;HCF C-terminal chain 4;HCF C-terminal chain 5;HCF C-terminal chain 6	HCFC1	>tr|A6NEM2|A6NEM2_HUMAN HCF C-terminal chain 6 OS=Homo sapiens GN=HCFC1 PE=4 SV=2;>sp|P51610-2|HCFC1_HUMAN Isoform 2 of Host cell factor 1 OS=Homo sapiens GN=HCFC1;>sp|P51610|HCFC1_HUMAN Host cell factor 1 OS=Homo sapiens GN=HCFC1 PE=1 SV=2	6	13	13	13	9	8	7	3	12	10	11	8	7	10	9	7	9	8	7	3	12	10	11	8	7	10	9	7	9	8	7	3	12	10	11	8	7	10	9	7	8.2	8.2
F5H1G9;F8WA55;F8WA56;A6NFN2;Q8IZP0-10;Q8IZP0-8;Q8IZP0-7;Q8IZP0-2;Q8IZP0-4;Q8IZP0-3;Q8IZP0-5;Q8IZP0-6;Q8IZP0-9;H7BXI6;Q8IZP0;Q8IZP0-11	F5H1G9;F8WA55;F8WA56;A6NFN2;Q8IZP0-10;Q8IZP0-8;Q8IZP0-7;Q8IZP0-2;Q8IZP0-4;Q8IZP0-3;Q8IZP0-5;Q8IZP0-6;Q8IZP0-9;H7BXI6;Q8IZP0	3;3;3;3;2;2;2;2;2;2;2;2;2;2;2;1	3;3;3;3;2;2;2;2;2;2;2;2;2;2;2;1	3;3;3;3;2;2;2;2;2;2;2;2;2;2;2;1	Abl interactor 1	ABI1	>tr|F5H1G9|F5H1G9_HUMAN Abl interactor 1 OS=Homo sapiens GN=ABI1 PE=4 SV=1;>tr|F8WA55|F8WA55_HUMAN Abl interactor 1 OS=Homo sapiens GN=ABI1 PE=4 SV=1;>tr|F8WA56|F8WA56_HUMAN Abl interactor 1 OS=Homo sapiens GN=ABI1 PE=4 SV=1;>tr|A6NFN2|A6NFN2_HUMAN Abl int	16	3	3	3	1	0	2	2	1	2	2	2	0	1	1	1	1	0	2	2	1	2	2	2	0	1	1	1	1	0	2	2	1	2	2	2	0	1	1	1	9.9	9.9
B0QYY6;I3L1D4;B0QYY7;F8VR27;F8VZY7;B0QYV1;B0QYY4;F8WAC5;F8VRS4;F8W9K3;B7Z1U7;F8VZG9;A6NFN3;O43251-3;O43251-9;Q9NWB1-3;O43251-4;O43251-5;O43251-10;O43251-2;O43251;Q9NWB1-4;Q9NWB1-5;Q9NWB1;O43251-7;Q9NWB1-2;O43251-6;O43251-8	B0QYY6;I3L1D4;B0QYY7;F8VR27;F8VZY7;B0QYV1;B0QYY4;F8WAC5;F8VRS4;F8W9K3;B7Z1U7;F8VZG9;A6NFN3;O43251-3;O43251-9;Q9NWB1-3;O43251-4;O43251-5;O43251-10;O43251-2;O43251;Q9NWB1-4;Q9NWB1-5;Q9NWB1;O43251-7;Q9NWB1-2;O43251-6;O43251-8	1;1;1;1;1;1;1;1;1;1;1;1;1;1;1;1;1;1;1;1;1;1;1;1;1;1;1;1	1;1;1;1;1;1;1;1;1;1;1;1;1;1;1;1;1;1;1;1;1;1;1;1;1;1;1;1	1;1;1;1;1;1;1;1;1;1;1;1;1;1;1;1;1;1;1;1;1;1;1;1;1;1;1;1	RNA binding protein fox-1 homolog;RNA binding protein fox-1 homolog 3;RNA binding protein fox-1 homolog 2;RNA binding protein fox-1 homolog 1	RBFOX2;RBFOX1;RBFOX3	>tr|B0QYY6|B0QYY6_HUMAN RNA binding motif protein 9 (Fragment) OS=Homo sapiens GN=RBM9 PE=4 SV=1;>tr|I3L1D4|I3L1D4_HUMAN RNA-binding protein fox-1 homolog 1 (Fragment) OS=Homo sapiens GN=RBFOX1 PE=4 SV=1;>tr|B0QYY7|B0QYY7_HUMAN RNA binding motif protein 9	28	1	1	1	1	1	1	1	0	0	0	0	0	0	0	1	1	1	1	1	0	0	0	0	0	0	0	1	1	1	1	1	0	0	0	0	0	0	0	1	7.8	7.8
Q7Z7H8;A6NGJ4	Q7Z7H8;A6NGJ4	5;5	5;5	5;5	39S ribosomal protein L10, mitochondrial	MRPL10	>sp|Q7Z7H8|RM10_HUMAN 39S ribosomal protein L10, mitochondrial OS=Homo sapiens GN=MRPL10 PE=1 SV=3;>tr|A6NGJ4|A6NGJ4_HUMAN 39S ribosomal protein L10, mitochondrial OS=Homo sapiens GN=MRPL10 PE=2 SV=1	2	5	5	5	3	4	5	4	4	2	2	5	3	3	5	3	3	4	5	4	4	2	2	5	3	3	5	3	3	4	5	4	4	2	2	5	3	3	5	3	28	28
A6NGW1;O95070;E9PIZ0;C9JST7;F8W9A1;E9PS11	A6NGW1;O95070;E9PIZ0;C9JST7;F8W9A1	4;4;3;3;2;1	4;4;3;3;2;1	4;4;3;3;2;1	Protein YIF1A	YIF1A	>tr|A6NGW1|A6NGW1_HUMAN Protein YIF1A OS=Homo sapiens GN=YIF1A PE=4 SV=1;>sp|O95070|YIF1A_HUMAN Protein YIF1A OS=Homo sapiens GN=YIF1A PE=1 SV=2;>tr|E9PIZ0|E9PIZ0_HUMAN Protein YIF1A (Fragment) OS=Homo sapiens GN=YIF1A PE=4 SV=1;>tr|C9JST7|C9JST7_HUMAN Pro	6	4	4	4	2	3	3	2	3	2	3	3	4	2	3	2	2	3	3	2	3	2	3	3	4	2	3	2	2	3	3	2	3	2	3	3	4	2	3	2	19.5	19.5
F5H540;F5GWN9;F8WE42;F5H101;A6NJK7;Q76FK4-4;Q76FK4;Q76FK4-2;F5H797;F5H8B8;F5H692;Q76FK4-3;F5H7D5;F5GXV1;F5H532;F5H0I5	F5H540;F5GWN9;F8WE42;F5H101;A6NJK7;Q76FK4-4;Q76FK4;Q76FK4-2;F5H797;F5H8B8;F5H692;Q76FK4-3	4;4;4;4;4;4;4;3;2;2;2;2;1;1;1;1	4;4;4;4;4;4;4;3;2;2;2;2;1;1;1;1	4;4;4;4;4;4;4;3;2;2;2;2;1;1;1;1	Nucleolar protein 8	NOL8	>tr|F5H540|F5H540_HUMAN Nucleolar protein 8 (Fragment) OS=Homo sapiens GN=NOL8 PE=4 SV=1;>tr|F5GWN9|F5GWN9_HUMAN Nucleolar protein 8 (Fragment) OS=Homo sapiens GN=NOL8 PE=4 SV=1;>tr|F8WE42|F8WE42_HUMAN Nucleolar protein 8 (Fragment) OS=Homo sapiens GN=NOL8	16	4	4	4	2	3	1	2	1	2	1	1	2	2	3	4	2	3	1	2	1	2	1	1	2	2	3	4	2	3	1	2	1	2	1	1	2	2	3	4	22.9	22.9
A6NKD9;H0YJE0;H0YJY5;G3V2D7;G3V5D5;G3V4C8	A6NKD9	14;5;4;3;2;2	14;5;4;3;2;2	14;5;4;3;2;2	Coiled-coil domain-containing protein 85C	CCDC85C	>sp|A6NKD9|CC85C_HUMAN Coiled-coil domain-containing protein 85C OS=Homo sapiens GN=CCDC85C PE=1 SV=1	6	14	14	14	10	7	12	10	6	5	7	9	7	6	4	9	10	7	12	10	6	5	7	9	7	6	4	9	10	7	12	10	6	5	7	9	7	6	4	9	42	42
H0YFP4;E9PKY3;A6NKF9;B7ZAQ6-2;B7ZAQ6-3;P0CG08;B7ZAQ6	H0YFP4;E9PKY3;A6NKF9;B7ZAQ6-2;B7ZAQ6-3;P0CG08;B7ZAQ6	1;1;1;1;1;1;1	1;1;1;1;1;1;1	1;1;1;1;1;1;1	Putative Golgi pH regulator C;Golgi pH regulator A;Golgi pH regulator B	GPR89A;GPR89C;GPR89B	>tr|H0YFP4|H0YFP4_HUMAN Putative Golgi pH regulator C (Fragment) OS=Homo sapiens GN=GPR89C PE=4 SV=1;>tr|E9PKY3|E9PKY3_HUMAN Golgi pH regulator A OS=Homo sapiens GN=GPR89A PE=4 SV=1;>sp|A6NKF9|GPHRC_HUMAN Putative Golgi pH regulator C OS=Homo sapiens GN=GP	7	1	1	1	1	1	1	0	1	1	1	1	1	1	0	0	1	1	1	0	1	1	1	1	1	1	0	0	1	1	1	0	1	1	1	1	1	1	0	0	9.8	9.8
Q7Z3J3;A6NKT7;C9JX22;B4DZH4;F8VYC4;P0DJD0;P0DJD1;H0YBN8;C9J6W1;C9J149;Q7Z3J3-2	Q7Z3J3;A6NKT7;C9JX22;B4DZH4	6;6;5;5;2;2;2;1;1;1;1	1;1;1;1;0;0;0;0;0;0;0	1;1;1;1;0;0;0;0;0;0;0	RanBP2-like and GRIP domain-containing protein 4;RanBP2-like and GRIP domain-containing protein 3	RGPD4;RGPD3	>sp|Q7Z3J3|RGPD4_HUMAN RanBP2-like and GRIP domain-containing protein 4 OS=Homo sapiens GN=RGPD4 PE=2 SV=3;>sp|A6NKT7|RGPD3_HUMAN RanBP2-like and GRIP domain-containing protein 3 OS=Homo sapiens GN=RGPD3 PE=2 SV=2;>tr|C9JX22|C9JX22_HUMAN RanBP2-like and GR	11	6	1	1	5	5	5	3	3	4	5	5	4	5	5	6	1	1	1	0	1	1	1	1	1	1	1	1	1	1	1	0	1	1	1	1	1	1	1	1	4	0.7
A6NLH6;Q9P003	A6NLH6;Q9P003	1;1	1;1	1;1	Protein cornichon homolog 4	CNIH4	>tr|A6NLH6|A6NLH6_HUMAN Protein cornichon homolog 4 OS=Homo sapiens GN=CNIH4 PE=4 SV=1;>sp|Q9P003|CNIH4_HUMAN Protein cornichon homolog 4 OS=Homo sapiens GN=CNIH4 PE=2 SV=1	2	1	1	1	1	1	1	1	1	1	1	1	1	1	1	1	1	1	1	1	1	1	1	1	1	1	1	1	1	1	1	1	1	1	1	1	1	1	1	1	14.6	14.6
A6NML8;F5H7I1;O60879-2;O60879;C9J6U3;O60879-3	A6NML8;F5H7I1;O60879-2;O60879;C9J6U3;O60879-3	13;13;13;13;12;12	13;13;13;13;12;12	13;13;13;13;12;12	Protein diaphanous homolog 2	DIAPH2	>tr|A6NML8|A6NML8_HUMAN Diaphanous homolog 2 (Drosophila), isoform CRA_c OS=Homo sapiens GN=DIAPH2 PE=4 SV=3;>tr|F5H7I1|F5H7I1_HUMAN Protein diaphanous homolog 2 OS=Homo sapiens GN=DIAPH2 PE=4 SV=1;>sp|O60879-2|DIAP2_HUMAN Isoform 2 of Protein diaphanous h	6	13	13	13	2	1	3	2	9	3	7	6	1	2	0	1	2	1	3	2	9	3	7	6	1	2	0	1	2	1	3	2	9	3	7	6	1	2	0	1	15.4	15.4
H0YEL5;C9JQD4;A6NNE7;O43447	H0YEL5;C9JQD4;A6NNE7;O43447	2;2;2;2	2;2;2;2	2;2;2;2	Peptidyl-prolyl cis-trans isomerase;Peptidyl-prolyl cis-trans isomerase H	PPIH	>tr|H0YEL5|H0YEL5_HUMAN Peptidyl-prolyl cis-trans isomerase H (Fragment) OS=Homo sapiens GN=PPIH PE=3 SV=1;>tr|C9JQD4|C9JQD4_HUMAN Peptidyl-prolyl cis-trans isomerase (Fragment) OS=Homo sapiens GN=PPIH PE=3 SV=1;>tr|A6NNE7|A6NNE7_HUMAN Peptidyl-prolyl cis-	4	2	2	2	0	0	1	0	0	1	1	0	1	1	1	1	0	0	1	0	0	1	1	0	1	1	1	1	0	0	1	0	0	1	1	0	1	1	1	1	18.8	18.8
A6PVX3;Q5VWC4;P55036-2;P55036	A6PVX3;Q5VWC4;P55036-2;P55036	1;1;1;1	1;1;1;1	1;1;1;1	26S proteasome non-ATPase regulatory subunit 4	PSMD4	>tr|A6PVX3|A6PVX3_HUMAN 26S proteasome non-ATPase regulatory subunit 4 (Fragment) OS=Homo sapiens GN=PSMD4 PE=4 SV=1;>tr|Q5VWC4|Q5VWC4_HUMAN 26S proteasome non-ATPase regulatory subunit 4 OS=Homo sapiens GN=PSMD4 PE=2 SV=1;>sp|P55036-2|PSMD4_HUMAN Isoform	4	1	1	1	0	0	1	0	0	0	1	1	0	0	0	0	0	0	1	0	0	0	1	1	0	0	0	0	0	0	1	0	0	0	1	1	0	0	0	0	8.9	8.9
A6PW57;Q99755-3;Q99755-2;Q99755-4;Q99755;A2A3N6;B4DY52;A2A5X0;O60331-4;O60331;O60331-2;O60331-3;A6PW58;F2Z3N1;B4DIG7;O14986;O14986-2	A6PW57;Q99755-3;Q99755-2;Q99755-4;Q99755;A2A3N6	17;17;16;15;15;9;7;3;2;2;2;2;1;1;1;1;1	17;17;16;15;15;9;7;3;2;2;2;2;1;1;1;1;1	17;17;16;15;15;9;7;3;2;2;2;2;1;1;1;1;1	Phosphatidylinositol 4-phosphate 5-kinase type-1 alpha;Putative PIP5K1A and PSMD4-like protein	PIP5K1A;PIPSL	>tr|A6PW57|A6PW57_HUMAN Phosphatidylinositol 4-phosphate 5-kinase type-1 alpha OS=Homo sapiens GN=PIP5K1A PE=4 SV=2;>sp|Q99755-3|PI51A_HUMAN Isoform 3 of Phosphatidylinositol 4-phosphate 5-kinase type-1 alpha OS=Homo sapiens GN=PIP5K1A;>sp|Q99755-2|PI51A_H	17	17	17	17	15	13	12	11	9	8	12	16	12	13	13	13	15	13	12	11	9	8	12	16	12	13	13	13	15	13	12	11	9	8	12	16	12	13	13	13	38.5	38.5
A7KAX9-2;A7KAX9;G3V174;H0Y810	A7KAX9-2;A7KAX9	5;5;1;1	5;5;1;1	5;5;1;1	Rho GTPase-activating protein 32	ARHGAP32	>sp|A7KAX9-2|RHG32_HUMAN Isoform 2 of Rho GTPase-activating protein 32 OS=Homo sapiens GN=ARHGAP32;>sp|A7KAX9|RHG32_HUMAN Rho GTPase-activating protein 32 OS=Homo sapiens GN=ARHGAP32 PE=1 SV=1	4	5	5	5	0	2	2	0	2	2	2	3	0	0	0	0	0	2	2	0	2	2	2	3	0	0	0	0	0	2	2	0	2	2	2	3	0	0	0	0	3.6	3.6
B4E3S0;Q9ULV4;A7MAP0;H0YHL7;F8VV53;F8W1H8;F8VUX3;F8VSA4;F8VRE9;F8VTT6;F8VVB7	B4E3S0;Q9ULV4;A7MAP0	5;5;5;2;1;1;1;1;1;1;1	5;5;5;2;1;1;1;1;1;1;1	5;5;5;2;1;1;1;1;1;1;1	Coronin;Coronin-1C	CORO1C	>tr|B4E3S0|B4E3S0_HUMAN Coronin-1C OS=Homo sapiens GN=CORO1C PE=2 SV=1;>sp|Q9ULV4|COR1C_HUMAN Coronin-1C OS=Homo sapiens GN=CORO1C PE=1 SV=1;>tr|A7MAP0|A7MAP0_HUMAN Coronin-1C OS=Homo sapiens GN=CORO1C PE=2 SV=1	11	5	5	5	1	2	2	5	1	2	2	2	2	1	4	4	1	2	2	5	1	2	2	2	2	1	4	4	1	2	2	5	1	2	2	2	2	1	4	4	18.4	18.4
A8CG34;Q96HA1;C9JFL1;Q96HA1-2;A8CG34-2;Q96HA1-3;A8MXF9	A8CG34;Q96HA1	3;2;1;1;1;1;1	3;2;1;1;1;1;1	3;2;1;1;1;1;1	Nuclear envelope pore membrane protein POM 121C;Nuclear envelope pore membrane protein POM 121	POM121C;POM121	>sp|A8CG34|P121C_HUMAN Nuclear envelope pore membrane protein POM 121C OS=Homo sapiens GN=POM121C PE=1 SV=2;>sp|Q96HA1|P121A_HUMAN Nuclear envelope pore membrane protein POM 121 OS=Homo sapiens GN=POM121 PE=1 SV=2	7	3	3	3	0	0	0	0	0	0	1	2	0	0	1	0	0	0	0	0	0	0	1	2	0	0	1	0	0	0	0	0	0	0	1	2	0	0	1	0	3.1	3.1
H0YEY9;H0YEB8;A8K1C9;Q96LT9	H0YEY9;H0YEB8;A8K1C9;Q96LT9	2;2;2;2	2;2;2;2	2;2;2;2	RNA-binding protein 40	RNPC3	>tr|H0YEY9|H0YEY9_HUMAN RNA-binding protein 40 (Fragment) OS=Homo sapiens GN=RNPC3 PE=4 SV=1;>tr|H0YEB8|H0YEB8_HUMAN RNA-binding protein 40 (Fragment) OS=Homo sapiens GN=RNPC3 PE=4 SV=1;>tr|A8K1C9|A8K1C9_HUMAN RNA-binding protein 40 OS=Homo sapiens GN=RNPC	4	2	2	2	1	1	0	0	0	1	1	0	1	1	2	1	1	1	0	0	0	1	1	0	1	1	2	1	1	1	0	0	0	1	1	0	1	1	2	1	18	18
A8K3Z3;P62195;Q8NB90-3;Q8NB90-2;Q8NB90	A8K3Z3;P62195	3;3;1;1;1	3;3;1;1;1	3;3;1;1;1	26S protease regulatory subunit 8	PSMC5	>tr|A8K3Z3|A8K3Z3_HUMAN 26S protease regulatory subunit 8 OS=Homo sapiens GN=PSMC5 PE=2 SV=1;>sp|P62195|PRS8_HUMAN 26S protease regulatory subunit 8 OS=Homo sapiens GN=PSMC5 PE=1 SV=1	5	3	3	3	1	1	2	2	2	0	0	2	0	2	2	2	1	1	2	2	2	0	0	2	0	2	2	2	1	1	2	2	2	0	0	2	0	2	2	2	11.8	11.8
Q9ULG6-4;Q9ULG6-2;Q9ULG6;A8K9T0;Q9ULG6-3	Q9ULG6-4;Q9ULG6-2;Q9ULG6;A8K9T0;Q9ULG6-3	2;2;2;2;1	2;2;2;2;1	2;2;2;2;1	Cell cycle progression protein 1	CCPG1	>sp|Q9ULG6-4|CCPG1_HUMAN Isoform 4 of Cell cycle progression protein 1 OS=Homo sapiens GN=CCPG1;>sp|Q9ULG6-2|CCPG1_HUMAN Isoform 2 of Cell cycle progression protein 1 OS=Homo sapiens GN=CCPG1;>sp|Q9ULG6|CCPG1_HUMAN Cell cycle progression protein 1 OS=Homo	5	2	2	2	1	1	1	1	1	1	1	1	2	1	1	1	1	1	1	1	1	1	1	1	2	1	1	1	1	1	1	1	1	1	1	1	2	1	1	1	3.2	3.2
A8MXE8;E7ETW1;E7EVZ3;C9JWB0;A8MTC3;Q7Z5J4-4;Q7Z5J4-3;Q7Z5J4-2;Q7Z5J4	A8MXE8;E7ETW1;E7EVZ3;C9JWB0;A8MTC3;Q7Z5J4-4;Q7Z5J4-3;Q7Z5J4-2;Q7Z5J4	8;8;8;8;8;8;8;8;8	8;8;8;8;8;8;8;8;8	8;8;8;8;8;8;8;8;8	Retinoic acid-induced protein 1	RAI1	>tr|A8MXE8|A8MXE8_HUMAN Retinoic acid-induced protein 1 (Fragment) OS=Homo sapiens GN=RAI1 PE=4 SV=1;>tr|E7ETW1|E7ETW1_HUMAN Retinoic acid-induced protein 1 OS=Homo sapiens GN=RAI1 PE=4 SV=1;>tr|E7EVZ3|E7EVZ3_HUMAN Retinoic acid-induced protein 1 OS=Homo s	9	8	8	8	3	3	3	3	3	3	4	4	3	3	5	5	3	3	3	3	3	3	4	4	3	3	5	5	3	3	3	3	3	3	4	4	3	3	5	5	12.8	12.8
A8MTG3;H0Y3M2;O43670-3;O43670-2;O43670;E1P660	A8MTG3;H0Y3M2;O43670-3;O43670-2;O43670;E1P660	2;2;2;2;2;2	2;2;2;2;2;2	2;2;2;2;2;2	BUB3-interacting and GLEBS motif-containing protein ZNF207	ZNF207	>tr|A8MTG3|A8MTG3_HUMAN Zinc finger protein 207 OS=Homo sapiens GN=ZNF207 PE=4 SV=1;>tr|H0Y3M2|H0Y3M2_HUMAN Zinc finger protein 207 OS=Homo sapiens GN=ZNF207 PE=4 SV=1;>sp|O43670-3|ZN207_HUMAN Isoform 3 of Zinc finger protein 207 OS=Homo sapiens GN=ZNF207;	6	2	2	2	1	0	1	1	0	1	1	2	0	0	1	1	1	0	1	1	0	1	1	2	0	0	1	1	1	0	1	1	0	1	1	2	0	0	1	1	7.4	7.4
A8MTU8;B5MD58;E7ERU1;B4DGV9;H3BLZ6;P36956-3;P36956-2;P36956;P36956-4	A8MTU8;B5MD58;E7ERU1;B4DGV9;H3BLZ6;P36956-3;P36956-2;P36956;P36956-4	2;2;2;2;2;2;2;2;2	2;2;2;2;2;2;2;2;2	2;2;2;2;2;2;2;2;2	Sterol regulatory element-binding protein 1;Processed sterol regulatory element-binding protein 1	SREBF1	>tr|A8MTU8|A8MTU8_HUMAN Sterol regulatory element-binding protein 1 OS=Homo sapiens GN=SREBF1 PE=2 SV=1;>tr|B5MD58|B5MD58_HUMAN Sterol regulatory element-binding protein 1 OS=Homo sapiens GN=SREBF1 PE=4 SV=1;>tr|E7ERU1|E7ERU1_HUMAN Sterol regulatory elemen	9	2	2	2	1	2	2	1	2	2	2	1	2	1	1	1	1	2	2	1	2	2	2	1	2	1	1	1	1	2	2	1	2	2	2	1	2	1	1	1	2.9	2.9
Q86TN4;A8MU17;Q86TN4-2;F5H8A0;F5H2B2;F5H6B6;F5H1K3;H0YGY9	Q86TN4;A8MU17;Q86TN4-2;F5H8A0;F5H2B2;F5H6B6	9;9;8;6;6;5;4;3	9;9;8;6;6;5;4;3	9;9;8;6;6;5;4;3	tRNA 2-phosphotransferase 1	TRPT1	>sp|Q86TN4|TRPT1_HUMAN tRNA 2-phosphotransferase 1 OS=Homo sapiens GN=TRPT1 PE=1 SV=2;>tr|A8MU17|A8MU17_HUMAN tRNA 2-phosphotransferase 1 OS=Homo sapiens GN=TRPT1 PE=4 SV=2;>sp|Q86TN4-2|TRPT1_HUMAN Isoform 2 of tRNA 2-phosphotransferase 1 OS=Homo sapien	8	9	9	9	8	5	7	6	7	6	7	5	6	7	6	8	8	5	7	6	7	6	7	5	6	7	6	8	8	5	7	6	7	6	7	5	6	7	6	8	50.6	50.6
H7BZT4;A8MUA9;A8MU27;P61956-2;Q6EEV6;P61956;P55854;B4DUW4	H7BZT4;A8MUA9;A8MU27;P61956-2;Q6EEV6;P61956;P55854;B4DUW4	1;1;1;1;1;1;1;1	1;1;1;1;1;1;1;1	1;1;1;1;1;1;1;1	Small ubiquitin-related modifier 2;Small ubiquitin-related modifier 4;Small ubiquitin-related modifier 3	SUMO2;SUMO3;SUMO4	>tr|H7BZT4|H7BZT4_HUMAN Uncharacterized protein OS=Homo sapiens PE=4 SV=1;>tr|A8MUA9|A8MUA9_HUMAN SMT3 suppressor of mif two 3 homolog 3 (Yeast), isoform CRA_d OS=Homo sapiens GN=SUMO3 PE=4 SV=1;>tr|A8MU27|A8MU27_HUMAN Small ubiquitin-related modifier 3 OS	8	1	1	1	0	0	0	0	1	1	1	1	0	0	0	0	0	0	0	0	1	1	1	1	0	0	0	0	0	0	0	0	1	1	1	1	0	0	0	0	12.6	12.6
A8MUB1;P68366;C9JDS9;C9JEV8;C9JQ00;C9JJQ8	A8MUB1;P68366	16;16;6;3;3;3	2;2;0;1;1;1	2;2;0;1;1;1	Tubulin alpha-4A chain	TUBA4A	>tr|A8MUB1|A8MUB1_HUMAN Tubulin alpha-4A chain OS=Homo sapiens GN=TUBA4A PE=2 SV=1;>sp|P68366|TBA4A_HUMAN Tubulin alpha-4A chain OS=Homo sapiens GN=TUBA4A PE=1 SV=1	6	16	2	2	13	13	14	12	12	11	12	13	10	11	10	10	0	0	0	1	0	0	0	1	0	1	0	0	0	0	0	1	0	0	0	1	0	1	0	0	50.3	4.4
H7BY10;A8MXA8;A8MUS3;P62750	H7BY10;A8MXA8;A8MUS3;P62750	7;7;7;7	7;7;7;7	7;7;7;7	60S ribosomal protein L23a	RPL23A	>tr|H7BY10|H7BY10_HUMAN 60S ribosomal protein L23a (Fragment) OS=Homo sapiens GN=RPL23A PE=3 SV=1;>tr|A8MXA8|A8MXA8_HUMAN 60S ribosomal protein L23a OS=Homo sapiens GN=RPL23A PE=3 SV=1;>tr|A8MUS3|A8MUS3_HUMAN 60S ribosomal protein L23a OS=Homo sapiens GN=R	4	7	7	7	6	6	6	6	5	5	6	6	6	6	6	6	6	6	6	6	5	5	6	6	6	6	6	6	6	6	6	6	5	5	6	6	6	6	6	6	34.8	34.8
Q16643;Q16643-2;A8MV58;D6R9W4;D6RCR4;D6RFI1;F8W9Z3;D6R9Q9	Q16643;Q16643-2;A8MV58;D6R9W4	4;4;4;2;1;1;1;1	4;4;4;2;1;1;1;1	4;4;4;2;1;1;1;1	Drebrin	DBN1	>sp|Q16643|DREB_HUMAN Drebrin OS=Homo sapiens GN=DBN1 PE=1 SV=4;>sp|Q16643-2|DREB_HUMAN Isoform 2 of Drebrin OS=Homo sapiens GN=DBN1;>tr|A8MV58|A8MV58_HUMAN Drebrin OS=Homo sapiens GN=DBN1 PE=4 SV=1;>tr|D6R9W4|D6R9W4_HUMAN Drebrin (Fragment) OS=Homo sapien	8	4	4	4	0	0	0	3	0	0	1	2	0	0	0	3	0	0	0	3	0	0	1	2	0	0	0	3	0	0	0	3	0	0	1	2	0	0	0	3	9.6	9.6
H7C571;A8MV65-2;A8MV65	H7C571;A8MV65-2;A8MV65	2;2;2	2;2;2	2;2;2	Transcription cofactor vestigial-like protein 3	VGLL3	>tr|H7C571|H7C571_HUMAN Transcription cofactor vestigial-like protein 3 (Fragment) OS=Homo sapiens GN=VGLL3 PE=4 SV=1;>sp|A8MV65-2|VGLL3_HUMAN Isoform 2 of Transcription cofactor vestigial-like protein 3 OS=Homo sapiens GN=VGLL3;>sp|A8MV65|VGLL3_HUMAN Tran	3	2	2	2	2	1	2	1	2	2	1	2	2	1	1	1	2	1	2	1	2	2	1	2	2	1	1	1	2	1	2	1	2	2	1	2	2	1	1	1	11.5	11.5
A8MVZ6;F8W113;Q96G01-3;Q96G01;F8VZX7;F8W056;Q96G01-2;Q8TD16;Q8TD16-2	A8MVZ6;F8W113;Q96G01-3;Q96G01	5;5;5;5;1;1;1;1;1	5;5;5;5;1;1;1;1;1	5;5;5;5;1;1;1;1;1	Protein bicaudal D homolog 1	GLYAT;BICD1	>tr|A8MVZ6|A8MVZ6_HUMAN BICD1 protein OS=Homo sapiens GN=BICD1 PE=2 SV=3;>tr|F8W113|F8W113_HUMAN Protein bicaudal D homolog 1 OS=Homo sapiens GN=BICD1 PE=4 SV=1;>sp|Q96G01-3|BICD1_HUMAN Isoform 3 of Protein bicaudal D homolog 1 OS=Homo sapiens GN=BICD1;>sp	9	5	5	5	0	1	2	1	3	4	2	5	1	1	1	3	0	1	2	1	3	4	2	5	1	1	1	3	0	1	2	1	3	4	2	5	1	1	1	3	8	8
C9J8F3;A8MVZ9;P09972;B7Z3K7;B7Z1N6	C9J8F3;A8MVZ9;P09972;B7Z3K7;B7Z1N6	2;2;2;1;1	2;2;2;1;1	2;2;2;1;1	Fructose-bisphosphate aldolase C	ALDOC	>tr|C9J8F3|C9J8F3_HUMAN Fructose-bisphosphate aldolase C (Fragment) OS=Homo sapiens GN=ALDOC PE=4 SV=1;>tr|A8MVZ9|A8MVZ9_HUMAN Fructose-bisphosphate aldolase OS=Homo sapiens GN=ALDOC PE=3 SV=1;>sp|P09972|ALDOC_HUMAN Fructose-bisphosphate aldolase C OS=Homo	5	2	2	2	1	0	1	1	1	1	1	1	0	1	1	1	1	0	1	1	1	1	1	1	0	1	1	1	1	0	1	1	1	1	1	1	0	1	1	1	20.8	20.8
H0Y912;A8MW17;Q96NX9-3;B4DQG3;Q96NX9-2;Q96NX9	H0Y912;A8MW17;Q96NX9-3;B4DQG3;Q96NX9-2;Q96NX9	1;1;1;1;1;1	1;1;1;1;1;1	1;1;1;1;1;1	Dachshund homolog 2	DACH2	>tr|H0Y912|H0Y912_HUMAN Dachshund homolog 2 (Fragment) OS=Homo sapiens GN=DACH2 PE=4 SV=1;>tr|A8MW17|A8MW17_HUMAN Dachshund homolog 2 OS=Homo sapiens GN=DACH2 PE=4 SV=2;>sp|Q96NX9-3|DACH2_HUMAN Isoform 3 of Dachshund homolog 2 OS=Homo sapiens GN=DACH2;>tr|	6	1	1	1	0	0	0	0	1	0	0	0	1	0	0	0	0	0	0	0	1	0	0	0	1	0	0	0	0	0	0	0	1	0	0	0	1	0	0	0	3.2	3.2
A8MW61;O43660;O43660-2;D6RA26;B7Z982;H0YA24;H0YAA2	A8MW61;O43660;O43660-2	21;21;20;8;5;5;2	21;21;20;8;5;5;2	21;21;20;8;5;5;2	Pleiotropic regulator 1	PLRG1	>tr|A8MW61|A8MW61_HUMAN Pleiotropic regulator 1 OS=Homo sapiens GN=PLRG1 PE=4 SV=1;>sp|O43660|PLRG1_HUMAN Pleiotropic regulator 1 OS=Homo sapiens GN=PLRG1 PE=1 SV=1;>sp|O43660-2|PLRG1_HUMAN Isoform 2 of Pleiotropic regulator 1 OS=Homo sapiens GN=PLRG1	7	21	21	21	15	15	18	17	15	12	17	15	20	15	15	15	15	15	18	17	15	12	17	15	20	15	15	15	15	15	18	17	15	12	17	15	20	15	15	15	54.1	54.1
Q49AN9;F5H013;P62308;A8MWD9	Q49AN9;F5H013;P62308;A8MWD9	2;2;2;2	2;2;2;2	2;2;2;2	Small nuclear ribonucleoprotein G;Putative small nuclear ribonucleoprotein G-like protein 15	SNRPG;SNRPGP15	>tr|Q49AN9|Q49AN9_HUMAN SNRPG protein OS=Homo sapiens GN=SNRPG PE=4 SV=1;>tr|F5H013|F5H013_HUMAN Small nuclear ribonucleoprotein G OS=Homo sapiens GN=SNRPG PE=4 SV=1;>sp|P62308|RUXG_HUMAN Small nuclear ribonucleoprotein G OS=Homo sapiens GN=SNRPG PE=1 SV=1	4	2	2	2	2	2	2	2	2	2	2	2	2	2	2	2	2	2	2	2	2	2	2	2	2	2	2	2	2	2	2	2	2	2	2	2	2	2	2	2	20.3	20.3
A8MWZ5;E9PCD6;D3YTH2;Q9BZ29-3;Q9BZ29-5;Q9BZ29;Q9BZ29-4;F5GZE8;Q5JUD8;H0Y3S1;F5H1Q4;H7BZ79;Q6ZSL5;Q5JUD3;A6NIW2;Q5JSL3	A8MWZ5;E9PCD6;D3YTH2;Q9BZ29-3;Q9BZ29-5;Q9BZ29;Q9BZ29-4;F5GZE8;Q5JUD8;H0Y3S1;F5H1Q4	5;5;5;5;5;5;5;4;3;3;3;2;2;1;1;1	4;4;4;4;4;4;4;4;3;3;3;2;1;1;1;1	4;4;4;4;4;4;4;4;3;3;3;2;1;1;1;1	Dedicator of cytokinesis protein 9	DOCK9	>tr|A8MWZ5|A8MWZ5_HUMAN Dedicator of cytokinesis protein 9 OS=Homo sapiens GN=DOCK9 PE=4 SV=3;>tr|E9PCD6|E9PCD6_HUMAN Dedicator of cytokinesis protein 9 OS=Homo sapiens GN=DOCK9 PE=4 SV=1;>tr|D3YTH2|D3YTH2_HUMAN Dedicator of cytokinesis protein 9 OS=Homo s	16	5	4	4	1	2	1	1	1	2	3	2	0	1	0	1	0	1	0	0	1	1	2	1	0	1	0	0	0	1	0	0	1	1	2	1	0	1	0	0	2.5	2
A8MX12;P52179-2;P52179	A8MX12;P52179-2;P52179	1;1;1	1;1;1	1;1;1	Myomesin-1	MYOM1	>tr|A8MX12|A8MX12_HUMAN Myomesin-1 OS=Homo sapiens GN=MYOM1 PE=4 SV=2;>sp|P52179-2|MYOM1_HUMAN Isoform 2 of Myomesin-1 OS=Homo sapiens GN=MYOM1;>sp|P52179|MYOM1_HUMAN Myomesin-1 OS=Homo sapiens GN=MYOM1 PE=1 SV=2	3	1	1	1	0	0	0	0	0	0	0	0	0	0	1	0	0	0	0	0	0	0	0	0	0	0	1	0	0	0	0	0	0	0	0	0	0	0	1	0	0.7	0.7
B5MDW0;A8MX39;A8MZ24;P11308-5;P11308-6;P11308-1;P11308-4;P11308;B4E3C5;P11308-2	B5MDW0;A8MX39;A8MZ24;P11308-5;P11308-6;P11308-1;P11308-4;P11308;B4E3C5;P11308-2	2;2;2;2;2;2;2;2;1;1	2;2;2;2;2;2;2;2;1;1	2;2;2;2;2;2;2;2;1;1	Transcriptional regulator ERG	ERG	>tr|B5MDW0|B5MDW0_HUMAN Transcriptional regulator ERG OS=Homo sapiens GN=ERG PE=3 SV=1;>tr|A8MX39|A8MX39_HUMAN Transcriptional regulator ERG OS=Homo sapiens GN=ERG PE=3 SV=1;>tr|A8MZ24|A8MZ24_HUMAN Transcriptional regulator ERG OS=Homo sapiens GN=ERG PE=3	10	2	2	2	0	0	1	0	0	0	0	0	1	1	1	1	0	0	1	0	0	0	0	0	1	1	1	1	0	0	1	0	0	0	0	0	1	1	1	1	6.8	6.8
D6REM6;A8MXP9;P43243;D6R991;H0Y8T4;B3KM87;P43243-2;D6R8Z5;D6RBI2;D6RE02;D6RIA2;D6RB45;D6R9F3;D6RAM9;D6RAY2;D6RBS2;D6RCM3;D6REK4;D6RBK5;Q68E03	D6REM6;A8MXP9;P43243;D6R991;H0Y8T4	10;10;10;9;5;4;4;3;3;3;3;2;2;2;2;2;2;2;2;1	10;10;10;9;5;4;4;3;3;3;3;2;2;2;2;2;2;2;2;1	10;10;10;9;5;4;4;3;3;3;3;2;2;2;2;2;2;2;2;1	Matrin-3	MATR3	>tr|D6REM6|D6REM6_HUMAN Matrin-3 OS=Homo sapiens GN=MATR3 PE=4 SV=1;>tr|A8MXP9|A8MXP9_HUMAN Matrin-3 OS=Homo sapiens GN=MATR3 PE=4 SV=1;>sp|P43243|MATR3_HUMAN Matrin-3 OS=Homo sapiens GN=MATR3 PE=1 SV=2;>tr|D6R991|D6R991_HUMAN Matrin-3 (Fragment) OS=Homo s	20	10	10	10	8	5	7	8	6	5	7	9	8	8	9	7	8	5	7	8	6	5	7	9	8	8	9	7	8	5	7	8	6	5	7	9	8	8	9	7	20.5	20.5
A8MYF6;Q15800	A8MYF6;Q15800	1;1	1;1	1;1	Methylsterol monooxygenase 1	MSMO1	>tr|A8MYF6|A8MYF6_HUMAN Methylsterol monooxygenase 1 OS=Homo sapiens GN=MSMO1 PE=2 SV=1;>sp|Q15800|MSMO1_HUMAN Methylsterol monooxygenase 1 OS=Homo sapiens GN=MSMO1 PE=1 SV=1	2	1	1	1	1	1	1	0	1	0	1	1	0	0	1	0	1	1	1	0	1	0	1	1	0	0	1	0	1	1	1	0	1	0	1	1	0	0	1	0	8.6	8.6
A8MYU4;Q8WWK9-3;E9PD90;Q8WWK9;C9J7Y4;Q8WWK9-2	A8MYU4;Q8WWK9-3;E9PD90;Q8WWK9	3;3;3;3;1;1	3;3;3;3;1;1	3;3;3;3;1;1	Cytoskeleton-associated protein 2	CKAP2	>tr|A8MYU4|A8MYU4_HUMAN Cytoskeleton-associated protein 2 OS=Homo sapiens GN=CKAP2 PE=4 SV=1;>sp|Q8WWK9-3|CKAP2_HUMAN Isoform 3 of Cytoskeleton-associated protein 2 OS=Homo sapiens GN=CKAP2;>tr|E9PD90|E9PD90_HUMAN Cytoskeleton-associated protein 2 OS=Homo	6	3	3	3	3	2	2	3	3	3	3	2	1	1	2	3	3	2	2	3	3	3	3	2	1	1	2	3	3	2	2	3	3	3	3	2	1	1	2	3	9.1	9.1
B8ZZ10;A8MYV2;Q9NQ29-2;Q9NQ29-3;Q9NQ29	B8ZZ10;A8MYV2;Q9NQ29-2;Q9NQ29-3;Q9NQ29	4;4;4;4;4	1;1;1;1;1	1;1;1;1;1	Putative RNA-binding protein Luc7-like 1	LUC7L	>tr|B8ZZ10|B8ZZ10_HUMAN LUC7-like (S. cerevisiae) (Fragment) OS=Homo sapiens GN=LUC7L PE=4 SV=1;>tr|A8MYV2|A8MYV2_HUMAN LUC7-like (S. cerevisiae) OS=Homo sapiens GN=LUC7L PE=4 SV=1;>sp|Q9NQ29-2|LUC7L_HUMAN Isoform 2 of Putative RNA-binding protein Luc7-lik	5	4	1	1	2	2	3	2	3	2	2	4	2	2	2	2	0	0	0	0	0	0	0	1	0	0	0	0	0	0	0	0	0	0	0	1	0	0	0	0	26.4	4.9
A9UHW6;A9UHW6-2	A9UHW6;A9UHW6-2	8;7	8;7	8;7	MIF4G domain-containing protein	MIF4GD	>sp|A9UHW6|MI4GD_HUMAN MIF4G domain-containing protein OS=Homo sapiens GN=MIF4GD PE=1 SV=1;>sp|A9UHW6-2|MI4GD_HUMAN Isoform 2 of MIF4G domain-containing protein OS=Homo sapiens GN=MIF4GD	2	8	8	8	3	5	5	5	6	4	6	4	5	4	4	5	3	5	5	5	6	4	6	4	5	4	4	5	3	5	5	5	6	4	6	4	5	4	4	5	43.2	43.2
H0YBC7;H7BXD2;B0AZS9;O60238	H0YBC7;H7BXD2;B0AZS9;O60238	1;1;1;1	1;1;1;1	1;1;1;1	BCL2/adenovirus E1B 19 kDa protein-interacting protein 3-like	BNIP3L	>tr|H0YBC7|H0YBC7_HUMAN BCL2/adenovirus E1B 19 kDa protein-interacting protein 3-like (Fragment) OS=Homo sapiens GN=BNIP3L PE=4 SV=1;>tr|H7BXD2|H7BXD2_HUMAN BCL2/adenovirus E1B 19 kDa protein-interacting protein 3-like OS=Homo sapiens GN=BNIP3L PE=4 SV=1;>	4	1	1	1	1	0	0	0	0	0	0	0	0	0	0	1	1	0	0	0	0	0	0	0	0	0	0	1	1	0	0	0	0	0	0	0	0	0	0	1	8.1	8.1
B0QYK0;B0QYK1;Q01844-3;Q01844;Q01844-5;H7BY36;C9JGE3;Q01844-2;F8WC90;Q01844-4	B0QYK0;B0QYK1;Q01844-3;Q01844;Q01844-5;H7BY36;C9JGE3;Q01844-2	4;4;4;4;4;3;3;3;1;1	4;4;4;4;4;3;3;3;1;1	4;4;4;4;4;3;3;3;1;1	RNA-binding protein EWS	EWSR1	>tr|B0QYK0|B0QYK0_HUMAN Ewing sarcoma breakpoint region 1 OS=Homo sapiens GN=EWSR1 PE=4 SV=1;>tr|B0QYK1|B0QYK1_HUMAN Ewing sarcoma breakpoint region 1 OS=Homo sapiens GN=EWSR1 PE=4 SV=1;>sp|Q01844-3|EWS_HUMAN Isoform 3 of RNA-binding protein EWS OS=Homo sa	10	4	4	4	3	2	3	2	4	3	4	2	2	1	2	3	3	2	3	2	4	3	4	2	2	1	2	3	3	2	3	2	4	3	4	2	2	1	2	3	11.5	11.5
E7ERM2;B0S7Z4;B0UY12;B0UY14;B0S7Z5;B0UY15;B0S7Z6;Q29960-2;Q29963;Q29960;P30508;Q5SUL6;Q5SRN7;A2BF24;Q5SUL4;Q5SRN5;A2BF25;A2BF26;P01893;P30455;P30447;P30443;P16188;P13746;P05534;P04439;Q29865;P30510;Q07000;Q9TNN7;P30505;P13746-2;F5GXQ3;F8VPX3;H3BM09;B0UXQ1;A9R9N8;A2BDY9;A2ARK8;E9PNV0;B0V0C2;F8VU18;H3BM16;B0UXQ0;B0V0B9;Q5SPM3;A9R9N7;B0V0C1;Q09160;P30512;P30459;P30457;P30456;P30453;P30450;P18462;P16…	E7ERM2;B0S7Z4;B0UY12;B0UY14;B0S7Z5;B0UY15;B0S7Z6;Q29960-2;Q29963;Q29960;P30508;Q5SUL6;Q5SRN7;A2BF24;Q5SUL4;Q5SRN5;A2BF25;A2BF26;P01893;P30455;P30447;P30443;P16188;P13746;P05534;P04439;Q29865;P30510;Q07000;Q9TNN7;P30505;P13746-2;F5GXQ3;F8VPX3;H3BM09;B0UXQ1;A9R9N8;A2BDY9;A2ARK8;E9PNV0;B0V0C2;F8VU18;H3BM16;B0UXQ0;B0V0B9;Q5SPM3;A9R9N7;B0V0C1;Q09160;P30512;P30459;P30457;P30456;P30453;P30450;P18462;P16…	4;4;4;4;4;4;4;4;4;4;4;3;3;3;3;3;3;3;3;3;3;3;3;3;3;3;3;3;3;3;3;3;2;2;2;2;2;2;2;2;2;2;2;2;2;2;2;2;2;2;2;2;2;2;2;2;2;2;2;2;2;2;2;2;1;1;1;1;1;1;1;1;1;1;1;1;1;1	2;2;2;2;2;2;2;2;2;2;2;1;1;2;1;1;2;2;1;1;1;1;1;1;1;1;1;1;1;2;2;1;1;1;1;1;1;1;1;1;1;1;1;1;1;1;1;1;1;1;1;1;1;1;1;1;1;1;1;1;1;1;1;2;1;1;1;1;1;1;1;1;1;1;1;1;1;1	0;0;0;0;0;0;0;0;0;0;0;0;0;0;0;0;0;0;0;0;0;0;0;0;0;0;0;0;0;0;0;0;0;0;0;0;0;0;0;0;0;0;0;0;0;0;0;0;0;0;0;0;0;0;0;0;0;0;0;0;0;0;0;0;0;0;0;0;0;0;0;0;0;0;0;0;0;0	HLA class I histocompatibility antigen, Cw-16 alpha chain;HLA class I histocompatibility antigen, Cw-6 alpha chain;HLA class I histocompatibility antigen, Cw-12 alpha chain;Putative HLA class I histocompatibility antigen, alpha chain H;HLA class I histocompatibility antigen, A-36 alpha chain;HLA class I histocompatibility antigen, A-23 alpha chain;HLA class I histocompatibility antigen, A-1 alpha…	HLA-C;HLA-A;HLA-H	>tr|E7ERM2|E7ERM2_HUMAN HLA class I histocompatibility antigen, Cw-4 alpha chain OS=Homo sapiens GN=HLA-C PE=3 SV=1;>tr|B0S7Z4|B0S7Z4_HUMAN HLA class I histocompatibility antigen, Cw-4 alpha chain OS=Homo sapiens GN=HLA-C PE=3 SV=1;>tr|B0UY12|B0UY12_HUMAN	78	4	2	0	4	3	1	0	1	2	2	2	3	3	3	3	2	1	1	0	0	0	1	1	1	1	2	1	0	0	0	0	0	0	0	0	0	0	0	0	20.2	12.9
B0UX83;G3V1Z5;P46379-2;P46379;P46379-3;F8VX53;E7EMZ4;F8VXY4;F6TH84;F6S6P2;H0Y4L1;F6UR09;F6U1F2;F6XTU0;H0Y710;F6RG75;F6WML8;F6VEM6;F6X9W3;F6U341;F6TC96;H0Y7K4;H0Y759;H0Y410;H0Y583;H0Y571	B0UX83;G3V1Z5;P46379-2;P46379;P46379-3;F8VX53;E7EMZ4;F8VXY4;F6TH84	14;14;14;14;14;13;13;13;7;6;4;4;4;4;4;4;4;4;4;4;2;1;1;1;1;1	14;14;14;14;14;13;13;13;7;6;4;4;4;4;4;4;4;4;4;4;2;1;1;1;1;1	14;14;14;14;14;13;13;13;7;6;4;4;4;4;4;4;4;4;4;4;2;1;1;1;1;1	Large proline-rich protein BAG6	BAG6	>tr|B0UX83|B0UX83_HUMAN HLA-B associated transcript 3 OS=Homo sapiens GN=BAT3 PE=4 SV=1;>tr|G3V1Z5|G3V1Z5_HUMAN HLA-B associated transcript 3, isoform CRA_c OS=Homo sapiens GN=BAG6 PE=4 SV=1;>sp|P46379-2|BAG6_HUMAN Isoform 2 of Large proline-rich protein B	26	14	14	14	9	7	9	7	6	6	9	7	6	6	5	6	9	7	9	7	6	6	9	7	6	6	5	6	9	7	9	7	6	6	9	7	6	6	5	6	20.2	20.2
B0UZZ8;O15213;Q5HYZ1;H0Y6G3;A2ABB6	B0UZZ8;O15213	6;6;2;2;2	6;6;2;2;2	6;6;2;2;2	WD repeat-containing protein 46	WDR46	>tr|B0UZZ8|B0UZZ8_HUMAN Uncharacterized protein OS=Homo sapiens GN=WDR46 PE=2 SV=1;>sp|O15213|WDR46_HUMAN WD repeat-containing protein 46 OS=Homo sapiens GN=WDR46 PE=1 SV=3	5	6	6	6	4	4	4	2	2	4	2	4	4	5	4	4	4	4	4	2	2	4	2	4	4	5	4	4	4	4	4	2	2	4	2	4	4	5	4	4	14.3	14.3
B0V043;P26640;H0Y4A6;E7EVJ6;Q5SP20;B4DZ61;B0V044;A2ABF4;H0Y3X9;H0Y426	B0V043;P26640;H0Y4A6	15;15;13;6;5;5;4;4;2;1	15;15;13;6;5;5;4;4;2;1	15;15;13;6;5;5;4;4;2;1	Valine--tRNA ligase	VARS	>tr|B0V043|B0V043_HUMAN Valine--tRNA ligase OS=Homo sapiens GN=VARS PE=3 SV=1;>sp|P26640|SYVC_HUMAN Valine--tRNA ligase OS=Homo sapiens GN=VARS PE=1 SV=4;>tr|H0Y4A6|H0Y4A6_HUMAN Valine--tRNA ligase (Fragment) OS=Homo sapiens GN=VARS PE=3 SV=1	10	15	15	15	8	6	8	8	7	9	8	8	11	7	5	12	8	6	8	8	7	9	8	8	11	7	5	12	8	6	8	8	7	9	8	8	11	7	5	12	16.1	16.1
B1AH87;P30536	B1AH87;P30536	1;1	1;1	1;1	Translocator protein	TSPO	>tr|B1AH87|B1AH87_HUMAN Putative peripheral benzodiazepine receptor-related protein (Fragment) OS=Homo sapiens GN=TSPO PE=4 SV=1;>sp|P30536|TSPOA_HUMAN Translocator protein OS=Homo sapiens GN=TSPO PE=1 SV=3	2	1	1	1	1	0	1	0	1	0	1	1	1	0	0	0	1	0	1	0	1	0	1	1	1	0	0	0	1	0	1	0	1	0	1	1	1	0	0	0	21.5	21.5
E7EQY5;B1AHB1;P33992;B1AHB2;B1AHA9;F8WBR1	E7EQY5;B1AHB1;P33992;B1AHB2;B1AHA9;F8WBR1	3;3;3;2;2;2	3;3;3;2;2;2	3;3;3;2;2;2	DNA replication licensing factor MCM5	MCM5	>tr|E7EQY5|E7EQY5_HUMAN DNA replication licensing factor MCM5 OS=Homo sapiens GN=MCM5 PE=3 SV=2;>tr|B1AHB1|B1AHB1_HUMAN DNA replication licensing factor MCM5 OS=Homo sapiens GN=MCM5 PE=3 SV=1;>sp|P33992|MCM5_HUMAN DNA replication licensing factor MCM5 OS=H	6	3	3	3	3	1	3	1	0	0	2	2	0	2	1	2	3	1	3	1	0	0	2	2	0	2	1	2	3	1	3	1	0	0	2	2	0	2	1	2	11.8	11.8
B1AHC7;P12956;B1AHC9;B1AHC8;F5H1I8	B1AHC7;P12956;B1AHC9;B1AHC8;F5H1I8	8;8;7;6;4	8;8;7;6;4	8;8;7;6;4	X-ray repair cross-complementing protein 6	XRCC6	>tr|B1AHC7|B1AHC7_HUMAN X-ray repair complementing defective repair in Chinese hamster cells 6 (Ku autoantigen, 70kDa) OS=Homo sapiens GN=XRCC6 PE=4 SV=1;>sp|P12956|XRCC6_HUMAN X-ray repair cross-complementing protein 6 OS=Homo sapiens GN=XRCC6 PE=1 SV=2;>	5	8	8	8	4	2	5	5	5	3	4	6	3	4	3	5	4	2	5	5	5	3	4	6	3	4	3	5	4	2	5	5	5	3	4	6	3	4	3	5	20.8	20.8
Q9HAF1-2;Q9HAF1;B1AK64;Q9HAF1-3;B1AK63	Q9HAF1-2;Q9HAF1;B1AK64;Q9HAF1-3	6;6;6;6;1	6;6;6;6;1	6;6;6;6;1	Chromatin modification-related protein MEAF6	MEAF6	>sp|Q9HAF1-2|EAF6_HUMAN Isoform 2 of Chromatin modification-related protein MEAF6 OS=Homo sapiens GN=MEAF6;>sp|Q9HAF1|EAF6_HUMAN Chromatin modification-related protein MEAF6 OS=Homo sapiens GN=MEAF6 PE=1 SV=1;>tr|B1AK64|B1AK64_HUMAN Chromatin modification-	5	6	6	6	4	4	4	5	2	4	4	4	2	4	5	4	4	4	4	5	2	4	4	4	2	4	5	4	4	4	4	5	2	4	4	4	2	4	5	4	28.3	28.3
B1AK87;B1AK88;E7EQ40;P47756-2;P47756;F6Q0E3;F6USW4;B1AK85	B1AK87;B1AK88;E7EQ40;P47756-2;P47756;F6Q0E3;F6USW4;B1AK85	2;2;2;2;2;1;1;1	2;2;2;2;2;1;1;1	2;2;2;2;2;1;1;1	F-actin-capping protein subunit beta	CAPZB	>tr|B1AK87|B1AK87_HUMAN Capping protein (Actin filament) muscle Z-line, beta OS=Homo sapiens GN=CAPZB PE=4 SV=1;>tr|B1AK88|B1AK88_HUMAN Capping protein (Actin filament) muscle Z-line, beta OS=Homo sapiens GN=CAPZB PE=4 SV=1;>tr|E7EQ40|E7EQ40_HUMAN F-actin-	8	2	2	2	0	0	0	0	0	0	1	0	1	0	0	0	0	0	0	0	0	0	1	0	1	0	0	0	0	0	0	0	0	0	1	0	1	0	0	0	11.5	11.5
E9PJW9;B1AKJ6;Q96SU4-7;Q96SU4-2;Q96SU4;Q96SU4-6;Q96SU4-3;Q96SU4-5;Q96SU4-4;H0YE19;E9PK98	E9PJW9;B1AKJ6;Q96SU4-7;Q96SU4-2;Q96SU4;Q96SU4-6;Q96SU4-3;Q96SU4-5;Q96SU4-4	10;10;10;10;10;10;9;8;8;2;1	10;10;10;10;10;10;9;8;8;2;1	10;10;10;10;10;10;9;8;8;2;1	Oxysterol-binding protein;Oxysterol-binding protein-related protein 9	OSBPL9	>tr|E9PJW9|E9PJW9_HUMAN Oxysterol-binding protein OS=Homo sapiens GN=OSBPL9 PE=3 SV=1;>tr|B1AKJ6|B1AKJ6_HUMAN Oxysterol-binding protein OS=Homo sapiens GN=OSBPL9 PE=2 SV=1;>sp|Q96SU4-7|OSBL9_HUMAN Isoform 7 of Oxysterol-binding protein-related protein 9 OS	11	10	10	10	5	8	8	7	7	8	8	9	7	4	3	5	5	8	8	7	7	8	8	9	7	4	3	5	5	8	8	7	7	8	8	9	7	4	3	5	17.4	17.4
Q9NRA8-2;B1AKL3;Q9NRA8;B4DR76;B1AKL4;B0QYZ7	Q9NRA8-2;B1AKL3;Q9NRA8;B4DR76;B1AKL4	8;8;8;7;7;1	8;8;8;7;7;1	8;8;8;7;7;1	Eukaryotic translation initiation factor 4E transporter	EIF4ENIF1	>sp|Q9NRA8-2|4ET_HUMAN Isoform 2 of Eukaryotic translation initiation factor 4E transporter OS=Homo sapiens GN=EIF4ENIF1;>tr|B1AKL3|B1AKL3_HUMAN Eukaryotic translation initiation factor 4E nuclear import factor 1 OS=Homo sapiens GN=EIF4ENIF1 PE=4 SV=1;>sp|	6	8	8	8	3	3	6	3	5	4	6	1	1	2	2	5	3	3	6	3	5	4	6	1	1	2	2	5	3	3	6	3	5	4	6	1	1	2	2	5	14.8	14.8
B1AL00;P18075;H0Y4B5;B1AKZ9;B4DUF7;H0YFR7;P22004	B1AL00;P18075;H0Y4B5;B1AKZ9	4;4;3;2;1;1;1	3;3;2;2;0;0;0	3;3;2;2;0;0;0	Bone morphogenetic protein 7	BMP7	>tr|B1AL00|B1AL00_HUMAN Bone morphogenetic protein 7 OS=Homo sapiens GN=BMP7 PE=3 SV=1;>sp|P18075|BMP7_HUMAN Bone morphogenetic protein 7 OS=Homo sapiens GN=BMP7 PE=1 SV=1;>tr|H0Y4B5|H0Y4B5_HUMAN Bone morphogenetic protein 7 (Fragment) OS=Homo sapiens GN=B	7	4	3	3	1	0	0	1	2	0	1	2	0	1	0	1	1	0	0	1	1	0	0	1	0	1	0	0	1	0	0	1	1	0	0	1	0	1	0	0	10.2	8
B1AL16;Q8IX21;B1AL17	B1AL16;Q8IX21;B1AL17	2;2;2	2;2;2	2;2;2	Protein FAM178A	FAM178A	>tr|B1AL16|B1AL16_HUMAN Family with sequence similarity 178, member A OS=Homo sapiens GN=FAM178A PE=4 SV=1;>sp|Q8IX21|F178A_HUMAN Protein FAM178A OS=Homo sapiens GN=FAM178A PE=1 SV=2;>tr|B1AL17|B1AL17_HUMAN Family with sequence similarity 178, member A OS=	3	2	2	2	1	1	1	0	1	2	2	2	1	1	1	1	1	1	1	0	1	2	2	2	1	1	1	1	1	1	1	0	1	2	2	2	1	1	1	1	3.7	3.7
B1ALK7;Q14155-1;B7Z6G2;Q14155-5;Q14155-6;Q14155-2;Q14155-3;Q14155;E7EUY6;H0YFH7;E9PDQ5;E7EU80;C9JDI6;B1ANY6;E7ENL8;C9JAD7;B7Z6D9	B1ALK7;Q14155-1;B7Z6G2;Q14155-5;Q14155-6;Q14155-2;Q14155-3;Q14155;E7EUY6;H0YFH7;E9PDQ5	25;25;24;24;22;21;21;21;19;18;15;6;5;5;4;3;3	25;25;24;24;22;21;21;21;19;18;15;6;5;5;4;3;3	21;21;20;20;18;17;17;17;17;16;13;4;3;3;2;3;3	Rho guanine nucleotide exchange factor 7	ARHGEF7	>tr|B1ALK7|B1ALK7_HUMAN Rho guanine nucleotide exchange factor (GEF) 7 OS=Homo sapiens GN=ARHGEF7 PE=4 SV=1;>sp|Q14155-1|ARHG7_HUMAN Isoform 1 of Rho guanine nucleotide exchange factor 7 OS=Homo sapiens GN=ARHGEF7;>tr|B7Z6G2|B7Z6G2_HUMAN Rho guanine nucleo	17	25	25	21	19	24	23	21	19	19	20	20	18	21	19	21	19	24	23	21	19	19	20	20	18	21	19	21	16	20	20	18	16	16	17	17	15	18	16	17	47.1	47.1
B1ALU1;B1ALU3;O95490-2;O95490-5;O95490;O95490-7;O95490-6;H0Y5C0;O95490-3;O95490-4;H0Y3V3;O94910-2;O94910	B1ALU1;B1ALU3;O95490-2;O95490-5;O95490;O95490-7;O95490-6;H0Y5C0;O95490-3;O95490-4	12;12;12;12;12;12;12;11;10;10;2;1;1	12;12;12;12;12;12;12;11;10;10;2;1;1	12;12;12;12;12;12;12;11;10;10;2;1;1	Latrophilin-2	LPHN2	>tr|B1ALU1|B1ALU1_HUMAN Latrophilin 2 OS=Homo sapiens GN=LPHN2 PE=3 SV=1;>tr|B1ALU3|B1ALU3_HUMAN Latrophilin 2 OS=Homo sapiens GN=LPHN2 PE=3 SV=1;>sp|O95490-2|LPHN2_HUMAN Isoform 2 of Latrophilin-2 OS=Homo sapiens GN=LPHN2;>sp|O95490-5|LPHN2_HUMAN Isoform	13	12	12	12	6	7	8	4	8	6	7	10	6	7	7	5	6	7	8	4	8	6	7	10	6	7	7	5	6	7	8	4	8	6	7	10	6	7	7	5	11.6	11.6
B1AMB1;B1AMB2;Q9BPZ7-5;Q9BPZ7-6;Q9BPZ7-3;Q9BPZ7-2;Q9BPZ7	B1AMB1;B1AMB2;Q9BPZ7-5;Q9BPZ7-6;Q9BPZ7-3;Q9BPZ7-2;Q9BPZ7	1;1;1;1;1;1;1	1;1;1;1;1;1;1	1;1;1;1;1;1;1	Target of rapamycin complex 2 subunit MAPKAP1	MAPKAP1	>tr|B1AMB1|B1AMB1_HUMAN Mitogen-activated protein kinase associated protein 1 (Fragment) OS=Homo sapiens GN=MAPKAP1 PE=4 SV=1;>tr|B1AMB2|B1AMB2_HUMAN Mitogen-activated protein kinase associated protein 1 (Fragment) OS=Homo sapiens GN=MAPKAP1 PE=4 SV=1;>sp|	7	1	1	1	1	1	1	1	1	0	0	0	0	1	1	0	1	1	1	1	1	0	0	0	0	1	1	0	1	1	1	1	1	0	0	0	0	1	1	0	15.1	15.1
B1ANR0;Q13310-2;Q13310;Q13310-3;H0Y5F5;B1ANR1;H0YCC8;H0YEU6;H0YER0;H0Y6X6	B1ANR0;Q13310-2;Q13310;Q13310-3;H0Y5F5	17;17;17;17;13;5;5;5;2;2	9;9;9;9;8;1;3;4;1;1	9;9;9;9;8;1;3;4;1;1	Polyadenylate-binding protein 4	PABPC4	>tr|B1ANR0|B1ANR0_HUMAN Poly(A) binding protein, cytoplasmic 4 (Inducible form) OS=Homo sapiens GN=PABPC4 PE=4 SV=1;>sp|Q13310-2|PABP4_HUMAN Isoform 2 of Polyadenylate-binding protein 4 OS=Homo sapiens GN=PABPC4;>sp|Q13310|PABP4_HUMAN Polyadenylate-binding	10	17	9	9	12	8	15	13	10	10	11	9	9	7	8	12	6	4	9	7	4	4	6	4	3	2	3	6	6	4	9	7	4	4	6	4	3	2	3	6	33.2	17.9
B1APY4;Q01974	B1APY4;Q01974	1;1	1;1	1;1	Tyrosine-protein kinase transmembrane receptor ROR2	ROR2	>tr|B1APY4|B1APY4_HUMAN Receptor tyrosine kinase-like orphan receptor 2 OS=Homo sapiens GN=ROR2 PE=4 SV=1;>sp|Q01974|ROR2_HUMAN Tyrosine-protein kinase transmembrane receptor ROR2 OS=Homo sapiens GN=ROR2 PE=1 SV=2	2	1	1	1	1	1	1	1	1	1	1	1	1	1	1	1	1	1	1	1	1	1	1	1	1	1	1	1	1	1	1	1	1	1	1	1	1	1	1	1	1.1	1.1
B1PS43;Q3MIV8;P35749-3;P35749;P35749-2	B1PS43;Q3MIV8;P35749-3;P35749;P35749-2	8;8;8;8;8	1;1;1;1;1	1;1;1;1;1	Myosin-11	MYH11	>tr|B1PS43|B1PS43_HUMAN Myosin heavy chain 11 smooth muscle isoform OS=Homo sapiens GN=MYH11 PE=2 SV=1;>tr|Q3MIV8|Q3MIV8_HUMAN Myosin, heavy chain 11, smooth muscle OS=Homo sapiens GN=MYH11 PE=2 SV=1;>sp|P35749-3|MYH11_HUMAN Isoform 3 of Myosin-11 OS=Homo	5	8	1	1	2	2	3	8	1	1	2	3	1	2	2	6	1	0	1	1	1	1	1	1	1	1	1	1	1	0	1	1	1	1	1	1	1	1	1	1	5.4	0.5
B2CI53;D3K174;E9PDL9;B5M453;Q9Y6M7-3;F8W7E6;H7C3C4;Q9Y6M7-5	B2CI53;D3K174;E9PDL9;B5M453;Q9Y6M7-3;F8W7E6;H7C3C4;Q9Y6M7-5	34;34;33;33;26;19;19;19	34;34;33;33;26;19;19;19	2;2;2;2;1;2;2;2	Sodium bicarbonate cotransporter 3	SLC4A7	>tr|B2CI53|B2CI53_HUMAN Sodium bicarbonate cotransporter 3 OS=Homo sapiens GN=SLC4A7 PE=2 SV=1;>tr|D3K174|D3K174_HUMAN Sodium bicarbonate cotransporter 3 OS=Homo sapiens GN=SLC4A7 PE=2 SV=1;>tr|E9PDL9|E9PDL9_HUMAN Sodium bicarbonate cotransporter 3 OS=Homo	8	34	34	2	29	32	30	31	27	30	29	31	29	31	32	32	29	32	30	31	27	30	29	31	29	31	32	32	2	2	2	2	2	2	2	2	2	2	2	2	37.9	37.9
G3V576;G3V4W0;B4DY08;G3V4C1;B2R603;G3V2Q1;P07910-2;P07910;G3V555;G3V575;P07910-4;G3V5X6;G3V3K6;G3V251;B4DSU6;G3V4M8;P07910-3;G3V2H6;Q569J8;G3V5V7;G8JL89;G3V2D6;O60812	G3V576;G3V4W0;B4DY08;G3V4C1;B2R603;G3V2Q1;P07910-2;P07910;G3V555;G3V575;P07910-4;G3V5X6;G3V3K6;G3V251;B4DSU6;G3V4M8;P07910-3	6;6;6;6;6;6;6;6;5;5;5;4;4;4;4;3;3;2;2;2;2;2;2	6;6;6;6;6;6;6;6;5;5;5;4;4;4;4;3;3;2;2;2;2;2;2	6;6;6;6;6;6;6;6;5;5;5;4;4;4;4;3;3;2;2;2;2;2;2	Heterogeneous nuclear ribonucleoproteins C1/C2	HNRNPC	>tr|G3V576|G3V576_HUMAN Heterogeneous nuclear ribonucleoproteins C1/C2 OS=Homo sapiens GN=HNRNPC PE=4 SV=1;>tr|G3V4W0|G3V4W0_HUMAN Heterogeneous nuclear ribonucleoproteins C1/C2 (Fragment) OS=Homo sapiens GN=HNRNPC PE=4 SV=1;>tr|B4DY08|B4DY08_HUMAN Heterog	23	6	6	6	6	5	5	6	4	5	4	4	5	4	3	5	6	5	5	6	4	5	4	4	5	4	3	5	6	5	5	6	4	5	4	4	5	4	3	5	29.4	29.4
B2RAX6;Q9Y5J1	B2RAX6;Q9Y5J1	2;2	2;2	2;2	U3 small nucleolar RNA-associated protein 18 homolog	UTP18	>tr|B2RAX6|B2RAX6_HUMAN U3 small nucleolar RNA-associated protein 18 homolog OS=Homo sapiens GN=UTP18 PE=2 SV=1;>sp|Q9Y5J1|UTP18_HUMAN U3 small nucleolar RNA-associated protein 18 homolog OS=Homo sapiens GN=UTP18 PE=1 SV=3	2	2	2	2	1	0	1	1	1	2	1	1	2	1	0	1	1	0	1	1	1	2	1	1	2	1	0	1	1	0	1	1	1	2	1	1	2	1	0	1	5	5
H0YHD0;B2RD65;Q5PSV4	H0YHD0;B2RD65;Q5PSV4	3;3;3	3;3;3	3;3;3	Breast cancer metastasis-suppressor 1-like protein	BRMS1L	>tr|H0YHD0|H0YHD0_HUMAN Breast cancer metastasis-suppressor 1-like protein (Fragment) OS=Homo sapiens GN=BRMS1L PE=4 SV=1;>tr|B2RD65|B2RD65_HUMAN Breast cancer metastasis-suppressor 1-like protein OS=Homo sapiens GN=BRMS1L PE=2 SV=1;>sp|Q5PSV4|BRM1L_HUMAN	3	3	3	3	2	2	0	1	0	1	2	1	2	1	1	2	2	2	0	1	0	1	2	1	2	1	1	2	2	2	0	1	0	1	2	1	2	1	1	2	15.3	15.3
Q86UY0;B2RDM2;Q8NBS9	Q86UY0;B2RDM2;Q8NBS9	3;3;3	3;3;3	3;3;3	Thioredoxin domain-containing protein 5	TXNDC5	>tr|Q86UY0|Q86UY0_HUMAN TXNDC5 protein OS=Homo sapiens GN=TXNDC5 PE=2 SV=1;>tr|B2RDM2|B2RDM2_HUMAN HCG1811539, isoform CRA_b OS=Homo sapiens GN=TXNDC5 PE=2 SV=1;>sp|Q8NBS9|TXND5_HUMAN Thioredoxin domain-containing protein 5 OS=Homo sapiens GN=TXNDC5 PE=1 S	3	3	3	3	1	1	0	0	1	0	1	3	0	0	2	0	1	1	0	0	1	0	1	3	0	0	2	0	1	1	0	0	1	0	1	3	0	0	2	0	7.5	7.5
B2RTR6;Q96RV3-2;Q96RV3-3;Q96RV3	B2RTR6;Q96RV3-2;Q96RV3-3;Q96RV3	3;2;2;2	3;2;2;2	3;2;2;2	Pecanex-like protein 1	PCNX	>tr|B2RTR6|B2RTR6_HUMAN PCNX protein OS=Homo sapiens GN=PCNX PE=2 SV=1;>sp|Q96RV3-2|PCX1_HUMAN Isoform 2 of Pecanex-like protein 1 OS=Homo sapiens GN=PCNX;>sp|Q96RV3-3|PCX1_HUMAN Isoform 3 of Pecanex-like protein 1 OS=Homo sapiens GN=PCNX;>sp|Q96RV3|PCX1_H	4	3	3	3	2	2	3	1	1	1	2	1	1	1	2	1	2	2	3	1	1	1	2	1	1	1	2	1	2	2	3	1	1	1	2	1	1	1	2	1	2.2	2.2
B2WTI4;Q6NYC1-2;Q6NYC1;Q6NYC1-3	B2WTI4;Q6NYC1-2;Q6NYC1;Q6NYC1-3	11;11;11;11	11;11;11;11	11;11;11;11	Bifunctional arginine demethylase and lysyl-hydroxylase JMJD6	JMJD6	>tr|B2WTI4|B2WTI4_HUMAN Bifunctional arginine demethylase and lysyl-hydroxylase JMJD6 OS=Homo sapiens GN=JMJD6 PE=2 SV=1;>sp|Q6NYC1-2|JMJD6_HUMAN Isoform 2 of Bifunctional arginine demethylase and lysyl-hydroxylase JMJD6 OS=Homo sapiens GN=JMJD6;>sp|Q6NYC1	4	11	11	11	4	3	6	3	4	3	5	6	6	4	5	6	4	3	6	3	4	3	5	6	6	4	5	6	4	3	6	3	4	3	5	6	6	4	5	6	37.4	37.4
H0YHC3;F8W020;F8W118;F8VXI6;F8VUX1;F8VY35;B3KV44;F8VV59;B7Z9C2;F8W0J6;F5H4R6;H0YIV4;B3KNT8;P55209;F8VRJ2;F5H1X5;H0YH88;F8W543	H0YHC3;F8W020;F8W118;F8VXI6;F8VUX1;F8VY35;B3KV44;F8VV59;B7Z9C2;F8W0J6;F5H4R6;H0YIV4;B3KNT8;P55209;F8VRJ2;F5H1X5;H0YH88;F8W543	2;2;2;2;2;2;2;2;2;2;2;2;2;2;1;1;1;1	2;2;2;2;2;2;2;2;2;2;2;2;2;2;1;1;1;1	2;2;2;2;2;2;2;2;2;2;2;2;2;2;1;1;1;1	Nucleosome assembly protein 1-like 1	NAP1L1	>tr|H0YHC3|H0YHC3_HUMAN Nucleosome assembly protein 1-like 1 (Fragment) OS=Homo sapiens GN=NAP1L1 PE=3 SV=1;>tr|F8W020|F8W020_HUMAN Nucleosome assembly protein 1-like 1 (Fragment) OS=Homo sapiens GN=NAP1L1 PE=3 SV=1;>tr|F8W118|F8W118_HUMAN Nucleosome assem	18	2	2	2	1	1	1	1	1	1	2	1	0	1	0	1	1	1	1	1	1	1	2	1	0	1	0	1	1	1	1	1	1	1	2	1	0	1	0	1	14.1	14.1
F5H5I6;B3KP14;H0Y8R1;H0YAK1;Q12849-5;Q12849;H0YAM1	F5H5I6;B3KP14;H0Y8R1;H0YAK1;Q12849-5;Q12849	9;9;9;9;9;9;1	9;9;9;9;9;9;1	9;9;9;9;9;9;1	G-rich sequence factor 1	GRSF1	>tr|F5H5I6|F5H5I6_HUMAN G-rich sequence factor 1 OS=Homo sapiens GN=GRSF1 PE=4 SV=1;>tr|B3KP14|B3KP14_HUMAN G-rich sequence factor 1 OS=Homo sapiens GN=GRSF1 PE=2 SV=1;>tr|H0Y8R1|H0Y8R1_HUMAN G-rich sequence factor 1 (Fragment) OS=Homo sapiens GN=GRSF1 PE=	7	9	9	9	5	6	5	6	6	5	6	7	6	6	6	7	5	6	5	6	6	5	6	7	6	6	6	7	5	6	5	6	6	5	6	7	6	6	6	7	35.6	35.6
B3KPJ4;Q8IXK0-2;Q8IXK0-4;Q8IXK0;Q8IXK0-5;C9J3D2;Q8IXK0-3;H3BLT6;H7C528	B3KPJ4;Q8IXK0-2;Q8IXK0-4;Q8IXK0;Q8IXK0-5;C9J3D2;Q8IXK0-3;H3BLT6	6;6;6;6;6;5;5;3;1	5;5;5;5;5;5;5;2;0	5;5;5;5;5;5;5;2;0	Polyhomeotic-like protein 2	PHC2	>tr|B3KPJ4|B3KPJ4_HUMAN Polyhomeotic-like protein 2 OS=Homo sapiens GN=PHC2 PE=2 SV=1;>sp|Q8IXK0-2|PHC2_HUMAN Isoform 2 of Polyhomeotic-like protein 2 OS=Homo sapiens GN=PHC2;>sp|Q8IXK0-4|PHC2_HUMAN Isoform 4 of Polyhomeotic-like protein 2 OS=Homo sapiens	9	6	5	5	1	3	4	2	4	5	4	5	2	3	4	4	1	3	3	2	3	4	3	4	2	2	3	3	1	3	3	2	3	4	3	4	2	2	3	3	14.2	11.4
B3KQ25;P61289;P61289-2	B3KQ25;P61289;P61289-2	1;1;1	1;1;1	1;1;1	Proteasome activator complex subunit 3	PSME3	>tr|B3KQ25|B3KQ25_HUMAN Proteasome activator complex subunit 3 OS=Homo sapiens GN=PSME3 PE=2 SV=1;>sp|P61289|PSME3_HUMAN Proteasome activator complex subunit 3 OS=Homo sapiens GN=PSME3 PE=1 SV=1;>sp|P61289-2|PSME3_HUMAN Isoform 2 of Proteasome activator co	3	1	1	1	0	0	1	0	0	0	0	0	0	0	0	0	0	0	1	0	0	0	0	0	0	0	0	0	0	0	1	0	0	0	0	0	0	0	0	0	7.8	7.8
B3KQT9;G5EA52;P30101;F5H119	B3KQT9;G5EA52;P30101;F5H119	16;16;16;11	16;16;16;11	13;13;13;11	Protein disulfide-isomerase;Protein disulfide-isomerase A3	PDIA3	>tr|B3KQT9|B3KQT9_HUMAN Protein disulfide-isomerase A3 OS=Homo sapiens GN=PDIA3 PE=2 SV=1;>tr|G5EA52|G5EA52_HUMAN Protein disulfide isomerase family A, member 3, isoform CRA_b OS=Homo sapiens GN=PDIA3 PE=3 SV=1;>sp|P30101|PDIA3_HUMAN Protein disulfide-isom	4	16	16	13	9	9	10	6	11	9	14	14	6	8	13	9	9	9	10	6	11	9	14	14	6	8	13	9	7	8	9	5	9	8	11	12	6	7	11	8	36.7	36.7
B3KRL7;Q15714;C9IZ15	B3KRL7;Q15714;C9IZ15	4;4;2	4;4;2	4;4;2	TSC22 domain family protein 1	TSC22D1	>tr|B3KRL7|B3KRL7_HUMAN TSC22 domain family protein 1 OS=Homo sapiens GN=TSC22D1 PE=2 SV=1;>sp|Q15714|T22D1_HUMAN TSC22 domain family protein 1 OS=Homo sapiens GN=TSC22D1 PE=1 SV=3;>tr|C9IZ15|C9IZ15_HUMAN TSC22 domain family protein 1 (Fragment) OS=Homo sa	3	4	4	4	2	1	2	2	3	3	4	3	2	1	1	2	2	1	2	2	3	3	4	3	2	1	1	2	2	1	2	2	3	3	4	3	2	1	1	2	8.6	8.6
B3KRQ0	B3KRQ0	1	1	1	N-alpha-acetyltransferase 60	NAA60	>tr|B3KRQ0|B3KRQ0_HUMAN N-alpha-acetyltransferase 60 OS=Homo sapiens GN=NAA60 PE=2 SV=1	1	1	1	1	1	1	0	0	0	1	0	0	0	0	0	1	1	1	0	0	0	1	0	0	0	0	0	1	1	1	0	0	0	1	0	0	0	0	0	1	4	4
B3KRS5;Q92769;H3BM24;E5RFI6;E5RJ04;E5RGV4;E5RHE7;E5RH52;E5RG37;E5RFP9;E5RK19	B3KRS5;Q92769	11;11;3;2;2;2;2;2;2;2;1	7;7;1;0;0;0;0;0;0;0;0	7;7;1;0;0;0;0;0;0;0;0	Histone deacetylase 2	HDAC2	>tr|B3KRS5|B3KRS5_HUMAN Histone deacetylase OS=Homo sapiens GN=HDAC2 PE=2 SV=1;>sp|Q92769|HDAC2_HUMAN Histone deacetylase 2 OS=Homo sapiens GN=HDAC2 PE=1 SV=2	11	11	7	7	10	10	10	10	10	10	10	10	11	10	10	10	6	6	6	6	6	6	6	6	7	6	6	6	6	6	6	6	6	6	6	6	7	6	6	6	29.3	19.4
B3KSI4;B4E022;P29401;E7EPA7	B3KSI4;B4E022;P29401;E7EPA7	1;1;1;1	1;1;1;1	1;1;1;1	Transketolase	TKT	>tr|B3KSI4|B3KSI4_HUMAN Uncharacterized protein OS=Homo sapiens GN=TKT PE=2 SV=1;>tr|B4E022|B4E022_HUMAN Transketolase OS=Homo sapiens GN=TKT PE=2 SV=1;>sp|P29401|TKT_HUMAN Transketolase OS=Homo sapiens GN=TKT PE=1 SV=3;>tr|E7EPA7|E7EPA7_HUMAN Transketolas	4	1	1	1	0	0	1	0	1	0	1	1	0	1	1	1	0	0	1	0	1	0	1	1	0	1	1	1	0	0	1	0	1	0	1	1	0	1	1	1	2.2	2.2
B3KTM6;P46777;Q5T7N0	B3KTM6;P46777	10;10;2	10;10;2	10;10;2	60S ribosomal protein L5	RPL5	>tr|B3KTM6|B3KTM6_HUMAN 60S ribosomal protein L5 OS=Homo sapiens GN=RPL5 PE=2 SV=1;>sp|P46777|RL5_HUMAN 60S ribosomal protein L5 OS=Homo sapiens GN=RPL5 PE=1 SV=3	3	10	10	10	9	8	8	6	8	6	10	8	9	7	8	7	9	8	8	6	8	6	10	8	9	7	8	7	9	8	8	6	8	6	10	8	9	7	8	7	38.5	38.5
B3KTR6;Q9BRK3;Q9BRK3-2	B3KTR6;Q9BRK3;Q9BRK3-2	9;9;9	9;9;9	9;9;9	Matrix-remodeling-associated protein 8	MXRA8	>tr|B3KTR6|B3KTR6_HUMAN Matrix-remodeling-associated protein 8 OS=Homo sapiens GN=MXRA8 PE=2 SV=1;>sp|Q9BRK3|MXRA8_HUMAN Matrix-remodeling-associated protein 8 OS=Homo sapiens GN=MXRA8 PE=1 SV=1;>sp|Q9BRK3-2|MXRA8_HUMAN Isoform 2 of Matrix-remodeling-assoc	3	9	9	9	8	6	7	6	5	5	4	6	4	5	6	6	8	6	7	6	5	5	4	6	4	5	6	6	8	6	7	6	5	5	4	6	4	5	6	6	22.9	22.9
B3KUS5;Q70CQ3;F5H8D3;F5GXG2;F5H3L3	B3KUS5;Q70CQ3	16;16;6;2;2	16;16;6;2;2	16;16;6;2;2	Ubiquitin carboxyl-terminal hydrolase;Ubiquitin carboxyl-terminal hydrolase 30	USP30	>tr|B3KUS5|B3KUS5_HUMAN Ubiquitin carboxyl-terminal hydrolase OS=Homo sapiens GN=USP30 PE=2 SV=1;>sp|Q70CQ3|UBP30_HUMAN Ubiquitin carboxyl-terminal hydrolase 30 OS=Homo sapiens GN=USP30 PE=1 SV=1	5	16	16	16	13	14	12	13	11	11	13	13	10	11	12	13	13	14	12	13	11	11	13	13	10	11	12	13	13	14	12	13	11	11	13	13	10	11	12	13	46.5	46.5
B3KUX4;F5GYS8;H0YNY8;F8W8U3;O00470;O00470-2;B3KP81;O14770-6;O14770-7;O14770-8;O14770-3;O14770-2;O14770-4;O14770;E9PDC4;E9PBY5;B7Z4T5;H0YLG9;H3BLU4;H0YNA8;A6NDR6;Q99687-3;Q99687;Q99687-2;H0YMX5;B9A066;H0YKE5;H0YKN2;E9PC25;H0YKK4;H0YMV2;H0YK79;O14770-5;A8K0S8	B3KUX4;F5GYS8;H0YNY8;F8W8U3;O00470;O00470-2;B3KP81;O14770-6;O14770-7;O14770-8;O14770-3;O14770-2;O14770-4;O14770;E9PDC4;E9PBY5;B7Z4T5;H0YLG9;H3BLU4;H0YNA8;A6NDR6;Q99687-3;Q99687;Q99687-2	4;4;4;4;4;4;3;3;3;3;3;3;3;3;2;2;2;2;2;2;2;2;2;2;1;1;1;1;1;1;1;1;1;1	4;4;4;4;4;4;3;3;3;3;3;3;3;3;2;2;2;2;2;2;2;2;2;2;1;1;1;1;1;1;1;1;1;1	4;4;4;4;4;4;3;3;3;3;3;3;3;3;2;2;2;2;2;2;2;2;2;2;1;1;1;1;1;1;1;1;1;1	Homeobox protein Meis1;Homeobox protein Meis2;Putative homeobox protein Meis3-like 1;Homeobox protein Meis3	MEIS1;MEIS2;MEIS3;MEIS3P1	>tr|B3KUX4|B3KUX4_HUMAN Homeobox protein Meis1 OS=Homo sapiens GN=MEIS1 PE=2 SV=1;>tr|F5GYS8|F5GYS8_HUMAN Homeobox protein Meis1 OS=Homo sapiens GN=MEIS1 PE=3 SV=1;>tr|H0YNY8|H0YNY8_HUMAN Homeobox protein Meis1 OS=Homo sapiens GN=MEIS1 PE=3 SV=1;>tr|F8W8U3	34	4	4	4	2	1	3	1	2	2	2	4	2	3	2	1	2	1	3	1	2	2	2	4	2	3	2	1	2	1	3	1	2	2	2	4	2	3	2	1	22.9	22.9
F5H263;Q96FL9-2;B3KV89;Q96FL9;Q96FL9-3	F5H263;Q96FL9-2;B3KV89;Q96FL9;Q96FL9-3	4;4;4;4;4	2;2;2;2;2	2;2;2;2;2	Polypeptide N-acetylgalactosaminyltransferase 14	GALNT14	>tr|F5H263|F5H263_HUMAN Polypeptide N-acetylgalactosaminyltransferase 14 OS=Homo sapiens GN=GALNT14 PE=3 SV=1;>sp|Q96FL9-2|GLT14_HUMAN Isoform 2 of Polypeptide N-acetylgalactosaminyltransferase 14 OS=Homo sapiens GN=GALNT14;>tr|B3KV89|B3KV89_HUMAN Polypept	5	4	2	2	1	1	1	1	2	0	0	1	0	0	3	1	1	1	1	1	1	0	0	1	0	0	2	0	1	1	1	1	1	0	0	1	0	0	2	0	10.1	5.2
B3KVK7;P56192;A6NC17;H0YHV5;H0YIC2;F5H2V6	B3KVK7;P56192;A6NC17;H0YHV5	4;4;3;2;1;1	4;4;3;2;1;1	4;4;3;2;1;1	Methionine--tRNA ligase, cytoplasmic	MARS	>tr|B3KVK7|B3KVK7_HUMAN Methionine--tRNA ligase, cytoplasmic OS=Homo sapiens GN=MARS PE=2 SV=1;>sp|P56192|SYMC_HUMAN Methionine--tRNA ligase, cytoplasmic OS=Homo sapiens GN=MARS PE=1 SV=2;>tr|A6NC17|A6NC17_HUMAN Methionine--tRNA ligase, cytoplasmic OS=Homo	6	4	4	4	3	1	1	2	1	2	1	3	2	3	4	4	3	1	1	2	1	2	1	3	2	3	4	4	3	1	1	2	1	2	1	3	2	3	4	4	10.3	10.3
E7ENP4;P14678-2;P63162;P14678;B3KVR1;P14678-3	E7ENP4;P14678-2;P63162;P14678;B3KVR1;P14678-3	10;10;10;10;10;10	10;10;10;10;10;10	10;10;10;10;10;10	Small nuclear ribonucleoprotein-associated proteins B and B;Small nuclear ribonucleoprotein-associated protein N	SNRPB;SNRPN	>tr|E7ENP4|E7ENP4_HUMAN Small nuclear ribonucleoprotein-associated proteins B and B OS=Homo sapiens GN=SNRPB PE=4 SV=2;>sp|P14678-2|RSMB_HUMAN Isoform SM-B of Small nuclear ribonucleoprotein-associated proteins B and B OS=Homo sapiens GN=SNRPB;>sp|P63162	6	10	10	10	8	10	8	8	8	8	8	8	8	8	8	8	8	10	8	8	8	8	8	8	8	8	8	8	8	10	8	8	8	8	8	8	8	8	8	8	24.3	24.3
B3KWT8;Q3KNV8;Q3KNV8-2;C9JYD0;C9J3G7	B3KWT8;Q3KNV8;Q3KNV8-2	3;3;3;1;1	3;3;3;1;1	3;3;3;1;1	Polycomb group RING finger protein 3	PCGF3	>tr|B3KWT8|B3KWT8_HUMAN Polycomb group RING finger protein 3 OS=Homo sapiens GN=PCGF3 PE=2 SV=1;>sp|Q3KNV8|PCGF3_HUMAN Polycomb group RING finger protein 3 OS=Homo sapiens GN=PCGF3 PE=1 SV=1;>sp|Q3KNV8-2|PCGF3_HUMAN Isoform 2 of Polycomb group RING finger	5	3	3	3	1	1	2	1	0	0	1	2	1	0	2	1	1	1	2	1	0	0	1	2	1	0	2	1	1	1	2	1	0	0	1	2	1	0	2	1	17.8	17.8
H0YH08;H7BYT4;G5EA50;B3KXA1;Q6ZN18-3;Q6ZN18-2;Q6ZN18	H0YH08;H7BYT4;G5EA50;B3KXA1;Q6ZN18-3;Q6ZN18-2;Q6ZN18	1;1;1;1;1;1;1	1;1;1;1;1;1;1	1;1;1;1;1;1;1	Zinc finger protein AEBP2	AEBP2	>tr|H0YH08|H0YH08_HUMAN Zinc finger protein AEBP2 (Fragment) OS=Homo sapiens GN=AEBP2 PE=4 SV=1;>tr|H7BYT4|H7BYT4_HUMAN Zinc finger protein AEBP2 (Fragment) OS=Homo sapiens GN=AEBP2 PE=4 SV=1;>tr|G5EA50|G5EA50_HUMAN AE binding protein 2, isoform CRA_a OS=H	7	1	1	1	0	1	1	0	1	1	1	1	1	0	0	1	0	1	1	0	1	1	1	1	1	0	0	1	0	1	1	0	1	1	1	1	1	0	0	1	9.2	9.2
F8VZA2;Q6P1Q0;B3KXK7;Q6P1Q0-2;F8VP71;F8VVQ3;B7Z7E4;Q6P1Q0-4;H0YIV5;F8W1Z2;F8VR33;F8VQE7;F8VTR1;F8W0R0;Q6P1Q0-5;H0YHF4;F8VXQ4;F8WCD9;F8W6J0;F8VS60;F8VPY5;Q6P1Q0-6;Q6P1Q0-3	F8VZA2;Q6P1Q0;B3KXK7;Q6P1Q0-2;F8VP71;F8VVQ3;B7Z7E4;Q6P1Q0-4;H0YIV5;F8W1Z2	7;7;7;6;5;5;5;5;4;4;2;2;2;2;2;1;1;1;1;1;1;1;1	7;7;7;6;5;5;5;5;4;4;2;2;2;2;2;1;1;1;1;1;1;1;1	7;7;7;6;5;5;5;5;4;4;2;2;2;2;2;1;1;1;1;1;1;1;1	LETM1 domain-containing protein 1	LETMD1	>tr|F8VZA2|F8VZA2_HUMAN LETM1 domain-containing protein 1 (Fragment) OS=Homo sapiens GN=LETMD1 PE=4 SV=1;>sp|Q6P1Q0|LTMD1_HUMAN LETM1 domain-containing protein 1 OS=Homo sapiens GN=LETMD1 PE=1 SV=1;>tr|B3KXK7|B3KXK7_HUMAN LETM1 domain-containing protein 1	23	7	7	7	3	0	2	1	4	1	2	5	4	2	2	4	3	0	2	1	4	1	2	5	4	2	2	4	3	0	2	1	4	1	2	5	4	2	2	4	26.1	26.1
B3KY56;Q9BSJ8;Q9BSJ8-2;F8VZB1	B3KY56;Q9BSJ8;Q9BSJ8-2	6;6;6;2	6;6;6;2	6;6;6;2	Extended synaptotagmin-1	ESYT1	>tr|B3KY56|B3KY56_HUMAN Extended synaptotagmin-1 OS=Homo sapiens GN=ESYT1 PE=2 SV=1;>sp|Q9BSJ8|ESYT1_HUMAN Extended synaptotagmin-1 OS=Homo sapiens GN=ESYT1 PE=1 SV=1;>sp|Q9BSJ8-2|ESYT1_HUMAN Isoform 2 of Extended synaptotagmin-1 OS=Homo sapiens GN=ESYT1	4	6	6	6	2	2	2	2	3	1	4	5	0	2	3	3	2	2	2	2	3	1	4	5	0	2	3	3	2	2	2	2	3	1	4	5	0	2	3	3	8	8
B3KY83;P19793;P48443	B3KY83;P19793	5;5;2	1;1;0	1;1;0	Retinoic acid receptor RXR-alpha	RXRA	>tr|B3KY83|B3KY83_HUMAN Retinoic acid receptor RXR-alpha OS=Homo sapiens GN=RXRA PE=2 SV=1;>sp|P19793|RXRA_HUMAN Retinoic acid receptor RXR-alpha OS=Homo sapiens GN=RXRA PE=1 SV=1	3	5	1	1	0	2	4	1	2	2	3	2	2	3	1	3	0	0	1	0	0	0	0	0	0	0	0	0	0	0	1	0	0	0	0	0	0	0	0	0	18.6	4.7
B3KY94;H3BTV1;O14735	B3KY94;H3BTV1;O14735	1;1;1	1;1;1	1;1;1	CDP-diacylglycerol--inositol 3-phosphatidyltransferase	CDIPT	>tr|B3KY94|B3KY94_HUMAN CDP-diacylglycerol--inositol 3-phosphatidyltransferase OS=Homo sapiens GN=CDIPT PE=2 SV=1;>tr|H3BTV1|H3BTV1_HUMAN CDP-diacylglycerol--inositol 3-phosphatidyltransferase OS=Homo sapiens GN=CDIPT PE=4 SV=1;>sp|O14735|CDIPT_HUMAN CDP-d	3	1	1	1	1	0	0	0	0	0	0	0	0	1	0	0	1	0	0	0	0	0	0	0	0	1	0	0	1	0	0	0	0	0	0	0	0	1	0	0	5.5	5.5
B4DDF4;B4DUT8;Q99439;E7ENR3;Q99439-2;H3BQH0;H3BVI6;H3BTZ5;H3BQR6	B4DDF4;B4DUT8;Q99439;E7ENR3;Q99439-2;H3BQH0;H3BVI6	5;5;5;4;4;3;3;2;1	5;5;5;4;4;3;3;2;1	4;4;4;3;3;3;3;2;1	Calponin-2	CNN2	>tr|B4DDF4|B4DDF4_HUMAN Calponin-2 OS=Homo sapiens GN=CNN2 PE=2 SV=1;>tr|B4DUT8|B4DUT8_HUMAN Calponin-2 OS=Homo sapiens GN=CNN2 PE=2 SV=1;>sp|Q99439|CNN2_HUMAN Calponin-2 OS=Homo sapiens GN=CNN2 PE=1 SV=4;>tr|E7ENR3|E7ENR3_HUMAN Calponin-2 OS=Homo sapiens	9	5	5	4	3	3	5	4	4	4	4	5	3	2	3	3	3	3	5	4	4	4	4	5	3	2	3	3	2	2	4	3	3	3	3	4	2	1	2	2	19.8	19.8
E9PH38;F5H3X9;B4DDF7;P30153;B4E1Q0	E9PH38;F5H3X9;B4DDF7;P30153;B4E1Q0	5;5;5;5;3	5;5;5;5;3	5;5;5;5;3	Serine/threonine-protein phosphatase 2A 65 kDa regulatory subunit A alpha isoform	PPP2R1A	>tr|E9PH38|E9PH38_HUMAN Serine/threonine-protein phosphatase 2A 65 kDa regulatory subunit A alpha isoform OS=Homo sapiens GN=PPP2R1A PE=4 SV=1;>tr|F5H3X9|F5H3X9_HUMAN Serine/threonine-protein phosphatase 2A 65 kDa regulatory subunit A alpha isoform OS=Homo	5	5	5	5	4	3	3	4	5	3	4	3	0	1	2	3	4	3	3	4	5	3	4	3	0	1	2	3	4	3	3	4	5	3	4	3	0	1	2	3	13.8	13.8
B4DDK9;Q10469	B4DDK9;Q10469	4;4	4;4	4;4	Alpha-1,6-mannosyl-glycoprotein 2-beta-N-acetylglucosaminyltransferase	MGAT2	>tr|B4DDK9|B4DDK9_HUMAN Alpha-1,6-mannosyl-glycoprotein 2-beta-N-acetylglucosaminyltransferase OS=Homo sapiens GN=MGAT2 PE=2 SV=1;>sp|Q10469|MGAT2_HUMAN Alpha-1,6-mannosyl-glycoprotein 2-beta-N-acetylglucosaminyltransferase OS=Homo sapiens GN=MGAT2 PE=1 SV	2	4	4	4	1	2	0	1	2	3	2	2	2	1	2	0	1	2	0	1	2	3	2	2	2	1	2	0	1	2	0	1	2	3	2	2	2	1	2	0	12.1	12.1
F8W9D1;F8VYY9;B4DDT7;P54619;H0YIC9;H0YHF8;F8VPF5;F8VVA3;F8VZX1;F8VSL2;G8JLM0;E9PGP6;Q9UGJ0-2;Q9UGJ0-3;Q9UGJ0	F8W9D1;F8VYY9;B4DDT7;P54619;H0YIC9	8;8;8;8;4;3;3;3;2;1;1;1;1;1;1	8;8;8;8;4;3;3;3;2;1;1;1;1;1;1	8;8;8;8;4;3;3;3;2;1;1;1;1;1;1	5-AMP-activated protein kinase subunit gamma-1	PRKAG1	>tr|F8W9D1|F8W9D1_HUMAN 5-AMP-activated protein kinase subunit gamma-1 OS=Homo sapiens GN=PRKAG1 PE=4 SV=1;>tr|F8VYY9|F8VYY9_HUMAN 5-AMP-activated protein kinase subunit gamma-1 OS=Homo sapiens GN=PRKAG1 PE=4 SV=1;>tr|B4DDT7|B4DDT7_HUMAN 5-AMP-activated	15	8	8	8	4	4	6	4	4	2	4	4	2	3	4	5	4	4	6	4	4	2	4	4	2	3	4	5	4	4	6	4	4	2	4	4	2	3	4	5	38.5	38.5
G3V2G6;G3V234;B4DDW0;Q8TC12	G3V2G6;G3V234;B4DDW0;Q8TC12	1;1;1;1	1;1;1;1	1;1;1;1	Retinol dehydrogenase 11	RDH11	>tr|G3V2G6|G3V2G6_HUMAN Retinol dehydrogenase 11 (Fragment) OS=Homo sapiens GN=RDH11 PE=4 SV=1;>tr|G3V234|G3V234_HUMAN Retinol dehydrogenase 11 (Fragment) OS=Homo sapiens GN=RDH11 PE=3 SV=1;>tr|B4DDW0|B4DDW0_HUMAN Retinol dehydrogenase 11 OS=Homo sapiens G	4	1	1	1	0	0	0	0	1	1	1	1	0	0	1	0	0	0	0	0	1	1	1	1	0	0	1	0	0	0	0	0	1	1	1	1	0	0	1	0	7.3	7.3
B4DEB1;Q71DI3;Q16695;P84243;P68431;Q6NXT2	B4DEB1;Q71DI3;Q16695;P84243;P68431;Q6NXT2	3;3;3;3;3;2	3;3;3;3;3;2	1;1;1;1;1;0	Histone H3;Histone H3.2;Histone H3.1t;Histone H3.3;Histone H3.1;Histone H3.3C	H3F3A;HIST2H3A;HIST3H3;HIST1H3A;H3F3C	>tr|B4DEB1|B4DEB1_HUMAN Histone H3 OS=Homo sapiens GN=H3F3A PE=2 SV=1;>sp|Q71DI3|H32_HUMAN Histone H3.2 OS=Homo sapiens GN=HIST2H3A PE=1 SV=3;>sp|Q16695|H31T_HUMAN Histone H3.1t OS=Homo sapiens GN=HIST3H3 PE=1 SV=3;>sp|P84243|H33_HUMAN Histone H3.3 OS=Homo	6	3	3	1	2	3	2	3	2	2	3	2	3	2	2	2	2	3	2	3	2	2	3	2	3	2	2	2	0	1	0	1	0	0	1	0	1	0	0	0	22	22
B8ZZQ4;B4DF73;Q96EY7	B8ZZQ4;B4DF73;Q96EY7	1;1;1	1;1;1	1;1;1	Pentatricopeptide repeat domain-containing protein 3, mitochondrial	PTCD3	>tr|B8ZZQ4|B8ZZQ4_HUMAN Pentatricopeptide repeat-containing protein 3, mitochondrial (Fragment) OS=Homo sapiens GN=PTCD3 PE=4 SV=2;>tr|B4DF73|B4DF73_HUMAN Pentatricopeptide repeat-containing protein 3, mitochondrial OS=Homo sapiens GN=PTCD3 PE=2 SV=1;>sp|Q	3	1	1	1	0	1	1	0	0	0	0	0	0	0	0	1	0	1	1	0	0	0	0	0	0	0	0	1	0	1	1	0	0	0	0	0	0	0	0	1	7.3	7.3
B4DFJ1;Q9BSI4-2;Q9BSI4;Q86TZ8;H0YKA6;H0YMN3;H0YLC9;H0YL20;H0YKG7;Q9BSI4-3	B4DFJ1;Q9BSI4-2;Q9BSI4;Q86TZ8;H0YKA6	3;3;3;2;2;1;1;1;1;1	3;3;3;2;2;1;1;1;1;1	3;3;3;2;2;1;1;1;1;1	TERF1-interacting nuclear factor 2	TINF2	>tr|B4DFJ1|B4DFJ1_HUMAN TERF1-interacting nuclear factor 2 OS=Homo sapiens GN=TINF2 PE=2 SV=1;>sp|Q9BSI4-2|TINF2_HUMAN Isoform 2 of TERF1-interacting nuclear factor 2 OS=Homo sapiens GN=TINF2;>sp|Q9BSI4|TINF2_HUMAN TERF1-interacting nuclear factor 2 OS=Hom	10	3	3	3	2	2	2	1	2	1	2	3	1	1	2	1	2	2	2	1	2	1	2	3	1	1	2	1	2	2	2	1	2	1	2	3	1	1	2	1	7.7	7.7
B4DGM4;Q9NX70	B4DGM4;Q9NX70	2;2	2;2	2;2	Mediator of RNA polymerase II transcription subunit 29	MED29	>tr|B4DGM4|B4DGM4_HUMAN Mediator of RNA polymerase II transcription subunit 29 OS=Homo sapiens GN=MED29 PE=2 SV=1;>sp|Q9NX70|MED29_HUMAN Mediator of RNA polymerase II transcription subunit 29 OS=Homo sapiens GN=MED29 PE=1 SV=1	2	2	2	2	1	1	0	0	0	0	0	0	0	0	0	1	1	1	0	0	0	0	0	0	0	0	0	1	1	1	0	0	0	0	0	0	0	0	0	1	18	18
B4DGU4;P35222	B4DGU4;P35222	16;16	11;11	11;11	Catenin beta-1	CTNNB1	>tr|B4DGU4|B4DGU4_HUMAN Catenin beta-1 OS=Homo sapiens GN=CTNNB1 PE=2 SV=1;>sp|P35222|CTNB1_HUMAN Catenin beta-1 OS=Homo sapiens GN=CTNNB1 PE=1 SV=1	2	16	11	11	14	10	13	13	8	6	9	10	8	6	10	14	9	6	8	8	4	3	5	5	4	2	5	9	9	6	8	8	4	3	5	5	4	2	5	9	26.4	19.3
B4DGX2;P48426;H7BXS3;P78356;Q5JUT3;E9PCB2	B4DGX2;P48426;H7BXS3;P78356	3;3;2;2;1;1	3;3;2;2;1;1	3;3;2;2;1;1	Phosphatidylinositol 5-phosphate 4-kinase type-2 alpha;Phosphatidylinositol 5-phosphate 4-kinase type-2 beta	PIP4K2A;PIP4K2B	>tr|B4DGX2|B4DGX2_HUMAN Phosphatidylinositol 5-phosphate 4-kinase type-2 alpha OS=Homo sapiens GN=PIP4K2A PE=2 SV=1;>sp|P48426|PI42A_HUMAN Phosphatidylinositol 5-phosphate 4-kinase type-2 alpha OS=Homo sapiens GN=PIP4K2A PE=1 SV=2;>tr|H7BXS3|H7BXS3_HUMAN P	6	3	3	3	0	0	1	1	1	0	1	3	0	0	0	1	0	0	1	1	1	0	1	3	0	0	0	1	0	0	1	1	1	0	1	3	0	0	0	1	11.5	11.5
F5H4I0;E9PEX6;B4DHG0;B4DT69;P09622	F5H4I0;E9PEX6;B4DHG0;B4DT69;P09622	2;2;2;2;2	2;2;2;2;2	2;2;2;2;2	Dihydrolipoyl dehydrogenase, mitochondrial	DLD	>tr|F5H4I0|F5H4I0_HUMAN Dihydrolipoyl dehydrogenase OS=Homo sapiens GN=DLD PE=3 SV=1;>tr|E9PEX6|E9PEX6_HUMAN Dihydrolipoyl dehydrogenase, mitochondrial OS=Homo sapiens GN=DLD PE=4 SV=1;>tr|B4DHG0|B4DHG0_HUMAN Dihydrolipoyl dehydrogenase, mitochondrial OS=H	5	2	2	2	1	0	1	0	2	1	1	2	0	0	1	0	1	0	1	0	2	1	1	2	0	0	1	0	1	0	1	0	2	1	1	2	0	0	1	0	5.2	5.2
B4DHM5;E7ERH5;B4E1H9;B7Z7A9;P00558	B4DHM5;E7ERH5;B4E1H9;B7Z7A9;P00558	1;1;1;1;1	1;1;1;1;1	1;1;1;1;1	Phosphoglycerate kinase;Phosphoglycerate kinase 1	PGK1	>tr|B4DHM5|B4DHM5_HUMAN Phosphoglycerate kinase OS=Homo sapiens GN=PGK1 PE=2 SV=1;>tr|E7ERH5|E7ERH5_HUMAN Phosphoglycerate kinase OS=Homo sapiens GN=PGK1 PE=3 SV=1;>tr|B4E1H9|B4E1H9_HUMAN Phosphoglycerate kinase OS=Homo sapiens GN=PGK1 PE=2 SV=1;>tr|B7Z7A9	5	1	1	1	1	0	0	0	0	1	1	0	0	1	1	0	1	0	0	0	0	1	1	0	0	1	1	0	1	0	0	0	0	1	1	0	0	1	1	0	7.4	7.4
B4DHW1;Q9HC07	B4DHW1;Q9HC07	2;2	2;2	2;2	Transmembrane protein 165	TMEM165	>tr|B4DHW1|B4DHW1_HUMAN Uncharacterized protein OS=Homo sapiens GN=TMEM165 PE=2 SV=1;>sp|Q9HC07|TM165_HUMAN Transmembrane protein 165 OS=Homo sapiens GN=TMEM165 PE=1 SV=1	2	2	2	2	0	1	1	0	1	0	0	2	0	0	1	0	0	1	1	0	1	0	0	2	0	0	1	0	0	1	1	0	1	0	0	2	0	0	1	0	11.9	11.9
B7Z7G2;P22570;P22570-2;E7EQC1;B4DHX5;G3V0F2;B4DQQ4	B7Z7G2;P22570;P22570-2;E7EQC1;B4DHX5;G3V0F2;B4DQQ4	5;5;5;5;5;4;3	5;5;5;5;5;4;3	5;5;5;5;5;4;3	NADPH:adrenodoxin oxidoreductase, mitochondrial	FDXR	>tr|B7Z7G2|B7Z7G2_HUMAN NADPH:adrenodoxin oxidoreductase, mitochondrial OS=Homo sapiens GN=FDXR PE=2 SV=1;>sp|P22570|ADRO_HUMAN NADPH:adrenodoxin oxidoreductase, mitochondrial OS=Homo sapiens GN=FDXR PE=1 SV=3;>sp|P22570-2|ADRO_HUMAN Isoform Long of NADPH:	7	5	5	5	2	0	0	0	1	0	3	1	0	1	2	0	2	0	0	0	1	0	3	1	0	1	2	0	2	0	0	0	1	0	3	1	0	1	2	0	14.8	14.8
B4DI49;O15534	B4DI49;O15534	1;1	1;1	1;1	Period circadian protein homolog 1	PER1	>tr|B4DI49|B4DI49_HUMAN Period circadian protein homolog 1 OS=Homo sapiens GN=PER1 PE=2 SV=1;>sp|O15534|PER1_HUMAN Period circadian protein homolog 1 OS=Homo sapiens GN=PER1 PE=1 SV=2	2	1	1	1	1	1	1	0	0	0	0	0	1	1	1	1	1	1	1	0	0	0	0	0	1	1	1	1	1	1	1	0	0	0	0	0	1	1	1	1	1.2	1.2
B4DJ81;P28331-3;P28331-4;E7ENF3;P28331;P28331-2	B4DJ81;P28331-3;P28331-4;E7ENF3;P28331;P28331-2	5;5;5;5;5;5	5;5;5;5;5;5	5;5;5;5;5;5	NADH-ubiquinone oxidoreductase 75 kDa subunit, mitochondrial	NDUFS1	>tr|B4DJ81|B4DJ81_HUMAN NADH-ubiquinone oxidoreductase 75 kDa subunit, mitochondrial OS=Homo sapiens GN=NDUFS1 PE=2 SV=1;>sp|P28331-3|NDUS1_HUMAN Isoform 3 of NADH-ubiquinone oxidoreductase 75 kDa subunit, mitochondrial OS=Homo sapiens GN=NDUFS1;>sp|P28331	6	5	5	5	3	0	2	0	1	2	3	0	2	4	4	2	3	0	2	0	1	2	3	0	2	4	4	2	3	0	2	0	1	2	3	0	2	4	4	2	11.8	11.8
E9PNR9;E9PQ98;E9PIX6;H0YDE4;B4DJ87;E9PKG1;H7C2I1;Q99873-3;Q99873-2;G5E9B6;Q99873;Q9NR22-2;Q9NR22	E9PNR9;E9PQ98;E9PIX6;H0YDE4;B4DJ87;E9PKG1;H7C2I1;Q99873-3;Q99873-2;G5E9B6;Q99873	3;3;3;3;3;3;3;3;3;3;3;1;1	3;3;3;3;3;3;3;3;3;3;3;1;1	3;3;3;3;3;3;3;3;3;3;3;1;1	Protein arginine N-methyltransferase 1	PRMT1	>tr|E9PNR9|E9PNR9_HUMAN Protein arginine N-methyltransferase 1 (Fragment) OS=Homo sapiens GN=PRMT1 PE=4 SV=1;>tr|E9PQ98|E9PQ98_HUMAN Protein arginine N-methyltransferase 1 (Fragment) OS=Homo sapiens GN=PRMT1 PE=4 SV=1;>tr|E9PIX6|E9PIX6_HUMAN Protein argini	13	3	3	3	0	0	2	0	2	2	2	2	2	1	1	0	0	0	2	0	2	2	2	2	2	1	1	0	0	0	2	0	2	2	2	2	2	1	1	0	23.8	23.8
B4DJB1;F5H0H0;E9PFW3;Q96CW1-2;Q96CW1;C9JTK4;C9JGT8;C9JJ47;C9JJD3;H7C4C3;C9JPV8	B4DJB1;F5H0H0;E9PFW3;Q96CW1-2;Q96CW1;C9JTK4;C9JGT8;C9JJ47	4;4;4;4;4;2;2;2;1;1;1	4;4;4;4;4;2;2;2;1;1;1	4;4;4;4;4;2;2;2;1;1;1	AP-2 complex subunit mu	AP2M1	>tr|B4DJB1|B4DJB1_HUMAN AP-2 complex subunit mu OS=Homo sapiens GN=AP2M1 PE=2 SV=1;>tr|F5H0H0|F5H0H0_HUMAN AP-2 complex subunit mu OS=Homo sapiens GN=AP2M1 PE=4 SV=1;>tr|E9PFW3|E9PFW3_HUMAN AP-2 complex subunit mu OS=Homo sapiens GN=AP2M1 PE=4 SV=1;>sp|Q96	11	4	4	4	4	3	3	4	1	1	3	2	1	0	2	3	4	3	3	4	1	1	3	2	1	0	2	3	4	3	3	4	1	1	3	2	1	0	2	3	10.4	10.4
B4DVT3;B4DJL6;B4DVD5;Q96SY0-3;Q96SY0;H3BRY6	B4DVT3;B4DJL6;B4DVD5;Q96SY0-3;Q96SY0;H3BRY6	19;19;19;19;19;18	19;19;19;19;19;18	19;19;19;19;19;18	von Willebrand factor A domain-containing protein 9	VWA9	>tr|B4DVT3|B4DVT3_HUMAN UPF0464 protein C15orf44 OS=Homo sapiens GN=C15orf44 PE=2 SV=1;>tr|B4DJL6|B4DJL6_HUMAN UPF0464 protein C15orf44 OS=Homo sapiens GN=C15orf44 PE=2 SV=1;>tr|B4DVD5|B4DVD5_HUMAN UPF0464 protein C15orf44 OS=Homo sapiens GN=C15orf44 PE=2	6	19	19	19	11	13	10	11	14	14	13	15	11	13	15	15	11	13	10	11	14	14	13	15	11	13	15	15	11	13	10	11	14	14	13	15	11	13	15	15	52.1	52.1
B4DJP7;P62318	B4DJP7;P62318	5;5	5;5	5;5	Small nuclear ribonucleoprotein Sm D3	SNRPD3	>tr|B4DJP7|B4DJP7_HUMAN Small nuclear ribonucleoprotein Sm D3 OS=Homo sapiens GN=SNRPD3 PE=2 SV=1;>sp|P62318|SMD3_HUMAN Small nuclear ribonucleoprotein Sm D3 OS=Homo sapiens GN=SNRPD3 PE=1 SV=1	2	5	5	5	4	5	4	4	4	4	3	4	3	4	5	5	4	5	4	4	4	4	3	4	3	4	5	5	4	5	4	4	4	4	3	4	3	4	5	5	55.8	55.8
B4DJV2;O75390;H0YIC4;F8W642;F8VZK9;F8VX07;F8VRP1;F8VX68;F8VPF9;F8VPA1;F8VTT8;F8W1S4;F8W4S1;H0YH82	B4DJV2;O75390;H0YIC4	3;3;2;1;1;1;1;1;1;1;1;1;1;1	3;3;2;1;1;1;1;1;1;1;1;1;1;1	3;3;2;1;1;1;1;1;1;1;1;1;1;1	Citrate synthase;Citrate synthase, mitochondrial	CS	>tr|B4DJV2|B4DJV2_HUMAN Citrate synthase OS=Homo sapiens GN=CS PE=2 SV=1;>sp|O75390|CISY_HUMAN Citrate synthase, mitochondrial OS=Homo sapiens GN=CS PE=1 SV=2;>tr|H0YIC4|H0YIC4_HUMAN Citrate synthase (Fragment) OS=Homo sapiens GN=CS PE=3 SV=1	14	3	3	3	1	2	0	1	1	1	2	2	0	1	2	0	1	2	0	1	1	1	2	2	0	1	2	0	1	2	0	1	1	1	2	2	0	1	2	0	13.7	13.7
B4DK30;Q15029	B4DK30;Q15029	21;21	21;21	21;21	116 kDa U5 small nuclear ribonucleoprotein component	EFTUD2	>tr|B4DK30|B4DK30_HUMAN 116 kDa U5 small nuclear ribonucleoprotein component OS=Homo sapiens GN=EFTUD2 PE=2 SV=1;>sp|Q15029|U5S1_HUMAN 116 kDa U5 small nuclear ribonucleoprotein component OS=Homo sapiens GN=EFTUD2 PE=1 SV=1	2	21	21	21	14	11	14	9	13	15	14	15	12	16	15	11	14	11	14	9	13	15	14	15	12	16	15	11	14	11	14	9	13	15	14	15	12	16	15	11	28.4	28.4
B4DKR0;Q13190-2;Q13190;Q13190-3;F8W8Q9;H7C3X5;E9PNU4	B4DKR0;Q13190-2;Q13190;Q13190-3;F8W8Q9;H7C3X5;E9PNU4	8;8;8;7;7;5;4	8;8;8;7;7;5;4	8;8;8;7;7;5;4	Syntaxin-5	STX5A;STX5	>tr|B4DKR0|B4DKR0_HUMAN Syntaxin 5A, isoform CRA_c OS=Homo sapiens GN=STX5A PE=2 SV=1;>sp|Q13190-2|STX5_HUMAN Isoform 2 of Syntaxin-5 OS=Homo sapiens GN=STX5;>sp|Q13190|STX5_HUMAN Syntaxin-5 OS=Homo sapiens GN=STX5 PE=1 SV=2;>sp|Q13190-3|STX5_HUMAN Isoform	7	8	8	8	6	4	4	4	3	5	4	4	4	5	5	6	6	4	4	4	3	5	4	4	4	5	5	6	6	4	4	4	3	5	4	4	4	5	5	6	42.9	42.9
B4DL14;P36542-2;P36542	B4DL14;P36542-2;P36542	4;4;4	4;4;4	4;4;4	ATP synthase subunit gamma;ATP synthase subunit gamma, mitochondrial	ATP5C1	>tr|B4DL14|B4DL14_HUMAN ATP synthase gamma chain OS=Homo sapiens GN=ATP5C1 PE=2 SV=1;>sp|P36542-2|ATPG_HUMAN Isoform Heart of ATP synthase subunit gamma, mitochondrial OS=Homo sapiens GN=ATP5C1;>sp|P36542|ATPG_HUMAN ATP synthase subunit gamma, mitochondria	3	4	4	4	2	2	1	1	2	2	2	2	1	4	3	3	2	2	1	1	2	2	2	2	1	4	3	3	2	2	1	1	2	2	2	2	1	4	3	3	25.2	25.2
B4DLL8;F6SKP1;F5GY20;Q14956-2;Q14956	B4DLL8;F6SKP1;F5GY20;Q14956-2;Q14956	2;2;2;2;2	2;2;2;2;2	2;2;2;2;2	Transmembrane glycoprotein NMB	GPNMB	>tr|B4DLL8|B4DLL8_HUMAN Transmembrane glycoprotein NMB OS=Homo sapiens GN=GPNMB PE=2 SV=1;>tr|F6SKP1|F6SKP1_HUMAN Transmembrane glycoprotein NMB OS=Homo sapiens GN=GPNMB PE=4 SV=1;>tr|F5GY20|F5GY20_HUMAN Transmembrane glycoprotein NMB OS=Homo sapiens GN=GP	5	2	2	2	1	0	0	1	2	2	2	2	0	2	2	1	1	0	0	1	2	2	2	2	0	2	2	1	1	0	0	1	2	2	2	2	0	2	2	1	5.9	5.9
B4DLN1;P52815	B4DLN1	13;3	13;3	3;3		MRPL12	>tr|B4DLN1|B4DLN1_HUMAN Mitochondrial dicarboxylate carrier OS=Homo sapiens GN=SLC25A10 PE=2 SV=1	2	13	13	3	12	11	11	10	9	11	12	10	11	12	12	12	12	11	11	10	9	11	12	10	11	12	12	12	3	3	3	3	3	3	3	3	3	3	3	3	34.4	34.4
B4DM82;P62937;F8WE65;C9J5S7;E5RIZ5;Q567Q0;Q9Y536;F5H284	B4DM82;P62937;F8WE65;C9J5S7	6;6;5;5;2;1;1;1	6;6;5;5;2;1;1;1	6;6;5;5;2;1;1;1	Peptidyl-prolyl cis-trans isomerase;Peptidyl-prolyl cis-trans isomerase A;Peptidyl-prolyl cis-trans isomerase A, N-terminally processed	PPIA	>tr|B4DM82|B4DM82_HUMAN Peptidyl-prolyl cis-trans isomerase OS=Homo sapiens GN=PPIA PE=2 SV=1;>sp|P62937|PPIA_HUMAN Peptidyl-prolyl cis-trans isomerase A OS=Homo sapiens GN=PPIA PE=1 SV=2;>tr|F8WE65|F8WE65_HUMAN Peptidyl-prolyl cis-trans isomerase OS=Homo	8	6	6	6	5	2	3	3	2	4	5	4	4	3	3	2	5	2	3	3	2	4	5	4	4	3	3	2	5	2	3	3	2	4	5	4	4	3	3	2	45	45
B4DMI6;Q5MNZ6;I3L4S6;I3L4L8;I3L1D0;I3L3A5	B4DMI6;Q5MNZ6;I3L4S6	17;17;12;6;6;3	17;17;12;6;6;3	17;17;12;6;6;3	WD repeat domain phosphoinositide-interacting protein 3	WDR45L;WDR45B	>tr|B4DMI6|B4DMI6_HUMAN WD repeat domain phosphoinositide-interacting protein 3 OS=Homo sapiens GN=WDR45L PE=2 SV=1;>sp|Q5MNZ6|WIPI3_HUMAN WD repeat domain phosphoinositide-interacting protein 3 OS=Homo sapiens GN=WDR45L PE=2 SV=2;>tr|I3L4S6|I3L4S6_HUMAN W	6	17	17	17	13	12	14	12	14	9	13	15	13	13	13	12	13	12	14	12	14	9	13	15	13	13	13	12	13	12	14	12	14	9	13	15	13	13	13	12	40.5	40.5
B4DMY4;F5H2P9;P07858	B4DMY4;F5H2P9;P07858	3;3;3	3;3;3	3;3;3	Cathepsin B;Cathepsin B light chain;Cathepsin B heavy chain	CTSB	>tr|B4DMY4|B4DMY4_HUMAN Cathepsin B OS=Homo sapiens GN=CTSB PE=2 SV=1;>tr|F5H2P9|F5H2P9_HUMAN Cathepsin B OS=Homo sapiens GN=CTSB PE=3 SV=1;>sp|P07858|CATB_HUMAN Cathepsin B OS=Homo sapiens GN=CTSB PE=1 SV=3	3	3	3	3	1	2	1	0	1	2	2	3	0	1	2	1	1	2	1	0	1	2	2	3	0	1	2	1	1	2	1	0	1	2	2	3	0	1	2	1	18.8	18.8
B4DN60;O43776	B4DN60;O43776	4;4	4;4	4;4	Asparagine--tRNA ligase, cytoplasmic	NARS	>tr|B4DN60|B4DN60_HUMAN Asparagine--tRNA ligase, cytoplasmic OS=Homo sapiens GN=NARS PE=2 SV=1;>sp|O43776|SYNC_HUMAN Asparagine--tRNA ligase, cytoplasmic OS=Homo sapiens GN=NARS PE=1 SV=1	2	4	4	4	2	2	3	1	3	1	2	3	1	1	1	1	2	2	3	1	3	1	2	3	1	1	1	1	2	2	3	1	3	1	2	3	1	1	1	1	18.1	18.1
F5GYR4;Q96I63;B4DNM1;Q96TA2-2;Q96TA2;Q5T8D1;Q5T8D2	F5GYR4;Q96I63;B4DNM1;Q96TA2-2;Q96TA2	6;6;6;6;6;2;1	6;6;6;6;6;2;1	6;6;6;6;6;2;1	ATP-dependent zinc metalloprotease YME1L1	YME1L1	>tr|F5GYR4|F5GYR4_HUMAN ATP-dependent zinc metalloprotease YME1L1 OS=Homo sapiens GN=YME1L1 PE=3 SV=1;>tr|Q96I63|Q96I63_HUMAN ATP-dependent zinc metalloprotease YME1L1 OS=Homo sapiens GN=YME1L1 PE=2 SV=1;>tr|B4DNM1|B4DNM1_HUMAN ATP-dependent zinc metallopr	7	6	6	6	4	6	3	1	1	2	3	5	4	6	6	5	4	6	3	1	1	2	3	5	4	6	6	5	4	6	3	1	1	2	3	5	4	6	6	5	16.1	16.1
B4DP08;Q9BT22	B4DP08;Q9BT22	1;1	1;1	1;1	Chitobiosyldiphosphodolichol beta-mannosyltransferase	ALG1	>tr|B4DP08|B4DP08_HUMAN Chitobiosyldiphosphodolichol beta-mannosyltransferase OS=Homo sapiens GN=ALG1 PE=2 SV=1;>sp|Q9BT22|ALG1_HUMAN Chitobiosyldiphosphodolichol beta-mannosyltransferase OS=Homo sapiens GN=ALG1 PE=1 SV=2	2	1	1	1	1	1	1	0	1	1	0	1	0	1	0	1	1	1	1	0	1	1	0	1	0	1	0	1	1	1	1	0	1	1	0	1	0	1	0	1	3.7	3.7
B4DP24;Q9BW60	B4DP24;Q9BW60	2;2	2;2	2;2	Elongation of very long chain fatty acids protein 1	ELOVL1	>tr|B4DP24|B4DP24_HUMAN Elongation of very long chain fatty acids protein 1 OS=Homo sapiens GN=ELOVL1 PE=2 SV=1;>sp|Q9BW60|ELOV1_HUMAN Elongation of very long chain fatty acids protein 1 OS=Homo sapiens GN=ELOVL1 PE=1 SV=1	2	2	2	2	2	1	1	1	1	1	1	2	1	2	2	1	2	1	1	1	1	1	1	2	1	2	2	1	2	1	1	1	1	1	1	2	1	2	2	1	9.9	9.9
F5GX39;F6QWA0;E7EQ72;B4DP27;Q15363	F5GX39;F6QWA0;E7EQ72;B4DP27;Q15363	1;1;1;1;1	1;1;1;1;1	1;1;1;1;1	Transmembrane emp24 domain-containing protein 2	TMED2	>tr|F5GX39|F5GX39_HUMAN Transmembrane emp24 domain-containing protein 2 OS=Homo sapiens GN=TMED2 PE=3 SV=1;>tr|F6QWA0|F6QWA0_HUMAN Transmembrane emp24 domain-containing protein 2 OS=Homo sapiens GN=TMED2 PE=4 SV=1;>tr|E7EQ72|E7EQ72_HUMAN Transmembrane emp2	5	1	1	1	1	1	1	1	1	1	1	1	0	1	1	1	1	1	1	1	1	1	1	1	0	1	1	1	1	1	1	1	1	1	1	1	0	1	1	1	7.8	7.8
B4DP54;Q9BUF5;B3KS31;A6NKZ8;CON__ENSEMBL:ENSBTAP00000025008;Q9H4B7	B4DP54;Q9BUF5;B3KS31	15;15;12;5;4;4	5;5;2;0;0;0	5;5;2;0;0;0	Tubulin beta-6 chain	TUBB6	>tr|B4DP54|B4DP54_HUMAN Tubulin beta-6 chain OS=Homo sapiens GN=TUBB6 PE=2 SV=1;>sp|Q9BUF5|TBB6_HUMAN Tubulin beta-6 chain OS=Homo sapiens GN=TUBB6 PE=1 SV=1;>tr|B3KS31|B3KS31_HUMAN Tubulin beta-6 chain OS=Homo sapiens GN=TUBB6 PE=2 SV=1	6	15	5	5	9	13	14	13	13	10	11	13	10	11	11	12	2	3	4	3	3	2	2	3	2	3	1	2	2	3	4	3	3	2	2	3	2	3	1	2	40.9	20.1
B4DPC1;F5H869;P20226;Q6SJ96;H0Y6D8	B4DPC1;F5H869;P20226;Q6SJ96	3;3;3;2;1	3;3;3;2;1	3;3;3;2;1	TATA-box-binding protein;TATA box-binding protein-like protein 2	TBP;TBPL2	>tr|B4DPC1|B4DPC1_HUMAN TATA-box-binding protein OS=Homo sapiens GN=TBP PE=2 SV=1;>tr|F5H869|F5H869_HUMAN TATA-box-binding protein OS=Homo sapiens GN=TBP PE=3 SV=1;>sp|P20226|TBP_HUMAN TATA-box-binding protein OS=Homo sapiens GN=TBP PE=1 SV=2;>sp|Q6SJ96|TB	5	3	3	3	1	1	1	1	2	1	1	2	1	1	1	1	1	1	1	1	2	1	1	2	1	1	1	1	1	1	1	1	2	1	1	2	1	1	1	1	14.6	14.6
F6TTN0;B4DPY8;O94842;O15405-2;O15405;B4DYA1;O94900;B4DQV8;E1P5X0;Q96NM4;G3XAC7;Q96NM4-2;C9J919;C9JNL1	F6TTN0;B4DPY8;O94842	18;18;18;7;7;4;4;3;3;3;3;3;1;1	18;18;18;7;7;4;4;3;3;3;3;3;1;1	18;18;18;7;7;4;4;3;3;3;3;3;1;1	TOX high mobility group box family member 4	TOX4	>tr|F6TTN0|F6TTN0_HUMAN TOX high mobility group box family member 4 OS=Homo sapiens GN=TOX4 PE=4 SV=1;>tr|B4DPY8|B4DPY8_HUMAN TOX high mobility group box family member 4 OS=Homo sapiens GN=TOX4 PE=2 SV=1;>sp|O94842|TOX4_HUMAN TOX high mobility group box fa	14	18	18	18	13	12	12	10	14	14	16	12	16	12	11	13	13	12	12	10	14	14	16	12	16	12	11	13	13	12	12	10	14	14	16	12	16	12	11	13	40.8	40.8
B4DQ42;Q9HC62;E7ENF4;H7C1A0;C9IYB7	B4DQ42;Q9HC62;E7ENF4	15;15;11;6;2	15;15;11;6;2	15;15;11;6;2	Sentrin-specific protease 2	SENP2	>tr|B4DQ42|B4DQ42_HUMAN Sentrin-specific protease 2 OS=Homo sapiens GN=SENP2 PE=2 SV=1;>sp|Q9HC62|SENP2_HUMAN Sentrin-specific protease 2 OS=Homo sapiens GN=SENP2 PE=1 SV=3;>tr|E7ENF4|E7ENF4_HUMAN Sentrin-specific protease 2 OS=Homo sapiens GN=SENP2 PE=4 S	5	15	15	15	10	9	9	8	14	10	11	11	10	9	9	10	10	9	9	8	14	10	11	11	10	9	9	10	10	9	9	8	14	10	11	11	10	9	9	10	29.5	29.5
B4DQA8;E9PCW1;O95249;Q96QI9;G5E9T8	B4DQA8;E9PCW1;O95249;Q96QI9;G5E9T8	2;2;2;1;1	2;2;2;1;1	2;2;2;1;1	Golgi SNAP receptor complex member 1	GOSR1	>tr|B4DQA8|B4DQA8_HUMAN Golgi SNAP receptor complex member 1 OS=Homo sapiens GN=GOSR1 PE=2 SV=1;>tr|E9PCW1|E9PCW1_HUMAN Golgi SNAP receptor complex member 1 OS=Homo sapiens GN=GOSR1 PE=3 SV=1;>sp|O95249|GOSR1_HUMAN Golgi SNAP receptor complex member 1 OS=H	5	2	2	2	1	1	1	1	0	0	0	2	1	1	1	1	1	1	1	1	0	0	0	2	1	1	1	1	1	1	1	1	0	0	0	2	1	1	1	1	13.2	13.2
B4DQI6;Q13595-2;B4DUA9;Q13595	B4DQI6;Q13595-2;B4DUA9;Q13595	2;2;2;2	2;2;2;2	2;2;2;2	Transformer-2 protein homolog alpha	TRA2A	>tr|B4DQI6|B4DQI6_HUMAN Transformer-2 protein homolog alpha OS=Homo sapiens GN=TRA2A PE=2 SV=1;>sp|Q13595-2|TRA2A_HUMAN Isoform Short of Transformer-2 protein homolog alpha OS=Homo sapiens GN=TRA2A;>tr|B4DUA9|B4DUA9_HUMAN Transformer-2 protein homolog alph	4	2	2	2	1	2	2	1	0	1	1	1	1	0	0	0	1	2	2	1	0	1	1	1	1	0	0	0	1	2	2	1	0	1	1	1	1	0	0	0	12.8	12.8
Q96DI7;B4DQJ1;Q9NSS8	Q96DI7;B4DQJ1	5;5;2	5;5;2	5;5;2	U5 small nuclear ribonucleoprotein 40 kDa protein	SNRNP40	>sp|Q96DI7|SNR40_HUMAN U5 small nuclear ribonucleoprotein 40 kDa protein OS=Homo sapiens GN=SNRNP40 PE=1 SV=1;>tr|B4DQJ1|B4DQJ1_HUMAN U5 small nuclear ribonucleoprotein 40 kDa protein OS=Homo sapiens GN=SNRNP40 PE=2 SV=1	3	5	5	5	1	2	1	0	3	3	3	4	2	2	2	1	1	2	1	0	3	3	3	4	2	2	2	1	1	2	1	0	3	3	3	4	2	2	2	1	17.1	17.1
B4DR52;Q99880;Q99879;Q99877;Q93079;Q5QNW6;P62807;P58876;P57053;O60814;Q5QNW6-2;Q96A08	B4DR52;Q99880;Q99879;Q99877;Q93079;Q5QNW6;P62807;P58876;P57053;O60814;Q5QNW6-2	4;4;4;4;4;4;4;4;4;4;4;1	4;4;4;4;4;4;4;4;4;4;4;1	2;2;2;2;2;2;2;2;2;2;2;0	Histone H2B;Histone H2B type 1-L;Histone H2B type 1-M;Histone H2B type 1-N;Histone H2B type 1-H;Histone H2B type 2-F;Histone H2B type 1-C/E/F/G/I;Histone H2B type 1-D;Histone H2B type F-S;Histone H2B type 1-K	HIST1H2BL;HIST1H2BM;HIST1H2BN;HIST1H2BH;HIST2H2BF;HIST1H2BC;HIST1H2BD;H2BFS;HIST1H2BK	>tr|B4DR52|B4DR52_HUMAN Histone H2B OS=Homo sapiens GN=HIST2H2BF PE=2 SV=1;>sp|Q99880|H2B1L_HUMAN Histone H2B type 1-L OS=Homo sapiens GN=HIST1H2BL PE=1 SV=3;>sp|Q99879|H2B1M_HUMAN Histone H2B type 1-M OS=Homo sapiens GN=HIST1H2BM PE=1 SV=3;>sp|Q99877|H2B1	12	4	4	2	4	4	4	3	4	4	4	4	2	4	3	4	4	4	4	3	4	4	4	4	2	4	3	4	2	2	2	1	2	2	2	2	0	2	1	2	20.5	20.5
B4DR61;P61619;P61619-3;H7C1Q9;C9JXC6;H7C069;A6NK38;F2Z2C7;A6NIF9;C9JJV4;F8W776;Q8TC24;Q9H9S3-2;F8W773;Q9H9S3	B4DR61;P61619;P61619-3	7;7;5;1;1;1;1;1;1;1;1;1;1;1;1	7;7;5;1;1;1;1;1;1;1;1;1;1;1;1	7;7;5;1;1;1;1;1;1;1;1;1;1;1;1	Protein transport protein Sec61 subunit alpha isoform 1	SEC61A1	>tr|B4DR61|B4DR61_HUMAN Protein transport protein Sec61 subunit alpha isoform 1 OS=Homo sapiens GN=SEC61A1 PE=2 SV=1;>sp|P61619|S61A1_HUMAN Protein transport protein Sec61 subunit alpha isoform 1 OS=Homo sapiens GN=SEC61A1 PE=1 SV=2;>sp|P61619-3|S61A1_HUMA	15	7	7	7	6	5	4	5	7	5	6	4	5	4	6	4	6	5	4	5	7	5	6	4	5	4	6	4	6	5	4	5	7	5	6	4	5	4	6	4	20.7	20.7
B4DR63;P62191	B4DR63;P62191	2;2	2;2	2;2	26S protease regulatory subunit 4	PSMC1	>tr|B4DR63|B4DR63_HUMAN 26S protease regulatory subunit 4 OS=Homo sapiens GN=PSMC1 PE=2 SV=1;>sp|P62191|PRS4_HUMAN 26S protease regulatory subunit 4 OS=Homo sapiens GN=PSMC1 PE=1 SV=1	2	2	2	2	2	2	2	2	2	2	2	2	1	2	2	1	2	2	2	2	2	2	2	2	1	2	2	1	2	2	2	2	2	2	2	2	1	2	2	1	6	6
B4DR70;H3BPE7;P35637-2;P35637;F5GWQ7;Q92804-2;Q92804	B4DR70;H3BPE7;P35637-2;P35637	7;7;7;7;2;2;2	7;7;7;7;2;2;2	7;7;7;7;2;2;2	RNA-binding protein FUS	FUS	>tr|B4DR70|B4DR70_HUMAN RNA-binding protein FUS OS=Homo sapiens GN=FUS PE=2 SV=1;>tr|H3BPE7|H3BPE7_HUMAN RNA-binding protein FUS OS=Homo sapiens GN=FUS PE=4 SV=1;>sp|P35637-2|FUS_HUMAN Isoform Short of RNA-binding protein FUS OS=Homo sapiens GN=FUS;>sp|P35	7	7	7	7	5	4	7	5	6	7	7	7	5	4	4	5	5	4	7	5	6	7	7	7	5	4	4	5	5	4	7	5	6	7	7	7	5	4	4	5	17	17
Q02809;B4DR87;E7EWK8;Q5JXB9;Q5JXB7;Q5JXB8	Q02809;B4DR87	27;27;13;9;9;7	27;27;13;9;9;7	27;27;13;9;9;7	Procollagen-lysine,2-oxoglutarate 5-dioxygenase 1	PLOD1	>sp|Q02809|PLOD1_HUMAN Procollagen-lysine,2-oxoglutarate 5-dioxygenase 1 OS=Homo sapiens GN=PLOD1 PE=1 SV=2;>tr|B4DR87|B4DR87_HUMAN Procollagen-lysine,2-oxoglutarate 5-dioxygenase 1 OS=Homo sapiens GN=PLOD1 PE=2 SV=1	6	27	27	27	18	18	16	15	21	19	22	20	15	15	17	14	18	18	16	15	21	19	22	20	15	15	17	14	18	18	16	15	21	19	22	20	15	15	17	14	44	44
Q5JW01;H0YCM7;H0YEH5;B4DZ20;F5GZP8;Q5JVZ5;B4DRL5;Q7Z5G9;Q96JJ3	Q5JW01;H0YCM7;H0YEH5;B4DZ20;F5GZP8;Q5JVZ5;B4DRL5;Q7Z5G9;Q96JJ3	2;2;2;2;2;2;2;2;2	2;2;2;2;2;2;2;2;2	2;2;2;2;2;2;2;2;2	Engulfment and cell motility protein 2	ELMO2	>tr|Q5JW01|Q5JW01_HUMAN Engulfment and cell motility 2 (Fragment) OS=Homo sapiens GN=ELMO2 PE=2 SV=1;>tr|H0YCM7|H0YCM7_HUMAN Engulfment and cell motility protein 2 (Fragment) OS=Homo sapiens GN=ELMO2 PE=4 SV=1;>tr|H0YEH5|H0YEH5_HUMAN Engulfment and cell mo	9	2	2	2	1	1	2	1	1	1	1	0	0	1	1	1	1	1	2	1	1	1	1	0	0	1	1	1	1	1	2	1	1	1	1	0	0	1	1	1	7.8	7.8
F5H831;B4E236;B4DRN0;O60353	F5H831;B4E236;B4DRN0;O60353	2;2;2;2	2;2;2;2	2;2;2;2	Frizzled-6	FZD6	>tr|F5H831|F5H831_HUMAN Frizzled-6 OS=Homo sapiens GN=FZD6 PE=4 SV=1;>tr|B4E236|B4E236_HUMAN Frizzled-6 OS=Homo sapiens GN=FZD6 PE=2 SV=1;>tr|B4DRN0|B4DRN0_HUMAN Frizzled-6 OS=Homo sapiens GN=FZD6 PE=2 SV=1;>sp|O60353|FZD6_HUMAN Frizzled-6 OS=Homo sapiens	4	2	2	2	1	2	1	2	1	0	0	1	0	1	1	1	1	2	1	2	1	0	0	1	0	1	1	1	1	2	1	2	1	0	0	1	0	1	1	1	8	8
D6RH20;G5EA06;Q92552;B4DRT2	D6RH20;G5EA06;Q92552;B4DRT2	2;2;2;2	2;2;2;2	2;2;2;2	28S ribosomal protein S27, mitochondrial	MRPS27	>tr|D6RH20|D6RH20_HUMAN 28S ribosomal protein S27, mitochondrial (Fragment) OS=Homo sapiens GN=MRPS27 PE=4 SV=1;>tr|G5EA06|G5EA06_HUMAN 28S ribosomal protein S27, mitochondrial OS=Homo sapiens GN=MRPS27 PE=4 SV=1;>sp|Q92552|RT27_HUMAN 28S ribosomal protein	4	2	2	2	1	1	1	1	1	1	1	1	1	2	1	1	1	1	1	1	1	1	1	1	1	2	1	1	1	1	1	1	1	1	1	1	1	2	1	1	6.4	6.4
H0YB02;G3V111;P48454-2;P48454;B4DRT5;E9PPC8;E9PK68;F5H0F8;E7ETC2;Q5F2F8;A1A441;Q08209-3;Q08209-2;P16298-2;P16298-3;Q08209;P16298;P16298-4	H0YB02;G3V111;P48454-2;P48454;B4DRT5;E9PPC8;E9PK68;F5H0F8;E7ETC2;Q5F2F8;A1A441;Q08209-3;Q08209-2;P16298-2;P16298-3;Q08209;P16298;P16298-4	2;2;2;2;2;1;1;1;1;1;1;1;1;1;1;1;1;1	2;2;2;2;2;1;1;1;1;1;1;1;1;1;1;1;1;1	2;2;2;2;2;1;1;1;1;1;1;1;1;1;1;1;1;1	Serine/threonine-protein phosphatase;Serine/threonine-protein phosphatase 2B catalytic subunit gamma isoform;Serine/threonine-protein phosphatase 2B catalytic subunit alpha isoform;Serine/threonine-protein phosphatase 2B catalytic subunit beta isoform	PPP3CC;PPP3CA;PPP3CB	>tr|H0YB02|H0YB02_HUMAN Serine/threonine-protein phosphatase 2B catalytic subunit gamma isoform (Fragment) OS=Homo sapiens GN=PPP3CC PE=4 SV=1;>tr|G3V111|G3V111_HUMAN Serine/threonine-protein phosphatase OS=Homo sapiens GN=PPP3CC PE=3 SV=1;>sp|P48454-2|PP2	18	2	2	2	0	0	1	0	2	1	1	0	0	0	0	0	0	0	1	0	2	1	1	0	0	0	0	0	0	0	1	0	2	1	1	0	0	0	0	0	13.1	13.1
H7C0X4;B4DS50;C9J7S5;C9JQW2;Q92685-2;Q92685	H7C0X4;B4DS50;C9J7S5;C9JQW2;Q92685-2;Q92685	2;2;2;2;2;2	2;2;2;2;2;2	2;2;2;2;2;2	Dol-P-Man:Man(5)GlcNAc(2)-PP-Dol alpha-1,3-mannosyltransferase	ALG3	>tr|H7C0X4|H7C0X4_HUMAN Dol-P-Man:Man(5)GlcNAc(2)-PP-Dol alpha-1,3-mannosyltransferase (Fragment) OS=Homo sapiens GN=ALG3 PE=4 SV=1;>tr|B4DS50|B4DS50_HUMAN Dol-P-Man:Man(5)GlcNAc(2)-PP-Dol alpha-1,3-mannosyltransferase OS=Homo sapiens GN=ALG3 PE=2 SV=1;>tr	6	2	2	2	2	2	1	1	1	0	0	2	1	2	1	1	2	2	1	1	1	0	0	2	1	2	1	1	2	2	1	1	1	0	0	2	1	2	1	1	6.2	6.2
B4DSE2;O14773-2;O14773	B4DSE2;O14773-2;O14773	6;6;6	6;6;6	6;6;6	Tripeptidyl-peptidase 1	TPP1	>tr|B4DSE2|B4DSE2_HUMAN Uncharacterized protein OS=Homo sapiens GN=TPP1 PE=2 SV=1;>sp|O14773-2|TPP1_HUMAN Isoform 2 of Tripeptidyl-peptidase 1 OS=Homo sapiens GN=TPP1;>sp|O14773|TPP1_HUMAN Tripeptidyl-peptidase 1 OS=Homo sapiens GN=TPP1 PE=1 SV=2	3	6	6	6	3	3	1	3	4	6	5	5	3	4	6	5	3	3	1	3	4	6	5	5	3	4	6	5	3	3	1	3	4	6	5	5	3	4	6	5	25.2	25.2
B4DVH1;F5GWW9;B4DSH3;Q9H0V9;Q9H0V9-2	B4DVH1;F5GWW9;B4DSH3;Q9H0V9;Q9H0V9-2	2;2;2;2;2	2;2;2;2;2	2;2;2;2;2	VIP36-like protein	LMAN2L	>tr|B4DVH1|B4DVH1_HUMAN VIP36-like protein OS=Homo sapiens GN=LMAN2L PE=2 SV=1;>tr|F5GWW9|F5GWW9_HUMAN VIP36-like protein OS=Homo sapiens GN=LMAN2L PE=4 SV=1;>tr|B4DSH3|B4DSH3_HUMAN VIP36-like protein OS=Homo sapiens GN=LMAN2L PE=2 SV=1;>sp|Q9H0V9|LMA2L_HU	5	2	2	2	1	1	2	1	2	2	2	1	1	1	1	1	1	1	2	1	2	2	2	1	1	1	1	1	1	1	2	1	2	2	2	1	1	1	1	1	6.9	6.9
H3BMH2;H3BSC1;B4DT13;P62491;Q15907;B4DQU5	H3BMH2;H3BSC1;B4DT13;P62491;Q15907	3;3;3;3;3;1	3;3;3;3;3;1	3;3;3;3;3;1	Ras-related protein Rab-11A;Ras-related protein Rab-11B	RAB11A;RAB11B	>tr|H3BMH2|H3BMH2_HUMAN Ras-related protein Rab-11A (Fragment) OS=Homo sapiens GN=RAB11A PE=3 SV=1;>tr|H3BSC1|H3BSC1_HUMAN Ras-related protein Rab-11A OS=Homo sapiens GN=RAB11A PE=3 SV=1;>tr|B4DT13|B4DT13_HUMAN Ras-related protein Rab-11A OS=Homo sapiens G	6	3	3	3	2	2	2	0	2	1	2	3	0	1	0	2	2	2	2	0	2	1	2	3	0	1	0	2	2	2	2	0	2	1	2	3	0	1	0	2	20.6	20.6
B4E0X8;F8W7W2;E9PEB5;B4DT31;Q96AE4;Q96AE4-2	B4E0X8;F8W7W2;E9PEB5;B4DT31;Q96AE4;Q96AE4-2	4;4;4;4;4;4	4;4;4;4;4;4	4;4;4;4;4;4	Far upstream element-binding protein 1	FUBP1	>tr|B4E0X8|B4E0X8_HUMAN Far upstream element-binding protein 1 OS=Homo sapiens GN=FUBP1 PE=2 SV=1;>tr|F8W7W2|F8W7W2_HUMAN Far upstream element-binding protein 1 OS=Homo sapiens GN=FUBP1 PE=4 SV=1;>tr|E9PEB5|E9PEB5_HUMAN Far upstream element-binding protein	6	4	4	4	1	0	3	0	1	0	0	1	1	0	0	0	1	0	3	0	1	0	0	1	1	0	0	0	1	0	3	0	1	0	0	1	1	0	0	0	6.5	6.5
B4DT58;Q92785;E9PN04	B4DT58;Q92785;E9PN04	2;2;1	2;2;1	2;2;1	Zinc finger protein ubi-d4	DPF2	>tr|B4DT58|B4DT58_HUMAN Zinc finger protein ubi-d4 OS=Homo sapiens GN=DPF2 PE=2 SV=1;>sp|Q92785|REQU_HUMAN Zinc finger protein ubi-d4 OS=Homo sapiens GN=DPF2 PE=1 SV=2;>tr|E9PN04|E9PN04_HUMAN Zinc finger protein ubi-d4 OS=Homo sapiens GN=DPF2 PE=4 SV=1	3	2	2	2	1	2	0	0	2	1	1	0	0	1	1	0	1	2	0	0	2	1	1	0	0	1	1	0	1	2	0	0	2	1	1	0	0	1	1	0	15	15
B8ZZZ7;Q9NUQ6-2;Q9NUQ6;B4DT67	B8ZZZ7;Q9NUQ6-2;Q9NUQ6;B4DT67	4;4;4;4	4;4;4;4	4;4;4;4	SPATS2-like protein	SPATS2L	>tr|B8ZZZ7|B8ZZZ7_HUMAN DNA polymerase-transactivated protein 6, isoform CRA_b OS=Homo sapiens GN=SPATS2L PE=4 SV=1;>sp|Q9NUQ6-2|SPS2L_HUMAN Isoform 2 of SPATS2-like protein OS=Homo sapiens GN=SPATS2L;>sp|Q9NUQ6|SPS2L_HUMAN SPATS2-like protein OS=Homo sapi	4	4	4	4	3	3	2	3	1	1	0	2	3	3	3	3	3	3	2	3	1	1	0	2	3	3	3	3	3	3	2	3	1	1	0	2	3	3	3	3	12.4	12.4
I3L1D2;I3L4E0;I3L295;Q96K24;Q9H3L2;Q1HDL3;B4DT74;O75352	I3L1D2;I3L4E0;I3L295;Q96K24;Q9H3L2;Q1HDL3;B4DT74;O75352	1;1;1;1;1;1;1;1	1;1;1;1;1;1;1;1	1;1;1;1;1;1;1;1	Mannose-P-dolichol utilization defect 1 protein	MPDU1;HBEBP2BPA	>tr|I3L1D2|I3L1D2_HUMAN Mannose-P-dolichol utilization defect 1 protein OS=Homo sapiens GN=MPDU1 PE=4 SV=1;>tr|I3L4E0|I3L4E0_HUMAN Mannose-P-dolichol utilization defect 1 protein OS=Homo sapiens GN=MPDU1 PE=4 SV=1;>tr|I3L295|I3L295_HUMAN Mannose-P-dolichol	8	1	1	1	1	0	1	1	0	0	1	1	1	0	1	1	1	0	1	1	0	0	1	1	1	0	1	1	1	0	1	1	0	0	1	1	1	0	1	1	16.4	16.4
D6RF44;H0YA96;D6RAF8;H0Y8G5;H7BXN2;B4DTC3;Q14103-4;Q14103-3;Q14103-2;Q14103;D6RBQ9;D6RD83;F5H6R6	D6RF44;H0YA96;D6RAF8;H0Y8G5;H7BXN2;B4DTC3;Q14103-4;Q14103-3;Q14103-2;Q14103;D6RBQ9;D6RD83	6;6;6;6;6;6;6;6;6;6;5;4;1	6;6;6;6;6;6;6;6;6;6;5;4;1	5;5;5;5;5;5;5;5;5;5;4;4;1	Heterogeneous nuclear ribonucleoprotein D0	HNRNPD	>tr|D6RF44|D6RF44_HUMAN Heterogeneous nuclear ribonucleoprotein D0 (Fragment) OS=Homo sapiens GN=HNRNPD PE=4 SV=1;>tr|H0YA96|H0YA96_HUMAN Heterogeneous nuclear ribonucleoprotein D0 (Fragment) OS=Homo sapiens GN=HNRNPD PE=4 SV=1;>tr|D6RAF8|D6RAF8_HUMAN Hete	13	6	6	5	4	6	6	6	4	4	4	4	5	5	5	5	4	6	6	6	4	4	4	4	5	5	5	5	3	5	5	5	3	3	3	3	4	4	4	4	53.6	53.6
G3V4A5;O75586;B4DU17	G3V4A5;O75586;B4DU17	3;3;3	3;3;3	3;3;3	Mediator of RNA polymerase II transcription subunit 6	MED6	>tr|G3V4A5|G3V4A5_HUMAN Mediator of RNA polymerase II transcription subunit 6 OS=Homo sapiens GN=MED6 PE=3 SV=1;>sp|O75586|MED6_HUMAN Mediator of RNA polymerase II transcription subunit 6 OS=Homo sapiens GN=MED6 PE=1 SV=2;>tr|B4DU17|B4DU17_HUMAN Mediator o	3	3	3	3	2	1	2	2	1	2	2	3	0	0	2	2	2	1	2	2	1	2	2	3	0	0	2	2	2	1	2	2	1	2	2	3	0	0	2	2	14.5	14.5
B4DU97;O43808;B0QYW5;F5GYD1;F8WE74;B1AHN4;F8WEC6	B4DU97;O43808;B0QYW5;F5GYD1;F8WE74	8;8;7;7;6;1;1	8;8;7;7;6;1;1	8;8;7;7;6;1;1	Peroxisomal membrane protein PMP34	SLC25A17	>tr|B4DU97|B4DU97_HUMAN Peroxisomal membrane protein PMP34 OS=Homo sapiens GN=SLC25A17 PE=2 SV=1;>sp|O43808|PM34_HUMAN Peroxisomal membrane protein PMP34 OS=Homo sapiens GN=SLC25A17 PE=1 SV=1;>tr|B0QYW5|B0QYW5_HUMAN Peroxisomal membrane protein PMP34 OS=Ho	7	8	8	8	5	3	6	4	5	4	6	7	5	5	2	4	5	3	6	4	5	4	6	7	5	5	2	4	5	3	6	4	5	4	6	7	5	5	2	4	35.6	35.6
E9PID8;B4DUD5;E7EWR4;P33240-2;P33240	E9PID8;B4DUD5;E7EWR4;P33240-2;P33240	8;8;8;8;8	8;8;8;8;8	6;6;6;6;6	Cleavage stimulation factor subunit 2	CSTF2	>tr|E9PID8|E9PID8_HUMAN Cleavage stimulation factor subunit 2 OS=Homo sapiens GN=CSTF2 PE=4 SV=1;>tr|B4DUD5|B4DUD5_HUMAN Cleavage stimulation factor subunit 2 OS=Homo sapiens GN=CSTF2 PE=2 SV=1;>tr|E7EWR4|E7EWR4_HUMAN Cleavage stimulation factor subunit 2	5	8	8	6	5	6	5	6	6	7	7	7	8	6	6	7	5	6	5	6	6	7	7	7	8	6	6	7	3	4	3	4	4	5	5	6	6	4	4	5	25.3	25.3
H3BQM0;E9PC61;Q8NDF8;B4DV38;Q8NDF8-3;Q8NDF8-2	H3BQM0;E9PC61;Q8NDF8;B4DV38;Q8NDF8-3	4;4;4;4;2;1	4;4;4;4;2;1	4;4;4;4;2;1	Non-canonical poly(A) RNA polymerase PAPD5	PAPD5	>tr|H3BQM0|H3BQM0_HUMAN PAP-associated domain-containing protein 5 OS=Homo sapiens GN=PAPD5 PE=4 SV=1;>tr|E9PC61|E9PC61_HUMAN PAP-associated domain-containing protein 5 OS=Homo sapiens GN=PAPD5 PE=4 SV=1;>sp|Q8NDF8|PAPD5_HUMAN PAP-associated domain-contain	6	4	4	4	3	2	2	2	2	3	2	2	2	2	2	2	3	2	2	2	2	3	2	2	2	2	2	2	3	2	2	2	2	3	2	2	2	2	2	2	8.7	8.7
B4DV79;F8W8C8;P55884;P55884-2;C9JQN7	B4DV79;F8W8C8;P55884;P55884-2	4;4;4;4;1	4;4;4;4;1	4;4;4;4;1	Eukaryotic translation initiation factor 3 subunit B	EIF3B	>tr|B4DV79|B4DV79_HUMAN Eukaryotic translation initiation factor 3 subunit B OS=Homo sapiens GN=EIF3B PE=2 SV=1;>tr|F8W8C8|F8W8C8_HUMAN Eukaryotic translation initiation factor 3 subunit B OS=Homo sapiens GN=EIF3B PE=3 SV=1;>sp|P55884|EIF3B_HUMAN Eukaryoti	5	4	4	4	3	3	3	2	3	2	4	2	2	2	1	2	3	3	3	2	3	2	4	2	2	2	1	2	3	3	3	2	3	2	4	2	2	2	1	2	5.7	5.7
B4DVM5;Q96S15-2;Q96S15	B4DVM5;Q96S15-2;Q96S15	6;6;5	6;6;5	6;6;5	WD repeat-containing protein 24	WDR24	>tr|B4DVM5|B4DVM5_HUMAN Uncharacterized protein OS=Homo sapiens GN=WDR24 PE=2 SV=1;>sp|Q96S15-2|WDR24_HUMAN Isoform 2 of WD repeat-containing protein 24 OS=Homo sapiens GN=WDR24;>sp|Q96S15|WDR24_HUMAN WD repeat-containing protein 24 OS=Homo sapiens GN=WDR2	3	6	6	6	1	1	1	0	3	4	4	4	2	2	1	1	1	1	1	0	3	4	4	4	2	2	1	1	1	1	1	0	3	4	4	4	2	2	1	1	14.1	14.1
F5H610;F5H2X8;B4DVP2;Q9Y478	F5H610;F5H2X8;B4DVP2;Q9Y478	1;1;1;1	1;1;1;1	1;1;1;1	5-AMP-activated protein kinase subunit beta-1	PRKAB1	>tr|F5H610|F5H610_HUMAN 5-AMP-activated protein kinase subunit beta-1 (Fragment) OS=Homo sapiens GN=PRKAB1 PE=4 SV=1;>tr|F5H2X8|F5H2X8_HUMAN 5-AMP-activated protein kinase subunit beta-1 OS=Homo sapiens GN=PRKAB1 PE=4 SV=1;>tr|B4DVP2|B4DVP2_HUMAN 5-AMP-	4	1	1	1	1	0	1	0	1	0	1	1	1	0	0	1	1	0	1	0	1	0	1	1	1	0	0	1	1	0	1	0	1	0	1	1	1	0	0	1	25.8	25.8
B4DWJ2;P47897;B4DNN3;C9J165;H7C0R3;C9JSG9;B7Z840;F2Z2V6	B4DWJ2;P47897;B4DNN3	17;17;15;8;7;6;6;4	17;17;15;8;7;6;6;4	17;17;15;8;7;6;6;4	Glutamine--tRNA ligase	QARS	>tr|B4DWJ2|B4DWJ2_HUMAN Glutamine--tRNA ligase OS=Homo sapiens GN=QARS PE=2 SV=1;>sp|P47897|SYQ_HUMAN Glutamine--tRNA ligase OS=Homo sapiens GN=QARS PE=1 SV=1;>tr|B4DNN3|B4DNN3_HUMAN Uncharacterized protein OS=Homo sapiens GN=QARS PE=2 SV=1	8	17	17	17	11	11	11	5	8	12	10	9	14	13	10	13	11	11	11	5	8	12	10	9	14	13	10	13	11	11	11	5	8	12	10	9	14	13	10	13	26.6	26.6
B4DWL3;P11279	B4DWL3;P11279	1;1	1;1	1;1	Lysosome-associated membrane glycoprotein 1	LAMP1	>tr|B4DWL3|B4DWL3_HUMAN Lysosome-associated membrane glycoprotein 1 OS=Homo sapiens GN=LAMP1 PE=2 SV=1;>sp|P11279|LAMP1_HUMAN Lysosome-associated membrane glycoprotein 1 OS=Homo sapiens GN=LAMP1 PE=1 SV=3	2	1	1	1	0	0	0	1	1	0	1	0	0	0	1	1	0	0	0	1	1	0	1	0	0	0	1	1	0	0	0	1	1	0	1	0	0	0	1	1	3	3
B4DWN1;Q12907;D6RBV2;D6RIU4;D6RBH1;D6RDX1	B4DWN1;Q12907;D6RBV2;D6RIU4;D6RBH1	6;6;5;4;3;2	6;6;5;4;3;2	6;6;5;4;3;2	Vesicular integral-membrane protein VIP36	LMAN2	>tr|B4DWN1|B4DWN1_HUMAN Vesicular integral-membrane protein VIP36 OS=Homo sapiens GN=LMAN2 PE=2 SV=1;>sp|Q12907|LMAN2_HUMAN Vesicular integral-membrane protein VIP36 OS=Homo sapiens GN=LMAN2 PE=1 SV=1;>tr|D6RBV2|D6RBV2_HUMAN Vesicular integral-membrane pro	6	6	6	6	3	1	1	1	0	1	0	6	1	1	1	2	3	1	1	1	0	1	0	6	1	1	1	2	3	1	1	1	0	1	0	6	1	1	1	2	19.6	19.6
Q5BJF6-9;Q5BJF6-8;Q5BJF6-5;Q5BJF6-6;B4DX73;Q5BJF6-7;Q5BJF6-2;Q5BJF6-3;Q5BJF6-4;Q5BJF6;Q5T4C7;Q5T4C3;Q5T4C6;Q5T4C2	Q5BJF6-9;Q5BJF6-8;Q5BJF6-5;Q5BJF6-6;B4DX73;Q5BJF6-7;Q5BJF6-2;Q5BJF6-3;Q5BJF6-4;Q5BJF6	4;4;4;4;4;4;4;4;4;4;1;1;1;1	4;4;4;4;4;4;4;4;4;4;1;1;1;1	4;4;4;4;4;4;4;4;4;4;1;1;1;1	Outer dense fiber protein 2	ODF2	>sp|Q5BJF6-9|ODFP2_HUMAN Isoform 9 of Outer dense fiber protein 2 OS=Homo sapiens GN=ODF2;>sp|Q5BJF6-8|ODFP2_HUMAN Isoform 8 of Outer dense fiber protein 2 OS=Homo sapiens GN=ODF2;>sp|Q5BJF6-5|ODFP2_HUMAN Isoform 5 of Outer dense fiber protein 2 OS=Homo sa	14	4	4	4	0	1	3	0	0	0	1	1	0	0	0	0	0	1	3	0	0	0	1	1	0	0	0	0	0	1	3	0	0	0	1	1	0	0	0	0	10.8	10.8
B4DXA1;Q13227;I3L4X7;I3L3Y9;I3L1H4	B4DXA1;Q13227;I3L4X7;I3L3Y9	6;6;5;5;1	6;6;5;5;1	6;6;5;5;1	G protein pathway suppressor 2	GPS2	>tr|B4DXA1|B4DXA1_HUMAN G protein pathway suppressor 2 OS=Homo sapiens GN=GPS2 PE=2 SV=1;>sp|Q13227|GPS2_HUMAN G protein pathway suppressor 2 OS=Homo sapiens GN=GPS2 PE=1 SV=3;>tr|I3L4X7|I3L4X7_HUMAN G protein pathway suppressor 2 (Fragment) OS=Homo sapien	5	6	6	6	3	3	5	4	3	5	4	5	3	4	3	4	3	3	5	4	3	5	4	5	3	4	3	4	3	3	5	4	3	5	4	5	3	4	3	4	27.4	27.4
E9PNU1;B4DXC8;Q9Y5B8-2;Q9Y5B8	E9PNU1;B4DXC8;Q9Y5B8-2;Q9Y5B8	2;2;2;2	2;2;2;2	2;2;2;2	Nucleoside diphosphate kinase 7	NME7	>tr|E9PNU1|E9PNU1_HUMAN Nucleoside diphosphate kinase 7 OS=Homo sapiens GN=NME7 PE=3 SV=1;>tr|B4DXC8|B4DXC8_HUMAN Nucleoside diphosphate kinase 7 OS=Homo sapiens GN=NME7 PE=2 SV=1;>sp|Q9Y5B8-2|NDK7_HUMAN Isoform 2 of Nucleoside diphosphate kinase 7 OS=Homo	4	2	2	2	1	2	1	0	1	0	1	2	0	1	0	0	1	2	1	0	1	0	1	2	0	1	0	0	1	2	1	0	1	0	1	2	0	1	0	0	9	9
B4DXE2;O95816;A2A296	B4DXE2;O95816;A2A296	3;3;2	3;3;2	3;3;2	BAG family molecular chaperone regulator 2	BAG2	>tr|B4DXE2|B4DXE2_HUMAN BAG family molecular chaperone regulator 2 OS=Homo sapiens GN=BAG2 PE=2 SV=1;>sp|O95816|BAG2_HUMAN BAG family molecular chaperone regulator 2 OS=Homo sapiens GN=BAG2 PE=1 SV=1;>tr|A2A296|A2A296_HUMAN BAG family molecular chaperone r	3	3	3	3	2	2	1	1	2	1	1	0	0	1	2	2	2	2	1	1	2	1	1	0	0	1	2	2	2	2	1	1	2	1	1	0	0	1	2	2	18	18
G3V3U4;G3V3I1;G3V295;G3V5Z7;B4DXJ9;P60900	G3V3U4;G3V3I1;G3V295;G3V5Z7;B4DXJ9;P60900	2;2;2;2;2;2	2;2;2;2;2;2	2;2;2;2;2;2	Proteasome subunit alpha type;Proteasome subunit alpha type-6	PSMA6	>tr|G3V3U4|G3V3U4_HUMAN Proteasome subunit alpha type OS=Homo sapiens GN=PSMA6 PE=3 SV=1;>tr|G3V3I1|G3V3I1_HUMAN Proteasome subunit alpha type OS=Homo sapiens GN=PSMA6 PE=3 SV=1;>tr|G3V295|G3V295_HUMAN Proteasome subunit alpha type OS=Homo sapiens GN=PSMA6	6	2	2	2	2	2	2	2	2	2	2	2	1	1	2	2	2	2	2	2	2	2	2	2	1	1	2	2	2	2	2	2	2	2	2	2	1	1	2	2	23.4	23.4
H3BRU6;F8VZX2;B4DXP5;G3V0E8;Q15366-4;Q15366-5;Q15366-3;Q15366;Q15366-2;F8W0G4;F8W1G6;B4DRD7;B4DLC0;F8VXH9;F8VRG9;E9PFP8;P57721-2;P57721-3;P57721-5;P57721-4;P57721;F8VTZ0;F8VWQ4;H9KV40;H3BSP4;C9K0A2;F8WC71;C9IZV9;C9J7A9;C9JSA6;C9J5V4;H3BND9;C9JTY5;C9JZY3;H3BSS4;F8VRH0;C9J0A4;E7EST1;P57723-2;P57723	H3BRU6;F8VZX2;B4DXP5;G3V0E8;Q15366-4;Q15366-5;Q15366-3;Q15366;Q15366-2;F8W0G4;F8W1G6;B4DRD7;B4DLC0;F8VXH9;F8VRG9;E9PFP8;P57721-2;P57721-3;P57721-5;P57721-4;P57721	5;5;5;5;5;5;5;5;5;4;4;4;4;3;3;3;3;3;3;3;3;2;2;2;1;1;1;1;1;1;1;1;1;1;1;1;1;1;1;1	5;5;5;5;5;5;5;5;5;4;4;4;4;3;3;3;3;3;3;3;3;2;2;2;1;1;1;1;1;1;1;1;1;1;1;1;1;1;1;1	3;3;3;3;3;3;3;3;3;2;2;3;2;2;2;1;1;1;1;1;1;0;2;1;0;0;0;0;0;0;0;1;0;0;1;1;0;0;0;0	Poly(rC)-binding protein 2;Poly(rC)-binding protein 3	PCBP2;PCBP3	>tr|H3BRU6|H3BRU6_HUMAN Poly(rC)-binding protein 2 (Fragment) OS=Homo sapiens GN=PCBP2 PE=4 SV=1;>tr|F8VZX2|F8VZX2_HUMAN Poly(rC)-binding protein 2 OS=Homo sapiens GN=PCBP2 PE=4 SV=1;>tr|B4DXP5|B4DXP5_HUMAN Poly(rC)-binding protein 2 OS=Homo sapiens GN=PCB	40	5	5	3	2	4	3	4	3	2	3	4	1	3	2	3	2	4	3	4	3	2	3	4	1	3	2	3	1	3	2	2	2	2	2	2	1	2	2	2	18.9	18.9
E7EU85;E9PFF5;B4DXZ6;P51114-3;P51114-2;P51114;P51116;F8W871;A8MQB8;G3V0J0;Q06787-8;Q06787-6;Q06787-2;Q06787-4;Q06787-5;G8JL90;Q06787-7;Q06787-3;Q06787	E7EU85;E9PFF5;B4DXZ6;P51114-3;P51114-2;P51114;P51116	4;4;4;4;4;4;2;1;1;1;1;1;1;1;1;1;1;1;1	4;4;4;4;4;4;2;1;1;1;1;1;1;1;1;1;1;1;1	4;4;4;4;4;4;2;1;1;1;1;1;1;1;1;1;1;1;1	Fragile X mental retardation syndrome-related protein 1;Fragile X mental retardation syndrome-related protein 2	FXR1;FXR2	>tr|E7EU85|E7EU85_HUMAN Fragile X mental retardation syndrome-related protein 1 OS=Homo sapiens GN=FXR1 PE=4 SV=1;>tr|E9PFF5|E9PFF5_HUMAN Fragile X mental retardation syndrome-related protein 1 OS=Homo sapiens GN=FXR1 PE=4 SV=1;>tr|B4DXZ6|B4DXZ6_HUMAN Frag	19	4	4	4	1	3	2	3	2	2	2	3	3	0	1	2	1	3	2	3	2	2	2	3	3	0	1	2	1	3	2	3	2	2	2	3	3	0	1	2	9.9	9.9
Q92598-2;Q92598;B4DYH1;Q92598-3;E7EUG1;B4DY72;Q5TBM3;F2Z3D7;D6RJ96;E9PDE8;E7ES43;O95757	Q92598-2;Q92598;B4DYH1;Q92598-3;E7EUG1;B4DY72	16;16;16;15;12;9;1;1;1;1;1;1	16;16;16;15;12;9;1;1;1;1;1;1	15;15;15;14;11;8;1;1;0;0;0;0	Heat shock protein 105 kDa	HSPH1	>sp|Q92598-2|HS105_HUMAN Isoform Beta of Heat shock protein 105 kDa OS=Homo sapiens GN=HSPH1;>sp|Q92598|HS105_HUMAN Heat shock protein 105 kDa OS=Homo sapiens GN=HSPH1 PE=1 SV=1;>tr|B4DYH1|B4DYH1_HUMAN Heat shock 105kDa/110kDa protein 1, isoform CRA_b OS=H	12	16	16	15	11	10	12	12	12	9	10	8	7	10	8	8	11	10	12	12	12	9	10	8	7	10	8	8	10	10	12	11	11	8	9	8	6	10	8	8	25.8	25.8
F8W9P3;C9JLJ5;C9JSX9;C9JLD7;B4DYJ6;G5E9G6;Q14669;Q14CA3;Q14CF1	F8W9P3;C9JLJ5;C9JSX9;C9JLD7;B4DYJ6;G5E9G6;Q14669;Q14CA3;Q14CF1	2;2;2;2;2;2;2;2;1	2;2;2;2;2;2;2;2;1	2;2;2;2;2;2;2;2;1	E3 ubiquitin-protein ligase TRIP12	TRIP12	>tr|F8W9P3|F8W9P3_HUMAN Probable E3 ubiquitin-protein ligase TRIP12 (Fragment) OS=Homo sapiens GN=TRIP12 PE=4 SV=1;>tr|C9JLJ5|C9JLJ5_HUMAN Probable E3 ubiquitin-protein ligase TRIP12 (Fragment) OS=Homo sapiens GN=TRIP12 PE=4 SV=1;>tr|C9JSX9|C9JSX9_HUMAN Pr	9	2	2	2	1	1	2	2	0	2	2	1	0	2	2	2	1	1	2	2	0	2	2	1	0	2	2	2	1	1	2	2	0	2	2	1	0	2	2	2	28.3	28.3
B4DYR1;P78504	B4DYR1;P78504	1;1	1;1	1;1	Protein jagged-1	JAG1	>tr|B4DYR1|B4DYR1_HUMAN Protein jagged-1 OS=Homo sapiens GN=JAG1 PE=2 SV=1;>sp|P78504|JAG1_HUMAN Protein jagged-1 OS=Homo sapiens GN=JAG1 PE=1 SV=3	2	1	1	1	1	1	1	1	0	0	0	0	0	1	1	1	1	1	1	1	0	0	0	0	0	1	1	1	1	1	1	1	0	0	0	0	0	1	1	1	1.3	1.3
Q5JRC6;Q8IWS0-2;B4E0G4;Q8IWS0;E9PC97	Q5JRC6;Q8IWS0-2;B4E0G4;Q8IWS0;E9PC97	2;2;2;2;2	2;2;2;2;2	2;2;2;2;2	PHD finger protein 6	PHF6	>tr|Q5JRC6|Q5JRC6_HUMAN PHD finger protein 6 OS=Homo sapiens GN=PHF6 PE=2 SV=1;>sp|Q8IWS0-2|PHF6_HUMAN Isoform 2 of PHD finger protein 6 OS=Homo sapiens GN=PHF6;>tr|B4E0G4|B4E0G4_HUMAN PHD finger protein 6 OS=Homo sapiens GN=PHF6 PE=2 SV=1;>sp|Q8IWS0|PHF6_	5	2	2	2	0	0	1	1	2	2	2	2	1	1	1	0	0	0	1	1	2	2	2	2	1	1	1	0	0	0	1	1	2	2	2	2	1	1	1	0	7.4	7.4
B4E0H8;P26006;P26006-1;D6R9X8	B4E0H8;P26006;P26006-1;D6R9X8	2;2;2;1	2;2;2;1	2;2;2;1	Integrin alpha-3;Integrin alpha-3 heavy chain;Integrin alpha-3 light chain	ITGA3	>tr|B4E0H8|B4E0H8_HUMAN Integrin alpha-3 OS=Homo sapiens GN=ITGA3 PE=2 SV=1;>sp|P26006|ITA3_HUMAN Integrin alpha-3 OS=Homo sapiens GN=ITGA3 PE=1 SV=5;>sp|P26006-1|ITA3_HUMAN Isoform 2 of Integrin alpha-3 OS=Homo sapiens GN=ITGA3;>tr|D6R9X8|D6R9X8_HUMAN Int	4	2	2	2	0	0	1	0	0	0	2	0	0	0	1	0	0	0	1	0	0	0	2	0	0	0	1	0	0	0	1	0	0	0	2	0	0	0	1	0	3	3
G3XAN4;B4E0K2;Q15629	G3XAN4;B4E0K2;Q15629	4;4;4	4;4;4	4;4;4	Translocating chain-associated membrane protein 1	TRAM1	>tr|G3XAN4|G3XAN4_HUMAN Translocating chain-associated membrane protein 1 OS=Homo sapiens GN=TRAM1 PE=4 SV=1;>tr|B4E0K2|B4E0K2_HUMAN Translocating chain-associated membrane protein 1 OS=Homo sapiens GN=TRAM1 PE=2 SV=1;>sp|Q15629|TRAM1_HUMAN Translocating c	3	4	4	4	1	2	2	3	1	1	2	2	1	1	2	2	1	2	2	3	1	1	2	2	1	1	2	2	1	2	2	3	1	1	2	2	1	1	2	2	15.3	15.3
B4E0K6;E7ERL9;F8W0F9	B4E0K6;E7ERL9;F8W0F9	41;41;34	2;2;2	1;1;1			>tr|B4E0K6|B4E0K6_HUMAN Valine--tRNA ligase, mitochondrial OS=Homo sapiens GN=VARS2 PE=2 SV=1;>tr|E7ERL9|E7ERL9_HUMAN Uncharacterized protein OS=Homo sapiens GN=VARS2 PE=3 SV=1;>tr|F8W0F9|F8W0F9_HUMAN Valine--tRNA ligase, mitochondrial OS=Homo sapiens GN=V	3	41	2	1	36	40	38	34	38	38	41	38	35	38	38	38	2	2	2	2	2	2	2	2	1	2	2	2	1	1	1	1	1	1	1	1	1	1	1	1	49.2	2.1
B4E0Y4;P22003	B4E0Y4;P22003	5;5	5;5	4;4	Bone morphogenetic protein 5	BMP5	>tr|B4E0Y4|B4E0Y4_HUMAN Bone morphogenetic protein 5 OS=Homo sapiens GN=BMP5 PE=2 SV=1;>sp|P22003|BMP5_HUMAN Bone morphogenetic protein 5 OS=Homo sapiens GN=BMP5 PE=2 SV=1	2	5	5	4	0	0	1	0	4	2	4	5	1	0	1	2	0	0	1	0	4	2	4	5	1	0	1	2	0	0	1	0	3	2	3	4	1	0	1	1	15.3	15.3
B4E1G1;Q9BUN8-2;Q9BUN8;E5RGY0	B4E1G1;Q9BUN8-2;Q9BUN8	5;5;5;2	5;5;5;2	5;5;5;2	Derlin-1	DERL1	>tr|B4E1G1|B4E1G1_HUMAN Derlin-1 OS=Homo sapiens GN=DERL1 PE=2 SV=1;>sp|Q9BUN8-2|DERL1_HUMAN Isoform 2 of Derlin-1 OS=Homo sapiens GN=DERL1;>sp|Q9BUN8|DERL1_HUMAN Derlin-1 OS=Homo sapiens GN=DERL1 PE=1 SV=1	4	5	5	5	4	4	4	3	2	3	4	3	4	4	3	2	4	4	4	3	2	3	4	3	4	4	3	2	4	4	4	3	2	3	4	3	4	4	3	2	31.8	31.8
B4E1K0;H7BYN4;Q02241-2;Q02241	B4E1K0;H7BYN4;Q02241-2;Q02241	2;2;2;2	2;2;2;2	2;2;2;2	Kinesin-like protein KIF23	KIF23	>tr|B4E1K0|B4E1K0_HUMAN Kinesin-like protein KIF23 OS=Homo sapiens GN=KIF23 PE=2 SV=1;>tr|H7BYN4|H7BYN4_HUMAN Kinesin-like protein KIF23 OS=Homo sapiens GN=KIF23 PE=3 SV=1;>sp|Q02241-2|KIF23_HUMAN Isoform 2 of Kinesin-like protein KIF23 OS=Homo sapiens GN=	4	2	2	2	1	1	1	1	2	1	0	0	2	0	0	0	1	1	1	1	2	1	0	0	2	0	0	0	1	1	1	1	2	1	0	0	2	0	0	0	4.3	4.3
B4E1K7;Q9UJZ1	B4E1K7;Q9UJZ1	3;3	3;3	3;3	Stomatin-like protein 2, mitochondrial	STOML2	>tr|B4E1K7|B4E1K7_HUMAN Stomatin-like protein 2 OS=Homo sapiens GN=STOML2 PE=2 SV=1;>sp|Q9UJZ1|STML2_HUMAN Stomatin-like protein 2 OS=Homo sapiens GN=STOML2 PE=1 SV=1	2	3	3	3	1	2	1	0	0	1	3	1	2	2	2	2	1	2	1	0	0	1	3	1	2	2	2	2	1	2	1	0	0	1	3	1	2	2	2	2	15.4	15.4
B4E241;P84103	B4E241;P84103	7;7	7;7	6;6	Serine/arginine-rich splicing factor 3	SRSF3	>tr|B4E241|B4E241_HUMAN Serine/arginine-rich-splicing factor 3 OS=Homo sapiens GN=SRSF3 PE=2 SV=1;>sp|P84103|SRSF3_HUMAN Serine/arginine-rich splicing factor 3 OS=Homo sapiens GN=SRSF3 PE=1 SV=1	2	7	7	6	3	3	4	4	5	5	4	5	4	5	4	4	3	3	4	4	5	5	4	5	4	5	4	4	2	2	3	3	4	4	3	4	4	4	3	3	46.8	46.8
G3XAM7;B4E2G8;F6XBD8;P35221;P35221-2;E5RJZ2;E5RIT8;E5RFM3;E5RJL0;E5RIE0;E5RHV7;E5RGY6;E5RG03;E5RIC3;E5RIB1;F8W845;Q8N1C0	G3XAM7;B4E2G8;F6XBD8;P35221;P35221-2;E5RJZ2;E5RIT8;E5RFM3;E5RJL0;E5RIE0;E5RHV7;E5RGY6;E5RG03;E5RIC3;E5RIB1;F8W845;Q8N1C0	2;2;2;2;2;1;1;1;1;1;1;1;1;1;1;1;1	2;2;2;2;2;1;1;1;1;1;1;1;1;1;1;1;1	2;2;2;2;2;1;1;1;1;1;1;1;1;1;1;1;1	Catenin alpha-1	CTNNA1	>tr|G3XAM7|G3XAM7_HUMAN Catenin (Cadherin-associated protein), alpha 1, 102kDa, isoform CRA_a OS=Homo sapiens GN=CTNNA1 PE=4 SV=1;>tr|B4E2G8|B4E2G8_HUMAN Catenin alpha-1 OS=Homo sapiens GN=CTNNA1 PE=2 SV=1;>tr|F6XBD8|F6XBD8_HUMAN Catenin alpha-1 OS=Homo sa	17	2	2	2	1	0	2	0	1	0	0	2	0	0	0	1	1	0	2	0	1	0	0	2	0	0	0	1	1	0	2	0	1	0	0	2	0	0	0	1	2.4	2.4
C9JA28;Q9UNL2;B4E2P2	C9JA28;Q9UNL2;B4E2P2	1;1;1	1;1;1	1;1;1	Translocon-associated protein subunit gamma	SSR3	>tr|C9JA28|C9JA28_HUMAN Translocon-associated protein subunit gamma OS=Homo sapiens GN=SSR3 PE=4 SV=1;>sp|Q9UNL2|SSRG_HUMAN Translocon-associated protein subunit gamma OS=Homo sapiens GN=SSR3 PE=1 SV=1;>tr|B4E2P2|B4E2P2_HUMAN Translocon-associated protein	3	1	1	1	1	1	0	1	1	0	1	1	0	0	1	1	1	1	0	1	1	0	1	1	0	0	1	1	1	1	0	1	1	0	1	1	0	0	1	1	8	8
B4E2V4;P28066	B4E2V4;P28066	2;2	2;2	2;2	Proteasome subunit alpha type-5	PSMA5	>tr|B4E2V4|B4E2V4_HUMAN Proteasome (Prosome, macropain) subunit, alpha type, 5, isoform CRA_c OS=Homo sapiens GN=PSMA5 PE=2 SV=1;>sp|P28066|PSA5_HUMAN Proteasome subunit alpha type-5 OS=Homo sapiens GN=PSMA5 PE=1 SV=3	2	2	2	2	1	1	1	1	1	2	1	1	1	1	1	1	1	1	1	1	1	2	1	1	1	1	1	1	1	1	1	1	1	2	1	1	1	1	1	1	14.2	14.2
B4E2W0;P55084;F5GZQ3;B5MD38;C9JEY0;C9JE81;C9K0M0	B4E2W0;P55084;F5GZQ3;B5MD38	22;22;18;14;7;7;4	22;22;18;14;7;7;4	22;22;18;14;7;7;4	Trifunctional enzyme subunit beta, mitochondrial;3-ketoacyl-CoA thiolase	HADHB	>tr|B4E2W0|B4E2W0_HUMAN 3-ketoacyl-CoA thiolase OS=Homo sapiens GN=HADHB PE=2 SV=1;>sp|P55084|ECHB_HUMAN Trifunctional enzyme subunit beta, mitochondrial OS=Homo sapiens GN=HADHB PE=1 SV=3;>tr|F5GZQ3|F5GZQ3_HUMAN 3-ketoacyl-CoA thiolase OS=Homo sapiens GN=	7	22	22	22	14	16	19	13	13	20	19	16	16	18	20	18	14	16	19	13	13	20	19	16	16	18	20	18	14	16	19	13	13	20	19	16	16	18	20	18	55.1	55.1
B4E2Z3;F5GZS6;P08195-2;P08195-3;P08195;P08195-4;F5GZI0;H0YFS2;F5H0E2;H0YFX4;F5H867	B4E2Z3;F5GZS6;P08195-2;P08195-3;P08195;P08195-4	10;10;10;10;10;10;4;3;2;1;1	10;10;10;10;10;10;4;3;2;1;1	10;10;10;10;10;10;4;3;2;1;1	4F2 cell-surface antigen heavy chain	SLC3A2	>tr|B4E2Z3|B4E2Z3_HUMAN 4F2 cell-surface antigen heavy chain OS=Homo sapiens GN=SLC3A2 PE=2 SV=1;>tr|F5GZS6|F5GZS6_HUMAN 4F2 cell-surface antigen heavy chain OS=Homo sapiens GN=SLC3A2 PE=4 SV=1;>sp|P08195-2|4F2_HUMAN Isoform 2 of 4F2 cell-surface antigen h	11	10	10	10	6	5	5	1	9	6	9	7	4	6	7	7	6	5	5	1	9	6	9	7	4	6	7	7	6	5	5	1	9	6	9	7	4	6	7	7	28.8	28.8
B4E3E5;Q92997;F5GWR8;F8WCF1;C9K0P9;I3L0M7;I3L2W9;I3L2N2;P54792-2;P54792;O14640-2;O14640;O14641;F2Z380	B4E3E5;Q92997;F5GWR8	16;16;15;4;3;2;2;2;2;2;2;2;2;1	16;16;15;4;3;2;2;2;2;2;2;2;2;1	16;16;15;4;3;2;2;2;2;2;2;2;2;1	Segment polarity protein dishevelled homolog DVL-3	DVL3	>tr|B4E3E5|B4E3E5_HUMAN Segment polarity protein dishevelled homolog DVL-3 OS=Homo sapiens GN=DVL3 PE=2 SV=1;>sp|Q92997|DVL3_HUMAN Segment polarity protein dishevelled homolog DVL-3 OS=Homo sapiens GN=DVL3 PE=1 SV=2;>tr|F5GWR8|F5GWR8_HUMAN Segment polarity	14	16	16	16	9	10	13	14	10	10	12	15	10	12	8	13	9	10	13	14	10	10	12	15	10	12	8	13	9	10	13	14	10	10	12	15	10	12	8	13	36.1	36.1
E7EMS4;E7EP33;O95644-8;O95644-3;B5B2M6;O95644-2;O95644-5;O95644-4;O95644-6;O95644;F5H4S8	E7EMS4;E7EP33;O95644-8;O95644-3;B5B2M6;O95644-2;O95644-5;O95644-4;O95644-6;O95644;F5H4S8	2;2;2;2;2;2;2;2;2;2;1	2;2;2;2;2;2;2;2;2;2;1	2;2;2;2;2;2;2;2;2;2;1	Nuclear factor of activated T-cells, cytoplasmic 1	NFATC1	>tr|E7EMS4|E7EMS4_HUMAN Nuclear factor of-activated T-cells, cytoplasmic 1 OS=Homo sapiens GN=NFATC1 PE=4 SV=1;>tr|E7EP33|E7EP33_HUMAN Nuclear factor of-activated T-cells, cytoplasmic 1 (Fragment) OS=Homo sapiens GN=NFATC1 PE=4 SV=1;>sp|O95644-8|NFAC1_HUMA	11	2	2	2	0	0	2	0	0	0	0	1	1	0	0	1	0	0	2	0	0	0	0	1	1	0	0	1	0	0	2	0	0	0	0	1	1	0	0	1	3.7	3.7
B5M452;E9PGC1;E9PFN4;Q9Y6M7-2;Q9Y6M7;Q9Y6M7-4;C9JRP1;B6DY53;B6DY52;E7EW28;C9JV56;C9J240;C9JZZ4;Q6U841-2;F8W675;Q6U841	B5M452;E9PGC1;E9PFN4;Q9Y6M7-2;Q9Y6M7;Q9Y6M7-4;C9JRP1;B6DY53;B6DY52	33;32;32;31;30;28;26;20;19;1;1;1;1;1;1;1	1;1;1;1;1;1;0;0;0;0;0;0;0;0;0;0	1;1;1;1;1;1;0;0;0;0;0;0;0;0;0;0	Sodium bicarbonate cotransporter 3	SLC4A7	>tr|B5M452|B5M452_HUMAN Sodium bicarbonate cotransporter 3 OS=Homo sapiens GN=SLC4A7 PE=2 SV=1;>tr|E9PGC1|E9PGC1_HUMAN Sodium bicarbonate cotransporter 3 OS=Homo sapiens GN=SLC4A7 PE=4 SV=1;>tr|E9PFN4|E9PFN4_HUMAN Sodium bicarbonate cotransporter 3 OS=Homo	16	33	1	1	28	31	29	30	26	28	28	30	28	30	31	30	1	1	1	1	1	0	1	1	1	1	1	0	1	1	1	1	1	0	1	1	1	1	1	0	37.5	0.9
B5MCF1;C9JS87;G8JL94;E7EX34;F8W9E0;Q9UKV0-8;Q9UKV0-3;Q9UKV0-6;Q9UKV0-7;Q9UKV0-4;Q9UKV0;Q9UKV0-5;H0Y2W0;Q9UKV0-2;C9J835;C9IZS0;C9J1W4	B5MCF1;C9JS87;G8JL94;E7EX34;F8W9E0;Q9UKV0-8;Q9UKV0-3;Q9UKV0-6;Q9UKV0-7;Q9UKV0-4;Q9UKV0;Q9UKV0-5;H0Y2W0;Q9UKV0-2	6;6;5;5;5;5;5;5;5;4;4;4;3;3;1;1;1	6;6;5;5;5;5;5;5;5;4;4;4;3;3;1;1;1	6;6;5;5;5;5;5;5;5;4;4;4;3;3;1;1;1	Histone deacetylase 9	HDAC9	>tr|B5MCF1|B5MCF1_HUMAN Histone deacetylase 9 OS=Homo sapiens GN=HDAC9 PE=4 SV=2;>tr|C9JS87|C9JS87_HUMAN Histone deacetylase 9 OS=Homo sapiens GN=HDAC9 PE=4 SV=2;>tr|G8JL94|G8JL94_HUMAN Histone deacetylase 9 OS=Homo sapiens GN=HDAC9 PE=4 SV=1;>tr|E7EX34|E7	17	6	6	6	3	2	4	2	4	4	5	4	4	4	1	4	3	2	4	2	4	4	5	4	4	4	1	4	3	2	4	2	4	4	5	4	4	4	1	4	16.8	16.8
B7Z254;Q15084;F8WA83;B5MCQ5;Q15084-2	B7Z254;Q15084;F8WA83;B5MCQ5;Q15084-2	11;11;11;11;11	11;11;11;11;11	11;11;11;11;11	Protein disulfide-isomerase A6	PDIA6	>tr|B7Z254|B7Z254_HUMAN Protein disulfide-isomerase A6 OS=Homo sapiens GN=PDIA6 PE=2 SV=1;>sp|Q15084|PDIA6_HUMAN Protein disulfide-isomerase A6 OS=Homo sapiens GN=PDIA6 PE=1 SV=1;>tr|F8WA83|F8WA83_HUMAN Protein disulfide-isomerase A6 OS=Homo sapiens GN=PDI	5	11	11	11	8	6	9	4	9	8	11	10	5	7	9	8	8	6	9	4	9	8	11	10	5	7	9	8	8	6	9	4	9	8	11	10	5	7	9	8	35	35
B5MCR8;B7Z901;Q6NXT4;Q6NXT4-2;Q6NXT4-3;B3KU87;C9JZR9	B5MCR8;B7Z901;Q6NXT4;Q6NXT4-2;Q6NXT4-3;B3KU87	10;10;10;10;9;6;4	10;10;10;10;9;6;4	10;10;10;10;9;6;4	Zinc transporter 6	SLC30A6	>tr|B5MCR8|B5MCR8_HUMAN Solute carrier family 30 (Zinc transporter), member 6, isoform CRA_b OS=Homo sapiens GN=SLC30A6 PE=4 SV=1;>tr|B7Z901|B7Z901_HUMAN Zinc transporter 6 OS=Homo sapiens GN=SLC30A6 PE=2 SV=1;>sp|Q6NXT4|ZNT6_HUMAN Zinc transporter 6 OS=Ho	7	10	10	10	8	9	9	9	8	9	9	8	8	9	8	10	8	9	9	9	8	9	9	8	8	9	8	10	8	9	9	9	8	9	9	8	8	9	8	10	37.2	37.2
H7C310;C9J2Q4;B5MCX3;Q15019;Q15019-2;C9IY94;C9J938;C9JB25;H7C2Y0	H7C310;C9J2Q4;B5MCX3;Q15019;Q15019-2;C9IY94;C9J938;C9JB25;H7C2Y0	2;2;2;2;2;1;1;1;1	2;2;2;2;2;1;1;1;1	2;2;2;2;2;1;1;1;1	Septin-2	2002-09-01	>tr|H7C310|H7C310_HUMAN Septin-2 (Fragment) OS=Homo sapiens GN=SEPT2 PE=4 SV=1;>tr|C9J2Q4|C9J2Q4_HUMAN Septin-2 (Fragment) OS=Homo sapiens GN=SEPT2 PE=4 SV=1;>tr|B5MCX3|B5MCX3_HUMAN Septin-2 OS=Homo sapiens GN=SEPT2 PE=3 SV=1;>sp|Q15019|SEPT2_HUMAN Septin-	9	2	2	2	2	2	1	0	2	2	2	2	0	0	1	1	2	2	1	0	2	2	2	2	0	0	1	1	2	2	1	0	2	2	2	2	0	0	1	1	12.4	12.4
B5MDE0;Q96AA3	B5MDE0;Q96AA3	2;2	2;2	2;2	Protein RFT1 homolog	RFT1	>tr|B5MDE0|B5MDE0_HUMAN Protein RFT1 homolog OS=Homo sapiens GN=RFT1 PE=4 SV=1;>sp|Q96AA3|RFT1_HUMAN Protein RFT1 homolog OS=Homo sapiens GN=RFT1 PE=1 SV=1	2	2	2	2	1	1	2	1	2	1	2	1	0	1	2	0	1	1	2	1	2	1	2	1	0	1	2	0	1	1	2	1	2	1	2	1	0	1	2	0	3.6	3.6
B5MDF5;P62826;F5H018;H0YFC6;B4DV51	B5MDF5;P62826;F5H018;H0YFC6;B4DV51	4;4;3;2;2	4;4;3;2;2	4;4;3;2;2	GTP-binding nuclear protein Ran	RAN	>tr|B5MDF5|B5MDF5_HUMAN GTP-binding nuclear protein Ran OS=Homo sapiens GN=RAN PE=4 SV=1;>sp|P62826|RAN_HUMAN GTP-binding nuclear protein Ran OS=Homo sapiens GN=RAN PE=1 SV=3;>tr|F5H018|F5H018_HUMAN GTP-binding nuclear protein Ran (Fragment) OS=Homo sapien	5	4	4	4	3	2	2	1	2	1	3	4	0	4	3	1	3	2	2	1	2	1	3	4	0	4	3	1	3	2	2	1	2	1	3	4	0	4	3	1	19.7	19.7
B5MEH6;Q96KR1	B5MEH6;Q96KR1	1;1	1;1	1;1	Zinc finger RNA-binding protein	ZFR	>tr|B5MEH6|B5MEH6_HUMAN Zinc finger RNA-binding protein OS=Homo sapiens GN=ZFR PE=4 SV=1;>sp|Q96KR1|ZFR_HUMAN Zinc finger RNA-binding protein OS=Homo sapiens GN=ZFR PE=1 SV=2	2	1	1	1	0	0	1	0	0	0	0	0	1	0	0	1	0	0	1	0	0	0	0	0	1	0	0	1	0	0	1	0	0	0	0	0	1	0	0	1	1.6	1.6
C9J4X5;B6ZDS1;Q9H160;Q96EU6-2;Q96EU6	C9J4X5;B6ZDS1;Q9H160;Q96EU6-2;Q96EU6	2;2;2;1;1	2;2;2;1;1	2;2;2;1;1	Inhibitor of growth protein 2;Ribosomal RNA processing protein 36 homolog	ING2;RRP36	>tr|C9J4X5|C9J4X5_HUMAN Inhibitor of growth protein 2 (Fragment) OS=Homo sapiens GN=ING2 PE=4 SV=1;>tr|B6ZDS1|B6ZDS1_HUMAN ING2 splice variant 1 OS=Homo sapiens GN=ING2b PE=2 SV=1;>sp|Q9H160|ING2_HUMAN Inhibitor of growth protein 2 OS=Homo sapiens GN=ING2	5	2	2	2	0	1	0	0	0	1	1	1	0	1	1	1	0	1	0	0	0	1	1	1	0	1	1	1	0	1	0	0	0	1	1	1	0	1	1	1	13.8	13.8
H9KV75;P12814-2;P12814;P12814-3;B7TY16;E7EV83;O43707;G3V2W4;G3V2N5;H7C5W8;G3V2E8;G3V5M4;G3V2X9;D6PXK4;P35609;B2RCS5;Q08043;H0YJ11;H0YJW3;H0YGN3	H9KV75;P12814-2;P12814;P12814-3;B7TY16;E7EV83;O43707;G3V2W4	8;8;8;8;8;5;5;4;3;3;2;2;2;2;2;2;2;1;1;1	8;8;8;8;8;5;5;4;3;3;2;2;2;2;2;2;2;1;1;1	8;8;8;8;8;5;5;4;3;3;2;2;2;2;2;2;2;1;1;1	Alpha-actinin-1;Alpha-actinin-4	ACTN1;ACTN4	>tr|H9KV75|H9KV75_HUMAN Alpha-actinin-1 OS=Homo sapiens GN=ACTN1 PE=4 SV=1;>sp|P12814-2|ACTN1_HUMAN Isoform 2 of Alpha-actinin-1 OS=Homo sapiens GN=ACTN1;>sp|P12814|ACTN1_HUMAN Alpha-actinin-1 OS=Homo sapiens GN=ACTN1 PE=1 SV=2;>sp|P12814-3|ACTN1_HUMAN Iso	20	8	8	8	1	0	1	0	1	3	5	4	0	3	2	2	1	0	1	0	1	3	5	4	0	3	2	2	1	0	1	0	1	3	5	4	0	3	2	2	12.3	12.3
B7WP27;Q9HCG8	B7WP27;Q9HCG8	1;1	1;1	1;1	Pre-mRNA-splicing factor CWC22 homolog	CWC22	>tr|B7WP27|B7WP27_HUMAN Pre-mRNA-splicing factor CWC22 homolog OS=Homo sapiens GN=CWC22 PE=4 SV=1;>sp|Q9HCG8|CWC22_HUMAN Pre-mRNA-splicing factor CWC22 homolog OS=Homo sapiens GN=CWC22 PE=1 SV=3	2	1	1	1	1	0	0	0	1	0	0	1	0	0	0	0	1	0	0	0	1	0	0	1	0	0	0	0	1	0	0	0	1	0	0	1	0	0	0	0	1.2	1.2
Q15370;B7WPD3;B8ZZU8;I3L0M9	Q15370;B7WPD3;B8ZZU8;I3L0M9	5;5;4;4	5;5;4;4	5;5;4;4	Transcription elongation factor B polypeptide 2	TCEB2	>sp|Q15370|ELOB_HUMAN Transcription elongation factor B polypeptide 2 OS=Homo sapiens GN=TCEB2 PE=1 SV=1;>tr|B7WPD3|B7WPD3_HUMAN Transcription elongation factor B (SIII), polypeptide 2 (18kDa, elongin B), isoform CRA_a OS=Homo sapiens GN=TCEB2 PE=4 SV=1;>t	4	5	5	5	4	4	4	4	4	3	3	3	4	4	3	4	4	4	4	4	4	3	3	3	4	4	3	4	4	4	4	4	4	3	3	3	4	4	3	4	43.2	43.2
B7WPH3;E2QRE6;Q9BXF3-3;Q9BXF3	B7WPH3;E2QRE6;Q9BXF3-3;Q9BXF3	1;1;1;1	1;1;1;1	1;1;1;1	Cat eye syndrome critical region protein 2	CECR2	>tr|B7WPH3|B7WPH3_HUMAN Cat eye syndrome critical region protein 2 OS=Homo sapiens GN=CECR2 PE=4 SV=2;>tr|E2QRE6|E2QRE6_HUMAN Cat eye syndrome critical region protein 2 OS=Homo sapiens GN=CECR2 PE=4 SV=1;>sp|Q9BXF3-3|CECR2_HUMAN Isoform C of Cat eye syndro	4	1	1	1	1	0	1	0	0	1	1	1	0	1	1	1	1	0	1	0	0	1	1	1	0	1	1	1	1	0	1	0	0	1	1	1	0	1	1	1	1.6	1.6
B7Z1E3;F8W9E3;H7BXY2;H0YBA3;Q02297-11;Q02297-7;Q02297;Q02297-6;Q02297-2;E7EX30;E9PHH4;Q02297-3	B7Z1E3;F8W9E3;H7BXY2;H0YBA3;Q02297-11;Q02297-7;Q02297;Q02297-6;Q02297-2;E7EX30	4;4;4;4;4;4;4;4;4;2;1;1	4;4;4;4;4;4;4;4;4;2;1;1	4;4;4;4;4;4;4;4;4;2;1;1	Pro-neuregulin-1, membrane-bound isoform;Neuregulin-1	NRG1	>tr|B7Z1E3|B7Z1E3_HUMAN Neuregulin-1 OS=Homo sapiens GN=NRG1 PE=2 SV=1;>tr|F8W9E3|F8W9E3_HUMAN Neuregulin-1 OS=Homo sapiens GN=NRG1 PE=4 SV=1;>tr|H7BXY2|H7BXY2_HUMAN Neuregulin-1 OS=Homo sapiens GN=NRG1 PE=4 SV=1;>tr|H0YBA3|H0YBA3_HUMAN Neuregulin-1 (Fragm	12	4	4	4	1	2	3	0	3	1	1	0	1	0	1	0	1	2	3	0	3	1	1	0	1	0	1	0	1	2	3	0	3	1	1	0	1	0	1	0	11	11
B7Z1N3;F5GWY0;Q969N2-2;Q969N2-4;Q969N2-5;Q969N2	B7Z1N3;F5GWY0;Q969N2-2;Q969N2-4;Q969N2-5;Q969N2	3;3;3;3;3;3	3;3;3;3;3;3	3;3;3;3;3;3	GPI transamidase component PIG-T	PIGT	>tr|B7Z1N3|B7Z1N3_HUMAN GPI transamidase component PIG-T OS=Homo sapiens GN=PIGT PE=2 SV=1;>tr|F5GWY0|F5GWY0_HUMAN GPI transamidase component PIG-T OS=Homo sapiens GN=PIGT PE=4 SV=1;>sp|Q969N2-2|PIGT_HUMAN Isoform 2 of GPI transamidase component PIG-T OS=H	6	3	3	3	1	2	2	1	2	2	1	2	2	2	2	2	1	2	2	1	2	2	1	2	2	2	2	2	1	2	2	1	2	2	1	2	2	2	2	2	14.6	14.6
B7Z1P2;Q9H4M3-2;Q9H4M3	B7Z1P2;Q9H4M3-2;Q9H4M3	2;2;2	2;2;2	2;2;2	F-box only protein 44	FBXO44	>tr|B7Z1P2|B7Z1P2_HUMAN F-box only protein 44 OS=Homo sapiens GN=FBXO44 PE=2 SV=1;>sp|Q9H4M3-2|FBX44_HUMAN Isoform 2 of F-box only protein 44 OS=Homo sapiens GN=FBXO44;>sp|Q9H4M3|FBX44_HUMAN F-box only protein 44 OS=Homo sapiens GN=FBXO44 PE=1 SV=3	3	2	2	2	1	1	1	1	2	0	0	1	1	1	0	1	1	1	1	1	2	0	0	1	1	1	0	1	1	1	1	1	2	0	0	1	1	1	0	1	12.9	12.9
B7Z287;Q9NP50;F5H6U2;F5GZ82;Q9NP50-2	B7Z287;Q9NP50;F5H6U2;F5GZ82;Q9NP50-2	2;2;1;1;1	2;2;1;1;1	2;2;1;1;1	Protein FAM60A	FAM60A	>tr|B7Z287|B7Z287_HUMAN Protein FAM60A OS=Homo sapiens GN=FAM60A PE=2 SV=1;>sp|Q9NP50|FA60A_HUMAN Protein FAM60A OS=Homo sapiens GN=FAM60A PE=1 SV=1;>tr|F5H6U2|F5H6U2_HUMAN Protein FAM60A (Fragment) OS=Homo sapiens GN=FAM60A PE=4 SV=1;>tr|F5GZ82|F5GZ82_HUM	5	2	2	2	2	1	1	0	1	2	0	1	2	1	1	2	2	1	1	0	1	2	0	1	2	1	1	2	2	1	1	0	1	2	0	1	2	1	1	2	9.5	9.5
B7Z2A7;H7BYB2;Q5T8D3-4;Q5T8D3-2;Q5T8D3-3;Q5T8D3	B7Z2A7;H7BYB2;Q5T8D3-4;Q5T8D3-2;Q5T8D3-3;Q5T8D3	1;1;1;1;1;1	1;1;1;1;1;1	1;1;1;1;1;1	Acyl-CoA-binding domain-containing protein 5	ACBD5	>tr|B7Z2A7|B7Z2A7_HUMAN Acyl-CoA-binding domain-containing protein 5 OS=Homo sapiens GN=ACBD5 PE=2 SV=1;>tr|H7BYB2|H7BYB2_HUMAN Acyl-CoA-binding domain-containing protein 5 OS=Homo sapiens GN=ACBD5 PE=4 SV=1;>sp|Q5T8D3-4|ACBD5_HUMAN Isoform 4 of Acyl-CoA-b	6	1	1	1	1	0	1	1	0	1	1	0	0	1	0	1	1	0	1	1	0	1	1	0	0	1	0	1	1	0	1	1	0	1	1	0	0	1	0	1	2.9	2.9
F5H8B2;B7Z3C7;Q15052-2;Q15052	F5H8B2;B7Z3C7;Q15052-2;Q15052	6;6;6;6	2;2;2;2	2;2;2;2	Rho guanine nucleotide exchange factor 6	ARHGEF6	>tr|F5H8B2|F5H8B2_HUMAN Rho guanine nucleotide exchange factor 6 OS=Homo sapiens GN=ARHGEF6 PE=4 SV=1;>tr|B7Z3C7|B7Z3C7_HUMAN Rho guanine nucleotide exchange factor 6 OS=Homo sapiens GN=ARHGEF6 PE=2 SV=1;>sp|Q15052-2|ARHG6_HUMAN Isoform 2 of Rho guanine nu	4	6	2	2	3	5	3	3	5	3	3	3	3	4	4	5	0	1	0	0	2	0	0	0	0	1	1	1	0	1	0	0	2	0	0	0	0	1	1	1	10	3.9
B7Z4B8;Q9BUJ2-4;Q9BUJ2-2;Q9BUJ2;Q9BUJ2-3	B7Z4B8;Q9BUJ2-4;Q9BUJ2-2;Q9BUJ2;Q9BUJ2-3	11;11;11;11;9	11;11;11;11;9	11;11;11;11;9	Heterogeneous nuclear ribonucleoprotein U-like protein 1	HNRNPUL1	>tr|B7Z4B8|B7Z4B8_HUMAN Heterogeneous nuclear ribonucleoprotein U-like protein 1 OS=Homo sapiens GN=HNRNPUL1 PE=2 SV=1;>sp|Q9BUJ2-4|HNRL1_HUMAN Isoform 4 of Heterogeneous nuclear ribonucleoprotein U-like protein 1 OS=Homo sapiens GN=HNRNPUL1;>sp|Q9BUJ2-2|H	5	11	11	11	9	9	11	8	9	5	9	7	7	5	7	9	9	9	11	8	9	5	9	7	7	5	7	9	9	9	11	8	9	5	9	7	7	5	7	9	17.9	17.9
Q86SQ9-3;B7Z4B9;Q86SQ9;Q86SQ9-2;Q5T0A6;E9PHW1;Q5T0A3;Q5T0A2;E9PRS7;E9PI64;E9PR24;E9PI09;Q5T0A1;E9PKJ5;E9PL99;Q5T0A0;E9PSH7;H0Y4T1;E9PHW0;E9PHV9	Q86SQ9-3;B7Z4B9;Q86SQ9;Q86SQ9-2;Q5T0A6;E9PHW1;Q5T0A3;Q5T0A2	5;5;5;5;3;3;3;3;2;2;2;2;2;1;1;1;1;1;1;1	5;5;5;5;3;3;3;3;2;2;2;2;2;1;1;1;1;1;1;1	5;5;5;5;3;3;3;3;2;2;2;2;2;1;1;1;1;1;1;1	Dehydrodolichyl diphosphate synthase	DHDDS	>sp|Q86SQ9-3|DHDDS_HUMAN Isoform 3 of Dehydrodolichyl diphosphate synthase OS=Homo sapiens GN=DHDDS;>tr|B7Z4B9|B7Z4B9_HUMAN Dehydrodolichyl diphosphate synthase OS=Homo sapiens GN=DHDDS PE=2 SV=1;>sp|Q86SQ9|DHDDS_HUMAN Dehydrodolichyl diphosphate synthase	20	5	5	5	3	3	4	3	3	3	3	3	3	3	4	3	3	3	4	3	3	3	3	3	3	3	4	3	3	3	4	3	3	3	3	3	3	3	4	3	17.7	17.7
B7Z4N5;B7Z755;P42568;B1APT5	B7Z4N5;B7Z755;P42568	5;5;5;1	5;5;5;1	5;5;5;1	Protein AF-9	MLLT3	>tr|B7Z4N5|B7Z4N5_HUMAN Protein AF-9 OS=Homo sapiens GN=MLLT3 PE=2 SV=1;>tr|B7Z755|B7Z755_HUMAN Protein AF-9 OS=Homo sapiens GN=MLLT3 PE=2 SV=1;>sp|P42568|AF9_HUMAN Protein AF-9 OS=Homo sapiens GN=MLLT3 PE=1 SV=2	4	5	5	5	4	4	5	4	5	4	4	4	3	3	2	3	4	4	5	4	5	4	4	4	3	3	2	3	4	4	5	4	5	4	4	4	3	3	2	3	10.9	10.9
B7Z500;Q9Y383-2;Q9Y383;B7Z4Q3;C9JWT3;B8ZZ09	B7Z500;Q9Y383-2;Q9Y383;B7Z4Q3	9;9;9;9;3;1	9;9;9;9;3;1	6;6;6;6;3;0	Putative RNA-binding protein Luc7-like 2;UPF0562 protein C7orf55	LUC7L2;C7orf55	>tr|B7Z500|B7Z500_HUMAN Putative RNA-binding protein Luc7-like 2 OS=Homo sapiens GN=LUC7L2 PE=2 SV=1;>sp|Q9Y383-2|LC7L2_HUMAN Isoform 2 of Putative RNA-binding protein Luc7-like 2 OS=Homo sapiens GN=LUC7L2;>sp|Q9Y383|LC7L2_HUMAN Putative RNA-binding protei	6	9	9	6	6	6	8	7	8	7	7	8	7	5	5	7	6	6	8	7	8	7	7	8	7	5	5	7	4	4	5	5	5	5	5	5	5	3	3	5	28	28
B7Z4V2;P38646;F5H3L8;D6RJI2;D6RA73;H0Y8S0;H0YBG6	B7Z4V2;P38646;F5H3L8	34;34;25;8;5;4;4	34;34;25;8;5;4;4	34;34;25;8;5;4;4	Stress-70 protein, mitochondrial	HSPA9	>tr|B7Z4V2|B7Z4V2_HUMAN Stress-70 protein, mitochondrial OS=Homo sapiens GN=HSPA9 PE=2 SV=1;>sp|P38646|GRP75_HUMAN Stress-70 protein, mitochondrial OS=Homo sapiens GN=HSPA9 PE=1 SV=2;>tr|F5H3L8|F5H3L8_HUMAN Stress-70 protein, mitochondrial OS=Homo sapiens	7	34	34	34	29	32	29	27	26	29	27	31	29	27	28	29	29	32	29	27	26	29	27	31	29	27	28	29	29	32	29	27	26	29	27	31	29	27	28	29	53.7	53.7
B7Z5J4;Q9UI42-2;Q9UI42;F5H0B9;C9J6N7	B7Z5J4;Q9UI42-2;Q9UI42;F5H0B9	3;3;3;2;1	3;3;3;2;1	3;3;3;2;1	Carboxypeptidase A4	CPA4	>tr|B7Z5J4|B7Z5J4_HUMAN Carboxypeptidase A4 OS=Homo sapiens GN=CPA4 PE=2 SV=1;>sp|Q9UI42-2|CBPA4_HUMAN Isoform 2 of Carboxypeptidase A4 OS=Homo sapiens GN=CPA4;>sp|Q9UI42|CBPA4_HUMAN Carboxypeptidase A4 OS=Homo sapiens GN=CPA4 PE=1 SV=2;>tr|F5H0B9|F5H0B9_H	5	3	3	3	2	1	0	2	1	0	1	2	0	1	3	1	2	1	0	2	1	0	1	2	0	1	3	1	2	1	0	2	1	0	1	2	0	1	3	1	9.8	9.8
E9PH57;B7Z5M6;P15884-3;H3BPJ7;H3BTP3;B7Z6Y1;P15884;G0LNU1;B3KUC0;H3BPQ1;G0LNU2;B3KT62;B4DUG3;G0LNU8;P15884-2;H3BT24;H3BTZ0;G0LNV1;G0LNV0;H3BP59;H3BTC3;H3BME8;H3BMC8;G0LNT4;H3BUQ3;H3BTM9;G0LNT7;H3BNZ2;H3BPG3;H3BVH6;H3BRF7;H3BNI2	E9PH57;B7Z5M6;P15884-3;H3BPJ7;H3BTP3;B7Z6Y1;P15884;G0LNU1;B3KUC0;H3BPQ1;G0LNU2;B3KT62;B4DUG3;G0LNU8;P15884-2	13;13;13;12;12;12;12;11;11;11;10;9;8;8;7;6;6;6;6;5;5;4;4;4;4;2;2;2;2;1;1;1	13;13;13;12;12;12;12;11;11;11;10;9;8;8;7;6;6;6;6;5;5;4;4;4;4;2;2;2;2;1;1;1	9;9;9;8;8;8;8;7;7;7;6;5;4;4;3;6;6;2;2;5;5;4;4;4;4;2;2;2;2;1;1;1	Transcription factor 4	TCF4	>tr|E9PH57|E9PH57_HUMAN Transcription factor 4 OS=Homo sapiens GN=TCF4 PE=4 SV=1;>tr|B7Z5M6|B7Z5M6_HUMAN Transcription factor 4 OS=Homo sapiens GN=TCF4 PE=2 SV=1;>sp|P15884-3|ITF2_HUMAN Isoform SEF2-1D of Transcription factor 4 OS=Homo sapiens GN=TCF4;>tr|	32	13	13	9	4	5	7	6	10	7	10	10	5	5	2	4	4	5	7	6	10	7	10	10	5	5	2	4	2	2	4	3	7	4	7	7	2	2	1	1	29.4	29.4
B7Z5Q0;Q5JS98;P40426-4;P40426-3;P40426-2;E9PB27;P40426	B7Z5Q0;Q5JS98;P40426-4;P40426-3;P40426-2;E9PB27;P40426	2;2;2;2;2;2;2	1;1;1;1;1;1;1	1;1;1;1;1;1;1	Pre-B-cell leukemia transcription factor 3	PBX3	>tr|B7Z5Q0|B7Z5Q0_HUMAN Pre-B-cell leukemia transcription factor 3 OS=Homo sapiens GN=PBX3 PE=2 SV=1;>tr|Q5JS98|Q5JS98_HUMAN Pre-B-cell leukemia homeobox 3 OS=Homo sapiens GN=PBX3 PE=2 SV=1;>sp|P40426-4|PBX3_HUMAN Isoform PBX3d of Pre-B-cell leukemia trans	7	2	1	1	0	0	1	1	2	2	1	2	0	0	0	0	0	0	0	1	1	1	1	1	0	0	0	0	0	0	0	1	1	1	1	1	0	0	0	0	8.4	4.2
Q5JXI8;B7Z6U8;B7Z5V0;F5GWR5;Q13642-1;Q13642-5;Q13642-4;Q5JXI0;Q5JXH9;Q5JXH8;Q5JXH7;Q5JXI3;Q5JXI2;Q13642-3;Q13642	Q5JXI8;B7Z6U8;B7Z5V0;F5GWR5;Q13642-1;Q13642-5;Q13642-4;Q5JXI0;Q5JXH9;Q5JXH8;Q5JXH7;Q5JXI3;Q5JXI2;Q13642-3;Q13642	2;2;2;2;2;2;2;1;1;1;1;1;1;1;1	2;2;2;2;2;2;2;1;1;1;1;1;1;1;1	2;2;2;2;2;2;2;1;1;1;1;1;1;1;1	Four and a half LIM domains protein 1	FHL1	>tr|Q5JXI8|Q5JXI8_HUMAN Four and a half LIM domains 1 (Fragment) OS=Homo sapiens GN=FHL1 PE=2 SV=1;>tr|B7Z6U8|B7Z6U8_HUMAN Four and a half LIM domains protein 1 OS=Homo sapiens GN=FHL1 PE=2 SV=1;>tr|B7Z5V0|B7Z5V0_HUMAN Four and a half LIM domains protein 1	15	2	2	2	2	1	2	1	2	1	2	2	0	0	0	0	2	1	2	1	2	1	2	2	0	0	0	0	2	1	2	1	2	1	2	2	0	0	0	0	7.8	7.8
B7Z5Y8;E9PKS6;F5H2Q8;O75382-2;O75382;F5GX85;O75382-3;E9PMK8	B7Z5Y8;E9PKS6;F5H2Q8;O75382-2;O75382;F5GX85;O75382-3	5;5;5;5;5;4;4;1	5;5;5;5;5;4;4;1	5;5;5;5;5;4;4;1	Tripartite motif-containing protein 3	TRIM3	>tr|B7Z5Y8|B7Z5Y8_HUMAN Tripartite motif-containing protein 3 OS=Homo sapiens GN=TRIM3 PE=2 SV=1;>tr|E9PKS6|E9PKS6_HUMAN Tripartite motif-containing protein 3 OS=Homo sapiens GN=TRIM3 PE=4 SV=1;>tr|F5H2Q8|F5H2Q8_HUMAN Tripartite motif-containing protein 3	8	5	5	5	1	2	5	3	2	4	3	3	3	4	4	4	1	2	5	3	2	4	3	3	3	4	4	4	1	2	5	3	2	4	3	3	3	4	4	4	7.6	7.6
E5RJD2;E5RJG7;E5RFV2;B7Z6B8;Q16698	E5RJD2;E5RJG7;E5RFV2;B7Z6B8;Q16698	1;1;1;1;1	1;1;1;1;1	1;1;1;1;1	2,4-dienoyl-CoA reductase, mitochondrial	DECR1	>tr|E5RJD2|E5RJD2_HUMAN 2,4-dienoyl-CoA reductase, mitochondrial (Fragment) OS=Homo sapiens GN=DECR1 PE=4 SV=1;>tr|E5RJG7|E5RJG7_HUMAN 2,4-dienoyl-CoA reductase, mitochondrial (Fragment) OS=Homo sapiens GN=DECR1 PE=4 SV=1;>tr|E5RFV2|E5RFV2_HUMAN 2,4-dienoy	5	1	1	1	1	1	0	1	0	1	0	1	0	0	0	0	1	1	0	1	0	1	0	1	0	0	0	0	1	1	0	1	0	1	0	1	0	0	0	0	14.6	14.6
E7EPB3;B7Z6S8;P50914	E7EPB3;B7Z6S8;P50914	5;5;5	5;5;5	5;5;5	60S ribosomal protein L14	RPL14	>tr|E7EPB3|E7EPB3_HUMAN 60S ribosomal protein L14 OS=Homo sapiens GN=RPL14 PE=4 SV=1;>tr|B7Z6S8|B7Z6S8_HUMAN 60S ribosomal protein L14 OS=Homo sapiens GN=RPL14 PE=2 SV=1;>sp|P50914|RL14_HUMAN 60S ribosomal protein L14 OS=Homo sapiens GN=RPL14 PE=1 SV=4	3	5	5	5	4	4	4	3	4	4	4	3	5	4	3	4	4	4	4	3	4	4	4	3	5	4	3	4	4	4	4	3	4	4	4	3	5	4	3	4	35.5	35.5
B7Z7A3;Q9BZE4;B4DY13;Q5T3R7	B7Z7A3;Q9BZE4;B4DY13	7;7;6;2	7;7;6;2	7;7;6;2	Nucleolar GTP-binding protein 1	GTPBP4	>tr|B7Z7A3|B7Z7A3_HUMAN Nucleolar GTP-binding protein 1 OS=Homo sapiens GN=GTPBP4 PE=2 SV=1;>sp|Q9BZE4|NOG1_HUMAN Nucleolar GTP-binding protein 1 OS=Homo sapiens GN=GTPBP4 PE=1 SV=3;>tr|B4DY13|B4DY13_HUMAN Nucleolar GTP-binding protein 1 OS=Homo sapiens GN	4	7	7	7	4	5	3	4	0	3	2	2	3	4	6	4	4	5	3	4	0	3	2	2	3	4	6	4	4	5	3	4	0	3	2	2	3	4	6	4	14.5	14.5
E9PPX6;B7Z7I6	E9PPX6;B7Z7I6	1;1	1;1	1;1	ATP synthase mitochondrial F1 complex assembly factor 1	ATPAF1	>tr|E9PPX6|E9PPX6_HUMAN ATP synthase mitochondrial F1 complex assembly factor 1 OS=Homo sapiens GN=ATPAF1 PE=4 SV=1;>tr|B7Z7I6|B7Z7I6_HUMAN ATP synthase mitochondrial F1 complex assembly factor 1 OS=Homo sapiens GN=ATPAF1 PE=2 SV=1	2	1	1	1	1	1	1	1	1	1	1	1	1	1	1	1	1	1	1	1	1	1	1	1	1	1	1	1	1	1	1	1	1	1	1	1	1	1	1	1	28.9	28.9
F5H8E5;B7Z815;Q93009;H3BND8;B7Z7T5;F5H2X1	F5H8E5;B7Z815;Q93009;H3BND8;B7Z7T5	7;7;7;5;4;2	7;7;7;5;4;2	7;7;7;5;4;2	Ubiquitin carboxyl-terminal hydrolase 7;Ubiquitin carboxyl-terminal hydrolase	USP7	>tr|F5H8E5|F5H8E5_HUMAN Ubiquitin carboxyl-terminal hydrolase OS=Homo sapiens GN=USP7 PE=3 SV=1;>tr|B7Z815|B7Z815_HUMAN Ubiquitin carboxyl-terminal hydrolase OS=Homo sapiens GN=USP7 PE=2 SV=1;>sp|Q93009|UBP7_HUMAN Ubiquitin carboxyl-terminal hydrolase 7 OS	6	7	7	7	1	1	0	1	5	3	5	6	2	2	1	1	1	1	0	1	5	3	5	6	2	2	1	1	1	1	0	1	5	3	5	6	2	2	1	1	7.7	7.7
B7Z817;Q15392;F5H0H1;H7C4B7;B7Z943	B7Z817;Q15392;F5H0H1	10;10;5;3;1	10;10;5;3;1	10;10;5;3;1	Delta(24)-sterol reductase	DHCR24	>tr|B7Z817|B7Z817_HUMAN Delta(24)-sterol reductase OS=Homo sapiens GN=DHCR24 PE=2 SV=1;>sp|Q15392|DHC24_HUMAN Delta(24)-sterol reductase OS=Homo sapiens GN=DHCR24 PE=1 SV=2;>tr|F5H0H1|F5H0H1_HUMAN Delta(24)-sterol reductase OS=Homo sapiens GN=DHCR24 PE=4 S	5	10	10	10	7	5	5	3	7	6	6	9	3	2	2	4	7	5	5	3	7	6	6	9	3	2	2	4	7	5	5	3	7	6	6	9	3	2	2	4	22.7	22.7
F8W1G3;F8VQW0;F8VX73;F8VPI1;F8W201;F8W086;F8VR05;B7Z984;F8VQQ5;F8VSI7;F8VVJ4;F8VPZ7;P55061;F8W034	F8W1G3;F8VQW0;F8VX73;F8VPI1;F8W201;F8W086;F8VR05;B7Z984;F8VQQ5;F8VSI7;F8VVJ4;F8VPZ7;P55061;F8W034	2;2;2;2;2;2;2;2;2;2;2;2;2;2	2;2;2;2;2;2;2;2;2;2;2;2;2;2	2;2;2;2;2;2;2;2;2;2;2;2;2;2	Bax inhibitor 1	TMBIM6	>tr|F8W1G3|F8W1G3_HUMAN Bax inhibitor 1 (Fragment) OS=Homo sapiens GN=TMBIM6 PE=4 SV=1;>tr|F8VQW0|F8VQW0_HUMAN Bax inhibitor 1 (Fragment) OS=Homo sapiens GN=TMBIM6 PE=4 SV=1;>tr|F8VX73|F8VX73_HUMAN Bax inhibitor 1 (Fragment) OS=Homo sapiens GN=TMBIM6 PE=4	14	2	2	2	2	0	2	1	0	1	0	1	1	0	2	1	2	0	2	1	0	1	0	1	1	0	2	1	2	0	2	1	0	1	0	1	1	0	2	1	56.2	56.2
B7Z9I1;Q5T4U5;P11310;P11310-2;B4DJE7;E9PJM9;H0YDT5;E9PRX4	B7Z9I1;Q5T4U5;P11310;P11310-2;B4DJE7	12;12;12;12;8;3;1;1	12;12;12;12;8;3;1;1	12;12;12;12;8;3;1;1	Medium-chain specific acyl-CoA dehydrogenase, mitochondrial	ACADM	>tr|B7Z9I1|B7Z9I1_HUMAN Medium-chain-specific acyl-CoA dehydrogenase, mitochondrial OS=Homo sapiens GN=ACADM PE=2 SV=1;>tr|Q5T4U5|Q5T4U5_HUMAN Acyl-Coenzyme A dehydrogenase, C-4 to C-12 straight chain OS=Homo sapiens GN=ACADM PE=2 SV=1;>sp|P11310|ACADM_HUM	8	12	12	12	11	11	9	8	10	11	10	12	9	10	10	8	11	11	9	8	10	11	10	12	9	10	10	8	11	11	9	8	10	11	10	12	9	10	10	8	31.4	31.4
B7ZCA0;Q96PV0-3;Q96PV0-2;Q96PV0-4;Q96PV0;B1AZX6	B7ZCA0;Q96PV0-3;Q96PV0-2;Q96PV0-4;Q96PV0;B1AZX6	2;2;2;2;2;1	2;2;2;2;2;1	2;2;2;2;2;1	Ras/Rap GTPase-activating protein SynGAP	SYNGAP1	>tr|B7ZCA0|B7ZCA0_HUMAN Ras GTPase-activating protein SynGAP OS=Homo sapiens GN=SYNGAP1 PE=4 SV=1;>sp|Q96PV0-3|SYGP1_HUMAN Isoform 3 of Ras GTPase-activating protein SynGAP OS=Homo sapiens GN=SYNGAP1;>sp|Q96PV0-2|SYGP1_HUMAN Isoform 2 of Ras GTPase-activat	6	2	2	2	1	0	1	0	1	0	0	1	0	0	0	0	1	0	1	0	1	0	0	1	0	0	0	0	1	0	1	0	1	0	0	1	0	0	0	0	2.4	2.4
O95487-2;O95487;B7ZKM8	O95487-2;O95487;B7ZKM8	14;14;14	14;14;14	14;14;14	Protein transport protein Sec24B	SEC24B	>sp|O95487-2|SC24B_HUMAN Isoform 2 of Protein transport protein Sec24B OS=Homo sapiens GN=SEC24B;>sp|O95487|SC24B_HUMAN Protein transport protein Sec24B OS=Homo sapiens GN=SEC24B PE=1 SV=2;>tr|B7ZKM8|B7ZKM8_HUMAN Protein transport protein Sec24B OS=Homo sa	3	14	14	14	5	6	14	7	12	7	9	10	5	5	1	7	5	6	14	7	12	7	9	10	5	5	1	7	5	6	14	7	12	7	9	10	5	5	1	7	14	14
B7ZKN0;Q92859;Q92859-3;Q92859-2;E7EUX3;Q59FP8	B7ZKN0;Q92859;Q92859-3;Q92859-2;E7EUX3;Q59FP8	12;12;11;11;10;9	12;12;11;11;10;9	12;12;11;11;10;9	Neogenin	NEO1	>tr|B7ZKN0|B7ZKN0_HUMAN NEO1 protein OS=Homo sapiens GN=NEO1 PE=2 SV=1;>sp|Q92859|NEO1_HUMAN Neogenin OS=Homo sapiens GN=NEO1 PE=1 SV=2;>sp|Q92859-3|NEO1_HUMAN Isoform 3 of Neogenin OS=Homo sapiens GN=NEO1;>sp|Q92859-2|NEO1_HUMAN Isoform 2 of Neogenin OS=H	6	12	12	12	7	8	7	5	5	8	6	7	5	6	5	6	7	8	7	5	5	8	6	7	5	6	5	6	7	8	7	5	5	8	6	7	5	6	5	6	11	11
E9PKA2;C9JY66;Q9BZ95-3;Q9BZ95-4;Q9BZ95-2;B7ZL11;Q9BZ95	E9PKA2;C9JY66;Q9BZ95-3;Q9BZ95-4;Q9BZ95-2;B7ZL11;Q9BZ95	1;1;1;1;1;1;1	1;1;1;1;1;1;1	1;1;1;1;1;1;1	Histone-lysine N-methyltransferase NSD3	WHSC1L1	>tr|E9PKA2|E9PKA2_HUMAN Histone-lysine N-methyltransferase NSD3 (Fragment) OS=Homo sapiens GN=WHSC1L1 PE=4 SV=1;>tr|C9JY66|C9JY66_HUMAN Histone-lysine N-methyltransferase NSD3 OS=Homo sapiens GN=WHSC1L1 PE=4 SV=1;>sp|Q9BZ95-3|NSD3_HUMAN Isoform 3 of Histon	7	1	1	1	1	1	0	0	0	1	1	1	0	1	1	0	1	1	0	0	0	1	1	1	0	1	1	0	1	1	0	0	0	1	1	1	0	1	1	0	4.3	4.3
B7ZLQ8;Q17RY0-2;Q17RY0;E5RJM0;E5RFP2;Q17RY0-3;H0YBG1;H0Y9D9;F8W963;F5H659;Q7Z5Q1-7;Q7Z5Q1-5;Q7Z5Q1-4;Q7Z5Q1-6;Q7Z5Q1-3;Q7Z5Q1;Q8NE35-2;Q8NE35;E7EPM3;F5H160	B7ZLQ8;Q17RY0-2;Q17RY0;E5RJM0;E5RFP2;Q17RY0-3	20;20;20;19;10;10;6;5;5;5;5;5;5;5;5;5;5;5;5;5	20;20;20;19;10;10;6;5;5;5;5;5;5;5;5;5;5;5;5;5	20;20;20;19;10;10;6;5;5;5;5;5;5;5;5;5;5;5;5;5	Cytoplasmic polyadenylation element-binding protein 4	CPEB4	>tr|B7ZLQ8|B7ZLQ8_HUMAN CPEB4 protein OS=Homo sapiens GN=CPEB4 PE=2 SV=1;>sp|Q17RY0-2|CPEB4_HUMAN Isoform 2 of Cytoplasmic polyadenylation element-binding protein 4 OS=Homo sapiens GN=CPEB4;>sp|Q17RY0|CPEB4_HUMAN Cytoplasmic polyadenylation element-binding	20	20	20	20	12	15	16	16	15	12	11	15	16	12	12	15	12	15	16	16	15	12	11	15	16	12	12	15	12	15	16	16	15	12	11	15	16	12	12	15	32.7	32.7
B8ZZ93;B8ZZH7;F8WCL7;Q9C086;H7C171;C9JKY0	B8ZZ93;B8ZZH7;F8WCL7;Q9C086;H7C171;C9JKY0	5;5;5;5;3;3	5;5;5;5;3;3	5;5;5;5;3;3	INO80 complex subunit B	INO80B;INO80B-WBP1	>tr|B8ZZ93|B8ZZ93_HUMAN INO80 complex subunit B OS=Homo sapiens GN=INO80B PE=4 SV=1;>tr|B8ZZH7|B8ZZH7_HUMAN INO80 complex subunit B (Fragment) OS=Homo sapiens GN=INO80B PE=4 SV=2;>tr|F8WCL7|F8WCL7_HUMAN INO80 complex subunit B OS=Homo sapiens GN=INO80B PE=	6	5	5	5	5	3	3	3	3	4	5	3	3	4	2	3	5	3	3	3	3	4	5	3	3	4	2	3	5	3	3	3	3	4	5	3	3	4	2	3	39.7	39.7
B8ZZD1;B9A018;Q53GS9;B4DHT4;G5E9H0;F8WC91	B8ZZD1;B9A018;Q53GS9;B4DHT4	5;5;5;4;2;1	5;5;5;4;2;1	5;5;5;4;2;1	U4/U6.U5 tri-snRNP-associated protein 2	USP39	>tr|B8ZZD1|B8ZZD1_HUMAN U4/U6.U5 tri-snRNP-associated protein 2 OS=Homo sapiens GN=USP39 PE=4 SV=1;>tr|B9A018|B9A018_HUMAN U4/U6.U5 tri-snRNP-associated protein 2 OS=Homo sapiens GN=USP39 PE=4 SV=1;>sp|Q53GS9|SNUT2_HUMAN U4/U6.U5 tri-snRNP-associated prote	6	5	5	5	4	1	4	1	2	3	1	4	2	3	4	3	4	1	4	1	2	3	1	4	2	3	4	3	4	1	4	1	2	3	1	4	2	3	4	3	14.3	14.3
H7BZK5;B8ZZK2;O75223	H7BZK5;B8ZZK2;O75223	1;1;1	1;1;1	1;1;1	Gamma-glutamylcyclotransferase	GGCT	>tr|H7BZK5|H7BZK5_HUMAN Gamma-glutamylcyclotransferase (Fragment) OS=Homo sapiens GN=GGCT PE=4 SV=1;>tr|B8ZZK2|B8ZZK2_HUMAN Gamma-glutamylcyclotransferase OS=Homo sapiens GN=GGCT PE=4 SV=1;>sp|O75223|GGCT_HUMAN Gamma-glutamylcyclotransferase OS=Homo sapien	3	1	1	1	0	1	0	0	0	0	0	0	0	0	1	0	0	1	0	0	0	0	0	0	0	0	1	0	0	1	0	0	0	0	0	0	0	0	1	0	10.9	10.9
H7C463;C9J406;B8ZZQ7;B9A067;F8W9I1;F5GZ32;Q16891-3;Q16891-2;Q16891	H7C463;C9J406;B8ZZQ7;B9A067;F8W9I1;F5GZ32;Q16891-3;Q16891-2;Q16891	1;1;1;1;1;1;1;1;1	1;1;1;1;1;1;1;1;1	1;1;1;1;1;1;1;1;1	MICOS complex subunit MIC60	IMMT	>tr|H7C463|H7C463_HUMAN Mitochondrial inner membrane protein (Fragment) OS=Homo sapiens GN=IMMT PE=4 SV=1;>tr|C9J406|C9J406_HUMAN Mitochondrial inner membrane protein OS=Homo sapiens GN=IMMT PE=4 SV=1;>tr|B8ZZQ7|B8ZZQ7_HUMAN Mitochondrial inner membrane pr	9	1	1	1	0	0	0	0	0	0	0	0	0	1	0	1	0	0	0	0	0	0	0	0	0	1	0	1	0	0	0	0	0	0	0	0	0	1	0	1	2.8	2.8
P0CG06;P0CG05;P0CG04;P0CF74;B9A064;A0M8Q6	P0CG06;P0CG05;P0CG04;P0CF74;B9A064;A0M8Q6	2;2;2;2;2;1	2;2;2;2;2;1	2;2;2;2;2;1	Ig lambda-3 chain C regions;Ig lambda-2 chain C regions;Ig lambda-1 chain C regions;Ig lambda-6 chain C region;Immunoglobulin lambda-like polypeptide 5;Ig lambda-7 chain C region	IGLC3;IGLC2;IGLC1;IGLC6;IGLL5;IGLC7	>sp|P0CG06|LAC3_HUMAN Ig lambda-3 chain C regions OS=Homo sapiens GN=IGLC3 PE=1 SV=1;>sp|P0CG05|LAC2_HUMAN Ig lambda-2 chain C regions OS=Homo sapiens GN=IGLC2 PE=1 SV=1;>sp|P0CG04|LAC1_HUMAN Ig lambda-1 chain C regions OS=Homo sapiens GN=IGLC1 PE=1 SV=1;>	6	2	2	2	0	0	0	2	0	0	0	0	0	0	1	0	0	0	0	2	0	0	0	0	0	0	1	0	0	0	0	2	0	0	0	0	0	0	1	0	28.3	28.3
B9A069;Q9P0S3;Q53FV1;F8VXD5;Q8N138-4;Q8N138	B9A069;Q9P0S3;Q53FV1;F8VXD5;Q8N138-4;Q8N138	2;2;2;1;1;1	2;2;2;1;1;1	2;2;2;1;1;1	ORM1-like protein 1;ORM1-like protein 2;ORM1-like protein 3	ORMDL1;ORMDL2;ORMDL3	>tr|B9A069|B9A069_HUMAN ORM1-like protein 1 OS=Homo sapiens GN=ORMDL1 PE=4 SV=1;>sp|Q9P0S3|ORML1_HUMAN ORM1-like protein 1 OS=Homo sapiens GN=ORMDL1 PE=2 SV=1;>sp|Q53FV1|ORML2_HUMAN ORM1-like protein 2 OS=Homo sapiens GN=ORMDL2 PE=2 SV=2;>tr|F8VXD5|F8VXD5_	6	2	2	2	1	0	1	0	2	0	2	2	1	0	0	0	1	0	1	0	2	0	2	2	1	0	0	0	1	0	1	0	2	0	2	2	1	0	0	0	23.9	23.9
B9EGA3;Q92925-3;Q92925;Q92925-2;F8W9D0;Q6STE5-2;Q6STE5	B9EGA3;Q92925-3;Q92925;Q92925-2	10;10;10;9;1;1;1	10;10;10;9;1;1;1	10;10;10;9;1;1;1	SWI/SNF-related matrix-associated actin-dependent regulator of chromatin subfamily D member 2	SMARCD2	>tr|B9EGA3|B9EGA3_HUMAN SMARCD2 protein OS=Homo sapiens GN=SMARCD2 PE=2 SV=1;>sp|Q92925-3|SMRD2_HUMAN Isoform 3 of SWI/SNF-related matrix-associated actin-dependent regulator of chromatin subfamily D member 2 OS=Homo sapiens GN=SMARCD2;>sp|Q92925|SMRD2_HUM	7	10	10	10	5	5	5	4	5	6	6	7	6	6	6	6	5	5	5	4	5	6	6	7	6	6	6	6	5	5	5	4	5	6	6	7	6	6	6	6	29.4	29.4
B9ZVP8;Q15772-1;Q15772	B9ZVP8;Q15772-1;Q15772	1;1;1	1;1;1	1;1;1	Striated muscle preferentially expressed protein kinase	SPEG	>tr|B9ZVP8|B9ZVP8_HUMAN Striated muscle preferentially-expressed protein kinase OS=Homo sapiens GN=SPEG PE=4 SV=1;>sp|Q15772-1|SPEG_HUMAN Isoform 1 of Striated muscle preferentially expressed protein kinase OS=Homo sapiens GN=SPEG;>sp|Q15772|SPEG_HUMAN Str	3	1	1	1	1	0	1	0	0	0	0	0	1	1	1	1	1	0	1	0	0	0	0	0	1	1	1	1	1	0	1	0	0	0	0	0	1	1	1	1	0.3	0.3
E7ERW8;B9ZVX0;E9PHQ0;E7ET75;E9PEZ3;H9KV28;O60610-2;E9PEZ2;O60610;E7EMV0;F5H2N3;E5RJ79;B4E2I7	E7ERW8;B9ZVX0;E9PHQ0;E7ET75;E9PEZ3;H9KV28;O60610-2;E9PEZ2;O60610;E7EMV0	12;12;12;12;12;12;12;12;12;7;2;1;1	12;12;12;12;12;12;12;12;12;7;2;1;1	12;12;12;12;12;12;12;12;12;7;2;1;1	Protein diaphanous homolog 1	DIAPH1	>tr|E7ERW8|E7ERW8_HUMAN Protein diaphanous homolog 1 OS=Homo sapiens GN=DIAPH1 PE=4 SV=1;>tr|B9ZVX0|B9ZVX0_HUMAN Diaphanous homolog 1 (Drosophila), isoform CRA_a OS=Homo sapiens GN=DIAPH1 PE=4 SV=1;>tr|E9PHQ0|E9PHQ0_HUMAN Protein diaphanous homolog 1 OS=Ho	13	12	12	12	1	2	9	4	6	5	5	8	1	4	2	2	1	2	9	4	6	5	5	8	1	4	2	2	1	2	9	4	6	5	5	8	1	4	2	2	12.9	12.9
C6GKU9;Q96HR3	C6GKU9;Q96HR3	1;1	1;1	1;1	Mediator of RNA polymerase II transcription subunit 30	MED30	>tr|C6GKU9|C6GKU9_HUMAN Mediator of RNA polymerase II transcription subunit 30 OS=Homo sapiens GN=MED30S PE=2 SV=1;>sp|Q96HR3|MED30_HUMAN Mediator of RNA polymerase II transcription subunit 30 OS=Homo sapiens GN=MED30 PE=1 SV=1	2	1	1	1	1	1	1	1	1	1	1	1	1	1	1	0	1	1	1	1	1	1	1	1	1	1	1	0	1	1	1	1	1	1	1	1	1	1	1	0	8.4	8.4
C9IYM8;Q6T4R5-3;Q6T4R5-2;Q6T4R5	C9IYM8;Q6T4R5-3;Q6T4R5-2;Q6T4R5	1;1;1;1	1;1;1;1	1;1;1;1	Nance-Horan syndrome protein	NHS	>tr|C9IYM8|C9IYM8_HUMAN Nance-Horan syndrome protein OS=Homo sapiens GN=NHS PE=4 SV=1;>sp|Q6T4R5-3|NHS_HUMAN Isoform 3 of Nance-Horan syndrome protein OS=Homo sapiens GN=NHS;>sp|Q6T4R5-2|NHS_HUMAN Isoform 2 of Nance-Horan syndrome protein OS=Homo sapiens G	4	1	1	1	0	0	1	1	0	1	1	1	0	1	0	1	0	0	1	1	0	1	1	1	0	1	0	1	0	0	1	1	0	1	1	1	0	1	0	1	0.7	0.7
C9IZ04;Q9NY27-3;Q9NY27;F8WDK3;H7C559;Q9NY27-2	C9IZ04;Q9NY27-3;Q9NY27;F8WDK3;H7C559;Q9NY27-2	2;2;2;1;1;1	2;2;2;1;1;1	2;2;2;1;1;1	Serine/threonine-protein phosphatase 4 regulatory subunit 2	PPP4R2	>tr|C9IZ04|C9IZ04_HUMAN Serine/threonine-protein phosphatase 4 regulatory subunit 2 (Fragment) OS=Homo sapiens GN=PPP4R2 PE=4 SV=1;>sp|Q9NY27-3|PP4R2_HUMAN Isoform 3 of Serine/threonine-protein phosphatase 4 regulatory subunit 2 OS=Homo sapiens GN=PPP4R2;>	6	2	2	2	1	1	1	1	0	0	0	1	0	1	1	0	1	1	1	1	0	0	0	1	0	1	1	0	1	1	1	1	0	0	0	1	0	1	1	0	15.9	15.9
H7C531;C9IZE4;E9PHI9;Q6UV22;Q15008	H7C531;C9IZE4;E9PHI9;Q6UV22;Q15008	1;1;1;1;1	1;1;1;1;1	1;1;1;1;1	26S proteasome non-ATPase regulatory subunit 6	PSMD6	>tr|H7C531|H7C531_HUMAN 26S proteasome non-ATPase regulatory subunit 6 (Fragment) OS=Homo sapiens GN=PSMD6 PE=4 SV=1;>tr|C9IZE4|C9IZE4_HUMAN 26S proteasome non-ATPase regulatory subunit 6 OS=Homo sapiens GN=PSMD6 PE=4 SV=1;>tr|E9PHI9|E9PHI9_HUMAN 26S prote	5	1	1	1	1	0	0	1	0	0	0	0	0	1	1	1	1	0	0	1	0	0	0	0	0	1	1	1	1	0	0	1	0	0	0	0	0	1	1	1	10.9	10.9
F8WAS3;C9IZN5;H7BYD0;Q5H9R2;Q16718	F8WAS3;C9IZN5;H7BYD0;Q5H9R2;Q16718	2;2;2;2;2	2;2;2;2;2	2;2;2;2;2	NADH dehydrogenase [ubiquinone] 1 alpha subcomplex subunit 5	NDUFA5	>tr|F8WAS3|F8WAS3_HUMAN NADH dehydrogenase [ubiquinone] 1 alpha subcomplex subunit 5 OS=Homo sapiens GN=NDUFA5 PE=4 SV=1;>tr|C9IZN5|C9IZN5_HUMAN NADH dehydrogenase [ubiquinone] 1 alpha subcomplex subunit 5 (Fragment) OS=Homo sapiens GN=NDUFA5 PE=4 SV=1;>tr	5	2	2	2	2	0	0	0	0	0	0	0	0	1	0	0	2	0	0	0	0	0	0	0	0	1	0	0	2	0	0	0	0	0	0	0	0	1	0	0	27.1	27.1
C9J3L8;C9J5W0;E9PAL7;C9IZQ1;P43307;F5H5Y2;P43307-2	C9J3L8;C9J5W0;E9PAL7;C9IZQ1;P43307;F5H5Y2;P43307-2	3;3;3;3;3;2;2	3;3;3;3;3;2;2	3;3;3;3;3;2;2	Translocon-associated protein subunit alpha	SSR1	>tr|C9J3L8|C9J3L8_HUMAN Translocon-associated protein subunit alpha OS=Homo sapiens GN=SSR1 PE=4 SV=1;>tr|C9J5W0|C9J5W0_HUMAN Translocon-associated protein subunit alpha OS=Homo sapiens GN=SSR1 PE=4 SV=1;>tr|E9PAL7|E9PAL7_HUMAN Translocon-associated protei	7	3	3	3	2	3	2	2	2	2	3	2	2	2	3	2	2	3	2	2	2	2	3	2	2	2	3	2	2	3	2	2	2	2	3	2	2	2	3	2	12.8	12.8
C9IZQ6;H7BXZ5;O60229-2;O60229;O60229-3	C9IZQ6;H7BXZ5;O60229-2;O60229;O60229-3	10;10;10;10;6	1;1;1;1;1	1;1;1;1;1	Kalirin	KALRN	>tr|C9IZQ6|C9IZQ6_HUMAN HCG2022551, isoform CRA_j OS=Homo sapiens GN=KALRN PE=4 SV=1;>tr|H7BXZ5|H7BXZ5_HUMAN Kalirin (Fragment) OS=Homo sapiens GN=KALRN PE=4 SV=1;>sp|O60229-2|KALRN_HUMAN Isoform 2 of Kalirin OS=Homo sapiens GN=KALRN;>sp|O60229|KALRN_HUMAN	5	10	1	1	7	6	6	7	7	5	6	7	6	5	6	9	1	0	0	0	1	0	1	1	0	0	0	1	1	0	0	0	1	0	1	1	0	0	0	1	5.8	0.7
C9J038;Q9GZV5;C9JR84;C9J337;C9JQS8	C9J038;Q9GZV5;C9JR84;C9J337	4;4;2;2;1	4;4;2;2;1	4;4;2;2;1	WW domain-containing transcription regulator protein 1	WWTR1	>tr|C9J038|C9J038_HUMAN WW domain-containing transcription regulator protein 1 (Fragment) OS=Homo sapiens GN=WWTR1 PE=4 SV=1;>sp|Q9GZV5|WWTR1_HUMAN WW domain-containing transcription regulator protein 1 OS=Homo sapiens GN=WWTR1 PE=1 SV=1;>tr|C9JR84|C9JR84_	5	4	4	4	1	2	4	1	1	2	2	2	1	1	2	2	1	2	4	1	1	2	2	2	1	1	2	2	1	2	4	1	1	2	2	2	1	1	2	2	40.2	40.2
C9J2Y9;P30876;C9J4M6	C9J2Y9;P30876;C9J4M6	5;5;4	5;5;4	5;5;4	DNA-directed RNA polymerase;DNA-directed RNA polymerase II subunit RPB2	POLR2B	>tr|C9J2Y9|C9J2Y9_HUMAN DNA-directed RNA polymerase OS=Homo sapiens GN=POLR2B PE=3 SV=2;>sp|P30876|RPB2_HUMAN DNA-directed RNA polymerase II subunit RPB2 OS=Homo sapiens GN=POLR2B PE=1 SV=1;>tr|C9J4M6|C9J4M6_HUMAN DNA-directed RNA polymerase OS=Homo sapien	3	5	5	5	2	0	2	1	1	1	1	1	2	1	2	0	2	0	2	1	1	1	1	1	2	1	2	0	2	0	2	1	1	1	1	1	2	1	2	0	5.8	5.8
C9J384;E9PHS3;Q9BQ75	C9J384;E9PHS3;Q9BQ75	3;3;3	3;3;3	3;3;3	Protein CMSS1	CMSS1	>tr|C9J384|C9J384_HUMAN Uncharacterized protein C3orf26 (Fragment) OS=Homo sapiens GN=C3orf26 PE=4 SV=1;>tr|E9PHS3|E9PHS3_HUMAN Uncharacterized protein C3orf26 OS=Homo sapiens GN=C3orf26 PE=4 SV=1;>sp|Q9BQ75|CC026_HUMAN Uncharacterized protein C3orf26 OS=H	3	3	3	3	3	3	3	3	2	1	1	2	3	2	3	3	3	3	3	3	2	1	1	2	3	2	3	3	3	3	3	3	2	1	1	2	3	2	3	3	11.1	11.1
C9JW41;Q9NQ55-2;Q9NQ55;C9J3F9;C9JHF7;C9J3W3;A8MV53	C9JW41;Q9NQ55-2;Q9NQ55;C9J3F9;C9JHF7;C9J3W3;A8MV53	2;2;2;2;1;1;1	2;2;2;2;1;1;1	2;2;2;2;1;1;1	Suppressor of SWI4 1 homolog	PPAN	>tr|C9JW41|C9JW41_HUMAN Suppressor of SWI4 1 homolog OS=Homo sapiens GN=PPAN PE=4 SV=1;>sp|Q9NQ55-2|SSF1_HUMAN Isoform 2 of Suppressor of SWI4 1 homolog OS=Homo sapiens GN=PPAN;>sp|Q9NQ55|SSF1_HUMAN Suppressor of SWI4 1 homolog OS=Homo sapiens GN=PPAN PE=1	7	2	2	2	0	0	0	0	0	0	0	1	1	0	0	0	0	0	0	0	0	0	0	1	1	0	0	0	0	0	0	0	0	0	0	1	1	0	0	0	6.1	6.1
C9J4Z3;P61513;E9PEL3;G5E9R3;A6NKH3	C9J4Z3;P61513;E9PEL3	3;3;2;1;1	3;3;2;1;1	3;3;2;1;1	60S ribosomal protein L37a	RPL37A	>tr|C9J4Z3|C9J4Z3_HUMAN 60S ribosomal protein L37a OS=Homo sapiens GN=RPL37A PE=4 SV=1;>sp|P61513|RL37A_HUMAN 60S ribosomal protein L37a OS=Homo sapiens GN=RPL37A PE=1 SV=2;>tr|E9PEL3|E9PEL3_HUMAN 60S ribosomal protein L37a OS=Homo sapiens GN=RPL37A PE=4 S	5	3	3	3	3	2	3	3	3	3	2	3	3	2	2	2	3	2	3	3	3	3	2	3	3	2	2	2	3	2	3	3	3	3	2	3	3	2	2	2	55.9	55.9
C9J6M1;Q99728	C9J6M1;Q99728	1;1	1;1	1;1	BRCA1-associated RING domain protein 1	BARD1	>tr|C9J6M1|C9J6M1_HUMAN BRCA1-associated RING domain protein 1 OS=Homo sapiens GN=BARD1 PE=4 SV=1;>sp|Q99728|BARD1_HUMAN BRCA1-associated RING domain protein 1 OS=Homo sapiens GN=BARD1 PE=1 SV=2	2	1	1	1	1	1	1	0	0	1	1	1	1	0	0	1	1	1	1	0	0	1	1	1	1	0	0	1	1	1	1	0	0	1	1	1	1	0	0	1	8.1	8.1
F5H1W0;C9J6P4;Q7Z2W4-3;Q7Z2W4-2;Q7Z2W4	F5H1W0;C9J6P4;Q7Z2W4-3;Q7Z2W4-2;Q7Z2W4	1;1;1;1;1	1;1;1;1;1	1;1;1;1;1	Zinc finger CCCH-type antiviral protein 1	ZC3HAV1	>tr|F5H1W0|F5H1W0_HUMAN Zinc finger CCCH-type antiviral protein 1 OS=Homo sapiens GN=ZC3HAV1 PE=4 SV=1;>tr|C9J6P4|C9J6P4_HUMAN Zinc finger CCCH-type antiviral protein 1 OS=Homo sapiens GN=ZC3HAV1 PE=4 SV=1;>sp|Q7Z2W4-3|ZCCHV_HUMAN Isoform 3 of Zinc finger	5	1	1	1	0	1	1	1	0	1	1	0	0	0	0	0	0	1	1	1	0	1	1	0	0	0	0	0	0	1	1	1	0	1	1	0	0	0	0	0	3	3
H0YB35;F8W6L0;E7ERK1;F5GXT2;O43374-2;O43374;C9J798;H7C4T0;F8WAS4;H0Y8C8;H0Y980	H0YB35;F8W6L0;E7ERK1;F5GXT2;O43374-2;O43374;C9J798;H7C4T0;F8WAS4;H0Y8C8;H0Y980	2;2;2;2;2;2;2;1;1;1;1	2;2;2;2;2;2;2;1;1;1;1	2;2;2;2;2;2;2;1;1;1;1	Ras GTPase-activating protein 4;Putative Ras GTPase-activating protein 4B	RASA4;RASA4B	>tr|H0YB35|H0YB35_HUMAN Ras GTPase-activating protein 4 (Fragment) OS=Homo sapiens GN=RASA4 PE=4 SV=1;>tr|F8W6L0|F8W6L0_HUMAN Putative Ras GTPase-activating protein 4B OS=Homo sapiens GN=RASA4B PE=4 SV=1;>tr|E7ERK1|E7ERK1_HUMAN Ras GTPase-activating protei	11	2	2	2	0	0	0	0	0	1	1	0	0	0	0	0	0	0	0	0	0	1	1	0	0	0	0	0	0	0	0	0	0	1	1	0	0	0	0	0	7.3	7.3
C9J7P5;Q969Z0-2;Q969Z0;C9J5A2;C9J347;C9IZN7	C9J7P5;Q969Z0-2;Q969Z0;C9J5A2;C9J347;C9IZN7	2;2;2;1;1;1	2;2;2;1;1;1	2;2;2;1;1;1	Protein TBRG4	TBRG4	>tr|C9J7P5|C9J7P5_HUMAN Protein TBRG4 (Fragment) OS=Homo sapiens GN=TBRG4 PE=4 SV=1;>sp|Q969Z0-2|TBRG4_HUMAN Isoform 2 of Protein TBRG4 OS=Homo sapiens GN=TBRG4;>sp|Q969Z0|TBRG4_HUMAN Protein TBRG4 OS=Homo sapiens GN=TBRG4 PE=1 SV=1;>tr|C9J5A2|C9J5A2_HUMAN	6	2	2	2	0	1	1	1	0	0	2	2	0	0	1	2	0	1	1	1	0	0	2	2	0	0	1	2	0	1	1	1	0	0	2	2	0	0	1	2	8.9	8.9
C9JJT5;F5H4H2;C9JU26;G3V325;C9J8H9;F8W7V3;P56134-2;P56134	C9JJT5;F5H4H2;C9JU26;G3V325;C9J8H9;F8W7V3;P56134-2;P56134	2;2;2;2;2;2;2;2	2;2;2;2;2;2;2;2	2;2;2;2;2;2;2;2	ATP synthase subunit f, mitochondrial	ATP5J2-PTCD1;ATP5J2	>tr|C9JJT5|C9JJT5_HUMAN Pentatricopeptide repeat-containing protein 1 OS=Homo sapiens GN=PTCD1 PE=4 SV=2;>tr|F5H4H2|F5H4H2_HUMAN ATP synthase subunit f, mitochondrial OS=Homo sapiens GN=ATP5J2 PE=4 SV=1;>tr|C9JU26|C9JU26_HUMAN ATP synthase subunit f, mitoc	8	2	2	2	1	1	1	1	0	0	2	0	1	1	1	1	1	1	1	1	0	0	2	0	1	1	1	1	1	1	1	1	0	0	2	0	1	1	1	1	44.4	44.4
C9J8R9;P12757-4;P12757-2;P12757-3;P12757-5;P12757	C9J8R9;P12757-4;P12757-2;P12757-3;P12757-5;P12757	1;1;1;1;1;1	1;1;1;1;1;1	1;1;1;1;1;1	Ski-like protein	SKIL	>tr|C9J8R9|C9J8R9_HUMAN Ski-like protein (Fragment) OS=Homo sapiens GN=SKIL PE=4 SV=1;>sp|P12757-4|SKIL_HUMAN Isoform SNOI of Ski-like protein OS=Homo sapiens GN=SKIL;>sp|P12757-2|SKIL_HUMAN Isoform SNOA of Ski-like protein OS=Homo sapiens GN=SKIL;>sp|P127	6	1	1	1	1	0	1	0	0	1	1	0	0	1	1	0	1	0	1	0	0	1	1	0	0	1	1	0	1	0	1	0	0	1	1	0	0	1	1	0	13	13
C9J9K3;P08865;A6NE09;C9JQR9	C9J9K3;P08865;A6NE09	11;11;9;4	11;11;9;4	11;11;9;4	40S ribosomal protein SA	RPSA;RPSAP58	>tr|C9J9K3|C9J9K3_HUMAN 40S ribosomal protein SA (Fragment) OS=Homo sapiens GN=RPSA PE=3 SV=1;>sp|P08865|RSSA_HUMAN 40S ribosomal protein SA OS=Homo sapiens GN=RPSA PE=1 SV=4;>tr|A6NE09|A6NE09_HUMAN Protein RPSAP58 OS=Homo sapiens GN=RPSAP58 PE=3 SV=1	4	11	11	11	6	9	10	9	10	7	9	10	5	6	8	7	6	9	10	9	10	7	9	10	5	6	8	7	6	9	10	9	10	7	9	10	5	6	8	7	46.2	46.2
C9JAB2;Q16629-3;Q16629-2;G5E9M3;Q16629	C9JAB2;Q16629-3;Q16629-2;G5E9M3;Q16629	6;6;6;6;6	5;5;5;5;5	5;5;5;5;5	Serine/arginine-rich splicing factor 7	SRSF7	>tr|C9JAB2|C9JAB2_HUMAN Serine/arginine-rich-splicing factor 7 OS=Homo sapiens GN=SRSF7 PE=4 SV=1;>sp|Q16629-3|SRSF7_HUMAN Isoform 3 of Serine/arginine-rich splicing factor 7 OS=Homo sapiens GN=SRSF7;>sp|Q16629-2|SRSF7_HUMAN Isoform 2 of Serine/arginine-ri	5	6	5	5	6	5	4	4	6	4	5	5	5	5	4	4	5	4	3	3	5	3	4	4	5	4	3	3	5	4	3	3	5	3	4	4	5	4	3	3	24.7	24.7
C9JAW5;C9JNU6;Q9Y241;Q9Y241-2	C9JAW5;C9JNU6;Q9Y241;Q9Y241-2	2;2;2;1	2;2;2;1	2;2;2;1	HIG1 domain family member 1A, mitochondrial	HIGD1A	>tr|C9JAW5|C9JAW5_HUMAN HIG1 domain family member 1A OS=Homo sapiens GN=HIGD1A PE=4 SV=1;>tr|C9JNU6|C9JNU6_HUMAN HIG1 domain family member 1A OS=Homo sapiens GN=HIGD1A PE=4 SV=1;>sp|Q9Y241|HIG1A_HUMAN HIG1 domain family member 1A OS=Homo sapiens GN=HIGD1A	4	2	2	2	1	2	1	1	2	1	0	1	1	2	2	2	1	2	1	1	2	1	0	1	1	2	2	2	1	2	1	1	2	1	0	1	1	2	2	2	48.2	48.2
H0YLP6;H0YMF4;H0YKD8;C9JB50;G5E9L2;P46779;P46779-2;E9PB24	H0YLP6;H0YMF4;H0YKD8;C9JB50;G5E9L2;P46779;P46779-2;E9PB24	4;4;4;4;4;4;4;4	4;4;4;4;4;4;4;4	4;4;4;4;4;4;4;4	60S ribosomal protein L28	RPL28	>tr|H0YLP6|H0YLP6_HUMAN 60S ribosomal protein L28 OS=Homo sapiens GN=RPL28 PE=4 SV=1;>tr|H0YMF4|H0YMF4_HUMAN 60S ribosomal protein L28 OS=Homo sapiens GN=RPL28 PE=4 SV=1;>tr|H0YKD8|H0YKD8_HUMAN 60S ribosomal protein L28 OS=Homo sapiens GN=RPL28 PE=4 SV=1;>	8	4	4	4	3	3	3	3	3	3	3	3	4	3	3	3	3	3	3	3	3	3	3	3	4	3	3	3	3	3	3	3	3	3	3	3	4	3	3	3	33.7	33.7
C9JB90;F5GXN4;C9JU14;F5GZB1;H7BYW1;H0YGL6;F5H668;Q9NRW1;P20340-2;P20340;Q14964	C9JB90;F5GXN4;C9JU14;F5GZB1;H7BYW1;H0YGL6;F5H668;Q9NRW1;P20340-2;P20340;Q14964	1;1;1;1;1;1;1;1;1;1;1	1;1;1;1;1;1;1;1;1;1;1	1;1;1;1;1;1;1;1;1;1;1	Ras-related protein Rab-6A;Ras-related protein Rab-6B;Ras-related protein Rab-39A	RAB6B;RAB6A;RAB39A	>tr|C9JB90|C9JB90_HUMAN Ras-related protein Rab-6B (Fragment) OS=Homo sapiens GN=RAB6B PE=4 SV=1;>tr|F5GXN4|F5GXN4_HUMAN Ras-related protein Rab-6A (Fragment) OS=Homo sapiens GN=RAB6A PE=4 SV=1;>tr|C9JU14|C9JU14_HUMAN Ras-related protein Rab-6B (Fragment)	11	1	1	1	1	1	1	1	1	1	1	1	1	1	1	1	1	1	1	1	1	1	1	1	1	1	1	1	1	1	1	1	1	1	1	1	1	1	1	1	22.4	22.4
C9JBL1;Q9Y6A9	C9JBL1;Q9Y6A9	1;1	1;1	1;1	Signal peptidase complex subunit 1	SPCS1	>tr|C9JBL1|C9JBL1_HUMAN Signal peptidase complex subunit 1 OS=Homo sapiens GN=SPCS1 PE=4 SV=1;>sp|Q9Y6A9|SPCS1_HUMAN Signal peptidase complex subunit 1 OS=Homo sapiens GN=SPCS1 PE=1 SV=3	2	1	1	1	0	1	1	0	1	1	1	0	0	1	0	1	0	1	1	0	1	1	1	0	0	1	0	1	0	1	1	0	1	1	1	0	0	1	0	1	21.2	21.2
C9JLU1;P52434;C9JCU7;C9JBJ6;C9J413	C9JLU1;P52434;C9JCU7;C9JBJ6;C9J413	2;2;2;1;1	2;2;2;1;1	2;2;2;1;1	DNA-directed RNA polymerases I, II, and III subunit RPABC3	POLR2H	>tr|C9JLU1|C9JLU1_HUMAN DNA-directed RNA polymerases I, II, and III subunit RPABC3 (Fragment) OS=Homo sapiens GN=POLR2H PE=4 SV=1;>sp|P52434|RPAB3_HUMAN DNA-directed RNA polymerases I, II, and III subunit RPABC3 OS=Homo sapiens GN=POLR2H PE=1 SV=4;>tr|C9JC	5	2	2	2	1	1	2	2	0	2	2	2	2	2	1	1	1	1	2	2	0	2	2	2	2	2	1	1	1	1	2	2	0	2	2	2	2	2	1	1	16.8	16.8
C9JD14;C9JZN1;C9JIS1;C9JXA5;Q9HAV0;P62879	C9JD14;C9JZN1;C9JIS1;C9JXA5;Q9HAV0;P62879	1;1;1;1;1;1	1;1;1;1;1;1	1;1;1;1;1;1	Guanine nucleotide-binding protein subunit beta-4;Guanine nucleotide-binding protein G(I)/G(S)/G(T) subunit beta-2	GNB4;GNB2	>tr|C9JD14|C9JD14_HUMAN Guanine nucleotide-binding protein subunit beta-4 (Fragment) OS=Homo sapiens GN=GNB4 PE=4 SV=1;>tr|C9JZN1|C9JZN1_HUMAN Guanine nucleotide-binding protein G(I)/G(S)/G(T) subunit beta-2 (Fragment) OS=Homo sapiens GN=GNB2 PE=4 SV=1;>tr	6	1	1	1	0	0	0	1	0	0	0	0	0	0	0	1	0	0	0	1	0	0	0	0	0	0	0	1	0	0	0	1	0	0	0	0	0	0	0	1	17.7	17.7
C9JD84;E7EV71;Q14766-3;Q14766-2;Q14766-5;Q14766;Q14766-4;H7C2H7	C9JD84;E7EV71;Q14766-3;Q14766-2;Q14766-5;Q14766;Q14766-4;H7C2H7	4;4;4;4;4;4;4;2	4;4;4;4;4;4;4;2	4;4;4;4;4;4;4;2	Latent-transforming growth factor beta-binding protein 1	LTBP1	>tr|C9JD84|C9JD84_HUMAN Latent-transforming growth factor beta-binding protein 1 OS=Homo sapiens GN=LTBP1 PE=4 SV=1;>tr|E7EV71|E7EV71_HUMAN Latent-transforming growth factor beta-binding protein 1 OS=Homo sapiens GN=LTBP1 PE=4 SV=2;>sp|Q14766-3|LTBP1_HUMAN	8	4	4	4	1	3	2	2	0	1	0	2	1	1	3	2	1	3	2	2	0	1	0	2	1	1	3	2	1	3	2	2	0	1	0	2	1	1	3	2	3.2	3.2
C9JDG0;Q9NSV4;A8MYX0;C9JDG1;Q9NSV4-6;Q9NSV4-4;C9JL55;Q9NSV4-5;F8W838;Q9NSV4-7;A6NG52;Q9NSV4-1;Q9NSV4-2	C9JDG0;Q9NSV4;A8MYX0;C9JDG1;Q9NSV4-6;Q9NSV4-4;C9JL55;Q9NSV4-5;F8W838;Q9NSV4-7;A6NG52;Q9NSV4-1	30;30;29;29;29;29;28;28;27;27;18;18;14	30;30;29;29;29;29;28;28;27;27;18;18;14	30;30;29;29;29;29;28;28;27;27;18;18;14	Protein diaphanous homolog 3	DIAPH3	>tr|C9JDG0|C9JDG0_HUMAN Protein diaphanous homolog 3 OS=Homo sapiens GN=DIAPH3 PE=4 SV=1;>sp|Q9NSV4|DIAP3_HUMAN Protein diaphanous homolog 3 OS=Homo sapiens GN=DIAPH3 PE=1 SV=4;>tr|A8MYX0|A8MYX0_HUMAN Protein diaphanous homolog 3 OS=Homo sapiens GN=DIAPH3	13	30	30	30	16	18	26	20	25	18	18	20	10	7	2	12	16	18	26	20	25	18	18	20	10	7	2	12	16	18	26	20	25	18	18	20	10	7	2	12	29.7	29.7
C9JFK9	C9JFK9	17	1	1		BAG3	>tr|C9JFK9|C9JFK9_HUMAN BAG family molecular chaperone regulator 3 (Fragment) OS=Homo sapiens GN=BAG3 PE=4 SV=1	1	17	1	1	14	15	17	16	15	16	16	17	14	14	14	14	0	1	1	1	1	1	1	1	1	1	1	1	0	1	1	1	1	1	1	1	1	1	1	1	77.5	4.3
C9JH72;P40937-2;P40937;F5H304;E9PEP3;F5H5S0;F5H0U6;F8W9B4	C9JH72;P40937-2;P40937;F5H304;E9PEP3;F5H5S0;F5H0U6;F8W9B4	2;2;2;1;1;1;1;1	2;2;2;1;1;1;1;1	2;2;2;1;1;1;1;1	Replication factor C subunit 5	RFC5	>tr|C9JH72|C9JH72_HUMAN Replication factor C subunit 5 (Fragment) OS=Homo sapiens GN=RFC5 PE=4 SV=1;>sp|P40937-2|RFC5_HUMAN Isoform 2 of Replication factor C subunit 5 OS=Homo sapiens GN=RFC5;>sp|P40937|RFC5_HUMAN Replication factor C subunit 5 OS=Homo sap	8	2	2	2	1	1	1	1	1	0	0	0	0	0	1	1	1	1	1	1	1	0	0	0	0	0	1	1	1	1	1	1	1	0	0	0	0	0	1	1	29.8	29.8
C9JI13;O75909;O75909-4;G3V5E1;A8MZK4;O75909-1;C9JSW4;O75909-2;G3V2Q3;G3V235	C9JI13;O75909;O75909-4;G3V5E1;A8MZK4;O75909-1;C9JSW4;O75909-2;G3V2Q3	12;12;12;10;9;9;8;8;7;4	12;12;12;10;9;9;8;8;7;4	12;12;12;10;9;9;8;8;7;4	Cyclin-K	CCNK	>tr|C9JI13|C9JI13_HUMAN Cyclin-K OS=Homo sapiens GN=CCNK PE=3 SV=1;>sp|O75909|CCNK_HUMAN Cyclin-K OS=Homo sapiens GN=CCNK PE=1 SV=2;>sp|O75909-4|CCNK_HUMAN Isoform 4 of Cyclin-K OS=Homo sapiens GN=CCNK;>tr|G3V5E1|G3V5E1_HUMAN Cyclin-K OS=Homo sapiens GN=CC	10	12	12	12	10	11	12	12	11	11	10	11	11	12	11	12	10	11	12	12	11	11	10	11	11	12	11	12	10	11	12	12	11	11	10	11	11	12	11	12	29	29
C9JIM8;F8WC15;G8JLF4;P11166	C9JIM8;F8WC15;G8JLF4;P11166	2;2;2;2	2;2;2;2	2;2;2;2	Solute carrier family 2, facilitated glucose transporter member 1	SLC2A1	>tr|C9JIM8|C9JIM8_HUMAN Solute carrier family 2, facilitated glucose transporter member 1 (Fragment) OS=Homo sapiens GN=SLC2A1 PE=3 SV=1;>tr|F8WC15|F8WC15_HUMAN Solute carrier family 2, facilitated glucose transporter member 1 OS=Homo sapiens GN=SLC2A1 PE=	4	2	2	2	1	1	2	2	1	1	1	2	0	1	2	2	1	1	2	2	1	1	1	2	0	1	2	2	1	1	2	2	1	1	1	2	0	1	2	2	10	10
C9JJ19;P82930;H3BP88	C9JJ19;P82930;H3BP88	2;2;1	2;2;1	2;2;1	28S ribosomal protein S34, mitochondrial	MRPS34	>tr|C9JJ19|C9JJ19_HUMAN 28S ribosomal protein S34, mitochondrial OS=Homo sapiens GN=MRPS34 PE=4 SV=2;>sp|P82930|RT34_HUMAN 28S ribosomal protein S34, mitochondrial OS=Homo sapiens GN=MRPS34 PE=1 SV=2;>tr|H3BP88|H3BP88_HUMAN 28S ribosomal protein S34, mitoc	3	2	2	2	1	2	2	1	1	1	1	2	2	1	2	1	1	2	2	1	1	1	1	2	2	1	2	1	1	2	2	1	1	1	1	2	2	1	2	1	9.8	9.8
C9JKN6;E7EM75;Q9C0I4;F5H5I9	C9JKN6;E7EM75;Q9C0I4;F5H5I9	2;2;2;1	2;2;2;1	2;2;2;1	Thrombospondin type-1 domain-containing protein 7B	THSD7B	>tr|C9JKN6|C9JKN6_HUMAN Thrombospondin type-1 domain-containing protein 7B OS=Homo sapiens GN=THSD7B PE=4 SV=2;>tr|E7EM75|E7EM75_HUMAN Thrombospondin type-1 domain-containing protein 7B OS=Homo sapiens GN=THSD7B PE=4 SV=1;>sp|Q9C0I4|THS7B_HUMAN Thrombospon	4	2	2	2	2	0	1	2	2	1	1	2	2	0	0	0	2	0	1	2	2	1	1	2	2	0	0	0	2	0	1	2	2	1	1	2	2	0	0	0	1.6	1.6
C9JKX0;G8JLP4;I1E4Y4;Q9Y4F3-3;Q9Y4F3-4;Q9Y4F3-5;Q9Y4F3;F8VVB8	C9JKX0;G8JLP4;I1E4Y4;Q9Y4F3-3;Q9Y4F3-4;Q9Y4F3-5;Q9Y4F3	5;5;5;5;5;5;5;2	5;5;5;5;5;5;5;2	5;5;5;5;5;5;5;2	Meiosis arrest female protein 1	KIAA0430	>tr|C9JKX0|C9JKX0_HUMAN Meiosis arrest female protein 1 OS=Homo sapiens GN=KIAA0430 PE=4 SV=1;>tr|G8JLP4|G8JLP4_HUMAN Meiosis arrest female protein 1 OS=Homo sapiens GN=KIAA0430 PE=4 SV=1;>tr|I1E4Y4|I1E4Y4_HUMAN Meiosis arrest female protein 1 OS=Homo sapi	8	5	5	5	1	1	2	2	1	2	1	3	1	2	0	3	1	1	2	2	1	2	1	3	1	2	0	3	1	1	2	2	1	2	1	3	1	2	0	3	5.1	5.1
D6RFJ4;C9JL33;Q8TB68-2;Q8TB68	D6RFJ4;C9JL33;Q8TB68-2;Q8TB68	1;1;1;1	1;1;1;1	1;1;1;1	Proline-rich protein 7	PRR7	>tr|D6RFJ4|D6RFJ4_HUMAN Proline-rich protein 7 (Fragment) OS=Homo sapiens GN=PRR7 PE=4 SV=1;>tr|C9JL33|C9JL33_HUMAN Proline-rich protein 7 OS=Homo sapiens GN=PRR7 PE=4 SV=1;>sp|Q8TB68-2|PRR7_HUMAN Isoform 2 of Proline-rich protein 7 OS=Homo sapiens GN=PRR7	4	1	1	1	0	0	0	0	0	0	0	0	1	0	0	0	0	0	0	0	0	0	0	0	1	0	0	0	0	0	0	0	0	0	0	0	1	0	0	0	16.3	16.3
C9JLF4;Q9NVH0;G5E947	C9JLF4;Q9NVH0;G5E947	1;1;1	1;1;1	1;1;1	Exonuclease 3-5 domain-containing protein 2	EXD2	>tr|C9JLF4|C9JLF4_HUMAN Exonuclease 3-5 domain-containing protein 2 (Fragment) OS=Homo sapiens GN=EXD2 PE=4 SV=1;>sp|Q9NVH0|EXD2_HUMAN Exonuclease 3-5 domain-containing protein 2 OS=Homo sapiens GN=EXD2 PE=1 SV=1;>tr|G5E947|G5E947_HUMAN Exonuclease 3-	3	1	1	1	0	0	0	0	0	0	0	0	0	1	0	0	0	0	0	0	0	0	0	0	0	1	0	0	0	0	0	0	0	0	0	0	0	1	0	0	11.4	11.4
I3L2L5;I3L4Q0;C9JLW8;I3L317;I3L3A7	I3L2L5;I3L4Q0;C9JLW8;I3L317	5;5;5;4;1	5;5;5;4;1	5;5;5;4;1	Protein FAM195B	FAM195B	>tr|I3L2L5|I3L2L5_HUMAN Protein FAM195B OS=Homo sapiens GN=FAM195B PE=4 SV=1;>tr|I3L4Q0|I3L4Q0_HUMAN HCG1818442, isoform CRA_a OS=Homo sapiens GN=FAM195B PE=4 SV=1;>sp|C9JLW8|F195B_HUMAN Protein FAM195B OS=Homo sapiens GN=FAM195B PE=3 SV=1;>tr|I3L317|I3L31	5	5	5	5	1	4	4	3	4	5	3	4	4	4	1	3	1	4	4	3	4	5	3	4	4	4	1	3	1	4	4	3	4	5	3	4	4	4	1	3	60.9	60.9
O95104-2;C9JLZ0;O95104;Q9UPN6;B7Z888	O95104-2;C9JLZ0;O95104;Q9UPN6;B7Z888	2;2;2;1;1	2;2;2;1;1	2;2;2;1;1	Splicing factor, arginine/serine-rich 15;Protein SCAF8	SCAF4;SCAF8	>sp|O95104-2|SFR15_HUMAN Isoform 2 of Splicing factor, arginine/serine-rich 15 OS=Homo sapiens GN=SCAF4;>tr|C9JLZ0|C9JLZ0_HUMAN Splicing factor, arginine/serine-rich 15 OS=Homo sapiens GN=SCAF4 PE=4 SV=2;>sp|O95104|SFR15_HUMAN Splicing factor, arginine/ser	5	2	2	2	0	0	1	0	0	0	0	0	0	0	0	1	0	0	1	0	0	0	0	0	0	0	0	1	0	0	1	0	0	0	0	0	0	0	0	1	4.3	4.3
E9PCB0;C9JME2;Q9Y4F1;Q9Y4F1-2;H0Y6N2	E9PCB0;C9JME2;Q9Y4F1;Q9Y4F1-2;H0Y6N2	2;2;2;2;1	2;2;2;2;1	2;2;2;2;1	FERM, RhoGEF and pleckstrin domain-containing protein 1	FARP1	>tr|E9PCB0|E9PCB0_HUMAN FERM, RhoGEF and pleckstrin domain-containing protein 1 OS=Homo sapiens GN=FARP1 PE=4 SV=1;>tr|C9JME2|C9JME2_HUMAN FERM, RhoGEF and pleckstrin domain-containing protein 1 OS=Homo sapiens GN=FARP1 PE=4 SV=2;>sp|Q9Y4F1|FARP1_HUMAN FER	5	2	2	2	1	2	2	2	1	2	2	2	1	2	2	1	1	2	2	2	1	2	2	2	1	2	2	1	1	2	2	2	1	2	2	2	1	2	2	1	7.5	7.5
H7C107;E9PG60;C9JMG9;Q6DN90;Q6DN90-2;Q9UPP2-2	H7C107;E9PG60;C9JMG9;Q6DN90;Q6DN90-2	22;22;22;22;21;1	17;17;17;17;16;0	17;17;17;17;16;0	IQ motif and SEC7 domain-containing protein 1	IQSEC1	>tr|H7C107|H7C107_HUMAN IQ motif and SEC7 domain-containing protein 1 (Fragment) OS=Homo sapiens GN=IQSEC1 PE=4 SV=1;>tr|E9PG60|E9PG60_HUMAN IQ motif and SEC7 domain-containing protein 1 OS=Homo sapiens GN=IQSEC1 PE=4 SV=1;>tr|C9JMG9|C9JMG9_HUMAN IQ motif	6	22	17	17	19	7	16	11	16	10	14	16	17	10	9	10	14	5	12	8	12	7	11	12	12	8	6	6	14	5	12	8	12	7	11	12	12	8	6	6	29.9	25.2
C9JNJ4;Q8TEJ3	C9JNJ4;Q8TEJ3	6;6	6;6	6;6	SH3 domain-containing RING finger protein 3	SH3RF3	>tr|C9JNJ4|C9JNJ4_HUMAN SH3 domain-containing RING finger protein 3 (Fragment) OS=Homo sapiens GN=SH3RF3 PE=4 SV=1;>sp|Q8TEJ3|SH3R3_HUMAN SH3 domain-containing RING finger protein 3 OS=Homo sapiens GN=SH3RF3 PE=1 SV=2	2	6	6	6	4	4	4	4	3	4	3	3	1	2	1	4	4	4	4	4	3	4	3	3	1	2	1	4	4	4	4	4	3	4	3	3	1	2	1	4	15.5	15.5
C9JXB8;C9JNW5;P83731	C9JXB8;C9JNW5;P83731	5;5;5	5;5;5	5;5;5	60S ribosomal protein L24	RPL24	>tr|C9JXB8|C9JXB8_HUMAN 60S ribosomal protein L24 OS=Homo sapiens GN=RPL24 PE=4 SV=1;>tr|C9JNW5|C9JNW5_HUMAN 60S ribosomal protein L24 OS=Homo sapiens GN=RPL24 PE=4 SV=1;>sp|P83731|RL24_HUMAN 60S ribosomal protein L24 OS=Homo sapiens GN=RPL24 PE=1 SV=1	3	5	5	5	1	2	5	5	5	5	3	5	3	4	3	4	1	2	5	5	5	5	3	5	3	4	3	4	1	2	5	5	5	5	3	5	3	4	3	4	34.7	34.7
C9JP16;Q8NB01;O75718;B3KQR7;B3KUP0	C9JP16;Q8NB01;O75718;B3KQR7;B3KUP0	7;7;7;5;4	7;7;7;5;4	7;7;7;5;4	Cartilage-associated protein	CRTAP	>tr|C9JP16|C9JP16_HUMAN Cartilage-associated protein OS=Homo sapiens GN=CRTAP PE=4 SV=1;>tr|Q8NB01|Q8NB01_HUMAN Cartilage-associated protein OS=Homo sapiens GN=CRTAP PE=2 SV=1;>sp|O75718|CRTAP_HUMAN Cartilage-associated protein OS=Homo sapiens GN=CRTAP PE=	5	7	7	7	6	4	6	6	6	4	7	7	4	3	5	5	6	4	6	6	6	4	7	7	4	3	5	5	6	4	6	6	6	4	7	7	4	3	5	5	20.1	20.1
C9JPC9;Q9H9J4-2;Q9H9J4;E7EWZ4	C9JPC9;Q9H9J4-2;Q9H9J4	9;9;9;4	9;9;9;4	9;9;9;4	Ubiquitin carboxyl-terminal hydrolase 42	USP42	>tr|C9JPC9|C9JPC9_HUMAN Ubiquitin carboxyl-terminal hydrolase 42 (Fragment) OS=Homo sapiens GN=USP42 PE=4 SV=2;>sp|Q9H9J4-2|UBP42_HUMAN Isoform 2 of Ubiquitin carboxyl-terminal hydrolase 42 OS=Homo sapiens GN=USP42;>sp|Q9H9J4|UBP42_HUMAN Ubiquitin carboxyl	4	9	9	9	6	4	5	3	5	6	6	7	5	5	3	4	6	4	5	3	5	6	6	7	5	5	3	4	6	4	5	3	5	6	6	7	5	5	3	4	11.1	11.1
C9JPL0;Q9UK58;Q9UK58-4;Q9UK58-5;H7C4G1	C9JPL0;Q9UK58;Q9UK58-4;Q9UK58-5	13;13;10;7;1	13;13;10;7;1	12;12;9;7;1	Cyclin-L1	CCNL1	>tr|C9JPL0|C9JPL0_HUMAN Cyclin-L1 OS=Homo sapiens GN=CCNL1 PE=3 SV=1;>sp|Q9UK58|CCNL1_HUMAN Cyclin-L1 OS=Homo sapiens GN=CCNL1 PE=1 SV=1;>sp|Q9UK58-4|CCNL1_HUMAN Isoform 2 of Cyclin-L1 OS=Homo sapiens GN=CCNL1;>sp|Q9UK58-5|CCNL1_HUMAN Isoform 3 of Cyclin-L	5	13	13	12	13	10	12	10	9	10	10	11	12	11	11	12	13	10	12	10	9	10	10	11	12	11	11	12	12	9	11	9	8	9	9	10	11	10	10	11	47.2	47.2
C9JQV0;Q9BRJ6;H7C0T1;H7C2R9	C9JQV0;Q9BRJ6;H7C0T1;H7C2R9	6;6;3;3	6;6;3;3	6;6;3;3	Uncharacterized protein C7orf50	C7orf50	>tr|C9JQV0|C9JQV0_HUMAN Uncharacterized protein C7orf50 (Fragment) OS=Homo sapiens GN=C7orf50 PE=4 SV=1;>sp|Q9BRJ6|CG050_HUMAN Uncharacterized protein C7orf50 OS=Homo sapiens GN=C7orf50 PE=1 SV=1;>tr|H7C0T1|H7C0T1_HUMAN Uncharacterized protein C7orf50 (Fra	4	6	6	6	5	6	4	5	4	5	5	4	6	5	6	6	5	6	4	5	4	5	5	4	6	5	6	6	5	6	4	5	4	5	5	4	6	5	6	6	42.7	42.7
C9JR56;Q3ZB87;Q9UPW6;Q01826;Q01826-2	C9JR56;Q3ZB87;Q9UPW6;Q01826;Q01826-2	3;3;3;3;3	3;3;3;3;3	3;3;3;3;3	DNA-binding protein SATB;DNA-binding protein SATB2;DNA-binding protein SATB1	SATB2;SATB1	>tr|C9JR56|C9JR56_HUMAN DNA-binding protein SATB2 OS=Homo sapiens GN=SATB2 PE=3 SV=1;>tr|Q3ZB87|Q3ZB87_HUMAN DNA-binding protein SATB2 OS=Homo sapiens GN=SATB2 PE=2 SV=1;>sp|Q9UPW6|SATB2_HUMAN DNA-binding protein SATB2 OS=Homo sapiens GN=SATB2 PE=1 SV=2;>s	5	3	3	3	1	0	3	1	1	0	0	0	1	0	0	2	1	0	3	1	1	0	0	0	1	0	0	2	1	0	3	1	1	0	0	0	1	0	0	2	4.3	4.3
Q8IX18-3;C9JR60;Q8IX18;F5H625;C9JEW8;Q8IX18-2	Q8IX18-3;C9JR60;Q8IX18;F5H625;C9JEW8;Q8IX18-2	5;5;5;4;4;4	5;5;5;4;4;4	5;5;5;4;4;4	Probable ATP-dependent RNA helicase DHX40	DHX40	>sp|Q8IX18-3|DHX40_HUMAN Isoform 3 of Probable ATP-dependent RNA helicase DHX40 OS=Homo sapiens GN=DHX40;>tr|C9JR60|C9JR60_HUMAN Probable ATP-dependent RNA helicase DHX40 OS=Homo sapiens GN=DHX40 PE=4 SV=2;>sp|Q8IX18|DHX40_HUMAN Probable ATP-dependent RNA	6	5	5	5	3	3	2	1	3	1	2	1	3	4	3	3	3	3	2	1	3	1	2	1	3	4	3	3	3	3	2	1	3	1	2	1	3	4	3	3	7.3	7.3
H0YLX2;C9JU50;H0YLP2;Q2KHR2-2;Q2KHR2	H0YLX2;C9JU50;H0YLP2;Q2KHR2-2;Q2KHR2	5;5;5;5;5	5;5;5;5;5	5;5;5;5;5	DNA-binding protein RFX7	RFX7	>tr|H0YLX2|H0YLX2_HUMAN DNA-binding protein RFX7 OS=Homo sapiens GN=RFX7 PE=4 SV=1;>tr|C9JU50|C9JU50_HUMAN DNA-binding protein RFX7 OS=Homo sapiens GN=RFX7 PE=4 SV=1;>tr|H0YLP2|H0YLP2_HUMAN DNA-binding protein RFX7 OS=Homo sapiens GN=RFX7 PE=4 SV=1;>sp|Q2K	5	5	5	5	2	3	3	4	2	1	1	4	3	3	4	4	2	3	3	4	2	1	1	4	3	3	4	4	2	3	3	4	2	1	1	4	3	3	4	4	5.4	5.4
Q93063;Q93063-2;C9JU51;E9PNL9;E9PJA5	Q93063;Q93063-2;C9JU51	5;5;5;2;1	5;5;5;2;1	5;5;5;2;1	Exostosin-2	EXT2	>sp|Q93063|EXT2_HUMAN Exostosin-2 OS=Homo sapiens GN=EXT2 PE=1 SV=1;>sp|Q93063-2|EXT2_HUMAN Isoform 2 of Exostosin-2 OS=Homo sapiens GN=EXT2;>tr|C9JU51|C9JU51_HUMAN Exostoses (Multiple) 2, isoform CRA_c OS=Homo sapiens GN=EXT2 PE=4 SV=1	5	5	5	5	2	3	2	1	2	2	1	3	3	4	5	2	2	3	2	1	2	2	1	3	3	4	5	2	2	3	2	1	2	2	1	3	3	4	5	2	6.8	6.8
C9JUN6;Q7Z7H5-3;Q7Z7H5-2;Q7Z7H5	C9JUN6;Q7Z7H5-3;Q7Z7H5-2;Q7Z7H5	3;3;3;3	3;3;3;3	3;3;3;3	Transmembrane emp24 domain-containing protein 4	TMED4	>tr|C9JUN6|C9JUN6_HUMAN Transmembrane emp24 domain-containing protein 4 OS=Homo sapiens GN=TMED4 PE=3 SV=1;>sp|Q7Z7H5-3|TMED4_HUMAN Isoform 3 of Transmembrane emp24 domain-containing protein 4 OS=Homo sapiens GN=TMED4;>sp|Q7Z7H5-2|TMED4_HUMAN Isoform 2 of	4	3	3	3	1	1	1	1	2	1	2	1	1	1	2	1	1	1	1	1	2	1	2	1	1	1	2	1	1	1	1	1	2	1	2	1	1	1	2	1	12.3	12.3
C9JV95;Q9NY93;H7C3E9;G3V0G3;F8WDT8;H7BZN7;F8WEI3	C9JV95;Q9NY93;H7C3E9;G3V0G3	26;26;18;17;11;8;5	26;26;18;17;11;8;5	26;26;18;17;11;8;5	Probable ATP-dependent RNA helicase DDX56	DDX56	>tr|C9JV95|C9JV95_HUMAN Probable ATP-dependent RNA helicase DDX56 OS=Homo sapiens GN=DDX56 PE=4 SV=1;>sp|Q9NY93|DDX56_HUMAN Probable ATP-dependent RNA helicase DDX56 OS=Homo sapiens GN=DDX56 PE=1 SV=1;>tr|H7C3E9|H7C3E9_HUMAN Probable ATP-dependent RNA heli	7	26	26	26	21	21	24	19	17	19	18	21	18	20	25	22	21	21	24	19	17	19	18	21	18	20	25	22	21	21	24	19	17	19	18	21	18	20	25	22	65.3	65.3
C9JX01;Q9UM00-2;Q9UM00	C9JX01;Q9UM00-2;Q9UM00	3;3;3	3;3;3	3;3;3	Transmembrane and coiled-coil domain-containing protein 1	TMCO1	>tr|C9JX01|C9JX01_HUMAN Transmembrane and coiled-coil domain-containing protein 1 OS=Homo sapiens GN=TMCO1 PE=4 SV=2;>sp|Q9UM00-2|TMCO1_HUMAN Isoform 2 of Transmembrane and coiled-coil domain-containing protein 1 OS=Homo sapiens GN=TMCO1;>sp|Q9UM00|TMCO1_H	3	3	3	3	2	2	3	2	2	3	3	2	3	3	3	3	2	2	3	2	2	3	3	2	3	3	3	3	2	2	3	2	2	3	3	2	3	3	3	3	21.9	21.9
C9JX11;Q99967-2;Q99967	C9JX11;Q99967-2;Q99967	4;4;4	4;4;4	4;4;4	Cbp/p300-interacting transactivator 2	CITED2	>tr|C9JX11|C9JX11_HUMAN Cbp/p300-interacting transactivator 2 OS=Homo sapiens GN=CITED2 PE=4 SV=1;>sp|Q99967-2|CITE2_HUMAN Isoform 2 of Cbp/p300-interacting transactivator 2 OS=Homo sapiens GN=CITED2;>sp|Q99967|CITE2_HUMAN Cbp/p300-interacting transactivat	3	4	4	4	4	3	3	4	3	2	2	2	3	2	3	2	4	3	3	4	3	2	2	2	3	2	3	2	4	3	3	4	3	2	2	2	3	2	3	2	35	35
C9JX83;O00566	C9JX83;O00566	1;1	1;1	1;1	U3 small nucleolar ribonucleoprotein protein MPP10	MPHOSPH10	>tr|C9JX83|C9JX83_HUMAN U3 small nucleolar ribonucleoprotein protein MPP10 OS=Homo sapiens GN=MPHOSPH10 PE=4 SV=1;>sp|O00566|MPP10_HUMAN U3 small nucleolar ribonucleoprotein protein MPP10 OS=Homo sapiens GN=MPHOSPH10 PE=1 SV=2	2	1	1	1	0	0	0	0	0	0	0	0	0	0	1	0	0	0	0	0	0	0	0	0	0	0	1	0	0	0	0	0	0	0	0	0	0	0	1	0	3.3	3.3
C9JXK0;Q14739	C9JXK0;Q14739	3;3	3;3	3;3	Lamin-B receptor	LBR	>tr|C9JXK0|C9JXK0_HUMAN Lamin-B receptor (Fragment) OS=Homo sapiens GN=LBR PE=4 SV=1;>sp|Q14739|LBR_HUMAN Lamin-B receptor OS=Homo sapiens GN=LBR PE=1 SV=2	2	3	3	3	1	2	3	1	1	3	3	2	2	2	3	2	1	2	3	1	1	3	3	2	2	2	3	2	1	2	3	1	1	3	3	2	2	2	3	2	15.5	15.5
C9JYI4;P52294;C9J352;C9JWD9;F2Z3G4;C9J4U1	C9JYI4;P52294;C9J352;C9JWD9;F2Z3G4;C9J4U1	3;3;2;2;2;2	3;3;2;2;2;2	2;2;2;2;2;2	Importin subunit alpha-5;Importin subunit alpha-5, N-terminally processed	KPNA1	>tr|C9JYI4|C9JYI4_HUMAN Importin subunit alpha-1 (Fragment) OS=Homo sapiens GN=KPNA1 PE=4 SV=1;>sp|P52294|IMA1_HUMAN Importin subunit alpha-1 OS=Homo sapiens GN=KPNA1 PE=1 SV=3;>tr|C9J352|C9J352_HUMAN Importin subunit alpha-1 (Fragment) OS=Homo sapiens GN=	6	3	3	2	0	1	0	0	0	0	2	0	0	0	0	0	0	1	0	0	0	0	2	0	0	0	0	0	0	1	0	0	0	0	1	0	0	0	0	0	11.6	11.6
E9PIE5;C9JZR2;F8WA43;O60716-32;O60716-31;O60716-29;O60716-27;O60716-30;O60716-28;O60716-26;O60716-25;O60716-24;O60716-23;O60716-21;O60716-19;O60716-22;O60716-20;O60716-16;O60716-18;O60716-15;O60716-17;O60716-13;O60716-11;O60716-14;O60716-12;O60716-10;O60716-8;O60716-9;O60716-7;O60716-5;O60716-3;O60716-6;O60716-4;O60716-2;O60716	E9PIE5;C9JZR2;F8WA43;O60716-32;O60716-31;O60716-29;O60716-27;O60716-30;O60716-28;O60716-26;O60716-25;O60716-24;O60716-23;O60716-21;O60716-19;O60716-22;O60716-20;O60716-16;O60716-18;O60716-15;O60716-17;O60716-13;O60716-11;O60716-14;O60716-12;O60716-10;O60716-8;O60716-9;O60716-7;O60716-5;O60716-3;O60716-6;O60716-4;O60716-2;O60716	2;2;2;2;2;2;2;2;2;2;2;2;2;2;2;2;2;2;2;2;2;2;2;2;2;2;2;2;2;2;2;2;2;2;2	2;2;2;2;2;2;2;2;2;2;2;2;2;2;2;2;2;2;2;2;2;2;2;2;2;2;2;2;2;2;2;2;2;2;2	2;2;2;2;2;2;2;2;2;2;2;2;2;2;2;2;2;2;2;2;2;2;2;2;2;2;2;2;2;2;2;2;2;2;2	Catenin delta-1	CTNND1	>tr|E9PIE5|E9PIE5_HUMAN Catenin delta-1 OS=Homo sapiens GN=CTNND1 PE=4 SV=1;>tr|C9JZR2|C9JZR2_HUMAN Catenin delta-1 OS=Homo sapiens GN=CTNND1 PE=4 SV=2;>tr|F8WA43|F8WA43_HUMAN Catenin delta-1 OS=Homo sapiens GN=CTNND1 PE=4 SV=1;>sp|O60716-32|CTND1_HUMAN Is	35	2	2	2	0	1	1	0	1	1	0	2	0	0	0	1	0	1	1	0	1	1	0	2	0	0	0	1	0	1	1	0	1	1	0	2	0	0	0	1	2.9	2.9
CON__ENSEMBL:ENSBTAP00000038253	CON__ENSEMBL:ENSBTAP00000038253	12	1	1			>ENSEMBL:ENSBTAP00000038253 (Bos taurus) 63 kDa protein	1	12	1	1	10	10	10	9	11	11	11	10	9	11	10	11	0	0	0	0	1	1	0	0	0	1	0	0	0	0	0	0	1	1	0	0	0	1	0	0	16.7	1.8
CON__ENSEMBL:ENSP00000377550;P13646-3;P13646;C9JA77;P13646-2	CON__ENSEMBL:ENSP00000377550;P13646-3;P13646;C9JA77;P13646-2	15;15;15;12;12	8;8;8;7;7	0;0;0;0;0	Keratin, type I cytoskeletal 13	KRT13	>ENSEMBL:ENSP00000377550 Tax_Id=9606 Gene_Symbol=KRT13 46 kDa protein;>sp|P13646-3|K1C13_HUMAN Isoform 3 of Keratin, type I cytoskeletal 13 OS=Homo sapiens GN=KRT13;>sp|P13646|K1C13_HUMAN Keratin, type I cytoskeletal 13 OS=Homo sapiens GN=KRT13 PE=1 SV=4;>	5	15	8	0	9	8	12	6	9	9	9	6	9	5	8	11	2	2	5	0	2	2	2	0	2	0	2	4	0	0	0	0	0	0	0	0	0	0	0	0	31.4	19.5
CON__P00761	CON__P00761	6	6	6			>P00761 SWISS-PROT:P00761|TRYP_PIG Trypsin - Sus scrofa (Pig).	1	6	6	6	5	5	5	5	4	4	4	4	4	6	5	5	5	5	5	5	4	4	4	4	4	6	5	5	5	5	5	5	4	4	4	4	4	6	5	5	26.8	26.8
CON__P02533;P02533;CON__A2A4G1;A8MT21;CON__P35900;CON__Q9D312;B3KRA2;P35900;C9JTG5;CON__Q8N1A0;Q8N1A0-2;Q8N1A0	CON__P02533;P02533	50;50;10;4;4;4;4;4;2;1;1;1	32;32;4;0;0;0;0;0;0;0;0;0	9;9;0;0;0;0;0;0;0;0;0;0	Keratin, type I cytoskeletal 14	KRT14	>P02533 SWISS-PROT:P02533 Tax_Id=9606 Gene_Symbol=KRT14 Keratin, type I cytoskeletal 14;>sp|P02533|K1C14_HUMAN Keratin, type I cytoskeletal 14 OS=Homo sapiens GN=KRT14 PE=1 SV=4	12	50	32	9	46	43	44	46	40	44	41	45	44	45	48	46	30	28	28	30	25	28	26	29	28	29	31	31	9	7	9	9	7	9	7	9	9	8	9	8	76.7	61.2
CON__P02538;P02538;E7EUE8;CON__Q8VED5	CON__P02538;P02538;E7EUE8	54;54;51;9	52;52;49;7	4;4;3;0	Keratin, type II cytoskeletal 6A	KRT6A	>P02538 SWISS-PROT:P02538 Tax_Id=9606 Gene_Symbol=KRT6A Keratin, type II cytoskeletal 6A;>sp|P02538|K2C6A_HUMAN Keratin, type II cytoskeletal 6A OS=Homo sapiens GN=KRT6A PE=1 SV=3;>tr|E7EUE8|E7EUE8_HUMAN Keratin, type II cytoskeletal 6A OS=Homo sapiens GN=	4	54	52	4	48	46	51	48	42	45	47	47	48	46	49	48	46	44	49	46	40	43	45	45	46	44	47	46	3	3	3	3	2	2	2	3	4	3	3	3	65.2	64
CON__P02662	CON__P02662	1	1	1			>P02662 SWISS-PROT:P02662 Alpha-S1-casein - Bos taurus (Bovine).	1	1	1	1	0	0	0	1	0	0	0	0	0	0	0	0	0	0	0	1	0	0	0	0	0	0	0	0	0	0	0	1	0	0	0	0	0	0	0	0	7.5	7.5
CON__P02754	CON__P02754	1	1	1			>P02754 SWISS-PROT:P02754 Beta-lactoglobulin - Bos taurus (Bovine).	1	1	1	1	0	1	0	1	0	0	0	0	0	0	1	1	0	1	0	1	0	0	0	0	0	0	1	1	0	1	0	1	0	0	0	0	0	0	1	1	8.6	8.6
CON__P02768-1;E7ESU5;P02768;H0YA55;B7WNR0;Q8IUK7;C9JKR2;D6RHD5;P02768-2;H7C013;CON__P02769	CON__P02768-1;E7ESU5;P02768;H0YA55;B7WNR0;Q8IUK7;C9JKR2;D6RHD5;P02768-2	19;19;19;14;14;13;13;13;13;6;4	19;19;19;14;14;13;13;13;13;6;4	19;19;19;14;14;13;13;13;13;6;4	Serum albumin	ALB	>P02768-1 SWISS-PROT:P02768-1 Tax_Id=9606 Gene_Symbol=ALB Isoform 1 of Serum albumin precursor;>tr|E7ESU5|E7ESU5_HUMAN Serum albumin OS=Homo sapiens GN=ALB PE=4 SV=2;>sp|P02768|ALBU_HUMAN Serum albumin OS=Homo sapiens GN=ALB PE=1 SV=2;>tr|H0YA55|H0YA55_HUM	11	19	19	19	5	8	5	9	3	7	8	6	2	19	16	6	5	8	5	9	3	7	8	6	2	19	16	6	5	8	5	9	3	7	8	6	2	19	16	6	33.2	33.2
CON__P04259;B4DXK4;Q8IWY7	CON__P04259	53;3;1	5;0;0	0;0;0			>P04259 SWISS-PROT:P04259 Tax_Id=9606 Gene_Symbol=KRT6B Keratin, type II cytoskeletal 6B	3	53	5	0	47	46	50	48	42	46	47	48	46	46	49	47	3	4	4	4	3	4	3	5	4	4	4	3	0	0	0	0	0	0	0	0	0	0	0	0	65.2	10.5
CON__P05787;P05787;F8VXB4;F8VUG2;F8VU64;F8W1U3;CON__H-INV:HIT000292931;E7ES34;CON__Q9DCV7;CON__Q3KNV1;CON__P08729;P08729;F8VP67;Q9H552;CON__Q9H552;H0YIB2	CON__P05787;P05787;F8VXB4;F8VUG2;F8VU64;F8W1U3	10;10;10;8;8;6;4;4;4;4;4;4;3;3;3;1	2;2;2;2;2;1;2;0;0;0;0;0;1;0;0;1	2;2;2;2;2;1;2;0;0;0;0;0;1;0;0;1	Keratin, type II cytoskeletal 8	KRT8	>P05787 SWISS-PROT:P05787 Tax_Id=9606 Gene_Symbol=KRT8 Keratin, type II cytoskeletal 8;>sp|P05787|K2C8_HUMAN Keratin, type II cytoskeletal 8 OS=Homo sapiens GN=KRT8 PE=1 SV=7;>tr|F8VXB4|F8VXB4_HUMAN Keratin, type II cytoskeletal 8 OS=Homo sapiens GN=KRT8 P	16	10	2	2	7	6	6	8	5	7	7	7	6	6	7	7	2	0	0	1	0	1	1	0	0	0	1	1	2	0	0	1	0	1	1	0	0	0	1	1	15.5	5
CON__P08727;P08727;C9JM50	CON__P08727;P08727;C9JM50	14;14;13	2;2;2	1;1;1	Keratin, type I cytoskeletal 19	KRT19	>P08727 SWISS-PROT:P08727 Tax_Id=9606 Gene_Symbol=KRT19 Keratin, type I cytoskeletal 19;>sp|P08727|K1C19_HUMAN Keratin, type I cytoskeletal 19 OS=Homo sapiens GN=KRT19 PE=1 SV=4;>tr|C9JM50|C9JM50_HUMAN Keratin, type I cytoskeletal 19 (Fragment) OS=Homo sap	3	14	2	1	13	10	12	12	10	11	11	10	10	13	13	12	2	1	1	1	1	1	1	1	1	2	1	1	1	0	1	0	0	0	0	0	0	1	0	0	23.2	4.5
CON__P08779;P08779;CON__Q9Z2K1;CON__Q3ZAW8	CON__P08779;P08779	47;47;15;15	28;28;5;5	25;25;5;5	Keratin, type I cytoskeletal 16	KRT16	>P08779 SWISS-PROT:P08779 Tax_Id=9606 Gene_Symbol=KRT16 Keratin, type I cytoskeletal 16;>sp|P08779|K1C16_HUMAN Keratin, type I cytoskeletal 16 OS=Homo sapiens GN=KRT16 PE=1 SV=4	4	47	28	25	45	41	41	46	39	40	42	40	42	41	46	44	26	22	24	28	22	23	24	23	23	22	27	25	23	22	21	25	22	22	22	23	22	22	24	23	77.2	55.4
CON__P12035;P12035	CON__P12035;P12035	15;15	3;3	2;2	Keratin, type II cytoskeletal 3	KRT3	>P12035 SWISS-PROT:P12035 Tax_Id=9606 Gene_Symbol=KRT3 Keratin, type II cytoskeletal 3;>sp|P12035|K2C3_HUMAN Keratin, type II cytoskeletal 3 OS=Homo sapiens GN=KRT3 PE=1 SV=3	2	15	3	2	11	9	14	11	9	10	10	12	10	11	10	11	1	0	2	0	0	0	1	1	0	1	0	1	1	0	1	0	0	0	0	1	0	1	0	0	15.7	5.7
CON__P13645;P13645;CON__P02535-1;CON__Q7Z3Y7;Q7Z3Y7;CON__Q148H6;CON__Q7Z3Z0;CON__Q7Z3Y8;CON__Q99456;CON__Q2M2I5;Q7Z3Z0;Q7Z3Y8;Q99456;Q2M2I5;E7ENV4;CON__Q14525;CON__Q9UE12;CON__Q15323;CON__A2A5Y0;CON__Q92764;C4AM86;CON__Q14532;CON__A2AB72;CON__Q497I4;CON__O76015;CON__O76013;CON__Q7Z3Y9;CON__O76014;CON__REFSEQ:XP_986630;Q14525;Q15323;O76013-2;Q14532;O76014;Q92764;O76015;O76013;Q7Z3Y9	CON__P13645;P13645	45;45;13;4;4;3;2;2;2;2;2;2;2;2;1;1;1;1;1;1;1;1;1;1;1;1;1;1;1;1;1;1;1;1;1;1;1;1	39;39;11;2;2;1;1;1;0;1;1;1;0;1;0;0;0;0;0;0;0;0;0;0;0;0;0;0;0;0;0;0;0;0;0;0;0;0	37;37;9;2;2;1;1;1;0;0;1;1;0;0;0;0;0;0;0;0;0;0;0;0;0;0;0;0;0;0;0;0;0;0;0;0;0;0	Keratin, type I cytoskeletal 10	KRT10	>P13645 SWISS-PROT:P13645 Tax_Id=9606 Gene_Symbol=KRT10 Keratin, type I cytoskeletal 10;>sp|P13645|K1C10_HUMAN Keratin, type I cytoskeletal 10 OS=Homo sapiens GN=KRT10 PE=1 SV=6	38	45	39	37	37	40	35	38	36	36	37	43	41	36	38	38	31	34	31	33	32	32	32	38	35	30	32	32	29	33	29	31	30	30	30	36	33	29	31	30	63.7	59.5
CON__P13647;P13647;E7EU87;H0YI76;F8W0C6;H0YIN9;F8VV57	CON__P13647;P13647;E7EU87	49;49;44;20;18;14;7	30;30;25;15;4;12;7	9;9;6;5;0;1;3	Keratin, type II cytoskeletal 5	KRT5	>P13647 SWISS-PROT:P13647 Tax_Id=9606 Gene_Symbol=KRT5 Keratin, type II cytoskeletal 5;>sp|P13647|K2C5_HUMAN Keratin, type II cytoskeletal 5 OS=Homo sapiens GN=KRT5 PE=1 SV=3;>tr|E7EU87|E7EU87_HUMAN Keratin, type II cytoskeletal 5 OS=Homo sapiens GN=KRT5 P	7	49	30	9	43	45	42	44	41	43	42	45	45	44	46	43	28	29	25	27	26	27	26	27	28	28	29	27	9	9	8	8	9	9	9	9	9	9	9	8	59	40.5
F5H8K9;CON__P19013;F8VS64;P19013	F5H8K9;CON__P19013;F8VS64;P19013	11;11;11;11	7;7;7;7	6;6;6;6	Keratin, type II cytoskeletal 4	KRT4	>tr|F5H8K9|F5H8K9_HUMAN Keratin, type II cytoskeletal 4 OS=Homo sapiens GN=KRT4 PE=3 SV=1;>P19013 SWISS-PROT:P19013 Tax_Id=9606 Gene_Symbol=KRT4 keratin 4;>tr|F8VS64|F8VS64_HUMAN Keratin, type II cytoskeletal 4 OS=Homo sapiens GN=KRT4 PE=3 SV=1;>sp|P19013|	4	11	7	6	3	5	5	3	3	3	4	3	3	3	5	11	0	2	1	0	0	0	0	0	1	0	2	7	0	1	1	0	0	0	0	0	0	0	2	6	19.2	15
CON__P20930;P20930	CON__P20930;P20930	2;2	2;2	2;2	Filaggrin	FLG	>P20930 SWISS-PROT:P20930 Tax_Id=9606 Gene_Symbol=FLG Filaggrin;>sp|P20930|FILA_HUMAN Filaggrin OS=Homo sapiens GN=FLG PE=1 SV=3	2	2	2	2	0	0	0	1	0	0	1	0	0	2	1	1	0	0	0	1	0	0	1	0	0	2	1	1	0	0	0	1	0	0	1	0	0	2	1	1	0.5	0.5
E7EQV7;CON__P48668;P48668	E7EQV7;CON__P48668;P48668	51;51;51	1;1;1	1;1;1	Keratin, type II cytoskeletal 6C	KRT6C	>tr|E7EQV7|E7EQV7_HUMAN Keratin, type II cytoskeletal 6C OS=Homo sapiens GN=KRT6C PE=3 SV=2;>P48668 SWISS-PROT:P48668 Tax_Id=9606 Gene_Symbol=KRT6C Keratin, type II cytoskeletal 6C;>sp|P48668|K2C6C_HUMAN Keratin, type II cytoskeletal 6C OS=Homo sapiens GN=	3	51	1	1	45	45	48	47	42	45	46	46	46	45	48	45	0	0	1	1	0	0	0	0	0	0	1	0	0	0	1	1	0	0	0	0	0	0	1	0	65.8	2.7
CON__Q04695;Q04695	CON__Q04695;Q04695	46;46	4;4	2;2	Keratin, type I cytoskeletal 17	KRT17	>Q04695 SWISS-PROT:Q04695 Tax_Id=9606 Gene_Symbol=KRT17 Keratin, type I cytoskeletal 17;>sp|Q04695|K1C17_HUMAN Keratin, type I cytoskeletal 17 OS=Homo sapiens GN=KRT17 PE=1 SV=2	2	46	4	2	35	31	36	41	30	36	35	35	36	35	42	37	3	3	2	4	3	3	3	3	3	3	3	3	1	1	0	2	1	1	1	1	1	1	1	1	72.5	8.8
CON__Q7RTS7;CON__Q32MB2;F8W1S1;Q7RTS7;Q86Y46;CON__Q3SY84;Q86Y46-2;Q3SY84;H0YIC5;H0YIG3	CON__Q7RTS7;CON__Q32MB2;F8W1S1;Q7RTS7;Q86Y46;CON__Q3SY84;Q86Y46-2;Q3SY84;H0YIC5	7;7;7;7;7;5;5;5;4;1	1;1;1;1;1;1;1;1;0;1	0;0;0;0;0;0;0;0;0;0	Keratin, type II cytoskeletal 74;Keratin, type II cytoskeletal 73;Keratin, type II cytoskeletal 71	KRT74;KRT73;KRT71	>Q7RTS7 SWISS-PROT:Q7RTS7 Tax_Id=9606 Gene_Symbol=KRT74 Keratin, type II cytoskeletal 74;>Q32MB2 TREMBL:Q32MB2;Q86Y46 Tax_Id=9606 Gene_Symbol=KRT73 Keratin-73;>tr|F8W1S1|F8W1S1_HUMAN Keratin, type II cytoskeletal 74 OS=Homo sapiens GN=KRT74 PE=3 SV=1;>sp|Q	10	7	1	0	4	5	6	5	5	4	7	5	5	5	6	7	0	1	1	1	1	0	1	1	1	1	1	1	0	0	0	0	0	0	0	0	0	0	0	0	7.9	2.3
CON__Q3SZV7	CON__Q3SZV7	1	1	1			>Q3SZV7 TREMBL:Q3SZV7 (Bos taurus) Similar to hemopexin	1	1	1	1	0	0	0	0	1	1	1	0	0	0	0	0	0	0	0	0	1	1	1	0	0	0	0	0	0	0	0	0	1	1	1	0	0	0	0	0	3.5	3.5
CON__Q3Y5Z3	CON__Q3Y5Z3	5	5	5			>Q3Y5Z3 SWISS-PROT:Q3Y5Z3 (Bos taurus) Adiponectin precursor	1	5	5	5	3	4	5	4	4	4	4	4	2	3	3	3	3	4	5	4	4	4	4	4	2	3	3	3	3	4	5	4	4	4	4	4	2	3	3	3	25.4	25.4
CON__Q5D862;Q5D862	CON__Q5D862;Q5D862	13;13	13;13	13;13	Filaggrin-2	FLG2	>Q5D862 SWISS-PROT:Q5D862 Tax_Id=9606 Gene_Symbol=FLG2 Filaggrin-2;>sp|Q5D862|FILA2_HUMAN Filaggrin-2 OS=Homo sapiens GN=FLG2 PE=1 SV=1	2	13	13	13	6	4	5	11	2	4	4	5	2	7	6	5	6	4	5	11	2	4	4	5	2	7	6	5	6	4	5	11	2	4	4	5	2	7	6	5	11.1	11.1
CON__Q5XKE5;Q5XKE5;H0YID6	CON__Q5XKE5;Q5XKE5	12;12;4	1;1;0	1;1;0	Keratin, type II cytoskeletal 79	KRT79	>Q5XKE5 SWISS-PROT:Q5XKE5 Tax_Id=9606 Gene_Symbol=KRT79 Keratin, type II cytoskeletal 79;>sp|Q5XKE5|K2C79_HUMAN Keratin, type II cytoskeletal 79 OS=Homo sapiens GN=KRT79 PE=1 SV=2	3	12	1	1	9	9	11	11	9	9	8	10	10	9	9	9	0	0	0	1	0	0	0	0	0	0	0	0	0	0	0	1	0	0	0	0	0	0	0	0	16.6	1.9
CON__Q5XQN5;CON__Q922U2;F8VRG4;F8VZY5;F5GZD1;CON__Q9NSB2;CON__Q6ISB0;Q9NSB2;F8VU69;H0YHD9;F8VS61;CON__REFSEQ:XP_932229	CON__Q5XQN5;CON__Q922U2	36;26;3;3;3;3;3;3;2;1;1;1	1;1;0;0;0;0;0;0;0;0;0;0	0;0;0;0;0;0;0;0;0;0;0;0			>Q5XQN5 SWISS-PROT:Q5XQN5 (Bos taurus) Keratin, type II cytoskeletal 5;>Q922U2 SWISS-PROT:Q922U2 Tax_Id=10090 Gene_Symbol=Krt5 Keratin, type II cytoskeletal 5	12	36	1	0	31	32	29	32	28	31	30	32	32	30	33	32	0	1	0	0	0	1	0	1	0	0	1	0	0	0	0	0	0	0	0	0	0	0	0	0	40.9	1.5
CON__Q61782	CON__Q61782	8	1	1			>Q61782 TREMBL:Q61782 Tax_Id=10090 Gene_Symbol=Krt14 Type I epidermal keratin (Fragment)	1	8	1	1	8	8	8	8	8	8	8	8	8	8	7	8	1	1	1	1	1	1	1	1	1	1	0	1	1	1	1	1	1	1	1	1	1	1	0	1	59.1	10.8
CON__Q6IFX2	CON__Q6IFX2	27	2	1			>Q6IFX2 SWISS-PROT:Q6IFX2 Tax_Id=10090 Gene_Symbol=Krt42 Keratin, type I cytoskeletal 42	1	27	2	1	25	21	25	25	20	22	21	21	19	20	25	25	2	2	2	1	1	1	1	0	1	0	1	2	1	1	1	1	0	0	0	0	0	0	0	1	39.2	6
CON__Q6KB66-1;Q6KB66-2;Q6KB66;Q6KB66-3;CON__Q0VBK2	CON__Q6KB66-1;Q6KB66-2;Q6KB66;Q6KB66-3	17;17;17;13;4	17;17;17;13;4	17;17;17;13;4	Keratin, type II cytoskeletal 80	KRT80	>Q6KB66-1 SWISS-PROT:Q6KB66-1 Tax_Id=9606 Gene_Symbol=KRT80 Isoform 1 of Keratin, type II cytoskeletal 80;>sp|Q6KB66-2|K2C80_HUMAN Isoform 2 of Keratin, type II cytoskeletal 80 OS=Homo sapiens GN=KRT80;>sp|Q6KB66|K2C80_HUMAN Keratin, type II cytoskeletal 8	5	17	17	17	14	13	5	17	6	9	10	11	5	13	16	14	14	13	5	17	6	9	10	11	5	13	16	14	14	13	5	17	6	9	10	11	5	13	16	14	40.7	40.7
CON__Q7Z794;Q7Z794;F5GY66	CON__Q7Z794;Q7Z794	5;5;2	2;2;2	2;2;2	Keratin, type II cytoskeletal 1b	KRT77	>Q7Z794 SWISS-PROT:Q7Z794 Tax_Id=9606 Gene_Symbol=KRT77 Keratin 77;>sp|Q7Z794|K2C1B_HUMAN Keratin, type II cytoskeletal 1b OS=Homo sapiens GN=KRT77 PE=1 SV=3	3	5	2	2	5	4	4	4	3	3	4	4	3	4	4	3	2	1	1	1	0	0	1	1	0	1	1	0	2	1	1	1	0	0	1	1	0	1	1	0	7.6	4
CON__Q86YZ3;Q86YZ3	CON__Q86YZ3;Q86YZ3	13;13	13;13	13;13	Hornerin	HRNR	>Q86YZ3 SWISS-PROT:Q86YZ3 Tax_Id=9606 Gene_Symbol=HRNR Hornerin;>sp|Q86YZ3|HORN_HUMAN Hornerin OS=Homo sapiens GN=HRNR PE=1 SV=2	2	13	13	13	7	5	5	9	7	9	7	7	4	11	8	7	7	5	5	9	7	9	7	7	4	11	8	7	7	5	5	9	7	9	7	7	4	11	8	7	11.8	11.8
CON__Q9C075;I3L3Q6;Q9C075	CON__Q9C075;I3L3Q6;Q9C075	2;2;2	2;2;2	2;2;2	Keratin, type I cytoskeletal 23	KRT23	>Q9C075 SWISS-PROT:Q9C075 Tax_Id=9606 Gene_Symbol=KRT23 Keratin, type I cytoskeletal 23;>tr|I3L3Q6|I3L3Q6_HUMAN Keratin, type I cytoskeletal 23 OS=Homo sapiens GN=KRT23 PE=4 SV=1;>sp|Q9C075|K1C23_HUMAN Keratin, type I cytoskeletal 23 OS=Homo sapiens GN=KRT	3	2	2	2	0	1	0	1	0	1	1	0	0	1	0	1	0	1	0	1	0	1	1	0	0	1	0	1	0	1	0	1	0	1	1	0	0	1	0	1	5.7	5.7
D3DPQ1;Q96BR9-2;Q96BR9	D3DPQ1;Q96BR9-2;Q96BR9	1;1;1	1;1;1	1;1;1	Zinc finger and BTB domain-containing protein 8A	ZBTB8A	>tr|D3DPQ1|D3DPQ1_HUMAN HCG39683, isoform CRA_a OS=Homo sapiens GN=ZBTB8A PE=4 SV=1;>sp|Q96BR9-2|ZBT8A_HUMAN Isoform 2 of Zinc finger and BTB domain-containing protein 8A OS=Homo sapiens GN=ZBTB8A;>sp|Q96BR9|ZBT8A_HUMAN Zinc finger and BTB domain-containin	3	1	1	1	1	1	1	0	0	1	1	1	1	1	1	1	1	1	1	0	0	1	1	1	1	1	1	1	1	1	1	0	0	1	1	1	1	1	1	1	4.4	4.4
E9PCV8;H0Y3P2;D3DQV9;P78344-2;P78344;E9PKF8;H0YE22	E9PCV8;H0Y3P2;D3DQV9;P78344-2;P78344;E9PKF8;H0YE22	3;3;3;3;3;2;2	3;3;3;3;3;2;2	3;3;3;3;3;2;2	Eukaryotic translation initiation factor 4 gamma 2	EIF4G2	>tr|E9PCV8|E9PCV8_HUMAN Eukaryotic translation initiation factor 4 gamma 2 OS=Homo sapiens GN=EIF4G2 PE=4 SV=1;>tr|H0Y3P2|H0Y3P2_HUMAN Eukaryotic translation initiation factor 4 gamma 2 OS=Homo sapiens GN=EIF4G2 PE=4 SV=1;>tr|D3DQV9|D3DQV9_HUMAN Eukaryotic	7	3	3	3	1	1	2	1	1	1	0	1	1	1	0	0	1	1	2	1	1	1	0	1	1	1	0	0	1	1	2	1	1	1	0	1	1	1	0	0	13.4	13.4
D3DU85;Q15599-2;H3BSA4;H3BUQ9;H3BMF5	D3DU85;Q15599-2	24;23;11;9;7	1;0;0;0;0	1;0;0;0;0	Na(+)/H(+) exchange regulatory cofactor NHE-RF2	SLC9A3R2	>tr|D3DU85|D3DU85_HUMAN Na(+)/H(+) exchange regulatory cofactor NHE-RF2 OS=Homo sapiens GN=SLC9A3R2 PE=4 SV=1;>sp|Q15599-2|NHRF2_HUMAN Isoform 2 of Na(+)/H(+) exchange regulatory cofactor NHE-RF2 OS=Homo sapiens GN=SLC9A3R2	5	24	1	1	19	18	18	17	19	19	20	20	21	18	20	18	1	1	1	1	1	1	1	1	1	1	1	1	1	1	1	1	1	1	1	1	1	1	1	1	73.6	7.7
D3YTB1;F8W727;P62910	D3YTB1;F8W727;P62910	5;5;5	5;5;5	5;5;5	60S ribosomal protein L32	RPL32	>tr|D3YTB1|D3YTB1_HUMAN 60S ribosomal protein L32 (Fragment) OS=Homo sapiens GN=RPL32 PE=4 SV=1;>tr|F8W727|F8W727_HUMAN 60S ribosomal protein L32 OS=Homo sapiens GN=RPL32 PE=4 SV=1;>sp|P62910|RL32_HUMAN 60S ribosomal protein L32 OS=Homo sapiens GN=RPL32 PE	3	5	5	5	4	0	4	3	2	2	4	1	2	2	1	2	4	0	4	3	2	2	4	1	2	2	1	2	4	0	4	3	2	2	4	1	2	2	1	2	36.8	36.8
F5GY92;D4PHA4;Q86WP2;Q86WP2-2;Q86WP2-3;Q86WP2-4	F5GY92;D4PHA4;Q86WP2;Q86WP2-2;Q86WP2-3;Q86WP2-4	10;10;10;10;9;6	10;10;10;10;9;6	10;10;10;10;9;6	Vasculin	GPBP1	>tr|F5GY92|F5GY92_HUMAN Vasculin OS=Homo sapiens GN=GPBP1 PE=4 SV=1;>tr|D4PHA4|D4PHA4_HUMAN GC-rich promoter binding protein 1, isoform CRA_c OS=Homo sapiens GN=GPBP1 PE=4 SV=1;>sp|Q86WP2|GPBP1_HUMAN Vasculin OS=Homo sapiens GN=GPBP1 PE=1 SV=1;>sp|Q86WP2-2	6	10	10	10	5	7	9	7	6	6	6	6	7	6	5	7	5	7	9	7	6	6	6	6	7	6	5	7	5	7	9	7	6	6	6	6	7	6	5	7	30.4	30.4
D6RCT6;D6RIA0;D6R9E3;Q9BWT6	D6RCT6;D6RIA0;D6R9E3;Q9BWT6	1;1;1;1	1;1;1;1	1;1;1;1	Meiotic nuclear division protein 1 homolog	MND1	>tr|D6RCT6|D6RCT6_HUMAN Meiotic nuclear division protein 1 homolog (Fragment) OS=Homo sapiens GN=MND1 PE=4 SV=1;>tr|D6RIA0|D6RIA0_HUMAN Meiotic nuclear division protein 1 homolog OS=Homo sapiens GN=MND1 PE=4 SV=1;>tr|D6R9E3|D6R9E3_HUMAN Meiotic nuclear div	4	1	1	1	0	1	0	0	1	1	0	0	1	0	0	1	0	1	0	0	1	1	0	0	1	0	0	1	0	1	0	0	1	1	0	0	1	0	0	1	9.8	9.8
D6R9P3;D6RD18;D6RBZ0;Q99729-3;Q99729-2;Q99729-4;Q99729	D6R9P3;D6RD18;D6RBZ0;Q99729-3;Q99729-2;Q99729-4;Q99729	4;4;4;4;4;3;3	4;4;4;4;4;3;3	4;4;4;4;4;3;3	Heterogeneous nuclear ribonucleoprotein A/B	HNRNPAB	>tr|D6R9P3|D6R9P3_HUMAN Heterogeneous nuclear ribonucleoprotein A/B OS=Homo sapiens GN=HNRNPAB PE=4 SV=1;>tr|D6RD18|D6RD18_HUMAN Heterogeneous nuclear ribonucleoprotein A/B OS=Homo sapiens GN=HNRNPAB PE=4 SV=1;>tr|D6RBZ0|D6RBZ0_HUMAN Heterogeneous nuclear	7	4	4	4	4	3	4	3	2	2	3	4	2	3	3	4	4	3	4	3	2	2	3	4	2	3	3	4	4	3	4	3	2	2	3	4	2	3	3	4	15.4	15.4
D6R9R1;D6RDF7;Q9HCC0-2;Q9HCC0	D6R9R1;D6RDF7;Q9HCC0-2;Q9HCC0	1;1;1;1	1;1;1;1	1;1;1;1	Methylcrotonoyl-CoA carboxylase beta chain, mitochondrial	MCCC2	>tr|D6R9R1|D6R9R1_HUMAN Methylcrotonoyl-CoA carboxylase beta chain, mitochondrial OS=Homo sapiens GN=MCCC2 PE=4 SV=2;>tr|D6RDF7|D6RDF7_HUMAN Methylcrotonoyl-CoA carboxylase beta chain, mitochondrial OS=Homo sapiens GN=MCCC2 PE=4 SV=2;>sp|Q9HCC0-2|MCCB_HUMA	4	1	1	1	1	1	1	1	1	1	0	1	0	1	1	1	1	1	1	1	1	1	0	1	0	1	1	1	1	1	1	1	1	1	0	1	0	1	1	1	2.7	2.7
D6RIZ4;D6RA47;D6RE79;Q14728;D6R9N3	D6RIZ4;D6RA47;D6RE79;Q14728;D6R9N3	2;2;2;2;1	2;2;2;2;1	2;2;2;2;1	Major facilitator superfamily domain-containing protein 10	MFSD10	>tr|D6RIZ4|D6RIZ4_HUMAN Major facilitator superfamily domain-containing protein 10 OS=Homo sapiens GN=MFSD10 PE=4 SV=1;>tr|D6RA47|D6RA47_HUMAN Major facilitator superfamily domain-containing protein 10 OS=Homo sapiens GN=MFSD10 PE=4 SV=1;>tr|D6RE79|D6RE79_	5	2	2	2	1	1	0	0	1	1	2	2	1	0	1	1	1	1	0	0	1	1	2	2	1	0	1	1	1	1	0	0	1	1	2	2	1	0	1	1	5.6	5.6
D6RBB5;Q99735	D6RBB5;Q99735	1;1	1;1	1;1	Microsomal glutathione S-transferase 2	MGST2	>tr|D6RBB5|D6RBB5_HUMAN Microsomal glutathione S-transferase 2 OS=Homo sapiens GN=MGST2 PE=4 SV=1;>sp|Q99735|MGST2_HUMAN Microsomal glutathione S-transferase 2 OS=Homo sapiens GN=MGST2 PE=1 SV=1	2	1	1	1	1	1	1	0	1	0	0	0	1	1	1	1	1	1	1	0	1	0	0	0	1	1	1	1	1	1	1	0	1	0	0	0	1	1	1	1	18.2	18.2
D6RBL5;P08758;E9PHT9;D6RBE9;E7ENQ5	D6RBL5;P08758;E9PHT9;D6RBE9;E7ENQ5	2;2;1;1;1	2;2;1;1;1	2;2;1;1;1	Annexin;Annexin A5	ANXA5	>tr|D6RBL5|D6RBL5_HUMAN Annexin OS=Homo sapiens GN=ANXA5 PE=3 SV=1;>sp|P08758|ANXA5_HUMAN Annexin A5 OS=Homo sapiens GN=ANXA5 PE=1 SV=2;>tr|E9PHT9|E9PHT9_HUMAN Annexin OS=Homo sapiens GN=ANXA5 PE=3 SV=1;>tr|D6RBE9|D6RBE9_HUMAN Annexin OS=Homo sapiens GN=AN	5	2	2	2	1	0	1	1	0	0	2	0	0	0	0	0	1	0	1	1	0	0	2	0	0	0	0	0	1	0	1	1	0	0	2	0	0	0	0	0	7.3	7.3
D6RBX6;Q99643-4;Q99643-3;Q99643-2;Q99643	D6RBX6;Q99643-4;Q99643-3;Q99643-2;Q99643	1;1;1;1;1	1;1;1;1;1	1;1;1;1;1	Succinate dehydrogenase cytochrome b560 subunit, mitochondrial	SDHC	>tr|D6RBX6|D6RBX6_HUMAN Succinate dehydrogenase cytochrome b560 subunit, mitochondrial OS=Homo sapiens GN=SDHC PE=4 SV=1;>sp|Q99643-4|C560_HUMAN Isoform 4 of Succinate dehydrogenase cytochrome b560 subunit, mitochondrial OS=Homo sapiens GN=SDHC;>sp|Q99643-	5	1	1	1	1	1	1	0	0	1	1	1	1	1	1	1	1	1	1	0	0	1	1	1	1	1	1	1	1	1	1	0	0	1	1	1	1	1	1	1	10.4	10.4
D6RC52;D6RCB9;Q9NX24;H0YC83	D6RC52;D6RCB9;Q9NX24;H0YC83	2;2;2;1	2;2;2;1	2;2;2;1	H/ACA ribonucleoprotein complex subunit 2	NHP2	>tr|D6RC52|D6RC52_HUMAN H/ACA ribonucleoprotein complex subunit 2 (Fragment) OS=Homo sapiens GN=NHP2 PE=4 SV=1;>tr|D6RCB9|D6RCB9_HUMAN H/ACA ribonucleoprotein complex subunit 2 (Fragment) OS=Homo sapiens GN=NHP2 PE=4 SV=1;>sp|Q9NX24|NHP2_HUMAN H/ACA ribonu	4	2	2	2	1	1	2	1	1	1	1	1	1	1	1	2	1	1	2	1	1	1	1	1	1	1	1	2	1	1	2	1	1	1	1	1	1	1	1	2	22	22
D6RCD0;Q8NBQ5	D6RCD0;Q8NBQ5	6;6	6;6	6;6	Estradiol 17-beta-dehydrogenase 11	HSD17B11	>tr|D6RCD0|D6RCD0_HUMAN Estradiol 17-beta-dehydrogenase 11 OS=Homo sapiens GN=HSD17B11 PE=4 SV=1;>sp|Q8NBQ5|DHB11_HUMAN Estradiol 17-beta-dehydrogenase 11 OS=Homo sapiens GN=HSD17B11 PE=1 SV=3	2	6	6	6	6	3	6	2	3	1	2	4	4	4	4	3	6	3	6	2	3	1	2	4	4	4	4	3	6	3	6	2	3	1	2	4	4	4	4	3	32.4	32.4
D6RDI3;Q9BVS4;H0Y919;H0Y8R4	D6RDI3;Q9BVS4	4;4;1;1	4;4;1;1	4;4;1;1	Serine/threonine-protein kinase RIO2	RIOK2	>tr|D6RDI3|D6RDI3_HUMAN Serine/threonine-protein kinase RIO2 OS=Homo sapiens GN=RIOK2 PE=4 SV=1;>sp|Q9BVS4|RIOK2_HUMAN Serine/threonine-protein kinase RIO2 OS=Homo sapiens GN=RIOK2 PE=1 SV=2	4	4	4	4	2	3	3	2	1	0	1	0	1	2	1	1	2	3	3	2	1	0	1	0	1	2	1	1	2	3	3	2	1	0	1	0	1	2	1	1	14.3	14.3
D6RDY6;H0YH39;G5E9Z8;O76094	D6RDY6;H0YH39;G5E9Z8;O76094	1;1;1;1	1;1;1;1	1;1;1;1	Signal recognition particle subunit SRP72	SRP72	>tr|D6RDY6|D6RDY6_HUMAN Signal recognition particle 72 kDa protein (Fragment) OS=Homo sapiens GN=SRP72 PE=4 SV=1;>tr|H0YH39|H0YH39_HUMAN Signal recognition particle 72 kDa protein OS=Homo sapiens GN=SRP72 PE=4 SV=1;>tr|G5E9Z8|G5E9Z8_HUMAN Signal recognitio	4	1	1	1	0	0	1	1	0	0	0	1	0	0	0	1	0	0	1	1	0	0	0	1	0	0	0	1	0	0	1	1	0	0	0	1	0	0	0	1	2.9	2.9
D6REB5;P35475;B3KWK6;H0Y9B3;D6R9D5;D6RBD5	D6REB5;P35475;B3KWK6;H0Y9B3	5;5;4;3;2;1	5;5;4;3;2;1	5;5;4;3;2;1	Alpha-L-iduronidase	IDUA	>tr|D6REB5|D6REB5_HUMAN Alpha-L-iduronidase OS=Homo sapiens GN=IDUA PE=4 SV=1;>sp|P35475|IDUA_HUMAN Alpha-L-iduronidase OS=Homo sapiens GN=IDUA PE=1 SV=2;>tr|B3KWK6|B3KWK6_HUMAN Alpha-L-iduronidase OS=Homo sapiens GN=IDUA PE=2 SV=1;>tr|H0Y9B3|H0Y9B3_HUMAN	6	5	5	5	1	1	1	1	3	4	4	4	3	4	4	3	1	1	1	1	3	4	4	4	3	4	4	3	1	1	1	1	3	4	4	4	3	4	4	3	10.2	10.2
D6REX3;O94979-3;H7C2W3;O94979-2;O94979;O94979-8;O94979-6;B7ZL00;O94979-4;D6RHZ5;H7BXG7;O94979-7;O94979-5;H0YAB3;H0Y9K1;H0Y8V7;H0Y9T9;H0Y8W8;D6RE64;D6RCQ9;H0YAF5;H0Y9V3	D6REX3;O94979-3;H7C2W3;O94979-2;O94979;O94979-8;O94979-6;B7ZL00;O94979-4;D6RHZ5;H7BXG7;O94979-7;O94979-5	24;24;24;24;24;24;23;23;23;19;18;18;13;11;8;8;5;5;2;2;2;1	24;24;24;24;24;24;23;23;23;19;18;18;13;11;8;8;5;5;2;2;2;1	24;24;24;24;24;24;23;23;23;19;18;18;13;11;8;8;5;5;2;2;2;1	Protein transport protein Sec31A	SEC31A	>tr|D6REX3|D6REX3_HUMAN Protein transport protein Sec31A OS=Homo sapiens GN=SEC31A PE=4 SV=1;>sp|O94979-3|SC31A_HUMAN Isoform 3 of Protein transport protein Sec31A OS=Homo sapiens GN=SEC31A;>tr|H7C2W3|H7C2W3_HUMAN Protein transport protein Sec31A OS=Homo s	22	24	24	24	14	12	21	17	20	15	18	16	12	9	7	11	14	12	21	17	20	15	18	16	12	9	7	11	14	12	21	17	20	15	18	16	12	9	7	11	20.8	20.8
D6RG39;D6RIT9;Q9NX40-3;Q9NX40-2;G8JLN7;Q9NX40;D6R918;D6RBC5;D6RDI5;D6RI08;D6RA54;D6RC55;D6RDK1;D6RIV2;D6R9T5;D6RDK6;D6RBN5	D6RG39;D6RIT9;Q9NX40-3;Q9NX40-2;G8JLN7;Q9NX40;D6R918;D6RBC5;D6RDI5;D6RI08;D6RA54;D6RC55;D6RDK1;D6RIV2;D6R9T5;D6RDK6;D6RBN5	2;2;2;2;2;2;1;1;1;1;1;1;1;1;1;1;1	2;2;2;2;2;2;1;1;1;1;1;1;1;1;1;1;1	2;2;2;2;2;2;1;1;1;1;1;1;1;1;1;1;1	OCIA domain-containing protein 1	OCIAD1	>tr|D6RG39|D6RG39_HUMAN OCIA domain-containing protein 1 (Fragment) OS=Homo sapiens GN=OCIAD1 PE=4 SV=1;>tr|D6RIT9|D6RIT9_HUMAN OCIA domain-containing protein 1 (Fragment) OS=Homo sapiens GN=OCIAD1 PE=4 SV=1;>sp|Q9NX40-3|OCAD1_HUMAN Isoform 3 of OCIA domai	17	2	2	2	1	0	1	0	1	1	0	1	2	1	2	1	1	0	1	0	1	1	0	1	2	1	2	1	1	0	1	0	1	1	0	1	2	1	2	1	17.5	17.5
D6RIC3;E7ERV7;E7ESQ0;Q9Y3C1;D6RGD3	D6RIC3;E7ERV7;E7ESQ0;Q9Y3C1;D6RGD3	2;2;2;2;2	2;2;2;2;2	2;2;2;2;2	Nucleolar protein 16	NOP16	>tr|D6RIC3|D6RIC3_HUMAN Nucleolar protein 16 OS=Homo sapiens GN=NOP16 PE=4 SV=1;>tr|E7ERV7|E7ERV7_HUMAN Nucleolar protein 16 OS=Homo sapiens GN=NOP16 PE=4 SV=1;>tr|E7ESQ0|E7ESQ0_HUMAN Nucleolar protein 16 OS=Homo sapiens GN=NOP16 PE=4 SV=2;>sp|Q9Y3C1|NOP16	5	2	2	2	1	0	1	0	0	0	0	0	2	1	2	2	1	0	1	0	0	0	0	0	2	1	2	2	1	0	1	0	0	0	0	0	2	1	2	2	19.3	19.3
D6RHW1;D6RIY1;D6RGK3;D6RIV9;D6RIE8;Q9HBM6;Q16594	D6RHW1;D6RIY1;D6RGK3;D6RIV9;D6RIE8;Q9HBM6;Q16594	3;3;3;3;3;3;3	3;3;3;3;3;3;3	3;3;3;3;3;3;3	Transcription initiation factor TFIID subunit 9B;Transcription initiation factor TFIID subunit 9	TAF9;AK6;TAF9B	>tr|D6RHW1|D6RHW1_HUMAN Transcription initiation factor TFIID subunit 9 (Fragment) OS=Homo sapiens GN=TAF9 PE=4 SV=1;>tr|D6RIY1|D6RIY1_HUMAN Transcription initiation factor TFIID subunit 9 (Fragment) OS=Homo sapiens GN=TAF9 PE=4 SV=1;>tr|D6RGK3|D6RGK3_HUMA	7	3	3	3	2	1	1	1	1	2	3	0	0	1	2	2	2	1	1	1	1	2	3	0	0	1	2	2	2	1	1	1	1	2	3	0	0	1	2	2	28.4	28.4
Q9NRP0;D6RH22	Q9NRP0;D6RH22	2;2	2;2	2;2	Oligosaccharyltransferase complex subunit OSTC	OSTC	>sp|Q9NRP0|OSTC_HUMAN Oligosaccharyltransferase complex subunit OSTC OS=Homo sapiens GN=OSTC PE=1 SV=1;>tr|D6RH22|D6RH22_HUMAN Oligosaccharyltransferase complex subunit OSTC OS=Homo sapiens GN=OSTC PE=4 SV=2	2	2	2	2	1	1	1	1	1	1	1	2	1	1	1	1	1	1	1	1	1	1	1	2	1	1	1	1	1	1	1	1	1	1	1	2	1	1	1	1	13.4	13.4
D6RIC4;Q96IU2	D6RIC4;Q96IU2	1;1	1;1	1;1	Zinc finger BED domain-containing protein 3	ZBED3	>tr|D6RIC4|D6RIC4_HUMAN Zinc finger BED domain-containing protein 3 (Fragment) OS=Homo sapiens GN=ZBED3 PE=4 SV=1;>sp|Q96IU2|ZBED3_HUMAN Zinc finger BED domain-containing protein 3 OS=Homo sapiens GN=ZBED3 PE=1 SV=1	2	1	1	1	1	1	1	1	1	1	0	1	0	0	0	0	1	1	1	1	1	1	0	1	0	0	0	0	1	1	1	1	1	1	0	1	0	0	0	0	8.7	8.7
H0Y4X3;E1P5S2;G3XAC6;Q14498-3;Q14498-2;Q14498;Q5QP23;Q5QP22;Q5QP21	H0Y4X3;E1P5S2;G3XAC6;Q14498-3;Q14498-2;Q14498;Q5QP23	4;4;4;4;4;4;2;1;1	4;4;4;4;4;4;2;1;1	4;4;4;4;4;4;2;1;1	RNA-binding protein 39	RBM39;RNPC2	>tr|H0Y4X3|H0Y4X3_HUMAN RNA-binding protein 39 (Fragment) OS=Homo sapiens GN=RBM39 PE=4 SV=1;>tr|E1P5S2|E1P5S2_HUMAN RNA-binding protein 39 OS=Homo sapiens GN=RBM39 PE=4 SV=1;>tr|G3XAC6|G3XAC6_HUMAN RNA-binding protein 39 OS=Homo sapiens GN=RBM39 PE=4 SV=1	9	4	4	4	2	3	3	4	1	1	4	3	3	2	2	4	2	3	3	4	1	1	4	3	3	2	2	4	2	3	3	4	1	1	4	3	3	2	2	4	15.7	15.7
E2QRH7;Q5TGH5;Q9NYP7;F6SH78	E2QRH7;Q5TGH5;Q9NYP7;F6SH78	1;1;1;1	1;1;1;1	1;1;1;1	Elongation of very long chain fatty acids protein;Elongation of very long chain fatty acids protein 5	ELOVL5	>tr|E2QRH7|E2QRH7_HUMAN Elongation of very long chain fatty acids protein 5 OS=Homo sapiens GN=ELOVL5 PE=4 SV=2;>tr|Q5TGH5|Q5TGH5_HUMAN ELOVL family member 5, elongation of long chain fatty acids (FEN1/Elo2, SUR4/Elo3-like, yeast), isoform CRA_e OS=Homo sa	4	1	1	1	1	0	0	0	0	0	0	1	0	1	1	1	1	0	0	0	0	0	0	1	0	1	1	1	1	0	0	0	0	0	0	1	0	1	1	1	4.5	4.5
E3W978;F8WCW5;O75330-4;O75330-2;O75330;O75330-3	E3W978;F8WCW5;O75330-4;O75330-2;O75330;O75330-3	3;3;3;3;3;3	3;3;3;3;3;3	3;3;3;3;3;3	Hyaluronan mediated motility receptor	HMMR	>tr|E3W978|E3W978_HUMAN Hyaluronan mediated motility receptor OS=Homo sapiens GN=HMMR PE=4 SV=2;>tr|F8WCW5|F8WCW5_HUMAN Hyaluronan mediated motility receptor OS=Homo sapiens GN=HMMR PE=4 SV=1;>sp|O75330-4|HMMR_HUMAN Isoform 4 of Hyaluronan mediated motilit	6	3	3	3	2	1	2	2	1	1	1	1	0	0	0	0	2	1	2	2	1	1	1	1	0	0	0	0	2	1	2	2	1	1	1	1	0	0	0	0	8.2	8.2
G5E954;E5RFK5;P24863;E5RIH8;Q5JV82;E5RFX8;E5RI39;H0YBQ5;P24863-2;E5RHL8	G5E954;E5RFK5;P24863;E5RIH8;Q5JV82;E5RFX8;E5RI39;H0YBQ5;P24863-2	3;3;3;2;2;2;2;2;2;1	3;3;3;2;2;2;2;2;2;1	3;3;3;2;2;2;2;2;2;1	Cyclin-C	CCNC	>tr|G5E954|G5E954_HUMAN Cyclin C, isoform CRA_c OS=Homo sapiens GN=CCNC PE=3 SV=1;>tr|E5RFK5|E5RFK5_HUMAN Cyclin-C OS=Homo sapiens GN=CCNC PE=3 SV=1;>sp|P24863|CCNC_HUMAN Cyclin-C OS=Homo sapiens GN=CCNC PE=1 SV=2;>tr|E5RIH8|E5RIH8_HUMAN Cyclin-C OS=Homo s	10	3	3	3	2	1	3	1	2	1	1	2	2	1	1	1	2	1	3	1	2	1	1	2	2	1	1	1	2	1	3	1	2	1	1	2	2	1	1	1	21.3	21.3
E5RGF0;Q92820	E5RGF0;Q92820	1;1	1;1	1;1	Gamma-glutamyl hydrolase	GGH	>tr|E5RGF0|E5RGF0_HUMAN Gamma-glutamyl hydrolase (Fragment) OS=Homo sapiens GN=GGH PE=4 SV=1;>sp|Q92820|GGH_HUMAN Gamma-glutamyl hydrolase OS=Homo sapiens GN=GGH PE=1 SV=2	2	1	1	1	1	1	0	0	0	0	1	0	0	0	1	0	1	1	0	0	0	0	1	0	0	0	1	0	1	1	0	0	0	0	1	0	0	0	1	0	8	8
E5RHG8;Q15369;E5RGD9;E5RJ89	E5RHG8;Q15369;E5RGD9;E5RJ89	5;5;4;3	5;5;4;3	5;5;4;3	Transcription elongation factor B polypeptide 1	TCEB1	>tr|E5RHG8|E5RHG8_HUMAN Transcription elongation factor B polypeptide 1 (Fragment) OS=Homo sapiens GN=TCEB1 PE=4 SV=1;>sp|Q15369|ELOC_HUMAN Transcription elongation factor B polypeptide 1 OS=Homo sapiens GN=TCEB1 PE=1 SV=1;>tr|E5RGD9|E5RGD9_HUMAN Transcrip	4	5	5	5	5	5	5	5	5	5	5	5	5	5	5	5	5	5	5	5	5	5	5	5	5	5	5	5	5	5	5	5	5	5	5	5	5	5	5	5	62.9	62.9
E5RI99;P62888;E5RJH3	E5RI99;P62888	6;6;1	6;6;1	6;6;1	60S ribosomal protein L30	RPL30	>tr|E5RI99|E5RI99_HUMAN 60S ribosomal protein L30 (Fragment) OS=Homo sapiens GN=RPL30 PE=3 SV=1;>sp|P62888|RL30_HUMAN 60S ribosomal protein L30 OS=Homo sapiens GN=RPL30 PE=1 SV=2	3	6	6	6	5	6	5	5	4	4	4	5	5	5	5	5	5	6	5	5	4	4	4	5	5	5	5	5	5	6	5	5	4	4	4	5	5	5	5	5	51.8	51.8
E5RJR5;P63208;E7ERH2;F8W8N3;P63208-2;E5RGM3	E5RJR5;P63208;E7ERH2;F8W8N3;P63208-2;E5RGM3	4;4;3;3;3;2	4;4;3;3;3;2	4;4;3;3;3;2	S-phase kinase-associated protein 1	SKP1	>tr|E5RJR5|E5RJR5_HUMAN S-phase kinase-associated protein 1 OS=Homo sapiens GN=SKP1 PE=4 SV=1;>sp|P63208|SKP1_HUMAN S-phase kinase-associated protein 1 OS=Homo sapiens GN=SKP1 PE=1 SV=2;>tr|E7ERH2|E7ERH2_HUMAN S-phase kinase-associated protein 1 (Fragment)	6	4	4	4	3	2	3	2	3	4	3	3	1	2	3	3	3	2	3	2	3	4	3	3	1	2	3	3	3	2	3	2	3	4	3	3	1	2	3	3	20.9	20.9
P51398-2;E7EM60;P51398	P51398-2;E7EM60;P51398	1;1;1	1;1;1	1;1;1	28S ribosomal protein S29, mitochondrial	DAP3	>sp|P51398-2|RT29_HUMAN Isoform 2 of 28S ribosomal protein S29, mitochondrial OS=Homo sapiens GN=DAP3;>tr|E7EM60|E7EM60_HUMAN 28S ribosomal protein S29, mitochondrial OS=Homo sapiens GN=DAP3 PE=4 SV=1;>sp|P51398|RT29_HUMAN 28S ribosomal protein S29, mitoch	3	1	1	1	1	1	1	0	1	1	1	1	1	1	1	1	1	1	1	0	1	1	1	1	1	1	1	1	1	1	1	0	1	1	1	1	1	1	1	1	3.9	3.9
E9PN08;E7EM95;Q99942	E9PN08;E7EM95;Q99942	1;1;1	1;1;1	1;1;1	E3 ubiquitin-protein ligase RNF5	RNF5	>tr|E9PN08|E9PN08_HUMAN E3 ubiquitin-protein ligase RNF5 OS=Homo sapiens GN=RNF5 PE=4 SV=1;>tr|E7EM95|E7EM95_HUMAN E3 ubiquitin-protein ligase RNF5 OS=Homo sapiens GN=RNF5 PE=4 SV=1;>sp|Q99942|RNF5_HUMAN E3 ubiquitin-protein ligase RNF5 OS=Homo sapiens GN=	3	1	1	1	1	0	0	0	0	0	0	0	0	1	0	0	1	0	0	0	0	0	0	0	0	1	0	0	1	0	0	0	0	0	0	0	0	1	0	0	16.5	16.5
E7EMA8;P15259;P18669	E7EMA8;P15259;P18669	1;1;1	1;1;1	1;1;1	Phosphoglycerate mutase 2;Phosphoglycerate mutase 1	PGAM2;PGAM1	>tr|E7EMA8|E7EMA8_HUMAN Phosphoglycerate mutase 1 OS=Homo sapiens GN=PGAM1 PE=3 SV=2;>sp|P15259|PGAM2_HUMAN Phosphoglycerate mutase 2 OS=Homo sapiens GN=PGAM2 PE=1 SV=3;>sp|P18669|PGAM1_HUMAN Phosphoglycerate mutase 1 OS=Homo sapiens GN=PGAM1 PE=1 SV=2	3	1	1	1	1	1	1	0	0	0	1	1	0	1	1	0	1	1	1	0	0	0	1	1	0	1	1	0	1	1	1	0	0	0	1	1	0	1	1	0	7.6	7.6
H0Y2N2;Q9NRR4-2;E7EMP9;Q9NRR4;H7BYF6;Q9NRR4-3;H7C5U6	H0Y2N2;Q9NRR4-2;E7EMP9;Q9NRR4;H7BYF6;Q9NRR4-3	22;22;22;22;18;18;3	22;22;22;22;18;18;3	22;22;22;22;18;18;3	Ribonuclease 3	DROSHA	>tr|H0Y2N2|H0Y2N2_HUMAN Ribonuclease 3 OS=Homo sapiens GN=DROSHA PE=4 SV=1;>sp|Q9NRR4-2|RNC_HUMAN Isoform 2 of Ribonuclease 3 OS=Homo sapiens GN=DROSHA;>tr|E7EMP9|E7EMP9_HUMAN Ribonuclease 3 OS=Homo sapiens GN=DROSHA PE=4 SV=1;>sp|Q9NRR4|RNC_HUMAN Ribonucl	7	22	22	22	21	16	19	17	13	15	14	17	10	16	19	17	21	16	19	17	13	15	14	17	10	16	19	17	21	16	19	17	13	15	14	17	10	16	19	17	24.4	24.4
E7EN05;Q16762	E7EN05;Q16762	2;2	2;2	2;2	Thiosulfate sulfurtransferase	TST	>tr|E7EN05|E7EN05_HUMAN Sulfurtransferase OS=Homo sapiens GN=TST PE=4 SV=1;>sp|Q16762|THTR_HUMAN Thiosulfate sulfurtransferase OS=Homo sapiens GN=TST PE=1 SV=4	2	2	2	2	1	1	1	1	1	2	1	2	1	2	1	1	1	1	1	1	1	2	1	2	1	2	1	1	1	1	1	1	1	2	1	2	1	2	1	1	13.1	13.1
E9PGW7;Q5T8T7;E7EN96;Q5T8T8;Q15528-2;Q15528	E9PGW7;Q5T8T7;E7EN96;Q5T8T8;Q15528-2;Q15528	2;2;2;2;2;2	2;2;2;2;2;2	2;2;2;2;2;2	Mediator of RNA polymerase II transcription subunit 22	MED22	>tr|E9PGW7|E9PGW7_HUMAN Mediator of RNA polymerase II transcription subunit 22 (Fragment) OS=Homo sapiens GN=MED22 PE=4 SV=1;>tr|Q5T8T7|Q5T8T7_HUMAN Mediator complex subunit 22 OS=Homo sapiens GN=MED22 PE=2 SV=1;>tr|E7EN96|E7EN96_HUMAN Mediator of RNA poly	6	2	2	2	1	2	1	1	1	2	2	1	1	2	2	1	1	2	1	1	1	2	2	1	1	2	2	1	1	2	1	1	1	2	2	1	1	2	2	1	21.6	21.6
H0Y6T7;E9PC09;E7ENA9;Q92542-2;Q92542;Q5T205;H0Y3Z4;F6Y097	H0Y6T7;E9PC09;E7ENA9;Q92542-2;Q92542;Q5T205;H0Y3Z4;F6Y097	2;2;2;2;2;1;1;1	2;2;2;2;2;1;1;1	2;2;2;2;2;1;1;1	Nicastrin	NCSTN	>tr|H0Y6T7|H0Y6T7_HUMAN Nicastrin (Fragment) OS=Homo sapiens GN=NCSTN PE=4 SV=1;>tr|E9PC09|E9PC09_HUMAN Nicastrin OS=Homo sapiens GN=NCSTN PE=4 SV=1;>tr|E7ENA9|E7ENA9_HUMAN Nicastrin OS=Homo sapiens GN=NCSTN PE=4 SV=2;>sp|Q92542-2|NICA_HUMAN Isoform 2 of N	8	2	2	2	1	0	2	0	0	1	1	1	0	1	0	1	1	0	2	0	0	1	1	1	0	1	0	1	1	0	2	0	0	1	1	1	0	1	0	1	7.3	7.3
E7ENN3;E9PEL9;Q8NF91-4;Q8NF91;E7EQI5;Q5JV20;F8WAI0;F5GXQ9;H0Y326;H0Y325;Q8NF91-9;Q8NF91-3;Q8NF91-8;Q8NF91-2;Q8NF91-7	E7ENN3;E9PEL9;Q8NF91-4;Q8NF91;E7EQI5;Q5JV20;F8WAI0;F5GXQ9;H0Y326;H0Y325;Q8NF91-9;Q8NF91-3;Q8NF91-8;Q8NF91-2	4;4;4;4;4;3;3;3;3;3;3;3;3;3;1	4;4;4;4;4;3;3;3;3;3;3;3;3;3;1	4;4;4;4;4;3;3;3;3;3;3;3;3;3;1	Nesprin-1	SYNE1	>tr|E7ENN3|E7ENN3_HUMAN Nesprin-1 OS=Homo sapiens GN=SYNE1 PE=4 SV=1;>tr|E9PEL9|E9PEL9_HUMAN Nesprin-1 OS=Homo sapiens GN=SYNE1 PE=4 SV=1;>sp|Q8NF91-4|SYNE1_HUMAN Isoform 4 of Nesprin-1 OS=Homo sapiens GN=SYNE1;>sp|Q8NF91|SYNE1_HUMAN Nesprin-1 OS=Homo sapi	15	4	4	4	3	2	1	2	2	2	2	3	3	2	2	3	3	2	1	2	2	2	2	3	3	2	2	3	3	2	1	2	2	2	2	3	3	2	2	3	0.7	0.7
H0YCK3;E7ENU4;P55265-5;P55265-3;P55265-2;P55265;P55265-4	H0YCK3;E7ENU4;P55265-5;P55265-3;P55265-2;P55265;P55265-4	2;2;2;2;2;2;2	2;2;2;2;2;2;2	2;2;2;2;2;2;2	Double-stranded RNA-specific adenosine deaminase	ADAR	>tr|H0YCK3|H0YCK3_HUMAN Double-stranded RNA-specific adenosine deaminase (Fragment) OS=Homo sapiens GN=ADAR PE=4 SV=1;>tr|E7ENU4|E7ENU4_HUMAN Double-stranded RNA-specific adenosine deaminase OS=Homo sapiens GN=ADAR PE=4 SV=1;>sp|P55265-5|DSRAD_HUMAN Isofor	7	2	2	2	1	2	1	2	1	1	1	2	2	1	1	2	1	2	1	2	1	1	1	2	2	1	1	2	1	2	1	2	1	1	1	2	2	1	1	2	1.9	1.9
E7ENW2;Q13191;B5MC15;Q13191-3;Q13191-2;E9PHA9;Q68CY2;Q13191-4	E7ENW2;Q13191;B5MC15;Q13191-3;Q13191-2	5;5;3;3;3;2;2;1	4;4;2;2;2;2;2;1	4;4;2;2;2;2;2;1	E3 ubiquitin-protein ligase CBL-B	CBLB	>tr|E7ENW2|E7ENW2_HUMAN E3 ubiquitin-protein ligase CBL-B OS=Homo sapiens GN=CBLB PE=4 SV=1;>sp|Q13191|CBLB_HUMAN E3 ubiquitin-protein ligase CBL-B OS=Homo sapiens GN=CBLB PE=1 SV=2;>tr|B5MC15|B5MC15_HUMAN Cas-Br-M (Murine) ecotropic retroviral transformin	8	5	4	4	1	1	3	1	3	2	2	4	2	1	1	1	0	0	2	0	2	1	1	3	1	0	0	0	0	0	2	0	2	1	1	3	1	0	0	0	6	5.2
H0Y671;H0Y5E5;E7EQX5;E7ENZ6;P30481;P30483;H0Y5W5;F6T5B9;F6RI39;Q95365;Q29940;Q29836;Q29718;Q04826;P30685;P30495;P30493;P30492;P30491;P30488;P30487;P30485;P30484;P30475;P30464;P30461;P18465;P18463;P10319;P03989;F5H017;H0Y805;E9PLX5;E9PIJ3;H0Y7W0;H0Y7Q7;H0Y5Q6;H0Y5J2;H0Y4C2;H0Y7D1;H0Y4I7;F8VVT3;B4DUK6;F8VTQ8;B7Z760;F6RUR5;F6R3U9;B4DT81;D0EV57;Q6ZUW0;F8W0J9;E7EWC3;E7EQP4;E7EN49;Q5SPT7;P30498;P30490;…	H0Y671;H0Y5E5;E7EQX5;E7ENZ6;P30481;P30483;H0Y5W5;F6T5B9;F6RI39;Q95365;Q29940;Q29836;Q29718;Q04826;P30685;P30495;P30493;P30492;P30491;P30488;P30487;P30485;P30484;P30475;P30464;P30461;P18465;P18463;P10319;P03989	5;5;5;5;5;4;3;3;3;3;3;3;3;3;3;3;3;3;3;3;3;3;3;3;3;3;3;3;3;3;2;2;2;2;2;2;2;2;2;2;2;2;2;2;2;2;2;2;2;2;2;2;2;2;2;2;2;2;2;2;2;2;2;2;2;1;1;1;1;1;1;1;1;1;1;1;1;1;1;1;1;1;1;1	5;5;5;5;5;4;3;3;3;3;3;3;3;3;3;3;3;3;3;3;3;3;3;3;3;3;3;3;3;3;2;2;2;2;2;2;2;2;2;2;2;2;2;2;2;2;2;2;2;2;2;2;2;2;2;2;2;2;2;2;2;2;2;2;2;1;1;1;1;1;1;1;1;1;1;1;1;1;1;1;1;1;1;1	3;3;3;3;3;2;1;2;2;1;1;1;1;1;1;1;1;1;1;1;1;1;1;1;1;1;1;1;1;1;1;0;1;1;0;0;0;0;0;1;1;1;1;0;0;0;0;0;0;0;0;0;0;0;0;1;1;1;1;1;1;1;1;1;0;0;0;0;0;0;0;0;0;0;0;0;0;0;0;0;0;1;1;0	HLA class I histocompatibility antigen, B-44 alpha chain;HLA class I histocompatibility antigen, B-45 alpha chain;HLA class I histocompatibility antigen, B-38 alpha chain;HLA class I histocompatibility antigen, B-59 alpha chain;HLA class I histocompatibility antigen, B-67 alpha chain;HLA class I histocompatibility antigen, B-82 alpha chain;HLA class I histocompatibility antigen, B-40 alpha chain;…	HLA-B	>tr|H0Y671|H0Y671_HUMAN HLA class I histocompatibility antigen, B-82 alpha chain (Fragment) OS=Homo sapiens GN=HLA-B PE=3 SV=1;>tr|H0Y5E5|H0Y5E5_HUMAN HLA class I histocompatibility antigen, B-82 alpha chain (Fragment) OS=Homo sapiens GN=HLA-B PE=3 SV=1;>t	84	5	5	3	3	3	3	2	1	3	2	3	3	5	3	5	3	3	3	2	1	3	2	3	3	5	3	5	1	1	3	2	0	1	1	2	1	3	2	3	30.3	30.3
H0Y3W2;E7EP17;Q9NYC9-2;Q9NYC9;Q9P225-2;Q9P225;Q96DT5	H0Y3W2;E7EP17;Q9NYC9-2;Q9NYC9;Q9P225-2;Q9P225;Q96DT5	2;2;2;2;1;1;1	2;2;2;2;1;1;1	2;2;2;2;1;1;1	Dynein heavy chain 9, axonemal;Dynein heavy chain 2, axonemal;Dynein heavy chain 11, axonemal	DNAH9;DNAH2;DNAH11	>tr|H0Y3W2|H0Y3W2_HUMAN Dynein heavy chain 9, axonemal (Fragment) OS=Homo sapiens GN=DNAH9 PE=4 SV=1;>tr|E7EP17|E7EP17_HUMAN Dynein heavy chain 9, axonemal OS=Homo sapiens GN=DNAH9 PE=4 SV=1;>sp|Q9NYC9-2|DYH9_HUMAN Isoform 2 of Dynein heavy chain 9, axonem	7	2	2	2	1	1	1	0	1	1	1	2	1	1	1	1	1	1	1	0	1	1	1	2	1	1	1	1	1	1	1	0	1	1	1	2	1	1	1	1	0.7	0.7
E7EP36	E7EP36	1	1	1			>tr|E7EP36|E7EP36_HUMAN E3 ubiquitin-protein ligase RNF220 OS=Homo sapiens GN=RNF220 PE=4 SV=2	1	1	1	1	1	1	1	1	1	1	1	1	1	1	1	1	1	1	1	1	1	1	1	1	1	1	1	1	1	1	1	1	1	1	1	1	1	1	1	1	10.9	10.9
E7EPD5;P57073;P48436;A6PVD3;B4DV62;P35713;Q9H6I2;P56693	E7EPD5;P57073;P48436;A6PVD3;B4DV62;P35713;Q9H6I2;P56693	2;2;2;1;1;1;1;1	2;2;2;1;1;1;1;1	2;2;2;1;1;1;1;1	Transcription factor SOX-8;Transcription factor SOX-9;Transcription factor SOX-10;Transcription factor SOX-18;Transcription factor SOX-17	SOX8;SOX9;SOX10;SOX18;SOX17	>tr|E7EPD5|E7EPD5_HUMAN Transcription factor SOX-9 OS=Homo sapiens GN=SOX9 PE=4 SV=1;>sp|P57073|SOX8_HUMAN Transcription factor SOX-8 OS=Homo sapiens GN=SOX8 PE=2 SV=1;>sp|P48436|SOX9_HUMAN Transcription factor SOX-9 OS=Homo sapiens GN=SOX9 PE=1 SV=1;>tr|A	8	2	2	2	0	2	0	1	2	2	2	1	2	2	2	1	0	2	0	1	2	2	2	1	2	2	2	1	0	2	0	1	2	2	2	1	2	2	2	1	5.6	5.6
E7EPG7;Q9Y261;Q9Y261-2	E7EPG7;Q9Y261;Q9Y261-2	1;1;1	1;1;1	1;1;1	Hepatocyte nuclear factor 3-beta	FOXA2	>tr|E7EPG7|E7EPG7_HUMAN Hepatocyte nuclear factor 3-beta OS=Homo sapiens GN=FOXA2 PE=4 SV=2;>sp|Q9Y261|FOXA2_HUMAN Hepatocyte nuclear factor 3-beta OS=Homo sapiens GN=FOXA2 PE=1 SV=1;>sp|Q9Y261-2|FOXA2_HUMAN Isoform 2 of Hepatocyte nuclear factor 3-beta OS	3	1	1	1	1	1	1	1	0	0	0	0	0	0	0	0	1	1	1	1	0	0	0	0	0	0	0	0	1	1	1	1	0	0	0	0	0	0	0	0	12	12
E7ETK0;P62847-2;P62847-3;P62847;E7EPK6	E7ETK0;P62847-2;P62847-3;P62847;E7EPK6	5;5;5;5;5	5;5;5;5;5	5;5;5;5;5	40S ribosomal protein S24	RPS24	>tr|E7ETK0|E7ETK0_HUMAN 40S ribosomal protein S24 OS=Homo sapiens GN=RPS24 PE=3 SV=1;>sp|P62847-2|RS24_HUMAN Isoform 2 of 40S ribosomal protein S24 OS=Homo sapiens GN=RPS24;>sp|P62847-3|RS24_HUMAN Isoform 3 of 40S ribosomal protein S24 OS=Homo sapiens GN=R	5	5	5	5	5	5	5	4	5	5	5	5	5	5	4	5	5	5	5	4	5	5	5	5	5	5	4	5	5	5	5	4	5	5	5	5	5	5	4	5	35.9	35.9
E7EQ04;Q7L576;F5H583;E7EVJ5;E7EVF4;E7EWA4;Q96F07-2;Q96F07;H0YL50;Q7L576-3;Q7L576-2;H7C229;E7EW33;H0YLJ5;H0YL39	E7EQ04;Q7L576;F5H583;E7EVJ5;E7EVF4;E7EWA4;Q96F07-2;Q96F07;H0YL50;Q7L576-3;Q7L576-2	5;5;4;4;4;4;4;4;3;3;3;2;2;1;1	5;5;4;4;4;4;4;4;3;3;3;2;2;1;1	5;5;4;4;4;4;4;4;3;3;3;2;2;1;1	Cytoplasmic FMR1-interacting protein 1;Cytoplasmic FMR1-interacting protein 2	CYFIP1;CYFIP2	>tr|E7EQ04|E7EQ04_HUMAN Cytoplasmic FMR1-interacting protein 1 OS=Homo sapiens GN=CYFIP1 PE=4 SV=1;>sp|Q7L576|CYFP1_HUMAN Cytoplasmic FMR1-interacting protein 1 OS=Homo sapiens GN=CYFIP1 PE=1 SV=1;>tr|F5H583|F5H583_HUMAN Cytoplasmic FMR1-interacting protei	15	5	5	5	0	0	3	1	1	0	0	2	0	1	1	1	0	0	3	1	1	0	0	2	0	1	1	1	0	0	3	1	1	0	0	2	0	1	1	1	4.4	4.4
E7EQ34;O14653;O14653-2;I3L4Z6;O14653-3;I3L0K1;I3L1K7;I3L3V4;I3NI02	E7EQ34;O14653;O14653-2;I3L4Z6;O14653-3;I3L0K1;I3L1K7;I3L3V4	11;11;11;9;9;8;7;7;2	11;11;11;9;9;8;7;7;2	11;11;11;9;9;8;7;7;2	Golgi SNAP receptor complex member 2	GOSR2	>tr|E7EQ34|E7EQ34_HUMAN Golgi SNAP receptor complex member 2 OS=Homo sapiens GN=GOSR2 PE=4 SV=2;>sp|O14653|GOSR2_HUMAN Golgi SNAP receptor complex member 2 OS=Homo sapiens GN=GOSR2 PE=1 SV=2;>sp|O14653-2|GOSR2_HUMAN Isoform B of Golgi SNAP receptor complex	9	11	11	11	10	7	8	10	10	7	9	10	10	8	8	9	10	7	8	10	10	7	9	10	10	8	8	9	10	7	8	10	10	7	9	10	10	8	8	9	58.6	58.6
E7EQN6;Q9GZR1-2;Q9GZR1;F8W6D9;H0Y4F4;D6RG09;F5GZW5;B3KMM0;H0Y8Y8;D6RJH1	E7EQN6;Q9GZR1-2;Q9GZR1;F8W6D9;H0Y4F4	23;23;23;18;15;9;9;6;6;1	23;23;23;18;15;9;9;6;6;1	23;23;23;18;15;9;9;6;6;1	Sentrin-specific protease 6	SENP6	>tr|E7EQN6|E7EQN6_HUMAN Sentrin-specific protease 6 OS=Homo sapiens GN=SENP6 PE=4 SV=1;>sp|Q9GZR1-2|SENP6_HUMAN Isoform 2 of Sentrin-specific protease 6 OS=Homo sapiens GN=SENP6;>sp|Q9GZR1|SENP6_HUMAN Sentrin-specific protease 6 OS=Homo sapiens GN=SENP6 PE	10	23	23	23	14	13	18	10	18	17	18	18	16	10	9	12	14	13	18	10	18	17	18	18	16	10	9	12	14	13	18	10	18	17	18	18	16	10	9	12	24.7	24.7
F8W9Q9;E7EQP8;Q96PV6;Q96PV6-2	F8W9Q9;E7EQP8;Q96PV6;Q96PV6-2	1;1;1;1	1;1;1;1	1;1;1;1	Leukocyte receptor cluster member 8	LENG8	>tr|F8W9Q9|F8W9Q9_HUMAN Leukocyte receptor cluster member 8 OS=Homo sapiens GN=LENG8 PE=4 SV=1;>tr|E7EQP8|E7EQP8_HUMAN Leukocyte receptor cluster member 8 OS=Homo sapiens GN=LENG8 PE=4 SV=1;>sp|Q96PV6|LENG8_HUMAN Leukocyte receptor cluster member 8 OS=Homo	4	1	1	1	0	0	0	0	0	0	0	0	0	0	0	1	0	0	0	0	0	0	0	0	0	0	0	1	0	0	0	0	0	0	0	0	0	0	0	1	1.7	1.7
E7EQR4;P15311;H7BZI4;F5H1A7;P35241;A7YIJ8	E7EQR4;P15311;H7BZI4;F5H1A7;P35241;A7YIJ8	9;9;6;6;6;6	3;3;0;0;0;0	3;3;0;0;0;0	Ezrin;Radixin	EZR;RDX	>tr|E7EQR4|E7EQR4_HUMAN Ezrin OS=Homo sapiens GN=EZR PE=4 SV=2;>sp|P15311|EZRI_HUMAN Ezrin OS=Homo sapiens GN=EZR PE=1 SV=4;>tr|H7BZI4|H7BZI4_HUMAN Radixin OS=Homo sapiens GN=RDX PE=4 SV=1;>tr|F5H1A7|F5H1A7_HUMAN Radixin OS=Homo sapiens GN=RDX PE=4 SV=1;>s	6	9	3	3	6	5	7	7	3	4	4	7	5	7	6	6	2	2	2	1	0	0	0	1	0	1	1	1	2	2	2	1	0	0	0	1	0	1	1	1	13	5.8
E7EQS8;Q6N021;E7EPB1;Q6N021-2;Q6N021-3;F5H3K4;D6RE87	E7EQS8;Q6N021;E7EPB1;Q6N021-2;Q6N021-3	27;27;18;18;18;5;1	27;27;18;18;18;5;1	27;27;18;18;18;5;1	Methylcytosine dioxygenase TET2	TET2	>tr|E7EQS8|E7EQS8_HUMAN Methylcytosine dioxygenase TET2 OS=Homo sapiens GN=TET2 PE=4 SV=1;>sp|Q6N021|TET2_HUMAN Methylcytosine dioxygenase TET2 OS=Homo sapiens GN=TET2 PE=1 SV=3;>tr|E7EPB1|E7EPB1_HUMAN Methylcytosine dioxygenase TET2 OS=Homo sapiens GN=TET	7	27	27	27	19	15	19	19	13	15	13	20	14	15	16	17	19	15	19	19	13	15	13	20	14	15	16	17	19	15	19	19	13	15	13	20	14	15	16	17	20.1	20.1
E7EQV9;P61313;E7ENU7;E7EX53;Q642I1;E7ERA2	E7EQV9;P61313;E7ENU7;E7EX53;Q642I1	8;8;7;5;4;1	8;8;7;5;4;1	8;8;7;5;4;1	Ribosomal protein L15;60S ribosomal protein L15	RPL15	>tr|E7EQV9|E7EQV9_HUMAN Ribosomal protein L15 (Fragment) OS=Homo sapiens GN=RPL15 PE=3 SV=1;>sp|P61313|RL15_HUMAN 60S ribosomal protein L15 OS=Homo sapiens GN=RPL15 PE=1 SV=2;>tr|E7ENU7|E7ENU7_HUMAN Ribosomal protein L15 (Fragment) OS=Homo sapiens GN=RPL15	6	8	8	8	6	2	6	3	7	4	6	5	6	4	3	3	6	2	6	3	7	4	6	5	6	4	3	3	6	2	6	3	7	4	6	5	6	4	3	3	45.4	45.4
E7EQW9	E7EQW9	65	65	1	Protein LAP2	ERBB2IP	>tr|E7EQW9|E7EQW9_HUMAN Protein LAP2 OS=Homo sapiens GN=ERBB2IP PE=4 SV=1	1	65	65	1	51	53	53	50	51	51	51	54	55	55	51	56	51	53	53	50	51	51	51	54	55	55	51	56	1	1	1	0	1	1	0	0	1	0	0	1	59.7	59.7
E7EUP3;G3V125;O95251-3;E7ER15;O95251-2;G5E9K7;O95251	E7EUP3;G3V125;O95251-3;E7ER15;O95251-2;G5E9K7;O95251	4;4;4;4;4;4;4	3;3;3;3;3;3;3	3;3;3;3;3;3;3	Histone acetyltransferase KAT7	KAT7	>tr|E7EUP3|E7EUP3_HUMAN Histone acetyltransferase KAT7 OS=Homo sapiens GN=KAT7 PE=4 SV=1;>tr|G3V125|G3V125_HUMAN Histone acetyltransferase KAT7 OS=Homo sapiens GN=KAT7 PE=4 SV=1;>sp|O95251-3|KAT7_HUMAN Isoform 3 of Histone acetyltransferase KAT7 OS=Homo sa	7	4	3	3	2	2	1	1	2	3	1	4	1	3	1	2	1	1	0	0	1	2	0	3	0	2	0	1	1	1	0	0	1	2	0	3	0	2	0	1	12.2	9.6
H0Y373;E7ER89;O95340;O95340-2	H0Y373;E7ER89;O95340;O95340-2	1;1;1;1	1;1;1;1	1;1;1;1	Bifunctional 3-phosphoadenosine 5-phosphosulfate synthase 2;Sulfate adenylyltransferase;Adenylyl-sulfate kinase	PAPSS2	>tr|H0Y373|H0Y373_HUMAN Bifunctional 3-phosphoadenosine 5-phosphosulfate synthase 2 OS=Homo sapiens GN=PAPSS2 PE=3 SV=1;>tr|E7ER89|E7ER89_HUMAN Bifunctional 3-phosphoadenosine 5-phosphosulfate synthase 2 OS=Homo sapiens GN=PAPSS2 PE=3 SV=2;>sp|O95340|P	4	1	1	1	0	0	1	0	1	1	1	1	0	0	0	0	0	0	1	0	1	1	1	1	0	0	0	0	0	0	1	0	1	1	1	1	0	0	0	0	2.8	2.8
E7ERH1;E7EMG1;Q6IPI5;C9J8K5	E7ERH1;E7EMG1;Q6IPI5	14;8;8;1	1;1;1;1	1;1;1;1	Tensin-1	TNS1	>tr|E7ERH1|E7ERH1_HUMAN Tensin-1 (Fragment) OS=Homo sapiens GN=TNS1 PE=4 SV=1;>tr|E7EMG1|E7EMG1_HUMAN Tensin-1 OS=Homo sapiens GN=TNS1 PE=4 SV=1;>tr|Q6IPI5|Q6IPI5_HUMAN TNS1 protein OS=Homo sapiens GN=TNS1 PE=2 SV=1	4	14	1	1	11	9	13	11	11	8	9	11	10	12	5	10	1	1	1	1	1	1	1	1	1	1	1	1	1	1	1	1	1	1	1	1	1	1	1	1	29.2	1.7
E7ERL0;Q32Q12;P22392;P15531;P15531-2;P22392-2;C9K028;F6XY72;E5RHP0;O60361	E7ERL0;Q32Q12;P22392;P15531;P15531-2;P22392-2;C9K028;F6XY72;E5RHP0;O60361	2;2;2;2;2;2;1;1;1;1	2;2;2;2;2;2;1;1;1;1	2;2;2;2;2;2;1;1;1;1	Nucleoside diphosphate kinase;Nucleoside diphosphate kinase B;Nucleoside diphosphate kinase A;Putative nucleoside diphosphate kinase	NME1;NME1-NME2;NME2;NME2P1	>tr|E7ERL0|E7ERL0_HUMAN Nucleoside diphosphate kinase A OS=Homo sapiens GN=NME1 PE=3 SV=1;>tr|Q32Q12|Q32Q12_HUMAN Nucleoside diphosphate kinase OS=Homo sapiens GN=NME1-NME2 PE=2 SV=1;>sp|P22392|NDKB_HUMAN Nucleoside diphosphate kinase B OS=Homo sapiens GN=	10	2	2	2	1	2	2	1	2	1	2	2	1	2	2	1	1	2	2	1	2	1	2	2	1	2	2	1	1	2	2	1	2	1	2	2	1	2	2	1	20.9	20.9
E7ERW2;P00505	E7ERW2;P00505	1;1	1;1	1;1	Aspartate aminotransferase, mitochondrial	GOT2	>tr|E7ERW2|E7ERW2_HUMAN Aspartate aminotransferase OS=Homo sapiens GN=GOT2 PE=3 SV=1;>sp|P00505|AATM_HUMAN Aspartate aminotransferase, mitochondrial OS=Homo sapiens GN=GOT2 PE=1 SV=3	2	1	1	1	1	1	0	0	0	0	1	1	0	1	0	1	1	1	0	0	0	0	1	1	0	1	0	1	1	1	0	0	0	0	1	1	0	1	0	1	3.4	3.4
E7ERX9;Q9NQT8;F8VPJ2	E7ERX9;Q9NQT8;F8VPJ2	1;1;1	1;1;1	1;1;1	Kinesin-like protein KIF13B	KIF13B	>tr|E7ERX9|E7ERX9_HUMAN Kinesin-like protein KIF13B OS=Homo sapiens GN=KIF13B PE=3 SV=1;>sp|Q9NQT8|KI13B_HUMAN Kinesin-like protein KIF13B OS=Homo sapiens GN=KIF13B PE=1 SV=1;>tr|F8VPJ2|F8VPJ2_HUMAN Kinesin-like protein KIF13B OS=Homo sapiens GN=KIF13B PE=	3	1	1	1	0	1	1	1	1	1	1	1	1	1	1	1	0	1	1	1	1	1	1	1	1	1	1	1	0	1	1	1	1	1	1	1	1	1	1	1	1.5	1.5
E7ESG6;F5H0B5;Q92504;A2AAT0	E7ESG6;F5H0B5;Q92504	4;4;4;1	4;4;4;1	4;4;4;1	Zinc transporter SLC39A7	SLC39A7	>tr|E7ESG6|E7ESG6_HUMAN Zinc transporter SLC39A7 OS=Homo sapiens GN=SLC39A7 PE=4 SV=1;>tr|F5H0B5|F5H0B5_HUMAN Zinc transporter SLC39A7 OS=Homo sapiens GN=SLC39A7 PE=4 SV=1;>sp|Q92504|S39A7_HUMAN Zinc transporter SLC39A7 OS=Homo sapiens GN=SLC39A7 PE=1 SV=2	4	4	4	4	3	4	3	2	4	3	4	4	4	4	4	3	3	4	3	2	4	3	4	4	4	4	4	3	3	4	3	2	4	3	4	4	4	4	4	3	19.3	19.3
E7ESS2;E7ENQ1;G3XAA2;Q9UKE5-8;Q8N4C8-5;Q9UKE5-5;Q8N4C8-2;Q9UKE5-7;Q8N4C8-3;Q9UKE5-3;Q8N4C8-4;Q9UKE5-6;Q9UKE5-2;Q8N4C8;Q9UKE5-4;Q9UKE5;F5H5M9;F5H865;C9J338;I3L2I2;Q9HBM9;E7ETN6;I3L1U1	E7ESS2;E7ENQ1;G3XAA2	29;26;26;10;10;10;10;10;10;10;10;10;10;10;10;10;9;9;7;5;3;2;1	29;26;26;10;10;10;10;10;10;10;10;10;10;10;10;10;9;9;7;5;3;2;1	0;0;0;0;0;0;0;0;0;0;0;0;0;0;0;0;0;0;0;0;0;0;0		MAP4K4	>tr|E7ESS2|E7ESS2_HUMAN Mitogen-activated protein kinase kinase kinase kinase 4 OS=Homo sapiens GN=MAP4K4 PE=4 SV=2;>tr|E7ENQ1|E7ENQ1_HUMAN Mitogen-activated protein kinase kinase kinase kinase 4 OS=Homo sapiens GN=MAP4K4 PE=4 SV=1;>tr|G3XAA2|G3XAA2_HUMAN	23	29	29	0	21	17	21	19	20	20	20	25	18	20	18	18	21	17	21	19	20	20	20	25	18	20	18	18	0	0	0	0	0	0	0	0	0	0	0	0	28.4	28.4
Q4VXW4;E7ESW4;Q9NZT2-2;Q9NZT2	Q4VXW4;E7ESW4;Q9NZT2-2;Q9NZT2	3;3;3;3	3;3;3;3	3;3;3;3	Opioid growth factor receptor	OGFR	>tr|Q4VXW4|Q4VXW4_HUMAN Opioid growth factor receptor OS=Homo sapiens GN=OGFR PE=2 SV=1;>tr|E7ESW4|E7ESW4_HUMAN Opioid growth factor receptor OS=Homo sapiens GN=OGFR PE=4 SV=1;>sp|Q9NZT2-2|OGFR_HUMAN Isoform 2 of Opioid growth factor receptor OS=Homo sapie	4	3	3	3	2	2	2	2	1	1	1	1	3	0	0	2	2	2	2	2	1	1	1	1	3	0	0	2	2	2	2	2	1	1	1	1	3	0	0	2	10.4	10.4
E7ESY7;Q5T280	E7ESY7;Q5T280	2;1	2;1	2;1	Uncharacterized protein C9orf114	C9orf114	>tr|E7ESY7|E7ESY7_HUMAN Uncharacterized protein C9orf114 OS=Homo sapiens GN=C9orf114 PE=4 SV=2;>sp|Q5T280|CI114_HUMAN Uncharacterized protein C9orf114 OS=Homo sapiens GN=C9orf114 PE=1 SV=3	2	2	2	2	1	1	1	1	0	0	1	1	0	2	2	1	1	1	1	1	0	0	1	1	0	2	2	1	1	1	1	1	0	0	1	1	0	2	2	1	7.7	7.7
E7ET07;Q9NXR8;Q9NXR8-2;Q9NXR8-3	E7ET07;Q9NXR8	3;3;1;1	3;3;1;1	3;3;1;1	Inhibitor of growth protein 3	ING3	>tr|E7ET07|E7ET07_HUMAN Inhibitor of growth protein 3 OS=Homo sapiens GN=ING3 PE=4 SV=1;>sp|Q9NXR8|ING3_HUMAN Inhibitor of growth protein 3 OS=Homo sapiens GN=ING3 PE=1 SV=2	4	3	3	3	3	2	3	3	0	1	0	2	0	0	2	1	3	2	3	3	0	1	0	2	0	0	2	1	3	2	3	3	0	1	0	2	0	0	2	1	11.4	11.4
E7ET21;Q9NVC6;E9PM72;E9PJZ4;E9PKQ4;Q9NVC6-2	E7ET21;Q9NVC6	13;13;6;5;4;1	13;13;6;5;4;1	13;13;6;5;4;1	Mediator of RNA polymerase II transcription subunit 17	MED17	>tr|E7ET21|E7ET21_HUMAN Mediator of RNA polymerase II transcription subunit 17 OS=Homo sapiens GN=MED17 PE=4 SV=1;>sp|Q9NVC6|MED17_HUMAN Mediator of RNA polymerase II transcription subunit 17 OS=Homo sapiens GN=MED17 PE=1 SV=2	6	13	13	13	10	9	7	3	8	11	7	9	10	9	3	7	10	9	7	3	8	11	7	9	10	9	3	7	10	9	7	3	8	11	7	9	10	9	3	7	26.9	26.9
E7ET89;F5GX89;Q86UW9-2;Q86UW9;C9JEH4;C9JII1;H3BTX2	E7ET89;F5GX89;Q86UW9-2;Q86UW9	5;5;5;5;2;2;1	5;5;5;5;2;2;1	5;5;5;5;2;2;1	Probable E3 ubiquitin-protein ligase DTX2	DTX2	>tr|E7ET89|E7ET89_HUMAN Probable E3 ubiquitin-protein ligase DTX2 OS=Homo sapiens GN=DTX2 PE=4 SV=1;>tr|F5GX89|F5GX89_HUMAN Probable E3 ubiquitin-protein ligase DTX2 OS=Homo sapiens GN=DTX2 PE=4 SV=1;>sp|Q86UW9-2|DTX2_HUMAN Isoform 2 of Probable E3 ubiquit	7	5	5	5	4	2	3	2	4	3	4	4	2	1	2	2	4	2	3	2	4	3	4	4	2	1	2	2	4	2	3	2	4	3	4	4	2	1	2	2	14.1	14.1
E7ET98;Q07666-2;Q07666;Q07666-3	E7ET98;Q07666-2;Q07666;Q07666-3	4;4;4;2	4;4;4;2	4;4;4;2	KH domain-containing, RNA-binding, signal transduction-associated protein 1	KHDRBS1	>tr|E7ET98|E7ET98_HUMAN KH domain-containing, RNA-binding, signal transduction-associated protein 1 OS=Homo sapiens GN=KHDRBS1 PE=4 SV=2;>sp|Q07666-2|KHDR1_HUMAN Isoform 2 of KH domain-containing, RNA-binding, signal transduction-associated protein 1 OS=Ho	4	4	4	4	3	3	3	3	4	3	4	3	2	3	3	3	3	3	3	3	4	3	4	3	2	3	3	3	3	3	3	3	4	3	4	3	2	3	3	3	9.3	9.3
E7ETI4;H0Y9S4	E7ETI4	14;1	1;0	1;0		AFF1	>tr|E7ETI4|E7ETI4_HUMAN AF4/FMR2 family member 1 (Fragment) OS=Homo sapiens GN=AFF1 PE=4 SV=1	2	14	1	1	10	7	10	7	7	8	7	9	10	9	9	8	0	0	0	0	0	0	0	0	0	1	0	0	0	0	0	0	0	0	0	0	0	1	0	0	53.9	5.2
E7ETU3;P60953;Q5JYX0;P60953-1	E7ETU3;P60953	3;3;1;1	3;3;1;1	3;3;1;1	Cell division control protein 42 homolog	CDC42	>tr|E7ETU3|E7ETU3_HUMAN Cell division control protein 42 homolog OS=Homo sapiens GN=CDC42 PE=3 SV=1;>sp|P60953|CDC42_HUMAN Cell division control protein 42 homolog OS=Homo sapiens GN=CDC42 PE=1 SV=2	4	3	3	3	1	1	2	0	1	2	2	1	1	2	1	1	1	1	2	0	1	2	2	1	1	2	1	1	1	1	2	0	1	2	2	1	1	2	1	1	16.3	16.3
E7ETY2;E9PHK9;Q13428-5;Q13428-2;Q13428-8;Q13428-6;Q13428-7;Q13428;Q13428-3;Q13428-4	E7ETY2;E9PHK9;Q13428-5;Q13428-2;Q13428-8;Q13428-6;Q13428-7;Q13428;Q13428-3;Q13428-4	3;3;3;3;3;3;3;3;3;3	3;3;3;3;3;3;3;3;3;3	3;3;3;3;3;3;3;3;3;3	Treacle protein	TCOF1	>tr|E7ETY2|E7ETY2_HUMAN Treacle protein OS=Homo sapiens GN=TCOF1 PE=4 SV=1;>tr|E9PHK9|E9PHK9_HUMAN Treacle protein OS=Homo sapiens GN=TCOF1 PE=4 SV=1;>sp|Q13428-5|TCOF_HUMAN Isoform 5 of Treacle protein OS=Homo sapiens GN=TCOF1;>sp|Q13428-2|TCOF_HUMAN Isof	10	3	3	3	1	1	1	0	0	1	3	1	1	3	2	2	1	1	1	0	0	1	3	1	1	3	2	2	1	1	1	0	0	1	3	1	1	3	2	2	2.5	2.5
E7ETY4;E9PC69;Q7KZI7-10;Q7KZI7-13;Q7KZI7-7;Q7KZI7-2;Q7KZI7-15;Q7KZI7-5;Q7KZI7-16;Q7KZI7-4;Q7KZI7-9;Q7KZI7-12;Q7KZI7-14;Q7KZI7-3;Q7KZI7-6;Q7KZI7-11;Q7KZI7-8;Q7KZI7	E7ETY4;E9PC69;Q7KZI7-10;Q7KZI7-13;Q7KZI7-7;Q7KZI7-2;Q7KZI7-15;Q7KZI7-5;Q7KZI7-16;Q7KZI7-4;Q7KZI7-9;Q7KZI7-12;Q7KZI7-14;Q7KZI7-3;Q7KZI7-6;Q7KZI7-11;Q7KZI7-8;Q7KZI7	2;2;2;2;2;2;2;2;2;2;2;2;2;2;2;2;2;2	2;2;2;2;2;2;2;2;2;2;2;2;2;2;2;2;2;2	2;2;2;2;2;2;2;2;2;2;2;2;2;2;2;2;2;2	Serine/threonine-protein kinase MARK2	MARK2	>tr|E7ETY4|E7ETY4_HUMAN Serine/threonine-protein kinase MARK2 OS=Homo sapiens GN=MARK2 PE=4 SV=1;>tr|E9PC69|E9PC69_HUMAN Serine/threonine-protein kinase MARK2 OS=Homo sapiens GN=MARK2 PE=4 SV=2;>sp|Q7KZI7-10|MARK2_HUMAN Isoform 10 of Serine/threonine-prote	18	2	2	2	2	2	2	1	1	1	1	2	2	2	2	2	2	2	2	1	1	1	1	2	2	2	2	2	2	2	2	1	1	1	1	2	2	2	2	2	5.9	5.9
E7ETZ3;Q9BVC6	E7ETZ3;Q9BVC6	3;3	3;3	3;3	Transmembrane protein 109	TMEM109	>tr|E7ETZ3|E7ETZ3_HUMAN Transmembrane protein 109 OS=Homo sapiens GN=TMEM109 PE=4 SV=1;>sp|Q9BVC6|TM109_HUMAN Transmembrane protein 109 OS=Homo sapiens GN=TMEM109 PE=1 SV=1	2	3	3	3	3	1	3	1	3	2	2	2	2	2	2	3	3	1	3	1	3	2	2	2	2	2	2	3	3	1	3	1	3	2	2	2	2	2	2	3	9.4	9.4
E7EU96;Q5U5J2;P68400;P68400-2	E7EU96;Q5U5J2;P68400;P68400-2	18;18;18;9	18;18;18;9	18;18;18;9	Casein kinase II subunit alpha	CSNK2A1	>tr|E7EU96|E7EU96_HUMAN Casein kinase II subunit alpha OS=Homo sapiens GN=CSNK2A1 PE=4 SV=1;>tr|Q5U5J2|Q5U5J2_HUMAN CSNK2A1 protein OS=Homo sapiens GN=CSNK2A1 PE=1 SV=1;>sp|P68400|CSK21_HUMAN Casein kinase II subunit alpha OS=Homo sapiens GN=CSNK2A1 PE=1 S	4	18	18	18	15	16	16	16	17	16	16	16	18	16	14	16	15	16	16	16	17	16	16	16	18	16	14	16	15	16	16	16	17	16	16	16	18	16	14	16	56.6	56.6
F5GYC1;E7EUE1;P28288;P28288-2;P28288-3	F5GYC1;E7EUE1;P28288;P28288-2	9;9;9;6;1	9;9;9;6;1	9;9;9;6;1	ATP-binding cassette sub-family D member 3	ABCD3	>tr|F5GYC1|F5GYC1_HUMAN ATP-binding cassette sub-family D member 3 OS=Homo sapiens GN=ABCD3 PE=3 SV=1;>tr|E7EUE1|E7EUE1_HUMAN ATP-binding cassette sub-family D member 3 OS=Homo sapiens GN=ABCD3 PE=3 SV=1;>sp|P28288|ABCD3_HUMAN ATP-binding cassette sub-fami	5	9	9	9	4	2	3	1	2	1	6	4	2	2	4	5	4	2	3	1	2	1	6	4	2	2	4	5	4	2	3	1	2	1	6	4	2	2	4	5	19.6	19.6
E7EUG0;Q9NWB6-2;Q9NWB6	E7EUG0;Q9NWB6-2;Q9NWB6	2;2;2	2;2;2	2;2;2	Arginine and glutamate-rich protein 1	ARGLU1	>tr|E7EUG0|E7EUG0_HUMAN Arginine and glutamate-rich protein 1 OS=Homo sapiens GN=ARGLU1 PE=4 SV=1;>sp|Q9NWB6-2|ARGL1_HUMAN Isoform 2 of Arginine and glutamate-rich protein 1 OS=Homo sapiens GN=ARGLU1;>sp|Q9NWB6|ARGL1_HUMAN Arginine and glutamate-rich prote	3	2	2	2	1	1	1	2	1	1	1	1	1	1	1	1	1	1	1	2	1	1	1	1	1	1	1	1	1	1	1	2	1	1	1	1	1	1	1	1	7.2	7.2
E7EWI7;H0YM23;O75179-4;G5E964;E7EUV3;O75179-2;O75179	E7EWI7;H0YM23;O75179-4;G5E964;E7EUV3;O75179-2;O75179	2;2;2;2;2;2;2	2;2;2;2;2;2;2	2;2;2;2;2;2;2	Ankyrin repeat domain-containing protein 17	ANKRD17	>tr|E7EWI7|E7EWI7_HUMAN Ankyrin repeat domain-containing protein 17 OS=Homo sapiens GN=ANKRD17 PE=4 SV=1;>tr|H0YM23|H0YM23_HUMAN Ankyrin repeat domain-containing protein 17 (Fragment) OS=Homo sapiens GN=ANKRD17 PE=4 SV=1;>sp|O75179-4|ANR17_HUMAN Isoform 4	7	2	2	2	1	1	1	0	2	2	2	1	1	1	1	1	1	1	1	0	2	2	2	1	1	1	1	1	1	1	1	0	2	2	2	1	1	1	1	1	1.6	1.6
E7EUY5;Q04837;C9K0U8	E7EUY5;Q04837;C9K0U8	6;6;5	6;6;5	6;6;5	Single-stranded DNA-binding protein, mitochondrial	SSBP1	>tr|E7EUY5|E7EUY5_HUMAN Single-stranded DNA-binding protein, mitochondrial (Fragment) OS=Homo sapiens GN=SSBP1 PE=4 SV=1;>sp|Q04837|SSBP_HUMAN Single-stranded DNA-binding protein, mitochondrial OS=Homo sapiens GN=SSBP1 PE=1 SV=1;>tr|C9K0U8|C9K0U8_HUMAN Sin	3	6	6	6	6	5	5	4	6	6	6	5	6	6	6	6	6	5	5	4	6	6	6	5	6	6	6	6	6	5	5	4	6	6	6	5	6	6	6	6	50.4	50.4
H0YJJ1;G3V2F8;Q8TBZ3;Q8TBZ3-2;E7EUY8;B5MBZ9;B3KR43;B3KPG5;H0YKE8;F8W9S4;Q8TBZ3-3;F5H8E6;H0YNU0;G3V5V2	H0YJJ1;G3V2F8;Q8TBZ3;Q8TBZ3-2;E7EUY8;B5MBZ9;B3KR43;B3KPG5	18;18;18;18;18;17;10;9;8;8;8;6;2;1	18;18;18;18;18;17;10;9;8;8;8;6;2;1	18;18;18;18;18;17;10;9;8;8;8;6;2;1	WD repeat-containing protein 20	WDR20;ANO6	>tr|H0YJJ1|H0YJJ1_HUMAN WD repeat-containing protein 20 OS=Homo sapiens GN=WDR20 PE=4 SV=1;>tr|G3V2F8|G3V2F8_HUMAN WD repeat-containing protein 20 OS=Homo sapiens GN=WDR20 PE=4 SV=1;>sp|Q8TBZ3|WDR20_HUMAN WD repeat-containing protein 20 OS=Homo sapiens GN=	14	18	18	18	12	13	10	12	12	12	11	14	12	13	11	13	12	13	10	12	12	12	11	14	12	13	11	13	12	13	10	12	12	12	11	14	12	13	11	13	42.1	42.1
E7EVA0;P27816;P27816-6;P27816-2;E9PGM5;P27816-4;B9ZVR1;H0Y2V1;B5MEG9;B4DSQ1;F8W9U4	E7EVA0;P27816;P27816-6;P27816-2;E9PGM5;P27816-4;B9ZVR1;H0Y2V1;B5MEG9	13;13;12;11;10;10;9;7;7;6;6	13;13;12;11;10;10;9;7;7;6;6	5;5;4;4;2;2;1;1;0;1;1	Microtubule-associated protein;Microtubule-associated protein 4	MAP4	>tr|E7EVA0|E7EVA0_HUMAN Microtubule-associated protein OS=Homo sapiens GN=MAP4 PE=4 SV=1;>sp|P27816|MAP4_HUMAN Microtubule-associated protein 4 OS=Homo sapiens GN=MAP4 PE=1 SV=3;>sp|P27816-6|MAP4_HUMAN Isoform 6 of Microtubule-associated protein 4 OS=Homo	11	13	13	5	8	8	10	8	8	12	11	9	8	7	7	8	8	8	10	8	8	12	11	9	8	7	7	8	2	2	3	2	1	4	4	3	1	1	1	2	8	8
E9PEY4;E7EVB6;F5GZG4;O60941-3;O60941-5;O60941-2;O60941-4;G5E9F6;O60941;E9PE76;E7ES64;F8W9U0;F5H6T7;B7Z202;F5H5C1;E9PEH8;F8WE01;Q9Y4J8-8;Q9Y4J8-6;Q9Y4J8-10;B4DIR0;Q9Y4J8-5;Q9Y4J8-4;Q9Y4J8-3;Q9Y4J8-2;Q9Y4J8	E9PEY4;E7EVB6;F5GZG4;O60941-3;O60941-5;O60941-2;O60941-4;G5E9F6;O60941	3;3;3;3;3;3;3;3;3;1;1;1;1;1;1;1;1;1;1;1;1;1;1;1;1;1	3;3;3;3;3;3;3;3;3;1;1;1;1;1;1;1;1;1;1;1;1;1;1;1;1;1	3;3;3;3;3;3;3;3;3;1;1;1;1;1;1;1;1;1;1;1;1;1;1;1;1;1	Dystrobrevin;Dystrobrevin beta	DTNB	>tr|E9PEY4|E9PEY4_HUMAN Dystrobrevin beta OS=Homo sapiens GN=DTNB PE=4 SV=1;>tr|E7EVB6|E7EVB6_HUMAN Dystrobrevin beta OS=Homo sapiens GN=DTNB PE=4 SV=2;>tr|F5GZG4|F5GZG4_HUMAN Dystrobrevin beta OS=Homo sapiens GN=DTNB PE=4 SV=1;>sp|O60941-3|DTNB_HUMAN Isof	26	3	3	3	0	1	1	1	1	1	1	2	1	1	2	1	0	1	1	1	1	1	1	2	1	1	2	1	0	1	1	1	1	1	1	2	1	1	2	1	8.3	8.3
E7EVD1;O43395;B4DSY9	E7EVD1;O43395;B4DSY9	2;2;1	2;2;1	2;2;1	U4/U6 small nuclear ribonucleoprotein Prp3	PRPF3	>tr|E7EVD1|E7EVD1_HUMAN U4/U6 small nuclear ribonucleoprotein Prp3 OS=Homo sapiens GN=PRPF3 PE=4 SV=1;>sp|O43395|PRPF3_HUMAN U4/U6 small nuclear ribonucleoprotein Prp3 OS=Homo sapiens GN=PRPF3 PE=1 SV=2;>tr|B4DSY9|B4DSY9_HUMAN U4/U6 small nuclear ribonucle	3	2	2	2	0	0	1	0	0	2	0	1	1	1	1	1	0	0	1	0	0	2	0	1	1	1	1	1	0	0	1	0	0	2	0	1	1	1	1	1	3.5	3.5
E7EWF1;P36578;H3BU31;H3BM89;H3BTP7;B4DP82;B4DMJ2	E7EWF1;P36578;H3BU31;H3BM89;H3BTP7	22;22;12;12;11;10;10	22;22;12;12;11;10;10	22;22;12;12;11;10;10	60S ribosomal protein L4	RPL4	>tr|E7EWF1|E7EWF1_HUMAN 60S ribosomal protein L4 OS=Homo sapiens GN=RPL4 PE=4 SV=1;>sp|P36578|RL4_HUMAN 60S ribosomal protein L4 OS=Homo sapiens GN=RPL4 PE=1 SV=5;>tr|H3BU31|H3BU31_HUMAN 60S ribosomal protein L4 (Fragment) OS=Homo sapiens GN=RPL4 PE=4 SV=1	7	22	22	22	18	14	17	15	18	13	20	17	22	14	12	15	18	14	17	15	18	13	20	17	22	14	12	15	18	14	17	15	18	13	20	17	22	14	12	15	46.3	46.3
H0YFE0;E7EWM7;P54274-2;P54274	H0YFE0;E7EWM7;P54274-2;P54274	1;1;1;1	1;1;1;1	1;1;1;1	Telomeric repeat-binding factor 1	TERF1	>tr|H0YFE0|H0YFE0_HUMAN Telomeric repeat-binding factor 1 OS=Homo sapiens GN=TERF1 PE=4 SV=1;>tr|E7EWM7|E7EWM7_HUMAN Telomeric repeat-binding factor 1 (Fragment) OS=Homo sapiens GN=TERF1 PE=4 SV=1;>sp|P54274-2|TERF1_HUMAN Isoform 2 of Telomeric repeat-bind	4	1	1	1	0	1	1	0	0	0	0	0	0	0	0	1	0	1	1	0	0	0	0	0	0	0	0	1	0	1	1	0	0	0	0	0	0	0	0	1	22	22
H0Y3R4;E7EWN3;Q9C0A6-2;Q9C0A6-3;Q9C0A6	H0Y3R4;E7EWN3;Q9C0A6-2;Q9C0A6-3;Q9C0A6	2;2;2;2;2	1;1;1;1;1	1;1;1;1;1	SET domain-containing protein 5	SETD5	>tr|H0Y3R4|H0Y3R4_HUMAN SET domain-containing protein 5 (Fragment) OS=Homo sapiens GN=SETD5 PE=4 SV=1;>tr|E7EWN3|E7EWN3_HUMAN SET domain-containing protein 5 OS=Homo sapiens GN=SETD5 PE=4 SV=1;>sp|Q9C0A6-2|SETD5_HUMAN Isoform 2 of SET domain-containing pro	5	2	1	1	1	0	0	0	0	1	1	1	1	1	1	1	1	0	0	0	0	1	0	0	1	1	1	1	1	0	0	0	0	1	0	0	1	1	1	1	3.7	2.9
H7C1I9;E7EWQ5;F8WAQ9;O15021-2;O15021-3;O15021-1;O15021	H7C1I9;E7EWQ5;F8WAQ9;O15021-2;O15021-3;O15021-1;O15021	7;7;7;7;7;7;7	7;7;7;7;7;7;7	7;7;7;7;7;7;7	Microtubule-associated serine/threonine-protein kinase 4	MAST4	>tr|H7C1I9|H7C1I9_HUMAN Microtubule-associated serine/threonine-protein kinase 4 (Fragment) OS=Homo sapiens GN=MAST4 PE=4 SV=1;>tr|E7EWQ5|E7EWQ5_HUMAN Microtubule-associated serine/threonine-protein kinase 4 OS=Homo sapiens GN=MAST4 PE=4 SV=1;>tr|F8WAQ9|F8	7	7	7	7	1	0	4	1	1	0	3	6	2	0	0	0	1	0	4	1	1	0	3	6	2	0	0	0	1	0	4	1	1	0	3	6	2	0	0	0	5.8	5.8
E7EX81;P19338;H7BY16;Q9BQ02	E7EX81;P19338;H7BY16;Q9BQ02	32;32;21;19	32;32;21;19	32;32;21;19	Nucleolin	NCL	>tr|E7EX81|E7EX81_HUMAN Nucleolin OS=Homo sapiens GN=NCL PE=4 SV=1;>sp|P19338|NUCL_HUMAN Nucleolin OS=Homo sapiens GN=NCL PE=1 SV=3;>tr|H7BY16|H7BY16_HUMAN Nucleolin (Fragment) OS=Homo sapiens GN=NCL PE=4 SV=1;>tr|Q9BQ02|Q9BQ02_HUMAN NCL protein OS=Homo sa	4	32	32	32	22	27	21	23	23	23	23	23	29	25	25	24	22	27	21	23	23	23	23	23	29	25	25	24	22	27	21	23	23	23	23	23	29	25	25	24	42.4	42.4
E9PAL9;Q9H857-2;Q9H857;C9JTZ6;Q9H857-4;Q9H857-3;C9J036;H7C519;H7C4G8	E9PAL9;Q9H857-2;Q9H857;C9JTZ6;Q9H857-4;Q9H857-3	7;6;6;6;5;5;2;2;2	7;6;6;6;5;5;2;2;2	7;6;6;6;5;5;2;2;2	5-nucleotidase domain-containing protein 2	NT5DC2	>tr|E9PAL9|E9PAL9_HUMAN 5-nucleotidase domain-containing protein 2 OS=Homo sapiens GN=NT5DC2 PE=3 SV=1;>sp|Q9H857-2|NT5D2_HUMAN Isoform 2 of 5-nucleotidase domain-containing protein 2 OS=Homo sapiens GN=NT5DC2;>sp|Q9H857|NT5D2_HUMAN 5-nucleotidase domai	9	7	7	7	4	0	3	0	6	4	5	6	3	3	5	4	4	0	3	0	6	4	5	6	3	3	5	4	4	0	3	0	6	4	5	6	3	3	5	4	15.6	15.6
Q96EX2-3;E9PAM7;Q96EX2;F8W6L4;Q96EX2-2;Q96EX2-4	Q96EX2-3;E9PAM7;Q96EX2;F8W6L4;Q96EX2-2	5;5;5;3;3;2	5;5;5;3;3;2	5;5;5;3;3;2	RING finger and transmembrane domain-containing protein 2	RNFT2	>sp|Q96EX2-3|RNFT2_HUMAN Isoform 3 of RING finger and transmembrane domain-containing protein 2 OS=Homo sapiens GN=RNFT2;>tr|E9PAM7|E9PAM7_HUMAN RING finger and transmembrane domain-containing protein 2 OS=Homo sapiens GN=RNFT2 PE=4 SV=1;>sp|Q96EX2|RNFT2_H	6	5	5	5	4	4	4	5	4	3	4	4	5	5	3	4	4	4	4	5	4	3	4	4	5	5	3	4	4	4	4	5	4	3	4	4	5	5	3	4	20.3	20.3
E9PAU2	E9PAU2	36	36	2		RAVER1	>tr|E9PAU2|E9PAU2_HUMAN Ribonucleoprotein PTB-binding 1 OS=Homo sapiens GN=RAVER1 PE=4 SV=1	1	36	36	2	31	29	31	27	33	31	33	33	33	32	28	32	31	29	31	27	33	31	33	33	33	32	28	32	2	2	2	2	2	2	2	2	2	2	2	2	69.2	69.2
E9PAY2;E9PAU7;Q9HAJ7	E9PAY2;E9PAU7;Q9HAJ7	1;1;1	1;1;1	1;1;1	Histone deacetylase complex subunit SAP30L	SAP30L	>tr|E9PAY2|E9PAY2_HUMAN Histone deacetylase complex subunit SAP30L OS=Homo sapiens GN=SAP30L PE=4 SV=1;>tr|E9PAU7|E9PAU7_HUMAN Histone deacetylase complex subunit SAP30L OS=Homo sapiens GN=SAP30L PE=4 SV=1;>sp|Q9HAJ7|SP30L_HUMAN Histone deacetylase complex	3	1	1	1	1	1	1	0	0	1	1	1	1	1	0	1	1	1	1	0	0	1	1	1	1	1	0	1	1	1	1	0	0	1	1	1	1	1	0	1	6.6	6.6
F8W1N5;F8VZJ2;F8VNW4;F8W0W4;H0YHX9;Q13765;F8VU71;E9PAV3	F8W1N5;F8VZJ2;F8VNW4;F8W0W4;H0YHX9;Q13765;F8VU71;E9PAV3	2;2;2;2;2;2;2;2	2;2;2;2;2;2;2;2	2;2;2;2;2;2;2;2	Nascent polypeptide-associated complex subunit alpha;Nascent polypeptide-associated complex subunit alpha, muscle-specific form	NACA	>tr|F8W1N5|F8W1N5_HUMAN Nascent polypeptide-associated complex subunit alpha (Fragment) OS=Homo sapiens GN=NACA PE=4 SV=1;>tr|F8VZJ2|F8VZJ2_HUMAN Nascent polypeptide-associated complex subunit alpha OS=Homo sapiens GN=NACA PE=4 SV=1;>tr|F8VNW4|F8VNW4_HUMAN	8	2	2	2	2	0	0	0	1	0	0	0	0	0	1	1	2	0	0	0	1	0	0	0	0	0	1	1	2	0	0	0	1	0	0	0	0	0	1	1	40.8	40.8
F8W0Q9;E9PAX8;Q8NEY8-8;Q8NEY8-2;Q8NEY8;F8VPY7;F8VWU8;F8WF16;F8W6A0;Q8NEY8-5;Q8NEY8-6;Q8NEY8-3;F8VRK2;Q8NEY8-7	F8W0Q9;E9PAX8;Q8NEY8-8;Q8NEY8-2;Q8NEY8;F8VPY7;F8VWU8;F8WF16;F8W6A0;Q8NEY8-5;Q8NEY8-6;Q8NEY8-3	3;3;3;3;3;2;2;2;2;2;2;2;1;1	3;3;3;3;3;2;2;2;2;2;2;2;1;1	3;3;3;3;3;2;2;2;2;2;2;2;1;1	Periphilin-1	PPHLN1	>tr|F8W0Q9|F8W0Q9_HUMAN Periphilin-1 OS=Homo sapiens GN=PPHLN1 PE=4 SV=1;>tr|E9PAX8|E9PAX8_HUMAN Periphilin-1 OS=Homo sapiens GN=PPHLN1 PE=4 SV=1;>sp|Q8NEY8-8|PPHLN_HUMAN Isoform 8 of Periphilin-1 OS=Homo sapiens GN=PPHLN1;>sp|Q8NEY8-2|PPHLN_HUMAN Isoform	14	3	3	3	3	2	2	2	1	1	1	2	1	2	3	3	3	2	2	2	1	1	1	2	1	2	3	3	3	2	2	2	1	1	1	2	1	2	3	3	9.4	9.4
E9PAZ2;Q96HR8;D6RIB3	E9PAZ2;Q96HR8;D6RIB3	2;2;1	2;2;1	2;2;1	H/ACA ribonucleoprotein complex non-core subunit NAF1	NAF1;TMX1	>tr|E9PAZ2|E9PAZ2_HUMAN H/ACA ribonucleoprotein complex non-core subunit NAF1 OS=Homo sapiens GN=NAF1 PE=4 SV=1;>sp|Q96HR8|NAF1_HUMAN H/ACA ribonucleoprotein complex non-core subunit NAF1 OS=Homo sapiens GN=NAF1 PE=1 SV=2;>tr|D6RIB3|D6RIB3_HUMAN H/ACA ribo	3	2	2	2	1	1	2	1	1	1	1	1	1	1	1	1	1	1	2	1	1	1	1	1	1	1	1	1	1	1	2	1	1	1	1	1	1	1	1	1	6.4	6.4
P78346;E9PB02;C9JJX7;Q5VU10;Q5VU11	P78346;E9PB02;C9JJX7;Q5VU10;Q5VU11	14;14;13;9;9	14;14;13;9;9	14;14;13;9;9	Ribonuclease P protein subunit p30	RPP30	>sp|P78346|RPP30_HUMAN Ribonuclease P protein subunit p30 OS=Homo sapiens GN=RPP30 PE=1 SV=1;>tr|E9PB02|E9PB02_HUMAN Ribonuclease P protein subunit p30 OS=Homo sapiens GN=RPP30 PE=4 SV=1;>tr|C9JJX7|C9JJX7_HUMAN Ribonuclease P protein subunit p30 OS=Homo sa	5	14	14	14	10	11	13	10	11	9	10	11	9	13	12	13	10	11	13	10	11	9	10	11	9	13	12	13	10	11	13	10	11	9	10	11	9	13	12	13	67.5	67.5
Q15032-2;G5E9G8;E9PG42;Q15032;E9PBB4;H7C207;C9JJI1;H7C1X4;H7BZ47;H7C2F9	Q15032-2;G5E9G8;E9PG42;Q15032;E9PBB4;H7C207	6;6;6;6;6;5;2;1;1;1	6;6;6;6;6;5;2;1;1;1	6;6;6;6;6;5;2;1;1;1	R3H domain-containing protein 1	R3HDM1	>sp|Q15032-2|R3HD1_HUMAN Isoform 2 of R3H domain-containing protein 1 OS=Homo sapiens GN=R3HDM1;>tr|G5E9G8|G5E9G8_HUMAN R3H domain containing 1, isoform CRA_a OS=Homo sapiens GN=R3HDM1 PE=4 SV=1;>tr|E9PG42|E9PG42_HUMAN R3H domain-containing protein 1 OS=Ho	10	6	6	6	2	2	3	2	3	1	2	1	3	0	0	2	2	2	3	2	3	1	2	1	3	0	0	2	2	2	3	2	3	1	2	1	3	0	0	2	9.6	9.6
Q5QPK2;H0Y368;E9PBD4;O60762;E9PHH5;Q5QPJ9	Q5QPK2;H0Y368;E9PBD4;O60762;E9PHH5;Q5QPJ9	10;10;10;10;7;5	10;10;10;10;7;5	10;10;10;10;7;5	Dolichol-phosphate mannosyltransferase subunit 1	DPM1	>tr|Q5QPK2|Q5QPK2_HUMAN Dolichol-phosphate mannosyltransferase OS=Homo sapiens GN=DPM1 PE=2 SV=1;>tr|H0Y368|H0Y368_HUMAN Dolichol-phosphate mannosyltransferase (Fragment) OS=Homo sapiens GN=DPM1 PE=4 SV=1;>tr|E9PBD4|E9PBD4_HUMAN Dolichol-phosphate mannosyl	6	10	10	10	6	8	8	4	6	8	7	7	8	9	8	8	6	8	8	4	6	8	7	7	8	9	8	8	6	8	8	4	6	8	7	7	8	9	8	8	41.1	41.1
E9PBK0;O14514	E9PBK0;O14514	2;2	2;2	2;2	Brain-specific angiogenesis inhibitor 1	BAI1	>tr|E9PBK0|E9PBK0_HUMAN Brain-specific angiogenesis inhibitor 1 OS=Homo sapiens GN=BAI1 PE=4 SV=1;>sp|O14514|BAI1_HUMAN Brain-specific angiogenesis inhibitor 1 OS=Homo sapiens GN=BAI1 PE=1 SV=1	2	2	2	2	2	2	2	1	1	2	1	2	2	2	2	2	2	2	2	1	1	2	1	2	2	2	2	2	2	2	2	1	1	2	1	2	2	2	2	2	1.9	1.9
E9PBM3;F5GXF9;E7EMC5;E7EMS5;F5H1V4	E9PBM3;F5GXF9	32;17;14;14;12	32;17;14;14;12	1;1;0;0;0	AF4/FMR2 family member 1	AFF1	>tr|E9PBM3|E9PBM3_HUMAN AF4/FMR2 family member 1 OS=Homo sapiens GN=AFF1 PE=4 SV=1;>tr|F5GXF9|F5GXF9_HUMAN AF4/FMR2 family member 1 OS=Homo sapiens GN=AFF1 PE=4 SV=1	5	32	32	1	24	18	26	17	20	16	15	17	22	20	18	20	24	18	26	17	20	16	15	17	22	20	18	20	1	1	1	1	0	1	0	0	1	1	0	0	35.5	35.5
E9PBR6;Q5SNT2-2;Q5SNT2;H0Y4R5	E9PBR6;Q5SNT2-2;Q5SNT2;H0Y4R5	4;4;4;3	4;4;4;3	4;4;4;3	Transmembrane protein 201	TMEM201	>tr|E9PBR6|E9PBR6_HUMAN Transmembrane protein 201 OS=Homo sapiens GN=TMEM201 PE=4 SV=1;>sp|Q5SNT2-2|TM201_HUMAN Isoform SAMP1 of Transmembrane protein 201 OS=Homo sapiens GN=TMEM201;>sp|Q5SNT2|TM201_HUMAN Transmembrane protein 201 OS=Homo sapiens GN=TMEM20	4	4	4	4	2	1	2	3	3	2	2	3	2	3	1	1	2	1	2	3	3	2	2	3	2	3	1	1	2	1	2	3	3	2	2	3	2	3	1	1	6.7	6.7
E9PBV3	E9PBV3	4	4	4	Suprabasin	SBSN	>tr|E9PBV3|E9PBV3_HUMAN Suprabasin OS=Homo sapiens GN=SBSN PE=4 SV=1	1	4	4	4	0	1	0	1	1	1	1	0	2	3	3	1	0	1	0	1	1	1	1	0	2	3	3	1	0	1	0	1	1	1	1	0	2	3	3	1	19	19
E9PC52;Q16576;Q16576-2;Q5JP02;Q5JP01;Q5JNZ6;C9JAJ9;C9J959;C9J7L0	E9PC52;Q16576;Q16576-2	10;10;10;4;4;2;1;1;1	4;4;4;0;2;1;0;0;1	4;4;4;0;2;1;0;0;1	Histone-binding protein RBBP7	RBBP7	>tr|E9PC52|E9PC52_HUMAN Histone-binding protein RBBP7 OS=Homo sapiens GN=RBBP7 PE=4 SV=1;>sp|Q16576|RBBP7_HUMAN Histone-binding protein RBBP7 OS=Homo sapiens GN=RBBP7 PE=1 SV=1;>sp|Q16576-2|RBBP7_HUMAN Isoform 2 of Histone-binding protein RBBP7 OS=Homo sap	9	10	4	4	9	8	9	7	6	8	8	7	8	8	8	7	4	2	3	3	3	3	3	2	3	3	3	2	4	2	3	3	3	3	3	2	3	3	3	2	30.3	19
E9PCH4;Q8TEU7;E7EWD4;Q8TEU7-2;Q8TEU7-5;Q8TEU7-3;Q8TEU7-4;D6RE77;B7Z7Y1;E9PDV7;Q9Y4G8	E9PCH4;Q8TEU7;E7EWD4;Q8TEU7-2;Q8TEU7-5;Q8TEU7-3;Q8TEU7-4;D6RE77;B7Z7Y1	8;8;7;7;7;7;7;6;5;2;1	8;8;7;7;7;7;7;6;5;2;1	8;8;7;7;7;7;7;6;5;2;1	Rap guanine nucleotide exchange factor 6	RAPGEF6	>tr|E9PCH4|E9PCH4_HUMAN Folliculin-interacting protein 1 OS=Homo sapiens GN=FNIP1 PE=4 SV=1;>sp|Q8TEU7|RPGF6_HUMAN Rap guanine nucleotide exchange factor 6 OS=Homo sapiens GN=RAPGEF6 PE=1 SV=2;>tr|E7EWD4|E7EWD4_HUMAN Rap guanine nucleotide exchange factor	11	8	8	8	3	2	6	4	2	2	3	4	1	0	1	1	3	2	6	4	2	2	3	4	1	0	1	1	3	2	6	4	2	2	3	4	1	0	1	1	7.1	7.1
E9PCK6;E9PDX1	E9PCK6;E9PDX1	1;1	1;1	1;1	Neurabin-1	PPP1R9A	>tr|E9PCK6|E9PCK6_HUMAN Neurabin-1 OS=Homo sapiens GN=PPP1R9A PE=4 SV=2;>tr|E9PDX1|E9PDX1_HUMAN Neurabin-1 OS=Homo sapiens GN=PPP1R9A PE=4 SV=1	2	1	1	1	1	0	0	0	0	0	0	0	1	0	0	0	1	0	0	0	0	0	0	0	1	0	0	0	1	0	0	0	0	0	0	0	1	0	0	0	1.1	1.1
E9PCQ2;F5H696;O75417-2;O75417	E9PCQ2;F5H696;O75417-2;O75417	2;1;1;1	2;1;1;1	2;1;1;1	DNA polymerase theta	POLQ	>tr|E9PCQ2|E9PCQ2_HUMAN DNA polymerase theta OS=Homo sapiens GN=POLQ PE=4 SV=2;>tr|F5H696|F5H696_HUMAN DNA polymerase theta OS=Homo sapiens GN=POLQ PE=4 SV=1;>sp|O75417-2|DPOLQ_HUMAN Isoform 2 of DNA polymerase theta OS=Homo sapiens GN=POLQ;>sp|O75417|DPOL	4	2	2	2	1	1	1	0	1	1	1	1	1	2	1	1	1	1	1	0	1	1	1	1	1	2	1	1	1	1	1	0	1	1	1	1	1	2	1	1	0.8	0.8
E9PFG7;F5H801;E9PDF2;E9PCR7;Q02218-2;Q02218;Q02218-3;Q9ULD0-3;Q9ULD0-2;Q9ULD0	E9PFG7;F5H801;E9PDF2;E9PCR7;Q02218-2;Q02218	3;3;3;3;3;3;1;1;1;1	3;3;3;3;3;3;1;1;1;1	3;3;3;3;3;3;1;1;1;1	2-oxoglutarate dehydrogenase, mitochondrial	OGDH	>tr|E9PFG7|E9PFG7_HUMAN 2-oxoglutarate dehydrogenase, mitochondrial OS=Homo sapiens GN=OGDH PE=4 SV=1;>tr|F5H801|F5H801_HUMAN 2-oxoglutarate dehydrogenase, mitochondrial OS=Homo sapiens GN=OGDH PE=4 SV=1;>tr|E9PDF2|E9PDF2_HUMAN 2-oxoglutarate dehydrogenase	10	3	3	3	1	2	1	1	1	0	1	2	0	1	1	2	1	2	1	1	1	0	1	2	0	1	1	2	1	2	1	1	1	0	1	2	0	1	1	2	4.7	4.7
Q96RT1-2;Q96RT1;E9PCR8;Q96RT1-5;Q96RT1-3;Q96RT1-7;Q96RT1-6;Q96RT1-4;B4DIP2;H0YA04;H0Y9E8;G8JLB9;B1AKT2;Q96NW7-3	Q96RT1-2;Q96RT1;E9PCR8;Q96RT1-5;Q96RT1-3;Q96RT1-7;Q96RT1-6;Q96RT1-4	65;65;65;64;64;62;62;62;23;8;3;1;1;1	1;1;1;1;1;1;1;1;0;0;0;0;0;0	1;1;1;1;1;1;1;1;0;0;0;0;0;0	Protein LAP2	ERBB2IP	>sp|Q96RT1-2|LAP2_HUMAN Isoform 2 of Protein LAP2 OS=Homo sapiens GN=ERBB2IP;>sp|Q96RT1|LAP2_HUMAN Protein LAP2 OS=Homo sapiens GN=ERBB2IP PE=1 SV=2;>tr|E9PCR8|E9PCR8_HUMAN Protein LAP2 OS=Homo sapiens GN=ERBB2IP PE=4 SV=1;>sp|Q96RT1-5|LAP2_HUMAN Isoform 5	14	65	1	1	51	53	53	51	51	51	52	55	55	56	52	56	1	1	1	1	1	1	1	1	1	1	1	1	1	1	1	1	1	1	1	1	1	1	1	1	59.2	1.3
E9PCY7;G8JLB6;P31943;H0YB39;E5RGV0;D6RIU0;H0YBG7;H0YBD7;D6RBM0;E5RGH4;E7EQJ0;D6RAM1;F5GZT4;D6R9T0;D6RFM3;D6RIT2;E7EN40;D6RDU3;D6RJ04;D6RIH9;D6R9D3;D6RF17;D6RDL0;H0YAQ2	E9PCY7;G8JLB6;P31943;H0YB39;E5RGV0;D6RIU0;H0YBG7;H0YBD7;D6RBM0	6;6;6;4;3;3;3;3;3;2;2;2;2;2;2;2;2;2;2;2;1;1;1;1	4;4;4;2;3;3;1;1;3;2;2;2;0;2;2;2;2;2;2;2;1;1;1;1	1;1;1;0;1;1;0;0;1;0;1;1;0;1;1;1;1;1;1;1;1;1;1;0	Heterogeneous nuclear ribonucleoprotein H;Heterogeneous nuclear ribonucleoprotein H, N-terminally processed	HNRNPH1	>tr|E9PCY7|E9PCY7_HUMAN Heterogeneous nuclear ribonucleoprotein H, N-terminally processed OS=Homo sapiens GN=HNRNPH1 PE=4 SV=1;>tr|G8JLB6|G8JLB6_HUMAN Heterogeneous nuclear ribonucleoprotein H, N-terminally processed OS=Homo sapiens GN=HNRNPH1 PE=4 SV=1;>s	24	6	4	1	4	5	5	5	5	5	6	5	5	5	4	5	2	3	3	3	3	3	4	3	3	3	2	3	1	1	1	1	1	1	1	1	1	1	1	1	20	13.8
E9PD64;H0YKT5;F8W964;H0YLI3	E9PD64;H0YKT5;F8W964;H0YLI3	27;26;26;15	1;1;1;1	0;0;0;0	Transducin-like enhancer protein 3	TLE3;LITAF	>tr|E9PD64|E9PD64_HUMAN Transducin-like enhancer protein 3 OS=Homo sapiens GN=TLE3 PE=4 SV=1;>tr|H0YKT5|H0YKT5_HUMAN Transducin-like enhancer protein 3 OS=Homo sapiens GN=TLE3 PE=4 SV=1;>tr|F8W964|F8W964_HUMAN Transducin-like enhancer protein 3 OS=Homo sap	4	27	1	0	18	15	21	17	20	18	20	19	25	16	14	16	1	1	1	1	1	1	1	1	1	1	1	1	0	0	0	0	0	0	0	0	0	0	0	0	48.2	2.2
E9PDB5;Q8N2G8;Q8N2G8-2	E9PDB5;Q8N2G8;Q8N2G8-2	5;5;4	5;5;4	5;5;4	GH3 domain-containing protein	GHDC	>tr|E9PDB5|E9PDB5_HUMAN GH3 domain-containing protein OS=Homo sapiens GN=GHDC PE=4 SV=1;>sp|Q8N2G8|GHDC_HUMAN GH3 domain-containing protein OS=Homo sapiens GN=GHDC PE=1 SV=2;>sp|Q8N2G8-2|GHDC_HUMAN Isoform 2 of GH3 domain-containing protein OS=Homo sapiens	3	5	5	5	1	1	4	1	3	2	3	5	0	2	2	1	1	1	4	1	3	2	3	5	0	2	2	1	1	1	4	1	3	2	3	5	0	2	2	1	11	11
E9PDP9;Q8WV44-3;Q8WV44	E9PDP9;Q8WV44-3;Q8WV44	1;1;1	1;1;1	1;1;1	E3 ubiquitin-protein ligase TRIM41	TRIM41	>tr|E9PDP9|E9PDP9_HUMAN E3 ubiquitin-protein ligase TRIM41 OS=Homo sapiens GN=TRIM41 PE=4 SV=1;>sp|Q8WV44-3|TRI41_HUMAN Isoform 3 of E3 ubiquitin-protein ligase TRIM41 OS=Homo sapiens GN=TRIM41;>sp|Q8WV44|TRI41_HUMAN E3 ubiquitin-protein ligase TRIM41 OS=H	3	1	1	1	1	1	1	0	0	1	1	0	0	0	0	1	1	1	1	0	0	1	1	0	0	0	0	1	1	1	1	0	0	1	1	0	0	0	0	1	5.4	5.4
F8WD00;Q9BVJ6-2;E9PEL7;Q9BVJ6;Q5TAP6	F8WD00;Q9BVJ6-2;E9PEL7;Q9BVJ6	4;4;4;4;1	4;4;4;4;1	4;4;4;4;1	U3 small nucleolar RNA-associated protein 14 homolog A	UTP14A	>tr|F8WD00|F8WD00_HUMAN U3 small nucleolar RNA-associated protein 14 homolog A OS=Homo sapiens GN=UTP14A PE=4 SV=1;>sp|Q9BVJ6-2|UT14A_HUMAN Isoform 2 of U3 small nucleolar RNA-associated protein 14 homolog A OS=Homo sapiens GN=UTP14A;>tr|E9PEL7|E9PEL7_HUMA	5	4	4	4	4	3	4	4	3	4	4	4	1	4	4	4	4	3	4	4	3	4	4	4	1	4	4	4	4	3	4	4	3	4	4	4	1	4	4	4	7.1	7.1
E9PEP5;Q59G05;Q9BWT3	E9PEP5;Q59G05;Q9BWT3	2;2;2	2;2;2	2;2;2	Poly(A) polymerase gamma	PAPOLG	>tr|E9PEP5|E9PEP5_HUMAN Poly(A) polymerase gamma OS=Homo sapiens GN=PAPOLG PE=4 SV=1;>tr|Q59G05|Q59G05_HUMAN Poly(A) polymerase gamma (Fragment) OS=Homo sapiens GN=PAPOLG PE=2 SV=1;>sp|Q9BWT3|PAPOG_HUMAN Poly(A) polymerase gamma OS=Homo sapiens GN=PAPOLG P	3	2	2	2	0	0	1	0	0	1	0	0	0	0	0	0	0	0	1	0	0	1	0	0	0	0	0	0	0	0	1	0	0	1	0	0	0	0	0	0	6.5	6.5
E9PEP6;O14786;E7EX60;Q5T7F0;Q5JWQ6;Q5T7F1;O14786-2;E9PHT5;Q5JWQ4	E9PEP6;O14786;E7EX60;Q5T7F0;Q5JWQ6;Q5T7F1;O14786-2	4;4;3;3;3;3;3;1;1	4;4;3;3;3;3;3;1;1	4;4;3;3;3;3;3;1;1	Neuropilin-1	NRP1	>tr|E9PEP6|E9PEP6_HUMAN Neuropilin-1 OS=Homo sapiens GN=NRP1 PE=4 SV=2;>sp|O14786|NRP1_HUMAN Neuropilin-1 OS=Homo sapiens GN=NRP1 PE=1 SV=3;>tr|E7EX60|E7EX60_HUMAN Neuropilin-1 OS=Homo sapiens GN=NRP1 PE=4 SV=1;>tr|Q5T7F0|Q5T7F0_HUMAN Neuropilin 1 OS=Homo	9	4	4	4	2	4	3	1	3	2	0	3	2	4	2	3	2	4	3	1	3	2	0	3	2	4	2	3	2	4	3	1	3	2	0	3	2	4	2	3	7.2	7.2
E9PET0;Q8WV24	E9PET0;Q8WV24	4;4	4;4	4;4	Pleckstrin homology-like domain family A member 1	PHLDA1	>tr|E9PET0|E9PET0_HUMAN Pleckstrin homology-like domain family A member 1 OS=Homo sapiens GN=PHLDA1 PE=4 SV=1;>sp|Q8WV24|PHLA1_HUMAN Pleckstrin homology-like domain family A member 1 OS=Homo sapiens GN=PHLDA1 PE=1 SV=4	2	4	4	4	2	1	2	1	4	3	4	3	2	2	1	2	2	1	2	1	4	3	4	3	2	2	1	2	2	1	2	1	4	3	4	3	2	2	1	2	9.1	9.1
E9PF55	E9PF55	67	1	1		TNS1	>tr|E9PF55|E9PF55_HUMAN Tensin-1 OS=Homo sapiens GN=TNS1 PE=4 SV=1	1	67	1	1	56	53	63	52	54	46	48	56	49	49	39	47	0	0	1	0	1	0	0	1	0	0	0	0	0	0	1	0	1	0	0	1	0	0	0	0	57.6	0.5
E9PF74;Q9HC21	E9PF74;Q9HC21	4;4	4;4	4;4	Mitochondrial thiamine pyrophosphate carrier	SLC25A19	>tr|E9PF74|E9PF74_HUMAN Mitochondrial thiamine pyrophosphate carrier OS=Homo sapiens GN=SLC25A19 PE=3 SV=1;>sp|Q9HC21|TPC_HUMAN Mitochondrial thiamine pyrophosphate carrier OS=Homo sapiens GN=SLC25A19 PE=1 SV=1	2	4	4	4	0	1	0	1	2	0	1	1	2	2	2	3	0	1	0	1	2	0	1	1	2	2	2	3	0	1	0	1	2	0	1	1	2	2	2	3	14.8	14.8
E9PFA9;Q86Y07-4;Q86Y07-5;Q86Y07-2;Q86Y07-3;Q86Y07	E9PFA9;Q86Y07-4;Q86Y07-5;Q86Y07-2;Q86Y07-3;Q86Y07	1;1;1;1;1;1	1;1;1;1;1;1	1;1;1;1;1;1	Serine/threonine-protein kinase VRK2	VRK2	>tr|E9PFA9|E9PFA9_HUMAN Serine/threonine-protein kinase VRK2 OS=Homo sapiens GN=VRK2 PE=4 SV=1;>sp|Q86Y07-4|VRK2_HUMAN Isoform 4 of Serine/threonine-protein kinase VRK2 OS=Homo sapiens GN=VRK2;>sp|Q86Y07-5|VRK2_HUMAN Isoform 5 of Serine/threonine-protein k	6	1	1	1	0	0	0	0	0	0	0	1	0	0	0	0	0	0	0	0	0	0	0	1	0	0	0	0	0	0	0	0	0	0	0	1	0	0	0	0	4.2	4.2
E9PFH8;P05455;E9PFL9;E7ERC4;E9PGX9	E9PFH8;P05455;E9PFL9;E7ERC4	6;6;3;3;2	6;6;3;3;2	6;6;3;3;2	Lupus La protein	SSB	>tr|E9PFH8|E9PFH8_HUMAN Lupus La protein OS=Homo sapiens GN=SSB PE=4 SV=1;>sp|P05455|LA_HUMAN Lupus La protein OS=Homo sapiens GN=SSB PE=1 SV=2;>tr|E9PFL9|E9PFL9_HUMAN Lupus La protein OS=Homo sapiens GN=SSB PE=4 SV=1;>tr|E7ERC4|E7ERC4_HUMAN Lupus La prote	5	6	6	6	4	5	4	4	0	1	1	3	2	4	5	4	4	5	4	4	0	1	1	3	2	4	5	4	4	5	4	4	0	1	1	3	2	4	5	4	24.1	24.1
E9PFP2;O43719;Q5H918;Q5H919	E9PFP2;O43719	32;32;15;14	32;32;15;14	32;32;15;14	HIV Tat-specific factor 1	HTATSF1	>tr|E9PFP2|E9PFP2_HUMAN HIV Tat-specific factor 1 OS=Homo sapiens GN=HTATSF1 PE=4 SV=2;>sp|O43719|HTSF1_HUMAN HIV Tat-specific factor 1 OS=Homo sapiens GN=HTATSF1 PE=1 SV=1	4	32	32	32	24	23	28	20	22	25	27	23	24	28	24	26	24	23	28	20	22	25	27	23	24	28	24	26	24	23	28	20	22	25	27	23	24	28	24	26	46.9	46.9
H0Y6F5;E9PG50;Q9H4I2;F5H820	H0Y6F5;E9PG50;Q9H4I2;F5H820	2;2;2;1	2;2;2;1	2;2;2;1	Zinc fingers and homeoboxes protein 3	ZHX3	>tr|H0Y6F5|H0Y6F5_HUMAN Zinc fingers and homeoboxes protein 3 (Fragment) OS=Homo sapiens GN=ZHX3 PE=3 SV=1;>tr|E9PG50|E9PG50_HUMAN Zinc fingers and homeoboxes protein 3 OS=Homo sapiens GN=ZHX3 PE=3 SV=1;>sp|Q9H4I2|ZHX3_HUMAN Zinc fingers and homeoboxes pro	4	2	2	2	0	0	1	0	0	1	1	1	1	1	0	1	0	0	1	0	0	1	1	1	1	1	0	1	0	0	1	0	0	1	1	1	1	1	0	1	6.3	6.3
Q12873;E9PG89;I3L229;H7C3H7;H7C0J3;Q5TG85;F5H2G1;F5GWX5;Q14839;Q14839-2;Q8TDI0;Q12873-2	Q12873;E9PG89;I3L229;H7C3H7;H7C0J3;Q5TG85;F5H2G1;F5GWX5;Q14839;Q14839-2;Q8TDI0;Q12873-2	2;2;1;1;1;1;1;1;1;1;1;1	2;2;1;1;1;1;1;1;1;1;1;1	2;2;1;1;1;1;1;1;1;1;1;1	Chromodomain-helicase-DNA-binding protein 3;Chromodomain-helicase-DNA-binding protein 4;Chromodomain-helicase-DNA-binding protein 5	CHD3;CHD4;CHD5	>sp|Q12873|CHD3_HUMAN Chromodomain-helicase-DNA-binding protein 3 OS=Homo sapiens GN=CHD3 PE=1 SV=3;>tr|E9PG89|E9PG89_HUMAN Chromodomain-helicase-DNA-binding protein 3 OS=Homo sapiens GN=CHD3 PE=4 SV=1;>tr|I3L229|I3L229_HUMAN Chromodomain-helicase-DNA-bind	12	2	2	2	0	1	1	0	0	0	0	0	0	0	1	1	0	1	1	0	0	0	0	0	0	0	1	1	0	1	1	0	0	0	0	0	0	0	1	1	1.8	1.8
E9PGB5;Q6P4A7;F2Z386;H7BYJ7;Q6P4A7-3;Q6P4A7-2	E9PGB5;Q6P4A7;F2Z386;H7BYJ7;Q6P4A7-3;Q6P4A7-2	2;2;1;1;1;1	2;2;1;1;1;1	2;2;1;1;1;1	Sideroflexin-4	SFXN4	>tr|E9PGB5|E9PGB5_HUMAN Sideroflexin-4 OS=Homo sapiens GN=SFXN4 PE=4 SV=1;>sp|Q6P4A7|SFXN4_HUMAN Sideroflexin-4 OS=Homo sapiens GN=SFXN4 PE=1 SV=1;>tr|F2Z386|F2Z386_HUMAN Sideroflexin-4 OS=Homo sapiens GN=SFXN4 PE=4 SV=1;>tr|H7BYJ7|H7BYJ7_HUMAN Sideroflexi	6	2	2	2	2	1	0	0	1	1	1	2	2	1	1	1	2	1	0	0	1	1	1	2	2	1	1	1	2	1	0	0	1	1	1	2	2	1	1	1	7.9	7.9
E9PGF5;Q9HBL0;Q59G71;C9JI43;H7C3Z4;B3KYA3;F5GXX8;E7ERH3;Q68CZ2-2;Q68CZ2	E9PGF5;Q9HBL0;Q59G71	68;67;45;2;2;2;2;2;2;2	68;67;45;2;2;2;2;2;2;2	2;1;2;0;0;0;0;0;0;0	Tensin-1	TNS1	>tr|E9PGF5|E9PGF5_HUMAN Tensin-1 OS=Homo sapiens GN=TNS1 PE=4 SV=1;>sp|Q9HBL0|TENS1_HUMAN Tensin-1 OS=Homo sapiens GN=TNS1 PE=1 SV=2;>tr|Q59G71|Q59G71_HUMAN Tensin variant (Fragment) OS=Homo sapiens GN=TNS1 PE=2 SV=1	10	68	68	2	58	55	64	54	55	48	50	57	50	51	41	49	58	55	64	54	55	48	50	57	50	51	41	49	2	2	2	2	2	2	2	2	1	2	2	2	59.3	59.3
E9PGF6;Q86SQ0-2;Q86SQ0-3;Q86SQ0;G8JLD7;E9PFQ4	E9PGF6;Q86SQ0-2;Q86SQ0-3;Q86SQ0;G8JLD7;E9PFQ4	4;4;4;4;3;3	4;4;4;4;3;3	4;4;4;4;3;3	Pleckstrin homology-like domain family B member 2	PHLDB2	>tr|E9PGF6|E9PGF6_HUMAN Pleckstrin homology-like domain family B member 2 OS=Homo sapiens GN=PHLDB2 PE=4 SV=1;>sp|Q86SQ0-2|PHLB2_HUMAN Isoform 2 of Pleckstrin homology-like domain family B member 2 OS=Homo sapiens GN=PHLDB2;>sp|Q86SQ0-3|PHLB2_HUMAN Isoform	6	4	4	4	2	0	2	1	2	1	1	3	2	2	3	2	2	0	2	1	2	1	1	3	2	2	3	2	2	0	2	1	2	1	1	3	2	2	3	2	5.5	5.5
E9PGT0;P49792;F8WBP7	E9PGT0;P49792	11;11;1	11;11;1	6;6;1	E3 SUMO-protein ligase RanBP2	RANBP2	>tr|E9PGT0|E9PGT0_HUMAN Putative peptidyl-prolyl cis-trans isomerase OS=Homo sapiens GN=RANBP2 PE=4 SV=1;>sp|P49792|RBP2_HUMAN E3 SUMO-protein ligase RanBP2 OS=Homo sapiens GN=RANBP2 PE=1 SV=2	3	11	11	6	7	8	8	7	3	5	7	9	5	8	9	9	7	8	8	7	3	5	7	9	5	8	9	9	3	4	4	4	1	2	3	5	2	4	5	4	6.5	6.5
E9PH29;P30048	E9PH29;P30048	3;3	3;3	3;3	Thioredoxin-dependent peroxide reductase, mitochondrial	PRDX3	>tr|E9PH29|E9PH29_HUMAN Thioredoxin-dependent peroxide reductase, mitochondrial OS=Homo sapiens GN=PRDX3 PE=4 SV=1;>sp|P30048|PRDX3_HUMAN Thioredoxin-dependent peroxide reductase, mitochondrial OS=Homo sapiens GN=PRDX3 PE=1 SV=3	2	3	3	3	0	0	0	0	0	0	0	2	0	1	0	0	0	0	0	0	0	0	0	2	0	1	0	0	0	0	0	0	0	0	0	2	0	1	0	0	22.7	22.7
F5H308;E9PH51;P00338-4;P00338;P00338-3;P00338-5;P00338-2;F5H8H6;F5GXC7;F5GWW2;F5GXU1;F5GZQ4;F5H5J4;F5H6W8;F5GXH2;F5GYU2;F5GXY2	F5H308;E9PH51;P00338-4;P00338;P00338-3;P00338-5;P00338-2	3;3;3;3;3;2;2;1;1;1;1;1;1;1;1;1;1	2;2;2;2;2;1;1;1;1;1;1;1;1;1;1;1;1	2;2;2;2;2;1;1;1;1;1;1;1;1;1;1;1;1	L-lactate dehydrogenase A chain	LDHA	>tr|F5H308|F5H308_HUMAN L-lactate dehydrogenase OS=Homo sapiens GN=LDHA PE=3 SV=1;>tr|E9PH51|E9PH51_HUMAN L-lactate dehydrogenase OS=Homo sapiens GN=LDHA PE=3 SV=2;>sp|P00338-4|LDHA_HUMAN Isoform 4 of L-lactate dehydrogenase A chain OS=Homo sapiens GN=LDHA	17	3	2	2	1	2	3	2	2	2	2	2	1	2	2	2	0	1	2	1	1	1	1	1	0	1	1	1	0	1	2	1	1	1	1	1	0	1	1	1	10.2	6.2
E9PHP9;O15265;O15265-2	E9PHP9;O15265;O15265-2	4;4;3	4;4;3	4;4;3	Ataxin-7	ATXN7	>tr|E9PHP9|E9PHP9_HUMAN Ataxin-7 OS=Homo sapiens GN=ATXN7 PE=4 SV=1;>sp|O15265|ATX7_HUMAN Ataxin-7 OS=Homo sapiens GN=ATXN7 PE=1 SV=1;>sp|O15265-2|ATX7_HUMAN Isoform b of Ataxin-7 OS=Homo sapiens GN=ATXN7	3	4	4	4	3	2	3	3	3	2	3	4	2	3	2	2	3	2	3	3	3	2	3	4	2	3	2	2	3	2	3	3	3	2	3	4	2	3	2	2	5.4	5.4
F5H1V8;G5E9I6;E9PHR3;Q15555;Q15555-2;C9JB30;Q9UPY8-2;Q9UPY8	F5H1V8;G5E9I6;E9PHR3;Q15555;Q15555-2	5;5;5;5;3;1;1;1	5;5;5;5;3;1;1;1	5;5;5;5;3;1;1;1	Microtubule-associated protein RP/EB family member 2	MAPRE2	>tr|F5H1V8|F5H1V8_HUMAN Microtubule-associated protein RP/EB family member 2 OS=Homo sapiens GN=MAPRE2 PE=4 SV=1;>tr|G5E9I6|G5E9I6_HUMAN Microtubule-associated protein RP/EB family member 2 OS=Homo sapiens GN=MAPRE2 PE=4 SV=1;>tr|E9PHR3|E9PHR3_HUMAN Microt	8	5	5	5	2	3	4	1	5	4	5	4	1	1	0	1	2	3	4	1	5	4	5	4	1	1	0	1	2	3	4	1	5	4	5	4	1	1	0	1	24.5	24.5
E9PRB9;E9PL01;E9PI68;Q15005	E9PRB9;E9PL01;E9PI68;Q15005	1;1;1;1	1;1;1;1	1;1;1;1	Signal peptidase complex subunit 2	SPCS2	>tr|E9PRB9|E9PRB9_HUMAN Signal peptidase complex subunit 2 OS=Homo sapiens GN=SPCS2 PE=4 SV=1;>tr|E9PL01|E9PL01_HUMAN Signal peptidase complex subunit 2 OS=Homo sapiens GN=SPCS2 PE=4 SV=1;>tr|E9PI68|E9PI68_HUMAN Signal peptidase complex subunit 2 OS=Homo s	4	1	1	1	1	0	1	0	1	0	0	1	1	1	1	1	1	0	1	0	1	0	0	1	1	1	1	1	1	0	1	0	1	0	0	1	1	1	1	1	10.3	10.3
E9PI88;O60547	E9PI88;O60547	3;3	3;3	3;3	GDP-mannose 4,6 dehydratase	GMDS	>tr|E9PI88|E9PI88_HUMAN GDP-mannose 4,6 dehydratase OS=Homo sapiens GN=GMDS PE=4 SV=1;>sp|O60547|GMDS_HUMAN GDP-mannose 4,6 dehydratase OS=Homo sapiens GN=GMDS PE=1 SV=1	2	3	3	3	1	1	3	2	1	1	1	2	0	0	1	1	1	1	3	2	1	1	1	2	0	0	1	1	1	1	3	2	1	1	1	2	0	0	1	1	10.8	10.8
E9PMJ3;E9PLZ3;E9PIM9;P13489	E9PMJ3;E9PLZ3;E9PIM9;P13489	1;1;1;1	1;1;1;1	1;1;1;1	Ribonuclease inhibitor	RNH1	>tr|E9PMJ3|E9PMJ3_HUMAN Ribonuclease inhibitor (Fragment) OS=Homo sapiens GN=RNH1 PE=4 SV=1;>tr|E9PLZ3|E9PLZ3_HUMAN Ribonuclease inhibitor (Fragment) OS=Homo sapiens GN=RNH1 PE=4 SV=1;>tr|E9PIM9|E9PIM9_HUMAN Ribonuclease inhibitor (Fragment) OS=Homo sapien	4	1	1	1	0	0	0	1	0	0	0	0	0	1	0	0	0	0	0	1	0	0	0	0	0	1	0	0	0	0	0	1	0	0	0	0	0	1	0	0	7.9	7.9
E9PJ04	E9PJ04	22	1	0		SF3B2	>tr|E9PJ04|E9PJ04_HUMAN Splicing factor 3B subunit 2 (Fragment) OS=Homo sapiens GN=SF3B2 PE=4 SV=1	1	22	1	0	22	21	18	16	18	21	18	19	20	18	19	20	1	1	1	0	0	0	0	1	0	0	0	1	0	0	0	0	0	0	0	0	0	0	0	0	65.8	4.8
E9PJ42;E9PP29;Q5BJD5-2;Q5BJD5	E9PJ42;E9PP29;Q5BJD5-2;Q5BJD5	2;2;2;2	2;2;2;2	2;2;2;2	Transmembrane protein 41B	TMEM41B	>tr|E9PJ42|E9PJ42_HUMAN Transmembrane protein 41B OS=Homo sapiens GN=TMEM41B PE=4 SV=1;>tr|E9PP29|E9PP29_HUMAN Transmembrane protein 41B OS=Homo sapiens GN=TMEM41B PE=4 SV=1;>sp|Q5BJD5-2|TM41B_HUMAN Isoform 2 of Transmembrane protein 41B OS=Homo sapiens GN	4	2	2	2	1	1	1	1	2	2	1	1	1	1	1	1	1	1	1	1	2	2	1	1	1	1	1	1	1	1	1	1	2	2	1	1	1	1	1	1	14.3	14.3
E9PJA7;E9PK09;E9PQN2;E9PKI6;E9PK91;Q9NYF8-4;Q9NYF8-3;Q9NYF8-2;Q9NYF8;H0YF00	E9PJA7;E9PK09;E9PQN2;E9PKI6;E9PK91;Q9NYF8-4;Q9NYF8-3;Q9NYF8-2;Q9NYF8;H0YF00	2;2;2;2;2;2;2;2;2;1	2;2;2;2;2;2;2;2;2;1	2;2;2;2;2;2;2;2;2;1	Bcl-2-associated transcription factor 1	BCLAF1	>tr|E9PJA7|E9PJA7_HUMAN Bcl-2-associated transcription factor 1 OS=Homo sapiens GN=BCLAF1 PE=4 SV=1;>tr|E9PK09|E9PK09_HUMAN Bcl-2-associated transcription factor 1 (Fragment) OS=Homo sapiens GN=BCLAF1 PE=4 SV=1;>tr|E9PQN2|E9PQN2_HUMAN Bcl-2-associated tran	10	2	2	2	1	1	1	1	0	0	1	0	0	1	0	0	1	1	1	1	0	0	1	0	0	1	0	0	1	1	1	1	0	0	1	0	0	1	0	0	6.9	6.9
E9PJE2;Q9UQC2-2;Q9UQC2	E9PJE2;Q9UQC2-2;Q9UQC2	1;1;1	1;1;1	1;1;1	GRB2-associated-binding protein 2	GAB2	>tr|E9PJE2|E9PJE2_HUMAN GRB2-associated-binding protein 2 (Fragment) OS=Homo sapiens GN=GAB2 PE=4 SV=1;>sp|Q9UQC2-2|GAB2_HUMAN Isoform 2 of GRB2-associated-binding protein 2 OS=Homo sapiens GN=GAB2;>sp|Q9UQC2|GAB2_HUMAN GRB2-associated-binding protein 2 OS	3	1	1	1	0	0	1	0	0	0	0	0	0	0	0	0	0	0	1	0	0	0	0	0	0	0	0	0	0	0	1	0	0	0	0	0	0	0	0	0	11.5	11.5
E9PJF5;H0YCF7;G5E9I4;Q9HCU9;E9PPD1	E9PJF5;H0YCF7;G5E9I4;Q9HCU9	5;5;5;5;1	5;5;5;5;1	5;5;5;5;1	Breast cancer metastasis-suppressor 1	BRMS1	>tr|E9PJF5|E9PJF5_HUMAN Breast cancer metastasis-suppressor 1 (Fragment) OS=Homo sapiens GN=BRMS1 PE=4 SV=1;>tr|H0YCF7|H0YCF7_HUMAN Breast cancer metastasis-suppressor 1 (Fragment) OS=Homo sapiens GN=BRMS1 PE=4 SV=1;>tr|G5E9I4|G5E9I4_HUMAN Breast cancer me	5	5	5	5	2	3	2	2	3	3	3	4	3	3	5	4	2	3	2	2	3	3	3	4	3	3	5	4	2	3	2	2	3	3	3	4	3	3	5	4	22.1	22.1
E9PRS4;E9PS12;E9PJL7;E9PRA8;E9PR44;P02511	E9PRS4;E9PS12;E9PJL7;E9PRA8;E9PR44;P02511	2;2;2;2;2;2	2;2;2;2;2;2	2;2;2;2;2;2	Alpha-crystallin B chain	CRYAB	>tr|E9PRS4|E9PRS4_HUMAN Alpha-crystallin B chain (Fragment) OS=Homo sapiens GN=CRYAB PE=4 SV=1;>tr|E9PS12|E9PS12_HUMAN Alpha-crystallin B chain (Fragment) OS=Homo sapiens GN=CRYAB PE=4 SV=1;>tr|E9PJL7|E9PJL7_HUMAN Alpha-crystallin B chain (Fragment) OS=Hom	6	2	2	2	0	1	0	1	1	1	1	1	0	0	0	0	0	1	0	1	1	1	1	1	0	0	0	0	0	1	0	1	1	1	1	1	0	0	0	0	34.8	34.8
E9PK01;P29692;E9PRY8;P29692-2;P29692-3;E9PPR1;E9PL12;E9PQ49;E9PI39;F8W934;E9PBQ9;E9PMW7;E9PQZ1;E9PIZ1;E9PL71;H0YCK7;E9PN91;E9PK06;E9PK72;E9PKK3;E9PQC9;H0YE58;H0YE72;E9PNW6;E9PJD0	E9PK01;P29692;E9PRY8;P29692-2;P29692-3;E9PPR1;E9PL12;E9PQ49;E9PI39;F8W934;E9PBQ9;E9PMW7;E9PQZ1;E9PIZ1;E9PL71;H0YCK7;E9PN91;E9PK06	12;12;11;11;10;9;9;9;9;9;9;8;8;7;7;7;6;6;5;4;3;3;3;2;2	12;12;11;11;10;9;9;9;9;9;9;8;8;7;7;7;6;6;5;4;3;3;3;2;2	12;12;11;11;10;9;9;9;9;9;9;8;8;7;7;7;6;6;5;4;3;3;3;2;2	Elongation factor 1-delta	EEF1D	>tr|E9PK01|E9PK01_HUMAN Elongation factor 1-delta (Fragment) OS=Homo sapiens GN=EEF1D PE=3 SV=1;>sp|P29692|EF1D_HUMAN Elongation factor 1-delta OS=Homo sapiens GN=EEF1D PE=1 SV=5;>tr|E9PRY8|E9PRY8_HUMAN Elongation factor 1-delta OS=Homo sapiens GN=EEF1D PE	25	12	12	12	8	10	7	8	9	8	8	8	11	9	9	9	8	10	7	8	9	8	8	8	11	9	9	9	8	10	7	8	9	8	8	8	11	9	9	9	48.3	48.3
E9PK89;Q8TBN0;Q8TBN0-2	E9PK89;Q8TBN0	3;3;1	3;3;1	3;3;1	Guanine nucleotide exchange factor for Rab-3A	RAB3IL1	>tr|E9PK89|E9PK89_HUMAN Guanine nucleotide exchange factor for Rab-3A (Fragment) OS=Homo sapiens GN=RAB3IL1 PE=4 SV=1;>sp|Q8TBN0|R3GEF_HUMAN Guanine nucleotide exchange factor for Rab-3A OS=Homo sapiens GN=RAB3IL1 PE=1 SV=1	3	3	3	3	0	0	2	1	0	0	1	1	0	0	0	1	0	0	2	1	0	0	1	1	0	0	0	1	0	0	2	1	0	0	1	1	0	0	0	1	14.4	14.4
E9PK95;F8VZR5;F8VNP5;P28702;Q5STQ1;H0Y4M4	E9PK95;F8VZR5;F8VNP5;P28702;Q5STQ1	7;7;7;7;7;3	7;7;7;7;7;3	3;3;3;3;3;1	Retinoic acid receptor RXR-beta	RXRB	>tr|E9PK95|E9PK95_HUMAN Retinoic acid receptor RXR-beta OS=Homo sapiens GN=RXRB PE=3 SV=1;>tr|F8VZR5|F8VZR5_HUMAN Retinoic acid receptor RXR-beta OS=Homo sapiens GN=RXRB PE=3 SV=1;>tr|F8VNP5|F8VNP5_HUMAN Retinoic acid receptor RXR-beta OS=Homo sapiens GN=R	6	7	7	3	3	5	6	4	5	5	6	5	4	6	3	5	3	5	6	4	5	5	6	5	4	6	3	5	3	3	3	3	3	3	3	3	2	3	2	2	25.9	25.9
H0YDE2;E9PKC0;Q6IQ23;Q6IQ23-2;Q6IQ23-3;E9PL74	H0YDE2;E9PKC0;Q6IQ23;Q6IQ23-2;Q6IQ23-3;E9PL74	5;5;5;5;4;3	5;5;5;5;4;3	5;5;5;5;4;3	Pleckstrin homology domain-containing family A member 7	PLEKHA7	>tr|H0YDE2|H0YDE2_HUMAN Pleckstrin homology domain-containing family A member 7 (Fragment) OS=Homo sapiens GN=PLEKHA7 PE=4 SV=1;>tr|E9PKC0|E9PKC0_HUMAN Pleckstrin homology domain-containing family A member 7 OS=Homo sapiens GN=PLEKHA7 PE=4 SV=1;>sp|Q6IQ23|	6	5	5	5	1	0	2	1	3	4	3	3	1	2	0	1	1	0	2	1	3	4	3	3	1	2	0	1	1	0	2	1	3	4	3	3	1	2	0	1	6.2	6.2
E9PKD5;E9PM69;P17980;E9PN50;E9PMD8	E9PKD5;E9PM69;P17980;E9PN50;E9PMD8	2;2;2;1;1	2;2;2;1;1	2;2;2;1;1	26S protease regulatory subunit 6A	PSMC3	>tr|E9PKD5|E9PKD5_HUMAN 26S protease regulatory subunit 6A (Fragment) OS=Homo sapiens GN=PSMC3 PE=3 SV=1;>tr|E9PM69|E9PM69_HUMAN 26S protease regulatory subunit 6A OS=Homo sapiens GN=PSMC3 PE=3 SV=1;>sp|P17980|PRS6A_HUMAN 26S protease regulatory subunit 6A	5	2	2	2	0	0	1	1	1	0	1	1	0	0	1	1	0	0	1	1	1	0	1	1	0	0	1	1	0	0	1	1	1	0	1	1	0	0	1	1	8.8	8.8
E9PN51;F8W9K7;E9PKH6;E9PPW7;O00217	E9PN51;F8W9K7;E9PKH6;E9PPW7;O00217	3;3;3;3;3	3;3;3;3;3	3;3;3;3;3	NADH dehydrogenase [ubiquinone] iron-sulfur protein 8, mitochondrial	NDUFS8	>tr|E9PN51|E9PN51_HUMAN NADH dehydrogenase [ubiquinone] iron-sulfur protein 8, mitochondrial (Fragment) OS=Homo sapiens GN=NDUFS8 PE=4 SV=1;>tr|F8W9K7|F8W9K7_HUMAN NADH dehydrogenase [ubiquinone] iron-sulfur protein 8, mitochondrial (Fragment) OS=Homo sapi	5	3	3	3	2	2	3	2	2	2	3	2	1	2	2	0	2	2	3	2	2	2	3	2	1	2	2	0	2	2	3	2	2	2	3	2	1	2	2	0	28.2	28.2
E9PNX5;E9PKK8;E9PQ14;E9PPK9;F5GXD5;G3V1D3;G3V180;Q9NY33-2;F5H8L6;Q9NY33	E9PNX5;E9PKK8;E9PQ14;E9PPK9;F5GXD5;G3V1D3;G3V180;Q9NY33-2;F5H8L6;Q9NY33	1;1;1;1;1;1;1;1;1;1	1;1;1;1;1;1;1;1;1;1	1;1;1;1;1;1;1;1;1;1	Dipeptidyl peptidase 3	DPP3	>tr|E9PNX5|E9PNX5_HUMAN Dipeptidyl peptidase 3 (Fragment) OS=Homo sapiens GN=DPP3 PE=4 SV=1;>tr|E9PKK8|E9PKK8_HUMAN Dipeptidyl peptidase 3 (Fragment) OS=Homo sapiens GN=DPP3 PE=4 SV=1;>tr|E9PQ14|E9PQ14_HUMAN Dipeptidyl peptidase 3 (Fragment) OS=Homo sapien	10	1	1	1	0	0	0	0	0	0	0	0	0	0	1	0	0	0	0	0	0	0	0	0	0	0	1	0	0	0	0	0	0	0	0	0	0	0	1	0	15.4	15.4
E9PKV2;Q9NRX2	E9PKV2;Q9NRX2	2;2	2;2	2;2	39S ribosomal protein L17, mitochondrial	MRPL17	>tr|E9PKV2|E9PKV2_HUMAN 39S ribosomal protein L17, mitochondrial (Fragment) OS=Homo sapiens GN=MRPL17 PE=4 SV=1;>sp|Q9NRX2|RM17_HUMAN 39S ribosomal protein L17, mitochondrial OS=Homo sapiens GN=MRPL17 PE=1 SV=1	2	2	2	2	2	2	2	2	1	1	0	1	1	1	0	1	2	2	2	2	1	1	0	1	1	1	0	1	2	2	2	2	1	1	0	1	1	1	0	1	16.9	16.9
E9PKW1;Q9NS15-2;Q9NS15;E9PJR2;F5GWC4;H0YC99	E9PKW1;Q9NS15-2;Q9NS15;E9PJR2;F5GWC4;H0YC99	2;2;2;1;1;1	2;2;2;1;1;1	2;2;2;1;1;1	Latent-transforming growth factor beta-binding protein 3	LTBP3	>tr|E9PKW1|E9PKW1_HUMAN Latent-transforming growth factor beta-binding protein 3 (Fragment) OS=Homo sapiens GN=LTBP3 PE=4 SV=1;>sp|Q9NS15-2|LTBP3_HUMAN Isoform 2 of Latent-transforming growth factor beta-binding protein 3 OS=Homo sapiens GN=LTBP3;>sp|Q9NS1	6	2	2	2	0	0	0	0	1	1	1	0	2	1	2	1	0	0	0	0	1	1	1	0	2	1	2	1	0	0	0	0	1	1	1	0	2	1	2	1	2.6	2.6
E9PLD3;E9PRG8	E9PLD3;E9PRG8	1;1	1;1	1;1		LOC102288414	>tr|E9PLD3|E9PLD3_HUMAN Uncharacterized protein OS=Homo sapiens PE=4 SV=1;>tr|E9PRG8|E9PRG8_HUMAN Uncharacterized protein C11orf48 OS=Homo sapiens GN=C11orf48 PE=4 SV=1	2	1	1	1	1	1	1	1	1	1	1	1	1	1	1	1	1	1	1	1	1	1	1	1	1	1	1	1	1	1	1	1	1	1	1	1	1	1	1	1	13.1	13.1
E9PLL6;P46776;E9PJD9;E9PLX7	E9PLL6;P46776;E9PJD9	6;6;4;1	6;6;4;1	6;6;4;1	60S ribosomal protein L27a	RPL27A	>tr|E9PLL6|E9PLL6_HUMAN 60S ribosomal protein L27a OS=Homo sapiens GN=RPL27A PE=3 SV=1;>sp|P46776|RL27A_HUMAN 60S ribosomal protein L27a OS=Homo sapiens GN=RPL27A PE=1 SV=2;>tr|E9PJD9|E9PJD9_HUMAN 60S ribosomal protein L27a OS=Homo sapiens GN=RPL27A PE=3 S	4	6	6	6	6	5	6	4	6	5	6	6	6	5	5	6	6	5	6	4	6	5	6	6	6	5	5	6	6	5	6	4	6	5	6	6	6	5	5	6	42.6	42.6
I3L3B4;F8W9H0;E9PLN8;Q9BQB6-3;Q9BQB6-2;Q9BQB6	I3L3B4;F8W9H0;E9PLN8;Q9BQB6-3;Q9BQB6-2;Q9BQB6	2;2;2;2;2;2	2;2;2;2;2;2	2;2;2;2;2;2	Vitamin K epoxide reductase complex subunit 1	VKORC1	>tr|I3L3B4|I3L3B4_HUMAN Uncharacterized protein (Fragment) OS=Homo sapiens PE=4 SV=1;>tr|F8W9H0|F8W9H0_HUMAN Vitamin K epoxide reductase complex subunit 1 OS=Homo sapiens GN=VKORC1 PE=4 SV=1;>tr|E9PLN8|E9PLN8_HUMAN Uncharacterized protein (Fragment) OS=Hom	6	2	2	2	2	1	2	0	2	2	2	2	2	1	0	2	2	1	2	0	2	2	2	2	2	1	0	2	2	1	2	0	2	2	2	2	2	1	0	2	23.1	23.1
E9PM19;P29597;F5H7K8;E9PPF2;H0YE41;E9PQM4;P23458	E9PM19;P29597;F5H7K8;E9PPF2	20;20;19;15;6;3;1	20;20;19;15;6;3;1	20;20;19;15;6;3;1	Tyrosine-protein kinase;Non-receptor tyrosine-protein kinase TYK2	TYK2	>tr|E9PM19|E9PM19_HUMAN Tyrosine-protein kinase OS=Homo sapiens GN=TYK2 PE=3 SV=1;>sp|P29597|TYK2_HUMAN Non-receptor tyrosine-protein kinase TYK2 OS=Homo sapiens GN=TYK2 PE=1 SV=3;>tr|F5H7K8|F5H7K8_HUMAN Tyrosine-protein kinase OS=Homo sapiens GN=TYK2 PE=3	7	20	20	20	9	11	9	5	11	12	13	18	10	8	9	9	9	11	9	5	11	12	13	18	10	8	9	9	9	11	9	5	11	12	13	18	10	8	9	9	25.9	25.9
E9PML2;Q96CM3;E9PJV3	E9PML2;Q96CM3	3;3;1	3;3;1	3;3;1	RNA pseudouridylate synthase domain-containing protein 4	RPUSD4	>tr|E9PML2|E9PML2_HUMAN RNA pseudouridylate synthase domain-containing protein 4 OS=Homo sapiens GN=RPUSD4 PE=3 SV=1;>sp|Q96CM3|RUSD4_HUMAN RNA pseudouridylate synthase domain-containing protein 4 OS=Homo sapiens GN=RPUSD4 PE=2 SV=1	3	3	3	3	2	2	1	1	1	1	2	1	1	1	1	0	2	2	1	1	1	1	2	1	1	1	1	0	2	2	1	1	1	1	2	1	1	1	1	0	9.5	9.5
E9PN17;O75964	E9PN17;O75964	3;3	3;3	3;3	ATP synthase subunit g, mitochondrial	ATP5L	>tr|E9PN17|E9PN17_HUMAN ATP synthase subunit g, mitochondrial OS=Homo sapiens GN=ATP5L PE=4 SV=1;>sp|O75964|ATP5L_HUMAN ATP synthase subunit g, mitochondrial OS=Homo sapiens GN=ATP5L PE=1 SV=3	2	3	3	3	2	1	2	1	3	2	2	1	2	1	3	2	2	1	2	1	3	2	2	1	2	1	3	2	2	1	2	1	3	2	2	1	2	1	3	2	51.3	51.3
E9PP50;P23528;G3V1A4;E9PK25;E9PLJ3;E9PS23;E9PQB7;G3V5P4;Q9Y281	E9PP50;P23528;G3V1A4;E9PK25	3;3;2;2;1;1;1;1;1	3;3;2;2;1;1;1;1;1	3;3;2;2;1;1;1;1;1	Cofilin-1	CFL1	>tr|E9PP50|E9PP50_HUMAN Cofilin-1 (Fragment) OS=Homo sapiens GN=CFL1 PE=4 SV=1;>sp|P23528|COF1_HUMAN Cofilin-1 OS=Homo sapiens GN=CFL1 PE=1 SV=3;>tr|G3V1A4|G3V1A4_HUMAN Cofilin 1 (Non-muscle), isoform CRA_a OS=Homo sapiens GN=CFL1 PE=4 SV=1;>tr|E9PK25|E9PK	9	3	3	3	2	2	2	3	2	1	2	2	0	2	1	1	2	2	2	3	2	1	2	2	0	2	1	1	2	2	2	3	2	1	2	2	0	2	1	1	23.1	23.1
E9PR30;P62861	E9PR30;P62861	3;3	3;3	3;3	40S ribosomal protein S30	FAU	>tr|E9PR30|E9PR30_HUMAN 40S ribosomal protein S30 OS=Homo sapiens GN=FAU PE=4 SV=1;>sp|P62861|RS30_HUMAN 40S ribosomal protein S30 OS=Homo sapiens GN=FAU PE=1 SV=1	2	3	3	3	2	3	3	2	2	2	1	3	2	1	1	2	2	3	3	2	2	2	1	3	2	1	1	2	2	3	3	2	2	2	1	3	2	1	1	2	12.2	12.2
E9PRM7;Q96BI1	E9PRM7;Q96BI1	1;1	1;1	1;1	Solute carrier family 22 member 18	SLC22A18	>tr|E9PRM7|E9PRM7_HUMAN Solute carrier family 22 member 18 OS=Homo sapiens GN=SLC22A18 PE=4 SV=1;>sp|Q96BI1|S22AI_HUMAN Solute carrier family 22 member 18 OS=Homo sapiens GN=SLC22A18 PE=1 SV=3	2	1	1	1	1	0	1	1	1	0	1	1	1	1	1	1	1	0	1	1	1	0	1	1	1	1	1	1	1	0	1	1	1	0	1	1	1	1	1	1	3.7	3.7
F5H2V5;E9PS00;Q9Y5Q0;E9PPZ4;E9PQC2;E9PKP8;H0YED5	F5H2V5;E9PS00;Q9Y5Q0	7;7;7;2;2;2;1	5;5;5;2;2;2;1	5;5;5;2;2;2;1	Fatty acid desaturase 3	FADS3	>tr|F5H2V5|F5H2V5_HUMAN Fatty acid desaturase 3 OS=Homo sapiens GN=FADS3 PE=4 SV=1;>tr|E9PS00|E9PS00_HUMAN Fatty acid desaturase 3 OS=Homo sapiens GN=FADS3 PE=4 SV=1;>sp|Q9Y5Q0|FADS3_HUMAN Fatty acid desaturase 3 OS=Homo sapiens GN=FADS3 PE=2 SV=1	7	7	5	5	5	6	7	3	4	4	4	6	5	4	5	4	4	5	5	2	3	3	3	4	4	2	4	3	4	5	5	2	3	3	3	4	4	2	4	3	30.9	20.5
F2Z2E1;F5GZX9;F5GY05;Q96EK7;Q96EK7-2;B4DL34	F2Z2E1;F5GZX9;F5GY05;Q96EK7;Q96EK7-2	39;39;39;39;35;6	39;39;39;39;35;6	39;39;39;39;35;6	Constitutive coactivator of peroxisome proliferator-activated receptor gamma	FAM120B	>tr|F2Z2E1|F2Z2E1_HUMAN Constitutive coactivator of peroxisome proliferator-activated receptor gamma OS=Homo sapiens GN=FAM120B PE=4 SV=1;>tr|F5GZX9|F5GZX9_HUMAN Constitutive coactivator of peroxisome proliferator-activated receptor gamma OS=Homo sapiens G	6	39	39	39	31	29	32	28	34	30	32	33	29	23	23	27	31	29	32	28	34	30	32	33	29	23	23	27	31	29	32	28	34	30	32	33	29	23	23	27	49.4	49.4
F2Z2E2;Q86VI3	F2Z2E2;Q86VI3	7;7	7;7	7;7	Ras GTPase-activating-like protein IQGAP3	IQGAP3	>tr|F2Z2E2|F2Z2E2_HUMAN Ras GTPase-activating-like protein IQGAP3 OS=Homo sapiens GN=IQGAP3 PE=4 SV=1;>sp|Q86VI3|IQGA3_HUMAN Ras GTPase-activating-like protein IQGAP3 OS=Homo sapiens GN=IQGAP3 PE=1 SV=2	2	7	7	7	5	3	6	3	1	2	4	2	1	0	0	2	5	3	6	3	1	2	4	2	1	0	0	2	5	3	6	3	1	2	4	2	1	0	0	2	5	5
H0Y4W2;F2Z2U4;Q9Y4A5-2;Q9Y4A5	H0Y4W2;F2Z2U4;Q9Y4A5-2;Q9Y4A5	5;5;5;5	5;5;5;5	5;5;5;5	Transformation/transcription domain-associated protein	TRRAP	>tr|H0Y4W2|H0Y4W2_HUMAN Transformation/transcription domain-associated protein (Fragment) OS=Homo sapiens GN=TRRAP PE=4 SV=1;>tr|F2Z2U4|F2Z2U4_HUMAN Transformation/transcription domain-associated protein OS=Homo sapiens GN=TRRAP PE=4 SV=2;>sp|Q9Y4A5-2|TRRA	4	5	5	5	2	1	1	0	1	1	2	3	0	2	3	1	2	1	1	0	1	1	2	3	0	2	3	1	2	1	1	0	1	1	2	3	0	2	3	1	1.8	1.8
F2Z2U8;G8JLL9;Q7Z406;Q7Z406-6;Q7Z406-2;F2Z2S7;F2Z2U9;Q7Z406-5;Q7Z406-4	F2Z2U8;G8JLL9;Q7Z406;Q7Z406-6;Q7Z406-2;F2Z2S7;F2Z2U9;Q7Z406-5;Q7Z406-4	5;5;5;5;5;4;4;4;4	2;2;2;2;2;2;2;2;2	2;2;2;2;2;2;2;2;2	Myosin-14	MYH14	>tr|F2Z2U8|F2Z2U8_HUMAN Myosin-14 OS=Homo sapiens GN=MYH14 PE=4 SV=1;>tr|G8JLL9|G8JLL9_HUMAN Myosin-14 OS=Homo sapiens GN=MYH14 PE=4 SV=1;>sp|Q7Z406|MYH14_HUMAN Myosin-14 OS=Homo sapiens GN=MYH14 PE=1 SV=2;>sp|Q7Z406-6|MYH14_HUMAN Isoform 6 of Myosin-14 OS	9	5	2	2	2	2	2	4	0	0	0	1	0	1	1	4	1	1	1	1	0	0	0	0	0	0	0	1	1	1	1	1	0	0	0	0	0	0	0	1	3.4	1.6
F2Z2W7;Q8IZ69;Q8IZ69-2;H7C100;F8WB35;C9K041;H7BZZ4	F2Z2W7;Q8IZ69;Q8IZ69-2	13;13;12;4;3;1;1	13;13;12;4;3;1;1	13;13;12;4;3;1;1	tRNA (uracil-5-)-methyltransferase homolog A	TRMT2A	>tr|F2Z2W7|F2Z2W7_HUMAN tRNA (uracil-5-)-methyltransferase homolog A OS=Homo sapiens GN=TRMT2A PE=4 SV=1;>sp|Q8IZ69|TRM2A_HUMAN tRNA (uracil-5-)-methyltransferase homolog A OS=Homo sapiens GN=TRMT2A PE=1 SV=2;>sp|Q8IZ69-2|TRM2A_HUMAN Isoform 2 of tRNA (ura	7	13	13	13	6	8	6	5	6	5	6	5	7	8	9	5	6	8	6	5	6	5	6	5	7	8	9	5	6	8	6	5	6	5	6	5	7	8	9	5	23.2	23.2
Q4TT34;F2Z2X0;O00746;H0Y6J0;A2IDD0;A2IDC9;H7C2G9	Q4TT34;F2Z2X0;O00746;H0Y6J0;A2IDD0	6;6;6;5;4;2;1	6;6;6;5;4;2;1	6;6;6;5;4;2;1	Nucleoside diphosphate kinase;Nucleoside diphosphate kinase, mitochondrial	NME4	>tr|Q4TT34|Q4TT34_HUMAN Nucleoside diphosphate kinase OS=Homo sapiens GN=NME4 PE=2 SV=1;>tr|F2Z2X0|F2Z2X0_HUMAN Nucleoside diphosphate kinase OS=Homo sapiens GN=NME4 PE=3 SV=1;>sp|O00746|NDKM_HUMAN Nucleoside diphosphate kinase, mitochondrial OS=Homo sapie	7	6	6	6	0	0	0	0	5	4	4	4	0	0	0	0	0	0	0	0	5	4	4	4	0	0	0	0	0	0	0	0	5	4	4	4	0	0	0	0	39.5	39.5
F2Z384;Q96GJ1-3;Q96GJ1-2;Q96GJ1	F2Z384;Q96GJ1-3;Q96GJ1-2;Q96GJ1	8;8;8;8	8;8;8;8	8;8;8;8	tRNA (uracil(54)-C(5))-methyltransferase homolog	TRMT2B	>tr|F2Z384|F2Z384_HUMAN tRNA (uracil(54)-C(5))-methyltransferase homolog OS=Homo sapiens GN=TRMT2B PE=4 SV=1;>sp|Q96GJ1-3|TRM2_HUMAN Isoform 3 of tRNA (uracil(54)-C(5))-methyltransferase homolog OS=Homo sapiens GN=TRMT2B;>sp|Q96GJ1-2|TRM2_HUMAN Isoform 2 o	4	8	8	8	4	4	5	3	6	6	5	8	4	6	5	4	4	4	5	3	6	6	5	8	4	6	5	4	4	4	5	3	6	6	5	8	4	6	5	4	20.9	20.9
G5E9V2;F2Z3A7;Q96DA6	G5E9V2;F2Z3A7;Q96DA6	1;1;1	1;1;1	1;1;1	Mitochondrial import inner membrane translocase subunit TIM14	DNAJC19	>tr|G5E9V2|G5E9V2_HUMAN DnaJ (Hsp40) homolog, subfamily C, member 19, isoform CRA_b OS=Homo sapiens GN=DNAJC19 PE=4 SV=1;>tr|F2Z3A7|F2Z3A7_HUMAN Mitochondrial import inner membrane translocase subunit TIM14 OS=Homo sapiens GN=DNAJC19 PE=4 SV=1;>sp|Q96DA6|T	3	1	1	1	1	0	1	1	0	1	1	1	1	0	1	1	1	0	1	1	0	1	1	1	1	0	1	1	1	0	1	1	0	1	1	1	1	0	1	1	40.4	40.4
F5GWA4	F5GWA4	14	1	1		KCTD10	>tr|F5GWA4|F5GWA4_HUMAN BTB/POZ domain-containing adapter for CUL3-mediated RhoA degradation protein 3 OS=Homo sapiens GN=KCTD10 PE=4 SV=1	1	14	1	1	9	12	9	7	9	8	8	9	7	8	8	8	1	1	1	0	1	1	1	1	1	1	1	1	1	1	1	0	1	1	1	1	1	1	1	1	58.5	5.6
Q8TDJ6-2;Q8TDJ6;F5GWF1	Q8TDJ6-2;Q8TDJ6;F5GWF1	1;1;1	1;1;1	1;1;1	DmX-like protein 2	DMXL2	>sp|Q8TDJ6-2|DMXL2_HUMAN Isoform 2 of DmX-like protein 2 OS=Homo sapiens GN=DMXL2;>sp|Q8TDJ6|DMXL2_HUMAN DmX-like protein 2 OS=Homo sapiens GN=DMXL2 PE=1 SV=2;>tr|F5GWF1|F5GWF1_HUMAN DmX-like protein 2 OS=Homo sapiens GN=DMXL2 PE=4 SV=1	3	1	1	1	0	0	1	1	0	0	0	1	0	0	0	0	0	0	1	1	0	0	0	1	0	0	0	0	0	0	1	1	0	0	0	1	0	0	0	0	0.5	0.5
F5GWP8;C9JK18;C9JKY1;C9JTX4;C9J826;C9JPI2	F5GWP8	52;13;13;12;12;1	52;13;13;12;12;1	0;0;0;0;0;0		KRT17	>tr|F5GWP8|F5GWP8_HUMAN Junction plakoglobin OS=Homo sapiens GN=JUP PE=3 SV=1	6	52	52	0	39	33	38	44	33	39	39	39	37	40	47	42	39	33	38	44	33	39	39	39	37	40	47	42	0	0	0	0	0	0	0	0	0	0	0	0	66	66
F5GWU7;Q99717;D6RBB4;D6RIZ9;D6R9D4;H0YAK7;H0YAM3	F5GWU7;Q99717	19;19;9;7;4;3;1	19;19;9;7;4;3;1	8;8;3;3;2;1;1	Mothers against decapentaplegic homolog 5	SMAD5	>tr|F5GWU7|F5GWU7_HUMAN Mothers against decapentaplegic homolog 5 OS=Homo sapiens GN=SMAD5 PE=4 SV=1;>sp|Q99717|SMAD5_HUMAN Mothers against decapentaplegic homolog 5 OS=Homo sapiens GN=SMAD5 PE=1 SV=1	7	19	19	8	13	13	17	15	15	15	15	16	16	11	14	14	13	13	17	15	15	15	15	16	16	11	14	14	3	4	7	5	6	5	5	5	6	3	4	5	47.6	47.6
F5GWZ7;Q9UQ35	F5GWZ7;Q9UQ35	5;5	5;5	5;5	Serine/arginine repetitive matrix protein 2	SRRM2	>tr|F5GWZ7|F5GWZ7_HUMAN Serine/arginine repetitive matrix protein 2 OS=Homo sapiens GN=SRRM2 PE=4 SV=1;>sp|Q9UQ35|SRRM2_HUMAN Serine/arginine repetitive matrix protein 2 OS=Homo sapiens GN=SRRM2 PE=1 SV=2	2	5	5	5	1	3	0	1	0	2	0	2	3	3	4	3	1	3	0	1	0	2	0	2	3	3	4	3	1	3	0	1	0	2	0	2	3	3	4	3	3.8	3.8
F5GX09;Q5HYJ3;B2R9C2;Q5HYJ3-2;F5H5F4	F5GX09;Q5HYJ3;B2R9C2;Q5HYJ3-2	13;13;8;8;2	13;13;8;8;2	11;11;6;6;2	Protein FAM76B	FAM76B	>tr|F5GX09|F5GX09_HUMAN Protein FAM76B OS=Homo sapiens GN=FAM76B PE=4 SV=1;>sp|Q5HYJ3|FA76B_HUMAN Protein FAM76B OS=Homo sapiens GN=FAM76B PE=1 SV=3;>tr|B2R9C2|B2R9C2_HUMAN Family with sequence similarity 76, member B, isoform CRA_a OS=Homo sapiens GN=FAM7	5	13	13	11	10	8	7	6	11	8	11	9	8	6	5	7	10	8	7	6	11	8	11	9	8	6	5	7	9	8	7	6	11	8	10	9	7	6	5	7	37.3	37.3
F5GX42;Q15155;H3BUC9;F5H826;Q4G177;Q5JPE7-2;P69849;Q5JPE7	F5GX42;Q15155;H3BUC9;F5H826;Q4G177;Q5JPE7-2;P69849;Q5JPE7	2;2;1;1;1;1;1;1	2;2;1;1;1;1;1;1	2;2;1;1;1;1;1;1	Nodal modulator 1;Nodal modulator 2;Nodal modulator 3	NOMO1;NOMO2;NOMO3	>tr|F5GX42|F5GX42_HUMAN Nodal modulator 1 OS=Homo sapiens GN=NOMO1 PE=4 SV=1;>sp|Q15155|NOMO1_HUMAN Nodal modulator 1 OS=Homo sapiens GN=NOMO1 PE=1 SV=5;>tr|H3BUC9|H3BUC9_HUMAN Nodal modulator 1 (Fragment) OS=Homo sapiens GN=NOMO1 PE=4 SV=1;>tr|F5H826|F5H8	8	2	2	2	0	0	1	0	0	0	1	0	0	1	0	1	0	0	1	0	0	0	1	0	0	1	0	1	0	0	1	0	0	0	1	0	0	1	0	1	2.4	2.4
F5GXD0;Q12986-3;Q12986-2;Q12986	F5GXD0;Q12986-3;Q12986-2;Q12986	12;12;12;12	12;12;12;12	12;12;12;12	Transcriptional repressor NF-X1	NFX1	>tr|F5GXD0|F5GXD0_HUMAN Transcriptional repressor NF-X1 OS=Homo sapiens GN=NFX1 PE=4 SV=1;>sp|Q12986-3|NFX1_HUMAN Isoform 3 of Transcriptional repressor NF-X1 OS=Homo sapiens GN=NFX1;>sp|Q12986-2|NFX1_HUMAN Isoform 2 of Transcriptional repressor NF-X1 OS=H	4	12	12	12	6	7	9	5	9	10	11	8	8	5	4	5	6	7	9	5	9	10	11	8	8	5	4	5	6	7	9	5	9	10	11	8	8	5	4	5	19.8	19.8
F5GXJ4;Q9P246;H0Y860;E9PGD0;H7C5A5;H7C5K2;H7C5C6	F5GXJ4;Q9P246;H0Y860;E9PGD0;H7C5A5;H7C5K2	35;35;33;33;25;18;7	35;35;33;33;25;18;7	34;34;32;32;24;17;7	Stromal interaction molecule 2	STIM2	>tr|F5GXJ4|F5GXJ4_HUMAN Stromal interaction molecule 2 OS=Homo sapiens GN=STIM2 PE=4 SV=1;>sp|Q9P246|STIM2_HUMAN Stromal interaction molecule 2 OS=Homo sapiens GN=STIM2 PE=1 SV=2;>tr|H0Y860|H0Y860_HUMAN Stromal interaction molecule 2 OS=Homo sapiens GN=STI	7	35	35	34	28	24	28	20	25	26	26	30	27	23	23	23	28	24	28	20	25	26	26	30	27	23	23	23	27	23	27	20	24	25	25	30	26	23	23	22	43.9	43.9
F5GXK1;P20585	F5GXK1;P20585	29;29	29;29	29;29	DNA mismatch repair protein Msh3	MSH3	>tr|F5GXK1|F5GXK1_HUMAN DNA mismatch repair protein Msh3 OS=Homo sapiens GN=MSH3 PE=3 SV=1;>sp|P20585|MSH3_HUMAN DNA mismatch repair protein Msh3 OS=Homo sapiens GN=MSH3 PE=1 SV=4	2	29	29	29	4	5	5	3	0	0	0	0	24	24	24	27	4	5	5	3	0	0	0	0	24	24	24	27	4	5	5	3	0	0	0	0	24	24	24	27	35.8	35.8
F5GXV8;I3L521	F5GXV8;I3L521	7;6	1;1	1;1		RBM7	>tr|F5GXV8|F5GXV8_HUMAN RNA-binding protein 7 OS=Homo sapiens GN=RBM7 PE=4 SV=1;>tr|I3L521|I3L521_HUMAN Uncharacterized protein (Fragment) OS=Homo sapiens PE=4 SV=1	2	7	1	1	7	5	7	5	7	5	5	7	5	5	6	6	1	1	1	0	1	0	0	1	1	0	1	1	1	1	1	0	1	0	0	1	1	0	1	1	73.2	21.5
F5GXX5;P61803;F5H895	F5GXX5;P61803;F5H895	3;3;2	3;3;2	3;3;2	Dolichyl-diphosphooligosaccharide--protein glycosyltransferase subunit DAD1	DAD1	>tr|F5GXX5|F5GXX5_HUMAN Dolichyl-diphosphooligosaccharide--protein glycosyltransferase subunit DAD1 OS=Homo sapiens GN=DAD1 PE=4 SV=1;>sp|P61803|DAD1_HUMAN Dolichyl-diphosphooligosaccharide--protein glycosyltransferase subunit DAD1 OS=Homo sapiens GN=DAD1	3	3	3	3	3	2	2	2	2	3	3	2	3	3	2	2	3	2	2	2	2	3	3	2	3	3	2	2	3	2	2	2	2	3	3	2	3	3	2	2	37.6	37.6
F5GY30;P04156-2;P04156	F5GY30;P04156-2;P04156	3;3;3	3;3;3	3;3;3	Major prion protein	PRNP	>tr|F5GY30|F5GY30_HUMAN Major prion protein OS=Homo sapiens GN=PRNP PE=3 SV=1;>sp|P04156-2|PRIO_HUMAN Isoform 2 of Major prion protein OS=Homo sapiens GN=PRNP;>sp|P04156|PRIO_HUMAN Major prion protein OS=Homo sapiens GN=PRNP PE=1 SV=1	3	3	3	3	3	3	3	2	2	2	2	2	1	3	2	2	3	3	3	2	2	2	2	2	1	3	2	2	3	3	3	2	2	2	2	2	1	3	2	2	14.1	14.1
F5GY37;Q99623;B4DW05;B4DP75;F5H3X6;F5GWA7;F5H0C5;F5H2D2;F5H0S4	F5GY37;Q99623;B4DW05;B4DP75;F5H3X6;F5GWA7	16;16;13;13;11;11;7;6;6	16;16;13;13;11;11;7;6;6	16;16;13;13;11;11;7;6;6	Prohibitin-2	PHB2	>tr|F5GY37|F5GY37_HUMAN Prohibitin-2 OS=Homo sapiens GN=PHB2 PE=4 SV=1;>sp|Q99623|PHB2_HUMAN Prohibitin-2 OS=Homo sapiens GN=PHB2 PE=1 SV=2;>tr|B4DW05|B4DW05_HUMAN Prohibitin-2 OS=Homo sapiens GN=PHB2 PE=2 SV=1;>tr|B4DP75|B4DP75_HUMAN Prohibitin-2 OS=Homo	9	16	16	16	13	13	12	12	12	13	12	12	14	14	12	13	13	13	12	12	12	13	12	12	14	14	12	13	13	13	12	12	12	13	12	12	14	14	12	13	60.7	60.7
F5GYF8;O43166-2;O43166	F5GYF8;O43166-2;O43166	5;5;5	5;5;5	5;5;5	Signal-induced proliferation-associated 1-like protein 1	SIPA1L1	>tr|F5GYF8|F5GYF8_HUMAN Signal-induced proliferation-associated 1-like protein 1 OS=Homo sapiens GN=SIPA1L1 PE=4 SV=1;>sp|O43166-2|SI1L1_HUMAN Isoform 2 of Signal-induced proliferation-associated 1-like protein 1 OS=Homo sapiens GN=SIPA1L1;>sp|O43166|SI1L1	3	5	5	5	2	5	2	0	0	1	0	2	2	2	3	1	2	5	2	0	0	1	0	2	2	2	3	1	2	5	2	0	0	1	0	2	2	2	3	1	4.9	4.9
F5GYQ4;P00367;F8WA20;B4DGN5;B3KV55;H0YFJ0	F5GYQ4;P00367;F8WA20;B4DGN5;B3KV55	25;25;20;20;18;11	25;25;20;20;18;11	10;10;9;9;9;5	Glutamate dehydrogenase 1, mitochondrial	GLUD1	>tr|F5GYQ4|F5GYQ4_HUMAN Glutamate dehydrogenase OS=Homo sapiens GN=GLUD1 PE=3 SV=1;>sp|P00367|DHE3_HUMAN Glutamate dehydrogenase 1, mitochondrial OS=Homo sapiens GN=GLUD1 PE=1 SV=2;>tr|F8WA20|F8WA20_HUMAN Glutamate dehydrogenase OS=Homo sapiens GN=GLUD1 PE	6	25	25	10	18	20	19	20	21	19	21	23	16	20	22	20	18	20	19	20	21	19	21	23	16	20	22	20	6	8	7	8	8	8	8	9	5	7	8	10	61.6	61.6
F5GZ16;Q13200;E7EW34;E9PCS3;H0Y305;F8WBS8;H7C2Q3;H7C1H2;C9JPC0	F5GZ16;Q13200;E7EW34;E9PCS3	5;5;4;3;2;1;1;1;1	5;5;4;3;2;1;1;1;1	5;5;4;3;2;1;1;1;1	26S proteasome non-ATPase regulatory subunit 2	PSMD2	>tr|F5GZ16|F5GZ16_HUMAN 26S proteasome non-ATPase regulatory subunit 2 OS=Homo sapiens GN=PSMD2 PE=4 SV=1;>sp|Q13200|PSMD2_HUMAN 26S proteasome non-ATPase regulatory subunit 2 OS=Homo sapiens GN=PSMD2 PE=1 SV=3;>tr|E7EW34|E7EW34_HUMAN 26S proteasome non-AT	9	5	5	5	3	4	3	5	2	3	4	4	3	3	3	2	3	4	3	5	2	3	4	4	3	3	3	2	3	4	3	5	2	3	4	4	3	3	3	2	8.7	8.7
H7BZ41;F5GZB4	H7BZ41;F5GZB4	1;1	1;1	1;1		LOXHD1	>tr|H7BZ41|H7BZ41_HUMAN Lipoxygenase homology domain-containing protein 1 (Fragment) OS=Homo sapiens GN=LOXHD1 PE=4 SV=1;>tr|F5GZB4|F5GZB4_HUMAN Lipoxygenase homology domain-containing protein 1 OS=Homo sapiens GN=LOXHD1 PE=4 SV=1	2	1	1	1	1	0	1	0	0	1	0	0	0	0	0	0	1	0	1	0	0	1	0	0	0	0	0	0	1	0	1	0	0	1	0	0	0	0	0	0	1.1	1.1
F5GZC0;O75635;C9JM00	F5GZC0;O75635;C9JM00	2;2;1	2;2;1	2;2;1	Serpin B7	SERPINB7	>tr|F5GZC0|F5GZC0_HUMAN Serpin B7 OS=Homo sapiens GN=SERPINB7 PE=3 SV=1;>sp|O75635|SPB7_HUMAN Serpin B7 OS=Homo sapiens GN=SERPINB7 PE=2 SV=1;>tr|C9JM00|C9JM00_HUMAN Serpin B7 (Fragment) OS=Homo sapiens GN=SERPINB7 PE=3 SV=1	3	2	2	2	0	1	0	2	0	0	0	0	0	1	1	0	0	1	0	2	0	0	0	0	0	1	1	0	0	1	0	2	0	0	0	0	0	1	1	0	6.1	6.1
F5GZH2;Q9Y283-2;Q9Y283	F5GZH2;Q9Y283-2;Q9Y283	1;1;1	1;1;1	1;1;1	Inversin	INVS	>tr|F5GZH2|F5GZH2_HUMAN Inversin OS=Homo sapiens GN=INVS PE=4 SV=1;>sp|Q9Y283-2|INVS_HUMAN Isoform 2 of Inversin OS=Homo sapiens GN=INVS;>sp|Q9Y283|INVS_HUMAN Inversin OS=Homo sapiens GN=INVS PE=1 SV=2	3	1	1	1	1	1	1	1	1	1	1	1	1	1	1	1	1	1	1	1	1	1	1	1	1	1	1	1	1	1	1	1	1	1	1	1	1	1	1	1	0.9	0.9
F5GZU8;F5H327;F5H185;G8JLM9;G8JLD3;Q8IUD2-4;Q8IUD2-2;Q8IUD2-3;Q8IUD2;G8JLA4;Q8IUD2-5	F5GZU8;F5H327;F5H185;G8JLM9;G8JLD3;Q8IUD2-4;Q8IUD2-2;Q8IUD2-3;Q8IUD2;G8JLA4;Q8IUD2-5	2;2;2;2;2;2;2;2;2;1;1	1;1;1;1;1;1;1;1;1;1;1	1;1;1;1;1;1;1;1;1;1;1	ELKS/Rab6-interacting/CAST family member 1	ERC1	>tr|F5GZU8|F5GZU8_HUMAN ELKS/Rab6-interacting/CAST family member 1 OS=Homo sapiens GN=ERC1 PE=4 SV=1;>tr|F5H327|F5H327_HUMAN ELKS/Rab6-interacting/CAST family member 1 OS=Homo sapiens GN=ERC1 PE=4 SV=1;>tr|F5H185|F5H185_HUMAN ELKS/Rab6-interacting/CAST fam	11	2	1	1	1	1	1	1	1	1	1	1	1	1	0	0	0	0	0	0	1	0	0	0	0	0	0	0	0	0	0	0	1	0	0	0	0	0	0	0	7.5	5
F5H049;Q7Z2Y5-2;Q7Z2Y5	F5H049;Q7Z2Y5-2;Q7Z2Y5	1;1;1	1;1;1	1;1;1	Nik-related protein kinase	NRK	>tr|F5H049|F5H049_HUMAN Nik-related protein kinase OS=Homo sapiens GN=NRK PE=4 SV=1;>sp|Q7Z2Y5-2|NRK_HUMAN Isoform 2 of Nik-related protein kinase OS=Homo sapiens GN=NRK;>sp|Q7Z2Y5|NRK_HUMAN Nik-related protein kinase OS=Homo sapiens GN=NRK PE=2 SV=2	3	1	1	1	0	0	0	1	1	1	0	0	0	1	1	0	0	0	0	1	1	1	0	0	0	1	1	0	0	0	0	1	1	1	0	0	0	1	1	0	0.6	0.6
F5H1L1;F5H0H3;Q15424;F5GZU3;B7Z2F6;B7Z959	F5H1L1;F5H0H3;Q15424;F5GZU3;B7Z2F6;B7Z959	15;15;15;12;12;8	6;6;6;3;3;6	6;6;6;3;3;6	Scaffold attachment factor B1	SAFB	>tr|F5H1L1|F5H1L1_HUMAN Scaffold attachment factor B1 OS=Homo sapiens GN=SAFB PE=4 SV=1;>tr|F5H0H3|F5H0H3_HUMAN Scaffold attachment factor B1 OS=Homo sapiens GN=SAFB PE=4 SV=1;>sp|Q15424|SAFB1_HUMAN Scaffold attachment factor B1 OS=Homo sapiens GN=SAFB PE=	6	15	6	6	12	7	7	7	4	7	7	9	11	11	10	10	5	2	3	2	0	3	3	4	4	4	3	5	5	2	3	2	0	3	3	4	4	4	3	5	23.8	10.8
Q9HBD4;F5H0X5;P51532-5;P51532-2;P51532-3;P51532-4;P51532;H0YGM3	Q9HBD4;F5H0X5;P51532-5;P51532-2;P51532-3;P51532-4;P51532	22;22;22;22;22;22;22;1	22;22;22;22;22;22;22;1	12;12;12;12;12;12;12;1	Transcription activator BRG1	SMARCA4	>tr|Q9HBD4|Q9HBD4_HUMAN SMARCA4 isoform 2 OS=Homo sapiens GN=SMARCA4 PE=2 SV=1;>tr|F5H0X5|F5H0X5_HUMAN Transcription activator BRG1 OS=Homo sapiens GN=SMARCA4 PE=4 SV=1;>sp|P51532-5|SMCA4_HUMAN Isoform 5 of Transcription activator BRG1 OS=Homo sapiens GN=S	8	22	22	12	15	16	14	14	13	15	14	10	11	16	15	17	15	16	14	14	13	15	14	10	11	16	15	17	10	10	9	8	9	9	10	8	8	10	9	11	15.1	15.1
H3BSJ6;H3BRH0;F5H144;H3BPC0;Q9Y653-2;Q9Y653;E7ENB2	H3BSJ6;H3BRH0;F5H144;H3BPC0;Q9Y653-2;Q9Y653;E7ENB2	2;2;2;2;2;2;1	2;2;2;2;2;2;1	2;2;2;2;2;2;1	G-protein coupled receptor 56;GPR56 N-terminal fragment;GPR56 C-terminal fragment	GPR56	>tr|H3BSJ6|H3BSJ6_HUMAN G-protein-coupled receptor 56 (Fragment) OS=Homo sapiens GN=GPR56 PE=4 SV=1;>tr|H3BRH0|H3BRH0_HUMAN G-protein-coupled receptor 56 (Fragment) OS=Homo sapiens GN=GPR56 PE=4 SV=1;>tr|F5H144|F5H144_HUMAN G-protein-coupled receptor 56 OS	7	2	2	2	0	1	0	0	1	1	1	2	0	0	0	0	0	1	0	0	1	1	1	2	0	0	0	0	0	1	0	0	1	1	1	2	0	0	0	0	17.1	17.1
F5H2I6;F5H1N7;Q6ZU35	F5H2I6;F5H1N7;Q6ZU35	2;2;2	2;2;2	2;2;2	Uncharacterized protein KIAA1211	KIAA1211	>tr|F5H2I6|F5H2I6_HUMAN Uncharacterized protein KIAA1211 OS=Homo sapiens GN=KIAA1211 PE=4 SV=1;>tr|F5H1N7|F5H1N7_HUMAN Uncharacterized protein KIAA1211 OS=Homo sapiens GN=KIAA1211 PE=4 SV=1;>sp|Q6ZU35|K1211_HUMAN Uncharacterized protein KIAA1211 OS=Homo sa	3	2	2	2	2	1	1	1	1	2	2	2	2	2	2	2	2	1	1	1	1	2	2	2	2	2	2	2	2	1	1	1	1	2	2	2	2	2	2	2	2.2	2.2
F5H1U5;P42357;F5GXF2	F5H1U5;P42357;F5GXF2	2;2;1	2;2;1	2;2;1	Histidine ammonia-lyase	HAL	>tr|F5H1U5|F5H1U5_HUMAN Histidine ammonia-lyase OS=Homo sapiens GN=HAL PE=3 SV=1;>sp|P42357|HUTH_HUMAN Histidine ammonia-lyase OS=Homo sapiens GN=HAL PE=1 SV=1;>tr|F5GXF2|F5GXF2_HUMAN Histidine ammonia-lyase OS=Homo sapiens GN=HAL PE=3 SV=1	3	2	2	2	1	1	1	1	1	1	1	1	1	1	2	1	1	1	1	1	1	1	1	1	1	1	2	1	1	1	1	1	1	1	1	1	1	1	2	1	6.9	6.9
H7BYZ1;G3V106;F5H2D1;Q9NT68;F8VNQ3;Q9UKZ4;Q9UKZ4-2	H7BYZ1;G3V106;F5H2D1;Q9NT68;F8VNQ3	78;78;78;78;77;1;1	78;78;78;78;77;1;1	76;76;76;76;75;1;1	Teneurin-2;Ten-2, soluble form;Ten-2 intracellular domain	TENM2	>tr|H7BYZ1|H7BYZ1_HUMAN Teneurin-2 OS=Homo sapiens GN=ODZ2 PE=4 SV=1;>tr|G3V106|G3V106_HUMAN HCG38403, isoform CRA_b OS=Homo sapiens GN=ODZ2 PE=4 SV=1;>tr|F5H2D1|F5H2D1_HUMAN Teneurin-2 OS=Homo sapiens GN=ODZ2 PE=4 SV=1;>sp|Q9NT68|TEN2_HUMAN Teneurin-2 OS=	7	78	78	76	65	60	62	54	66	61	68	63	66	58	62	59	65	60	62	54	66	61	68	63	66	58	62	59	63	58	60	52	64	59	66	61	64	56	60	57	38.8	38.8
F5H2G6;Q4G176;F5GX20;F5H3B2;H0YH37;H0YGC7;F5H362;F5H755;F5H5A1	F5H2G6;Q4G176;F5GX20	3;3;2;1;1;1;1;1;1	3;3;2;1;1;1;1;1;1	3;3;2;1;1;1;1;1;1	Acyl-CoA synthetase family member 3, mitochondrial	ACSF3	>tr|F5H2G6|F5H2G6_HUMAN Acyl-CoA synthetase family member 3, mitochondrial OS=Homo sapiens GN=ACSF3 PE=4 SV=1;>sp|Q4G176|ACSF3_HUMAN Acyl-CoA synthetase family member 3, mitochondrial OS=Homo sapiens GN=ACSF3 PE=1 SV=3;>tr|F5GX20|F5GX20_HUMAN Acyl-CoA synt	9	3	3	3	1	1	1	1	1	2	1	1	0	0	1	0	1	1	1	1	1	2	1	1	0	0	1	0	1	1	1	1	1	2	1	1	0	0	1	0	7.3	7.3
F5H2Q7;F5H2Y7;Q9C0E8-2;Q9C0E8;B7ZLA8;Q9C0E8-3;C9JL94	F5H2Q7;F5H2Y7;Q9C0E8-2;Q9C0E8;B7ZLA8;Q9C0E8-3	11;11;11;11;10;8;1	11;11;11;11;10;8;1	11;11;11;11;10;8;1	Protein lunapark	LNP	>tr|F5H2Q7|F5H2Q7_HUMAN Protein KIAA1715 OS=Homo sapiens GN=KIAA1715 PE=4 SV=1;>tr|F5H2Y7|F5H2Y7_HUMAN Protein KIAA1715 OS=Homo sapiens GN=KIAA1715 PE=4 SV=1;>sp|Q9C0E8-2|LNP_HUMAN Isoform 2 of Protein lunapark OS=Homo sapiens GN=LNP;>sp|Q9C0E8|LNP_HUMAN P	7	11	11	11	8	7	8	9	8	11	10	10	9	8	9	8	8	7	8	9	8	11	10	10	9	8	9	8	8	7	8	9	8	11	10	10	9	8	9	8	45.2	45.2
Q9UDY2-5;Q9UDY2-4;Q9UDY2-2;F5H886;Q9UDY2-3;Q9UDY2;F5H301	Q9UDY2-5;Q9UDY2-4;Q9UDY2-2;F5H886;Q9UDY2-3;Q9UDY2;F5H301	5;5;5;5;5;5;5	5;5;5;5;5;5;5	5;5;5;5;5;5;5	Tight junction protein ZO-2	TJP2	>sp|Q9UDY2-5|ZO2_HUMAN Isoform A3 of Tight junction protein ZO-2 OS=Homo sapiens GN=TJP2;>sp|Q9UDY2-4|ZO2_HUMAN Isoform C2 of Tight junction protein ZO-2 OS=Homo sapiens GN=TJP2;>sp|Q9UDY2-2|ZO2_HUMAN Isoform A2 of Tight junction protein ZO-2 OS=Homo sapie	7	5	5	5	1	4	4	3	1	3	2	0	0	1	0	1	1	4	4	3	1	3	2	0	0	1	0	1	1	4	4	3	1	3	2	0	0	1	0	1	6	6
F5H325;P34059	F5H325;P34059	1;1	1;1	1;1	N-acetylgalactosamine-6-sulfatase	GALNS	>tr|F5H325|F5H325_HUMAN N-acetylgalactosamine-6-sulfatase OS=Homo sapiens GN=GALNS PE=4 SV=1;>sp|P34059|GALNS_HUMAN N-acetylgalactosamine-6-sulfatase OS=Homo sapiens GN=GALNS PE=1 SV=1	2	1	1	1	1	0	1	0	1	0	1	1	0	0	1	0	1	0	1	0	1	0	1	1	0	0	1	0	1	0	1	0	1	0	1	1	0	0	1	0	2	2
G3V4V1;G3V1W4;G3V3G5;G3V2R6;F5H365;Q15436;G3V5X8;G3V4Q2	G3V4V1;G3V1W4;G3V3G5;G3V2R6;F5H365;Q15436;G3V5X8;G3V4Q2	3;3;3;3;3;3;2;2	1;1;1;1;1;1;1;1	1;1;1;1;1;1;1;1	Protein transport protein Sec23A	SEC23A	>tr|G3V4V1|G3V4V1_HUMAN Protein transport protein Sec23A (Fragment) OS=Homo sapiens GN=SEC23A PE=4 SV=1;>tr|G3V1W4|G3V1W4_HUMAN Protein transport protein Sec23A OS=Homo sapiens GN=SEC23A PE=4 SV=1;>tr|G3V3G5|G3V3G5_HUMAN Protein transport protein Sec23A (F	8	3	1	1	0	0	2	0	2	2	3	2	3	0	0	2	0	0	1	0	0	0	1	1	1	0	0	1	0	0	1	0	0	0	1	1	1	0	0	1	37.2	13.8
P05023;F5H3A1;B7Z3U6;H7BXX5;P05023-2;B7Z1Q9;E9PC07;E9PC51;P13637;F5H6J6;B7Z2T0;F5H0J0;B1AKY9;P50993;H0Y7C1;B4DIQ8;P20648;B4DHD7;Q13733;P54707;P54707-2	P05023;F5H3A1;B7Z3U6;H7BXX5;P05023-2	12;12;11;8;8;4;4;4;4;4;4;3;3;3;2;2;2;1;1;1;1	12;12;11;8;8;4;4;4;4;4;4;3;3;3;2;2;2;1;1;1;1	12;12;11;8;8;4;4;4;4;4;4;3;3;3;2;2;2;1;1;1;1	Sodium/potassium-transporting ATPase subunit alpha-1	ATP1A1	>sp|P05023|AT1A1_HUMAN Sodium/potassium-transporting ATPase subunit alpha-1 OS=Homo sapiens GN=ATP1A1 PE=1 SV=1;>tr|F5H3A1|F5H3A1_HUMAN Sodium/potassium-transporting ATPase subunit alpha-1 OS=Homo sapiens GN=ATP1A1 PE=3 SV=1;>tr|B7Z3U6|B7Z3U6_HUMAN ATPase,	21	12	12	12	8	8	7	9	8	8	10	10	4	9	10	10	8	8	7	9	8	8	10	10	4	9	10	10	8	8	7	9	8	8	10	10	4	9	10	10	14.7	14.7
F5H3H2;P17858;P08237;P17858-2	F5H3H2;P17858;P08237;P17858-2	1;1;1;1	1;1;1;1	1;1;1;1	ATP-dependent 6-phosphofructokinase, liver type;ATP-dependent 6-phosphofructokinase, muscle type	PFKL;PFKM	>tr|F5H3H2|F5H3H2_HUMAN 6-phosphofructokinase, liver type OS=Homo sapiens GN=PFKL PE=4 SV=1;>sp|P17858|K6PL_HUMAN 6-phosphofructokinase, liver type OS=Homo sapiens GN=PFKL PE=1 SV=6;>sp|P08237|K6PF_HUMAN 6-phosphofructokinase, muscle type OS=Homo sapiens G	4	1	1	1	1	1	1	1	1	1	1	1	1	1	1	1	1	1	1	1	1	1	1	1	1	1	1	1	1	1	1	1	1	1	1	1	1	1	1	1	1.6	1.6
F5H3H6;Q9BQ39	F5H3H6;Q9BQ39	3;3	2;2	2;2	ATP-dependent RNA helicase DDX50	DDX50	>tr|F5H3H6|F5H3H6_HUMAN ATP-dependent RNA helicase DDX50 OS=Homo sapiens GN=DDX50 PE=4 SV=1;>sp|Q9BQ39|DDX50_HUMAN ATP-dependent RNA helicase DDX50 OS=Homo sapiens GN=DDX50 PE=1 SV=1	2	3	2	2	3	1	1	2	1	2	2	3	3	2	1	2	2	0	0	1	0	1	1	2	2	1	0	1	2	0	0	1	0	1	1	2	2	1	0	1	6.8	4.6
F5H3K3;Q9UM82	F5H3K3;Q9UM82	2;2	2;2	2;2	Spermatogenesis-associated protein 2	SPATA2	>tr|F5H3K3|F5H3K3_HUMAN Spermatogenesis-associated protein 2 OS=Homo sapiens GN=SPATA2 PE=4 SV=1;>sp|Q9UM82|SPAT2_HUMAN Spermatogenesis-associated protein 2 OS=Homo sapiens GN=SPATA2 PE=1 SV=2	2	2	2	2	1	0	0	1	0	1	0	1	0	0	0	1	1	0	0	1	0	1	0	1	0	0	0	1	1	0	0	1	0	1	0	1	0	0	0	1	6.3	6.3
F5H6E2;F5H3W9;O00159-2;O00159-3;O00159;F5H730;I3L204;I3L4D4;I3L501;I3L3Y6	F5H6E2;F5H3W9;O00159-2;O00159-3;O00159;F5H730	7;7;7;7;7;5;3;1;1;1	7;7;7;7;7;5;3;1;1;1	7;7;7;7;7;5;3;1;1;1	Unconventional myosin-Ic	MYO1C	>tr|F5H6E2|F5H6E2_HUMAN Unconventional myosin-Ic OS=Homo sapiens GN=MYO1C PE=4 SV=1;>tr|F5H3W9|F5H3W9_HUMAN Unconventional myosin-Ic OS=Homo sapiens GN=MYO1C PE=4 SV=1;>sp|O00159-2|MYO1C_HUMAN Isoform 2 of Unconventional myosin-Ic OS=Homo sapiens GN=MYO1C;	10	7	7	7	0	1	0	3	0	0	0	1	0	0	0	5	0	1	0	3	0	0	0	1	0	0	0	5	0	1	0	3	0	0	0	1	0	0	0	5	9.2	9.2
F5H3Y1;Q93074-3;Q93074;Q93074-2;H0Y7P1;H0Y6W6;H7C191	F5H3Y1;Q93074-3;Q93074;Q93074-2;H0Y7P1	17;17;17;17;16;7;1	17;17;17;17;16;7;1	17;17;17;17;16;7;1	Mediator of RNA polymerase II transcription subunit 12	MED12	>tr|F5H3Y1|F5H3Y1_HUMAN Mediator of RNA polymerase II transcription subunit 12 OS=Homo sapiens GN=MED12 PE=4 SV=1;>sp|Q93074-3|MED12_HUMAN Isoform 3 of Mediator of RNA polymerase II transcription subunit 12 OS=Homo sapiens GN=MED12;>sp|Q93074|MED12_HUMAN M	7	17	17	17	7	5	8	6	6	6	6	9	7	6	3	5	7	5	8	6	6	6	6	9	7	6	3	5	7	5	8	6	6	6	6	9	7	6	3	5	10.3	10.3
F5H3Y6;Q03701;C9J9W7	F5H3Y6;Q03701	5;5;1	5;5;1	5;5;1	CCAAT/enhancer-binding protein zeta	CEBPZ	>tr|F5H3Y6|F5H3Y6_HUMAN CCAAT/enhancer-binding protein zeta OS=Homo sapiens GN=CEBPZ PE=4 SV=1;>sp|Q03701|CEBPZ_HUMAN CCAAT/enhancer-binding protein zeta OS=Homo sapiens GN=CEBPZ PE=1 SV=3	3	5	5	5	2	4	2	1	1	3	2	4	2	3	3	4	2	4	2	1	1	3	2	4	2	3	3	4	2	4	2	1	1	3	2	4	2	3	3	4	6.2	6.2
F5H4J5;G3V529;Q9GZR7;F5H4V3;F5GYL3;Q4V9L5	F5H4J5;G3V529;Q9GZR7;F5H4V3;F5GYL3;Q4V9L5	4;4;4;3;3;3	4;4;4;3;3;3	4;4;4;3;3;3	ATP-dependent RNA helicase DDX24	DDX24	>tr|F5H4J5|F5H4J5_HUMAN ATP-dependent RNA helicase DDX24 OS=Homo sapiens GN=DDX24 PE=3 SV=1;>tr|G3V529|G3V529_HUMAN ATP-dependent RNA helicase DDX24 OS=Homo sapiens GN=DDX24 PE=3 SV=1;>sp|Q9GZR7|DDX24_HUMAN ATP-dependent RNA helicase DDX24 OS=Homo sapiens	6	4	4	4	2	1	2	0	0	2	0	3	2	1	1	2	2	1	2	0	0	2	0	3	2	1	1	2	2	1	2	0	0	2	0	3	2	1	1	2	5.8	5.8
Q9BSJ2;F5H4L0;F2Z2B9;B3KTU7;F5H4E0	Q9BSJ2;F5H4L0;F2Z2B9	5;5;4;1;1	5;5;4;1;1	5;5;4;1;1	Gamma-tubulin complex component 2	TUBGCP2	>sp|Q9BSJ2|GCP2_HUMAN Gamma-tubulin complex component 2 OS=Homo sapiens GN=TUBGCP2 PE=1 SV=2;>tr|F5H4L0|F5H4L0_HUMAN Gamma-tubulin complex component 2 OS=Homo sapiens GN=TUBGCP2 PE=4 SV=1;>tr|F2Z2B9|F2Z2B9_HUMAN Gamma-tubulin complex component 2 OS=Homo sa	5	5	5	5	3	2	1	2	0	1	1	1	0	0	0	3	3	2	1	2	0	1	1	1	0	0	0	3	3	2	1	2	0	1	1	1	0	0	0	3	7.3	7.3
F5H4S2;F5H776;P33993;C9J8M6;P33993-2;A4D2A2	F5H4S2;F5H776;P33993;C9J8M6;P33993-2;A4D2A2	2;2;2;1;1;1	2;2;2;1;1;1	2;2;2;1;1;1	DNA replication licensing factor MCM7	MCM7	>tr|F5H4S2|F5H4S2_HUMAN DNA replication licensing factor MCM7 OS=Homo sapiens GN=MCM7 PE=3 SV=1;>tr|F5H776|F5H776_HUMAN DNA replication licensing factor MCM7 OS=Homo sapiens GN=MCM7 PE=3 SV=1;>sp|P33993|MCM7_HUMAN DNA replication licensing factor MCM7 OS=H	6	2	2	2	0	0	1	0	0	0	0	1	0	0	0	1	0	0	1	0	0	0	0	1	0	0	0	1	0	0	1	0	0	0	0	1	0	0	0	1	4.4	4.4
H0YKH1;H0YLF5;H0YKN0;P40424-2;F5H4U9;P40424;H0YLD4;H0YLT4;F8WA05;B7Z774;H0YLB0;H0YLM3	H0YKH1;H0YLF5;H0YKN0;P40424-2;F5H4U9;P40424;H0YLD4;H0YLT4;F8WA05;B7Z774;H0YLB0;H0YLM3	4;4;4;4;4;4;3;3;3;3;3;2	2;2;2;2;2;2;1;1;2;1;1;1	2;2;2;2;2;2;1;1;2;1;1;1	Pre-B-cell leukemia transcription factor 1	PBX1	>tr|H0YKH1|H0YKH1_HUMAN Pre-B-cell leukemia transcription factor 1 (Fragment) OS=Homo sapiens GN=PBX1 PE=4 SV=1;>tr|H0YLF5|H0YLF5_HUMAN Pre-B-cell leukemia transcription factor 1 OS=Homo sapiens GN=PBX1 PE=3 SV=1;>tr|H0YKN0|H0YKN0_HUMAN Pre-B-cell leukemia	12	4	2	2	1	0	2	0	4	3	2	3	3	1	1	1	1	0	1	0	2	1	1	2	2	1	1	1	1	0	1	0	2	1	1	2	2	1	1	1	43.4	27
F5H4V4;P46013-2;P46013;E7EN66	F5H4V4;P46013-2;P46013	14;14;14;5	14;14;14;5	14;14;14;5	Antigen KI-67	MKI67	>tr|F5H4V4|F5H4V4_HUMAN Antigen KI-67 OS=Homo sapiens GN=MKI67 PE=4 SV=1;>sp|P46013-2|KI67_HUMAN Isoform Short of Antigen KI-67 OS=Homo sapiens GN=MKI67;>sp|P46013|KI67_HUMAN Antigen KI-67 OS=Homo sapiens GN=MKI67 PE=1 SV=2	4	14	14	14	8	10	6	8	3	6	6	8	5	7	6	5	8	10	6	8	3	6	6	8	5	7	6	5	8	10	6	8	3	6	6	8	5	7	6	5	7.1	7.1
F5H5D3;Q9BQE3;E9PGK3;F8VVB9;F8VQQ4;F8VRZ4;F8VS66;F8VX09;F8VWV9;F8VRK0;A6NHL2-2;A6NHL2;F8VXZ7;F8VS94;F8VYI2;F8VXB8;F8W0F6	F5H5D3;Q9BQE3;E9PGK3;F8VVB9	17;17;11;10;7;5;5;4;4;2;2;2;1;1;1;1;1	2;2;2;0;0;0;0;0;0;0;0;0;0;0;0;0;0	1;1;1;0;0;0;0;0;0;0;0;0;0;0;0;0;0	Tubulin alpha-1C chain	TUBA1C;KLK9	>tr|F5H5D3|F5H5D3_HUMAN Tubulin alpha-1C chain OS=Homo sapiens GN=TUBA1C PE=3 SV=1;>sp|Q9BQE3|TBA1C_HUMAN Tubulin alpha-1C chain OS=Homo sapiens GN=TUBA1C PE=1 SV=1;>tr|E9PGK3|E9PGK3_HUMAN Tubulin alpha-1C chain OS=Homo sapiens GN=TUBA1C PE=4 SV=1;>tr|F8VV	17	17	2	1	15	15	16	15	14	14	14	14	13	13	13	13	1	1	1	1	1	1	1	1	1	1	1	2	0	0	0	0	0	0	0	0	0	0	0	1	45.5	7.1
F5H5H1;Q8NCL4	F5H5H1;Q8NCL4	3;3	3;3	3;3	Polypeptide N-acetylgalactosaminyltransferase 6	GALNT6	>tr|F5H5H1|F5H5H1_HUMAN Polypeptide N-acetylgalactosaminyltransferase 6 OS=Homo sapiens GN=GALNT6 PE=3 SV=1;>sp|Q8NCL4|GALT6_HUMAN Polypeptide N-acetylgalactosaminyltransferase 6 OS=Homo sapiens GN=GALNT6 PE=2 SV=2	2	3	3	3	1	0	0	0	1	1	1	1	1	0	0	2	1	0	0	0	1	1	1	1	1	0	0	2	1	0	0	0	1	1	1	1	1	0	0	2	7.5	7.5
F8W1A2;F5H5N4;F8VVB6;Q99435-4;Q99435;Q99435-2;Q99435-3;F8VXR5;F8VRQ0;F8VZ72	F8W1A2;F5H5N4;F8VVB6;Q99435-4;Q99435;Q99435-2;Q99435-3;F8VXR5;F8VRQ0;F8VZ72	2;2;2;2;2;2;2;1;1;1	2;2;2;2;2;2;2;1;1;1	2;2;2;2;2;2;2;1;1;1	Protein kinase C-binding protein NELL2	NELL2	>tr|F8W1A2|F8W1A2_HUMAN Protein kinase C-binding protein NELL2 (Fragment) OS=Homo sapiens GN=NELL2 PE=4 SV=1;>tr|F5H5N4|F5H5N4_HUMAN Protein kinase C-binding protein NELL2 OS=Homo sapiens GN=NELL2 PE=4 SV=1;>tr|F8VVB6|F8VVB6_HUMAN Protein kinase C-binding	10	2	2	2	1	0	2	0	0	0	0	0	0	0	0	0	1	0	2	0	0	0	0	0	0	0	0	0	1	0	2	0	0	0	0	0	0	0	0	0	9	9
Q8TEW0-9;Q8TEW0-7;Q8TEW0-6;F5H5T0;Q5VWU8;Q8TEW0-10;Q8TEW0-8;Q8TEW0-4;Q8TEW0-2;Q8TEW0;Q5VWV2;Q8TEW0-5;Q8TEW0-3;F5GZI3;B1AP52	Q8TEW0-9;Q8TEW0-7;Q8TEW0-6;F5H5T0;Q5VWU8;Q8TEW0-10;Q8TEW0-8;Q8TEW0-4;Q8TEW0-2;Q8TEW0;Q5VWV2;Q8TEW0-5;Q8TEW0-3;F5GZI3	24;24;24;24;23;23;23;23;23;23;22;22;22;18;7	24;24;24;24;23;23;23;23;23;23;22;22;22;18;7	24;24;24;24;23;23;23;23;23;23;22;22;22;18;7	Partitioning defective 3 homolog	PARD3	>sp|Q8TEW0-9|PARD3_HUMAN Isoform 9 of Partitioning defective 3 homolog OS=Homo sapiens GN=PARD3;>sp|Q8TEW0-7|PARD3_HUMAN Isoform 7 of Partitioning defective 3 homolog OS=Homo sapiens GN=PARD3;>sp|Q8TEW0-6|PARD3_HUMAN Isoform 6 of Partitioning defective 3 h	15	24	24	24	15	15	19	16	11	16	14	20	15	13	16	16	15	15	19	16	11	16	14	20	15	13	16	16	15	15	19	16	11	16	14	20	15	13	16	16	33.9	33.9
F5H602;H0Y8X6;Q96PU5-9;Q96PU5-4;Q96PU5-3;P46934-4;Q96PU5-2;Q96PU5-6;Q96PU5-5;Q96PU5-7;Q96PU5;Q96PU5-8;P46934-3;P46934-2;P46934	F5H602;H0Y8X6;Q96PU5-9;Q96PU5-4;Q96PU5-3;P46934-4;Q96PU5-2;Q96PU5-6;Q96PU5-5;Q96PU5-7;Q96PU5;Q96PU5-8;P46934-3;P46934-2;P46934	1;1;1;1;1;1;1;1;1;1;1;1;1;1;1	1;1;1;1;1;1;1;1;1;1;1;1;1;1;1	1;1;1;1;1;1;1;1;1;1;1;1;1;1;1	E3 ubiquitin-protein ligase NEDD4-like;E3 ubiquitin-protein ligase NEDD4	NEDD4;NEDD4L	>tr|F5H602|F5H602_HUMAN E3 ubiquitin-protein ligase OS=Homo sapiens GN=NEDD4L PE=4 SV=1;>tr|H0Y8X6|H0Y8X6_HUMAN E3 ubiquitin-protein ligase (Fragment) OS=Homo sapiens GN=NEDD4 PE=4 SV=1;>sp|Q96PU5-9|NED4L_HUMAN Isoform 9 of E3 ubiquitin-protein ligase NEDD	15	1	1	1	1	1	1	1	1	1	1	1	1	1	1	1	1	1	1	1	1	1	1	1	1	1	1	1	1	1	1	1	1	1	1	1	1	1	1	1	1.2	1.2
F5H656;Q8WXF1;Q8WXF1-2	F5H656;Q8WXF1;Q8WXF1-2	31;31;25	31;31;25	31;31;25	Paraspeckle component 1	PSPC1	>tr|F5H656|F5H656_HUMAN Paraspeckle component 1 OS=Homo sapiens GN=PSPC1 PE=4 SV=1;>sp|Q8WXF1|PSPC1_HUMAN Paraspeckle component 1 OS=Homo sapiens GN=PSPC1 PE=1 SV=1;>sp|Q8WXF1-2|PSPC1_HUMAN Isoform 2 of Paraspeckle component 1 OS=Homo sapiens GN=PSPC1	3	31	31	31	23	28	26	26	27	27	25	26	30	27	26	27	23	28	26	26	27	27	25	26	30	27	26	27	23	28	26	26	27	27	25	26	30	27	26	27	62.9	62.9
F5H658;Q14562	F5H658;Q14562	2;2	1;1	1;1	ATP-dependent RNA helicase DHX8	DHX8	>tr|F5H658|F5H658_HUMAN ATP-dependent RNA helicase DHX8 OS=Homo sapiens GN=DHX8 PE=4 SV=1;>sp|Q14562|DHX8_HUMAN ATP-dependent RNA helicase DHX8 OS=Homo sapiens GN=DHX8 PE=1 SV=1	2	2	1	1	2	1	1	1	1	1	1	1	2	1	2	1	1	0	0	0	0	0	0	0	1	0	1	0	1	0	0	0	0	0	0	0	1	0	1	0	1.6	0.8
F5H667;Q12797;F8W7A9;E5RHK2	F5H667;Q12797	13;13;3;2	13;13;3;2	13;13;3;2	Aspartyl/asparaginyl beta-hydroxylase	ASPH	>tr|F5H667|F5H667_HUMAN Aspartyl/asparaginyl beta-hydroxylase OS=Homo sapiens GN=ASPH PE=4 SV=1;>sp|Q12797|ASPH_HUMAN Aspartyl/asparaginyl beta-hydroxylase OS=Homo sapiens GN=ASPH PE=1 SV=3	4	13	13	13	10	9	10	10	8	10	9	7	8	9	7	12	10	9	10	10	8	10	9	7	8	9	7	12	10	9	10	10	8	10	9	7	8	9	7	12	17.6	17.6
F5H669	F5H669	21	1	1		CPSF7	>tr|F5H669|F5H669_HUMAN Cleavage and polyadenylation-specificity factor subunit 7 (Fragment) OS=Homo sapiens GN=CPSF7 PE=4 SV=1	1	21	1	1	17	16	17	17	19	17	17	16	19	18	15	17	1	0	0	1	1	1	0	0	1	1	0	0	1	0	0	1	1	1	0	0	1	1	0	0	63.4	8.3
F5H6A3;P51688;I3NI22	F5H6A3;P51688;I3NI22	2;2;1	2;2;1	2;2;1	N-sulphoglucosamine sulphohydrolase	SGSH	>tr|F5H6A3|F5H6A3_HUMAN N-sulphoglucosamine sulphohydrolase OS=Homo sapiens GN=SGSH PE=4 SV=1;>sp|P51688|SPHM_HUMAN N-sulphoglucosamine sulphohydrolase OS=Homo sapiens GN=SGSH PE=1 SV=1;>tr|I3NI22|I3NI22_HUMAN N-sulphoglucosamine sulphohydrolase (Fragment)	3	2	2	2	0	0	2	1	1	1	0	1	1	0	1	0	0	0	2	1	1	1	0	1	1	0	1	0	0	0	2	1	1	1	0	1	1	0	1	0	6.7	6.7
F5H6D0;Q13724;C9J8D4;B8ZZE2;C9JDQ1	F5H6D0;Q13724;C9J8D4	6;6;5;2;1	6;6;5;2;1	6;6;5;2;1	Mannosyl-oligosaccharide glucosidase	MOGS	>tr|F5H6D0|F5H6D0_HUMAN Mannosyl-oligosaccharide glucosidase OS=Homo sapiens GN=MOGS PE=4 SV=1;>sp|Q13724|MOGS_HUMAN Mannosyl-oligosaccharide glucosidase OS=Homo sapiens GN=MOGS PE=1 SV=5;>tr|C9J8D4|C9J8D4_HUMAN Mannosyl-oligosaccharide glucosidase (Fragme	5	6	6	6	2	2	3	1	2	0	2	5	3	2	3	2	2	2	3	1	2	0	2	5	3	2	3	2	2	2	3	1	2	0	2	5	3	2	3	2	12.2	12.2
F5H6G2;Q6P6C2-2;Q6P6C2	F5H6G2;Q6P6C2-2;Q6P6C2	7;7;5	7;7;5	7;7;5	RNA demethylase ALKBH5	ALKBH5	>tr|F5H6G2|F5H6G2_HUMAN Probable alpha-ketoglutarate-dependent dioxygenase ABH5 OS=Homo sapiens GN=ALKBH5 PE=4 SV=1;>sp|Q6P6C2-2|ALKB5_HUMAN Isoform 2 of Probable alpha-ketoglutarate-dependent dioxygenase ABH5 OS=Homo sapiens GN=ALKBH5;>sp|Q6P6C2|ALKB5_HUM	3	7	7	7	3	2	4	3	4	5	3	3	3	4	2	3	3	2	4	3	4	5	3	3	3	4	2	3	3	2	4	3	4	5	3	3	3	4	2	3	17.2	17.2
F5H6J9;Q9H1I8;B1AH59;B1AH60;Q9H1I8-2	F5H6J9;Q9H1I8;B1AH59;B1AH60;Q9H1I8-2	2;2;1;1;1	2;2;1;1;1	2;2;1;1;1	Activating signal cointegrator 1 complex subunit 2	ASCC2	>tr|F5H6J9|F5H6J9_HUMAN Activating signal cointegrator 1 complex subunit 2 OS=Homo sapiens GN=ASCC2 PE=4 SV=1;>sp|Q9H1I8|ASCC2_HUMAN Activating signal cointegrator 1 complex subunit 2 OS=Homo sapiens GN=ASCC2 PE=1 SV=3;>tr|B1AH59|B1AH59_HUMAN Activating si	5	2	2	2	0	0	1	1	1	1	1	0	2	0	0	1	0	0	1	1	1	1	1	0	2	0	0	1	0	0	1	1	1	1	1	0	2	0	0	1	2.6	2.6
F5H6K0;O43143;B0V0F8;O60231	F5H6K0;O43143	57;57;1;1	57;57;1;1	56;56;0;0	Putative pre-mRNA-splicing factor ATP-dependent RNA helicase DHX15	DHX15	>tr|F5H6K0|F5H6K0_HUMAN Putative pre-mRNA-splicing factor ATP-dependent RNA helicase DHX15 OS=Homo sapiens GN=DHX15 PE=4 SV=1;>sp|O43143|DHX15_HUMAN Putative pre-mRNA-splicing factor ATP-dependent RNA helicase DHX15 OS=Homo sapiens GN=DHX15 PE=1 SV=2	4	57	57	56	52	52	54	53	50	50	52	52	56	53	51	54	52	52	54	53	50	50	52	52	56	53	51	54	51	51	53	52	49	49	51	51	55	52	50	53	66.1	66.1
G3V1U5;F5H6U7;Q9Y3E0	G3V1U5;F5H6U7;Q9Y3E0	2;2;2	2;2;2	2;2;2	Vesicle transport protein GOT1B	GOLT1B	>tr|G3V1U5|G3V1U5_HUMAN Golgi transport 1 homolog B (S. cerevisiae), isoform CRA_c OS=Homo sapiens GN=GOLT1B PE=4 SV=1;>tr|F5H6U7|F5H6U7_HUMAN Vesicle transport protein GOT1B OS=Homo sapiens GN=GOLT1B PE=4 SV=1;>sp|Q9Y3E0|GOT1B_HUMAN Vesicle transport prot	3	2	2	2	2	2	2	2	2	1	1	2	2	2	2	2	2	2	2	2	2	1	1	2	2	2	2	2	2	2	2	2	2	1	1	2	2	2	2	2	20.3	20.3
F5H721;Q9Y2W2	F5H721;Q9Y2W2	1;1	1;1	1;1	WW domain-binding protein 11	WBP11	>tr|F5H721|F5H721_HUMAN WW domain-binding protein 11 OS=Homo sapiens GN=WBP11 PE=4 SV=1;>sp|Q9Y2W2|WBP11_HUMAN WW domain-binding protein 11 OS=Homo sapiens GN=WBP11 PE=1 SV=1	2	1	1	1	0	0	0	0	0	0	0	1	0	0	0	0	0	0	0	0	0	0	0	1	0	0	0	0	0	0	0	0	0	0	0	1	0	0	0	0	3.3	3.3
F5H737;P23526	F5H737;P23526	3;3	3;3	3;3	Adenosylhomocysteinase	AHCY	>tr|F5H737|F5H737_HUMAN Adenosylhomocysteinase OS=Homo sapiens GN=AHCY PE=3 SV=1;>sp|P23526|SAHH_HUMAN Adenosylhomocysteinase OS=Homo sapiens GN=AHCY PE=1 SV=4	2	3	3	3	0	1	0	0	1	0	3	0	0	0	2	0	0	1	0	0	1	0	3	0	0	0	2	0	0	1	0	0	1	0	3	0	0	0	2	0	8.2	8.2
F5H740;Q9Y277;Q9Y277-2;E5RK27;E5RFP6;E5RJN6;E5RHZ6	F5H740;Q9Y277;Q9Y277-2;E5RK27;E5RFP6;E5RJN6;E5RHZ6	2;2;2;1;1;1;1	2;2;2;1;1;1;1	2;2;2;1;1;1;1	Voltage-dependent anion-selective channel protein 3	VDAC3	>tr|F5H740|F5H740_HUMAN Voltage-dependent anion-selective channel protein 3 OS=Homo sapiens GN=VDAC3 PE=4 SV=1;>sp|Q9Y277|VDAC3_HUMAN Voltage-dependent anion-selective channel protein 3 OS=Homo sapiens GN=VDAC3 PE=1 SV=1;>sp|Q9Y277-2|VDAC3_HUMAN Isoform 2	7	2	2	2	1	1	1	0	0	0	0	1	1	0	2	1	1	1	1	0	0	0	0	1	1	0	2	1	1	1	1	0	0	0	0	1	1	0	2	1	12	12
F5H7N9;Q08431;F5GZN3;Q08431-2;Q08431-3;H0YKS8	F5H7N9;Q08431;F5GZN3;Q08431-2;Q08431-3;H0YKS8	13;13;11;11;10;7	13;13;11;11;10;7	13;13;11;11;10;7	Lactadherin;Lactadherin short form;Medin	MFGE8	>tr|F5H7N9|F5H7N9_HUMAN Lactadherin short form OS=Homo sapiens GN=MFGE8 PE=4 SV=1;>sp|Q08431|MFGM_HUMAN Lactadherin OS=Homo sapiens GN=MFGE8 PE=1 SV=2;>tr|F5GZN3|F5GZN3_HUMAN Lactadherin short form OS=Homo sapiens GN=MFGE8 PE=4 SV=1;>sp|Q08431-2|MFGM_HUMAN	6	13	13	13	12	10	10	7	3	5	4	4	6	10	10	7	12	10	10	7	3	5	4	4	6	10	10	7	12	10	10	7	3	5	4	4	6	10	10	7	45.6	45.6
F5H7V7;P51970	F5H7V7;P51970	1;1	1;1	1;1	NADH dehydrogenase [ubiquinone] 1 alpha subcomplex subunit 8	NDUFA8	>tr|F5H7V7|F5H7V7_HUMAN NADH dehydrogenase [ubiquinone] 1 alpha subcomplex subunit 8 OS=Homo sapiens GN=NDUFA8 PE=4 SV=1;>sp|P51970|NDUA8_HUMAN NADH dehydrogenase [ubiquinone] 1 alpha subcomplex subunit 8 OS=Homo sapiens GN=NDUFA8 PE=1 SV=3	2	1	1	1	0	0	0	0	0	0	0	0	0	0	0	1	0	0	0	0	0	0	0	0	0	0	0	1	0	0	0	0	0	0	0	0	0	0	0	1	14.1	14.1
F5H872;Q13503	F5H872;Q13503	2;2	2;2	2;2	Mediator of RNA polymerase II transcription subunit 21	MED21	>tr|F5H872|F5H872_HUMAN Mediator of RNA polymerase II transcription subunit 21 OS=Homo sapiens GN=MED21 PE=4 SV=1;>sp|Q13503|MED21_HUMAN Mediator of RNA polymerase II transcription subunit 21 OS=Homo sapiens GN=MED21 PE=1 SV=1	2	2	2	2	2	2	2	2	2	2	1	2	2	2	1	2	2	2	2	2	2	2	1	2	2	2	1	2	2	2	2	2	2	2	1	2	2	2	1	2	21.4	21.4
F5H897;Q12931	F5H897;Q12931	1;1	1;1	1;1	Heat shock protein 75 kDa, mitochondrial	TRAP1	>tr|F5H897|F5H897_HUMAN Heat shock protein 75 kDa, mitochondrial OS=Homo sapiens GN=TRAP1 PE=3 SV=1;>sp|Q12931|TRAP1_HUMAN Heat shock protein 75 kDa, mitochondrial OS=Homo sapiens GN=TRAP1 PE=1 SV=3	2	1	1	1	0	0	0	0	0	0	0	1	0	0	0	0	0	0	0	0	0	0	0	1	0	0	0	0	0	0	0	0	0	0	0	1	0	0	0	0	2.3	2.3
F5H8F7;Q9UBL3-2;Q9UBL3-3;Q9UBL3	F5H8F7;Q9UBL3-2;Q9UBL3-3;Q9UBL3	3;3;3;3	3;3;3;3	3;3;3;3	Set1/Ash2 histone methyltransferase complex subunit ASH2	ASH2L	>tr|F5H8F7|F5H8F7_HUMAN Set1/Ash2 histone methyltransferase complex subunit ASH2 OS=Homo sapiens GN=ASH2L PE=4 SV=1;>sp|Q9UBL3-2|ASH2L_HUMAN Isoform 2 of Set1/Ash2 histone methyltransferase complex subunit ASH2 OS=Homo sapiens GN=ASH2L;>sp|Q9UBL3-3|ASH2L_H	4	3	3	3	2	2	3	2	2	2	2	1	2	1	2	1	2	2	3	2	2	2	2	1	2	1	2	1	2	2	3	2	2	2	2	1	2	1	2	1	6.7	6.7
I3L0E1;F5H8G8;P85037-2;P85037;E9PM37;E9PPI7;F5H5V5;Q01167-2;Q01167	I3L0E1;F5H8G8;P85037-2;P85037;E9PM37;E9PPI7;F5H5V5;Q01167-2;Q01167	2;2;2;2;1;1;1;1;1	2;2;2;2;1;1;1;1;1	2;2;2;2;1;1;1;1;1	Forkhead box protein K1;Forkhead box protein K2	FOXK1;FOXK2	>tr|I3L0E1|I3L0E1_HUMAN Forkhead box protein K1 OS=Homo sapiens GN=FOXK1 PE=4 SV=1;>tr|F5H8G8|F5H8G8_HUMAN Forkhead box protein K1 OS=Homo sapiens GN=FOXK1 PE=4 SV=1;>sp|P85037-2|FOXK1_HUMAN Isoform 2 of Forkhead box protein K1 OS=Homo sapiens GN=FOXK1;>sp	9	2	2	2	1	0	2	0	1	2	1	2	2	0	0	1	1	0	2	0	1	2	1	2	2	0	0	1	1	0	2	0	1	2	1	2	2	0	0	1	4.1	4.1
F5H8K1;Q9NRW7;Q5T4Q0;F5GYC3;B7Z5E4	F5H8K1;Q9NRW7;Q5T4Q0;F5GYC3;B7Z5E4	2;2;1;1;1	2;2;1;1;1	2;2;1;1;1	Vacuolar protein sorting-associated protein 45	VPS45	>tr|F5H8K1|F5H8K1_HUMAN Vacuolar protein sorting-associated protein 45 OS=Homo sapiens GN=VPS45 PE=4 SV=1;>sp|Q9NRW7|VPS45_HUMAN Vacuolar protein sorting-associated protein 45 OS=Homo sapiens GN=VPS45 PE=1 SV=1;>tr|Q5T4Q0|Q5T4Q0_HUMAN Vacuolar protein sort	5	2	2	2	0	2	1	2	1	1	1	1	1	0	1	2	0	2	1	2	1	1	1	1	1	0	1	2	0	2	1	2	1	1	1	1	1	0	1	2	4.8	4.8
F5H8K4;O43242;B4DT72	F5H8K4;O43242;B4DT72	2;2;1	2;2;1	2;2;1	26S proteasome non-ATPase regulatory subunit 3	PSMD3	>tr|F5H8K4|F5H8K4_HUMAN 26S proteasome non-ATPase regulatory subunit 3 OS=Homo sapiens GN=PSMD3 PE=4 SV=1;>sp|O43242|PSMD3_HUMAN 26S proteasome non-ATPase regulatory subunit 3 OS=Homo sapiens GN=PSMD3 PE=1 SV=2;>tr|B4DT72|B4DT72_HUMAN 26S proteasome non-AT	3	2	2	2	0	0	2	0	0	0	1	0	0	0	0	0	0	0	2	0	0	0	1	0	0	0	0	0	0	0	2	0	0	0	1	0	0	0	0	0	4.6	4.6
H0YCY8;F5HGG6;P53634	H0YCY8;F5HGG6;P53634	1;1;1	1;1;1	1;1;1	Dipeptidyl peptidase 1;Dipeptidyl peptidase 1 exclusion domain chain;Dipeptidyl peptidase 1 heavy chain;Dipeptidyl peptidase 1 light chain	CTSC	>tr|H0YCY8|H0YCY8_HUMAN Dipeptidyl peptidase 1 light chain (Fragment) OS=Homo sapiens GN=CTSC PE=4 SV=1;>tr|F5HGG6|F5HGG6_HUMAN Dipeptidyl peptidase 1 light chain OS=Homo sapiens GN=CTSC PE=3 SV=1;>sp|P53634|CATC_HUMAN Dipeptidyl peptidase 1 OS=Homo sapien	3	1	1	1	1	1	1	1	1	1	0	1	1	1	1	1	1	1	1	1	1	1	0	1	1	1	1	1	1	1	1	1	1	1	0	1	1	1	1	1	4.9	4.9
H7C1L3;F6RU81;Q6PJG2	H7C1L3;F6RU81;Q6PJG2	2;2;2	2;2;2	2;2;2	ELM2 and SANT domain-containing protein 1	ELMSAN1	>tr|H7C1L3|H7C1L3_HUMAN Uncharacterized protein C14orf43 (Fragment) OS=Homo sapiens GN=C14orf43 PE=4 SV=1;>tr|F6RU81|F6RU81_HUMAN Uncharacterized protein C14orf43 (Fragment) OS=Homo sapiens GN=C14orf43 PE=4 SV=1;>sp|Q6PJG2|CN043_HUMAN Uncharacterized prote	3	2	2	2	0	0	2	0	0	1	0	1	1	1	1	0	0	0	2	0	0	1	0	1	1	1	1	0	0	0	2	0	0	1	0	1	1	1	1	0	7.6	7.6
F6S0T5;O60341;O60341-2	F6S0T5;O60341;O60341-2	6;6;6	6;6;6	6;6;6	Lysine-specific histone demethylase 1A	KDM1A	>tr|F6S0T5|F6S0T5_HUMAN Lysine-specific histone demethylase 1A OS=Homo sapiens GN=KDM1A PE=4 SV=1;>sp|O60341|KDM1A_HUMAN Lysine-specific histone demethylase 1A OS=Homo sapiens GN=KDM1A PE=1 SV=2;>sp|O60341-2|KDM1A_HUMAN Isoform 2 of Lysine-specific histone	3	6	6	6	4	2	4	2	4	3	3	5	3	3	2	2	4	2	4	2	4	3	3	5	3	3	2	2	4	2	4	2	4	3	3	5	3	3	2	2	10.4	10.4
F6SS63;Q8N5C8-2;Q8N5C8	F6SS63;Q8N5C8-2;Q8N5C8	1;1;1	1;1;1	1;1;1	TGF-beta-activated kinase 1 and MAP3K7-binding protein 3	TAB3	>tr|F6SS63|F6SS63_HUMAN TGF-beta-activated kinase 1 and MAP3K7-binding protein 3 OS=Homo sapiens GN=TAB3 PE=4 SV=1;>sp|Q8N5C8-2|TAB3_HUMAN Isoform 2 of TGF-beta-activated kinase 1 and MAP3K7-binding protein 3 OS=Homo sapiens GN=TAB3;>sp|Q8N5C8|TAB3_HUMAN T	3	1	1	1	1	1	1	1	1	0	1	1	1	1	1	1	1	1	1	1	1	0	1	1	1	1	1	1	1	1	1	1	1	0	1	1	1	1	1	1	1.3	1.3
F8VSK3;F8VNW9;F8VWH6;P40425;H0YI03;H0YNB6;H0Y5D0	F8VSK3;F8VNW9;F8VWH6;P40425;H0YI03	8;8;8;8;6;1;1	8;8;8;8;6;1;1	6;6;6;6;4;0;0	Pre-B-cell leukemia transcription factor 2	PBX2	>tr|F8VSK3|F8VSK3_HUMAN Pre-B-cell leukemia transcription factor 2 OS=Homo sapiens GN=PBX2 PE=3 SV=1;>tr|F8VNW9|F8VNW9_HUMAN Pre-B-cell leukemia transcription factor 2 OS=Homo sapiens GN=PBX2 PE=3 SV=1;>tr|F8VWH6|F8VWH6_HUMAN Pre-B-cell leukemia transcript	7	8	8	6	0	2	6	3	7	6	5	7	6	2	4	4	0	2	6	3	7	6	5	7	6	2	4	4	0	2	5	3	5	4	4	6	5	2	4	4	33.3	33.3
F8VPD4;P27708;H7C2E4	F8VPD4;P27708	6;6;1	6;6;1	6;6;1	CAD protein;Glutamine-dependent carbamoyl-phosphate synthase;Aspartate carbamoyltransferase;Dihydroorotase	CAD	>tr|F8VPD4|F8VPD4_HUMAN Dihydroorotase OS=Homo sapiens GN=CAD PE=3 SV=1;>sp|P27708|PYR1_HUMAN CAD protein OS=Homo sapiens GN=CAD PE=1 SV=3	3	6	6	6	3	4	4	3	1	3	3	3	2	1	1	1	3	4	4	3	1	3	3	3	2	1	1	1	3	4	4	3	1	3	3	3	2	1	1	1	3.5	3.5
Q5STU3;F8VQ10;O00148;Q13838;Q13838-2;F6QWI5;F6U6E2;F6S2B7;F6SXL5;E7EMX2;F8W0J0;H0Y400;F6V772;F6QYI9;F6R6M7;F6S4E6;F6UN21;F6TRA5;B1Q2N1;F6WLT2;F8VZL8;H0Y7X6;H0Y7G4;B4DP52;Q8N5M0	Q5STU3;F8VQ10;O00148;Q13838;Q13838-2;F6QWI5;F6U6E2;F6S2B7;F6SXL5;E7EMX2;F8W0J0;H0Y400;F6V772;F6QYI9;F6R6M7;F6S4E6;F6UN21;F6TRA5;B1Q2N1;F6WLT2;F8VZL8;H0Y7X6;H0Y7G4;B4DP52;Q8N5M0	2;2;2;2;2;1;1;1;1;1;1;1;1;1;1;1;1;1;1;1;1;1;1;1;1	2;2;2;2;2;1;1;1;1;1;1;1;1;1;1;1;1;1;1;1;1;1;1;1;1	2;2;2;2;2;1;1;1;1;1;1;1;1;1;1;1;1;1;1;1;1;1;1;1;1	ATP-dependent RNA helicase DDX39A;Spliceosome RNA helicase DDX39B	DDX39B;DDX39A;DDX39;hCG_2005638	>tr|Q5STU3|Q5STU3_HUMAN HLA-B associated transcript 1 OS=Homo sapiens GN=BAT1 PE=2 SV=2;>tr|F8VQ10|F8VQ10_HUMAN Spliceosome RNA helicase DDX39B OS=Homo sapiens GN=DDX39B PE=4 SV=1;>sp|O00148|DX39A_HUMAN ATP-dependent RNA helicase DDX39A OS=Homo sapiens GN=	25	2	2	2	1	0	1	0	1	1	2	0	0	2	0	1	1	0	1	0	1	1	2	0	0	2	0	1	1	0	1	0	1	1	2	0	0	2	0	1	4.7	4.7
F8VXY0;F8VRQ1;F8W6I7;P09651-3;P09651-2;P09651;F8VSB5;F8W1S7;F8VZ49;Q32P51;F8VTQ5;F8W646;H0YH80;F8VYN5	F8VXY0;F8VRQ1;F8W6I7;P09651-3;P09651-2;P09651;F8VSB5;F8W1S7;F8VZ49;Q32P51;F8VTQ5	14;14;14;14;14;14;13;13;10;10;8;6;6;5	14;14;14;14;14;14;13;13;10;10;8;6;6;5	14;14;14;14;14;14;13;13;10;10;8;6;6;5	Heterogeneous nuclear ribonucleoprotein A1;Heterogeneous nuclear ribonucleoprotein A1, N-terminally processed;Heterogeneous nuclear ribonucleoprotein A1-like 2	HNRNPA1;HNRNPA1L2	>tr|F8VXY0|F8VXY0_HUMAN Heterogeneous nuclear ribonucleoprotein A1 OS=Homo sapiens GN=HNRNPA1 PE=4 SV=1;>tr|F8VRQ1|F8VRQ1_HUMAN Heterogeneous nuclear ribonucleoprotein A1 OS=Homo sapiens GN=HNRNPA1 PE=4 SV=1;>tr|F8W6I7|F8W6I7_HUMAN Heterogeneous nuclear ri	14	14	14	14	12	11	11	10	11	8	11	10	7	9	9	11	12	11	11	10	11	8	11	10	7	9	9	11	12	11	11	10	11	8	11	10	7	9	9	11	55.3	55.3
F8VV32;P61626	F8VV32;P61626	2;2	2;2	2;2	Lysozyme C	LYZ	>tr|F8VV32|F8VV32_HUMAN Lysozyme C OS=Homo sapiens GN=LYZ PE=3 SV=1;>sp|P61626|LYSC_HUMAN Lysozyme C OS=Homo sapiens GN=LYZ PE=1 SV=1	2	2	2	2	1	1	1	1	1	1	1	0	1	0	2	1	1	1	1	1	1	1	1	0	1	0	2	1	1	1	1	1	1	1	1	0	1	0	2	1	23.1	23.1
Q5JP53;F8VYX6;F8VW92;P07437;Q5ST81;F8VUJ7;E7EWR1;F5H894;E9PBJ4;G3V5W4;G3V2R8;G3V3R4;G3V2N6	Q5JP53;F8VYX6;F8VW92;P07437;Q5ST81;F8VUJ7;E7EWR1;F5H894	24;24;24;24;21;21;18;13;11;1;1;1;1	5;5;5;5;2;5;2;1;4;1;1;1;1	4;4;4;4;2;4;2;1;3;0;0;0;0	Tubulin beta chain	TUBB	>tr|Q5JP53|Q5JP53_HUMAN Tubulin beta chain OS=Homo sapiens GN=TUBB PE=3 SV=1;>tr|F8VYX6|F8VYX6_HUMAN Tubulin beta chain OS=Homo sapiens GN=TUBB PE=3 SV=1;>tr|F8VW92|F8VW92_HUMAN Tubulin beta chain OS=Homo sapiens GN=TUBB PE=3 SV=1;>sp|P07437|TBB5_HUMAN Tub	13	24	5	4	20	22	22	21	19	19	19	20	20	16	19	20	5	5	5	5	5	5	4	5	5	4	3	4	4	4	4	4	4	4	3	4	4	3	2	3	65.5	20.4
F8VY47	F8VY47	1	1	1		GBX2	>tr|F8VY47|F8VY47_HUMAN Homeobox protein GBX-2 OS=Homo sapiens GN=GBX2 PE=4 SV=1	1	1	1	1	1	1	1	1	1	1	1	1	1	1	1	1	1	1	1	1	1	1	1	1	1	1	1	1	1	1	1	1	1	1	1	1	1	1	1	1	5.9	5.9
F8VZY9;P05783	F8VZY9;P05783	6;6	4;4	3;3	Keratin, type I cytoskeletal 18	KRT18	>tr|F8VZY9|F8VZY9_HUMAN Keratin, type I cytoskeletal 18 OS=Homo sapiens GN=KRT18 PE=3 SV=1;>sp|P05783|K1C18_HUMAN Keratin, type I cytoskeletal 18 OS=Homo sapiens GN=KRT18 PE=1 SV=2	2	6	4	3	3	3	3	5	4	4	5	4	2	3	4	6	1	1	2	3	2	2	3	2	0	1	2	4	1	1	1	2	1	2	2	2	0	1	2	3	17.1	13
F8W0B5	F8W0B5	11	1	0		ATXN2	>tr|F8W0B5|F8W0B5_HUMAN Ataxin-2 (Fragment) OS=Homo sapiens GN=ATXN2 PE=4 SV=1	1	11	1	0	11	10	10	11	10	10	10	10	10	9	7	9	1	1	0	1	1	1	1	1	1	1	0	0	0	0	0	0	0	0	0	0	0	0	0	0	67.5	6.9
I3L0B9;F8W0W3;Q5ST30;F5GXJ0;F8VZ59;F5H323	I3L0B9;F8W0W3;Q5ST30;F5GXJ0;F8VZ59;F5H323	42;42;41;41;35;34	42;42;41;41;35;34	2;2;1;1;2;1	Valine--tRNA ligase, mitochondrial	VARS2	>tr|I3L0B9|I3L0B9_HUMAN Valine--tRNA ligase, mitochondrial OS=Homo sapiens GN=VARS2 PE=4 SV=1;>tr|F8W0W3|F8W0W3_HUMAN Valine--tRNA ligase, mitochondrial OS=Homo sapiens GN=VARS2 PE=3 SV=1;>sp|Q5ST30|SYVM_HUMAN Valine--tRNA ligase, mitochondrial OS=Homo sap	6	42	42	2	36	41	39	34	39	39	41	39	36	38	39	39	36	41	39	34	39	39	41	39	36	38	39	39	1	2	2	1	2	2	2	2	2	1	2	2	51.5	51.5
F8W126;Q7Z372;Q96EZ8-3;Q96EZ8;Q96EZ8-2	F8W126;Q7Z372;Q96EZ8-3;Q96EZ8;Q96EZ8-2	1;1;1;1;1	1;1;1;1;1	1;1;1;1;1	Microspherule protein 1	MCRS1	>tr|F8W126|F8W126_HUMAN Microspherule protein 1 (Fragment) OS=Homo sapiens GN=MCRS1 PE=4 SV=1;>tr|Q7Z372|Q7Z372_HUMAN Microspherule protein 1 OS=Homo sapiens GN=DKFZp686N07218 PE=2 SV=1;>sp|Q96EZ8-3|MCRS1_HUMAN Isoform 3 of Microspherule protein 1 OS=Homo	5	1	1	1	0	1	1	0	0	0	1	1	1	1	1	0	0	1	1	0	0	0	1	1	1	1	1	0	0	1	1	0	0	0	1	1	1	1	1	0	5.7	5.7
F8W1U0;F8W130;Q12815	F8W1U0;F8W130;Q12815	2;2;2	2;2;2	2;2;2	Tastin	TROAP	>tr|F8W1U0|F8W1U0_HUMAN Tastin OS=Homo sapiens GN=TROAP PE=4 SV=1;>tr|F8W130|F8W130_HUMAN Tastin OS=Homo sapiens GN=TROAP PE=4 SV=1;>sp|Q12815|TROAP_HUMAN Tastin OS=Homo sapiens GN=TROAP PE=1 SV=3	3	2	2	2	0	1	1	0	0	0	0	0	0	0	0	0	0	1	1	0	0	0	0	0	0	0	0	0	0	1	1	0	0	0	0	0	0	0	0	0	6.3	6.3
F8W181;Q02878;F8VZ45;F8VR69;F8VZA3;F8VWR1	F8W181;Q02878	17;17;5;3;2;2	17;17;5;3;2;2	17;17;5;3;2;2	60S ribosomal protein L6	RPL6	>tr|F8W181|F8W181_HUMAN 60S ribosomal protein L6 (Fragment) OS=Homo sapiens GN=RPL6 PE=3 SV=1;>sp|Q02878|RL6_HUMAN 60S ribosomal protein L6 OS=Homo sapiens GN=RPL6 PE=1 SV=3	6	17	17	17	15	11	14	14	14	10	15	14	13	13	10	12	15	11	14	14	14	10	15	14	13	13	10	12	15	11	14	14	14	10	15	14	13	13	10	12	60.2	60.2
P51148;F8W1H5;F8WC93;F8WCY6;F8WD79;F8VPW9;F8VSF8;F8VWZ7;F8VWU4;F8VVZ0;F8VUA5;F8VVK3;B4DKD7;B4DJA5;P61020;P20339	P51148;F8W1H5;F8WC93;F8WCY6;F8WD79;F8VPW9;F8VSF8;F8VWZ7;F8VWU4;F8VVZ0;F8VUA5;F8VVK3;B4DKD7;B4DJA5;P61020;P20339	2;2;1;1;1;1;1;1;1;1;1;1;1;1;1;1	2;2;1;1;1;1;1;1;1;1;1;1;1;1;1;1	2;2;1;1;1;1;1;1;1;1;1;1;1;1;1;1	Ras-related protein Rab-5C;Ras-related protein Rab-5B;Ras-related protein Rab-5A	RAB5C;RAB5A;RAB5B	>sp|P51148|RAB5C_HUMAN Ras-related protein Rab-5C OS=Homo sapiens GN=RAB5C PE=1 SV=2;>tr|F8W1H5|F8W1H5_HUMAN Ras-related protein Rab-5C OS=Homo sapiens GN=RAB5C PE=3 SV=1;>tr|F8WC93|F8WC93_HUMAN Ras-related protein Rab-5A OS=Homo sapiens GN=RAB5A PE=4 SV=1	16	2	2	2	1	0	0	1	0	0	0	0	0	0	2	0	1	0	0	1	0	0	0	0	0	0	2	0	1	0	0	1	0	0	0	0	0	0	2	0	10.6	10.6
F8W1R7;G3V1V0;P60660-2;P60660;F8VZV5;G8JLA2;B7Z6Z4;G3V1Y7;F8VPF3;F8VZU9;F8W180;H0YI43;F8W1I5;P14649;F8VXL3	F8W1R7;G3V1V0;P60660-2;P60660;F8VZV5;G8JLA2;B7Z6Z4;G3V1Y7;F8VPF3	7;7;7;7;6;6;6;5;5;3;3;2;2;2;1	7;7;7;7;6;6;6;5;5;3;3;2;2;2;1	7;7;7;7;6;6;6;5;5;3;3;2;2;2;1	Myosin light polypeptide 6	PDE6H;MYL6	>tr|F8W1R7|F8W1R7_HUMAN Myosin light polypeptide 6 OS=Homo sapiens GN=MYL6 PE=4 SV=1;>tr|G3V1V0|G3V1V0_HUMAN Myosin light polypeptide 6 OS=Homo sapiens GN=MYL6 PE=4 SV=1;>sp|P60660-2|MYL6_HUMAN Isoform Smooth muscle of Myosin light polypeptide 6 OS=Homo sa	15	7	7	7	3	3	4	7	5	3	3	3	2	3	4	5	3	3	4	7	5	3	3	3	2	3	4	5	3	3	4	7	5	3	3	3	2	3	4	5	56.6	56.6
P04920-2;F8W682;P04920;C9JVC2;C9J722;C9J035;C9J9M9;C9J459	P04920-2;F8W682;P04920	10;10;10;2;2;2;2;1	10;10;10;2;2;2;2;1	10;10;10;2;2;2;2;1	Anion exchange protein 2	SLC4A2	>sp|P04920-2|B3A2_HUMAN Isoform B1 of Anion exchange protein 2 OS=Homo sapiens GN=SLC4A2;>tr|F8W682|F8W682_HUMAN Anion exchange protein 2 OS=Homo sapiens GN=SLC4A2 PE=4 SV=1;>sp|P04920|B3A2_HUMAN Anion exchange protein 2 OS=Homo sapiens GN=SLC4A2 PE=1 SV=4	8	10	10	10	9	8	9	4	6	5	6	4	4	6	5	9	9	8	9	4	6	5	6	4	4	6	5	9	9	8	9	4	6	5	6	4	4	6	5	9	10.8	10.8
O43439-2;F8W6D7;O43439;O43439-4;B4DFM9;Q68DC6;E5RG85;Q5TGE8;E5RHJ8;E7ETA8;H3BNH2;B5MDT7;E7EU24;O43439-3;Q7Z4J5;O75081-2;Q06455-2;O75081-4;Q06455;E7EPN4;O75081	O43439-2;F8W6D7;O43439;O43439-4;B4DFM9	8;8;8;8;7;3;1;1;1;1;1;1;1;1;1;1;1;1;1;1;1	8;8;8;8;7;3;1;1;1;1;1;1;1;1;1;1;1;1;1;1;1	8;8;8;8;7;3;1;1;1;1;1;1;1;1;1;1;1;1;1;1;1	Protein CBFA2T2	CBFA2T2	>sp|O43439-2|MTG8R_HUMAN Isoform 2 of Protein CBFA2T2 OS=Homo sapiens GN=CBFA2T2;>tr|F8W6D7|F8W6D7_HUMAN Protein CBFA2T2 OS=Homo sapiens GN=CBFA2T2 PE=4 SV=1;>sp|O43439|MTG8R_HUMAN Protein CBFA2T2 OS=Homo sapiens GN=CBFA2T2 PE=1 SV=1;>sp|O43439-4|MTG8R_HUM	21	8	8	8	1	2	4	2	4	5	8	4	6	3	3	3	1	2	4	2	4	5	8	4	6	3	3	3	1	2	4	2	4	5	8	4	6	3	3	3	15.8	15.8
F8W6H1;Q8IZD2-5;Q8IZD2-2;Q8IZD2-7;Q8IZD2;Q8IZD2-6;E7ETZ7;Q8IZD2-4;H7C4F3;C9JYI9;H7C1F2;F5H3V7;Q8IZD2-3	F8W6H1;Q8IZD2-5;Q8IZD2-2;Q8IZD2-7;Q8IZD2;Q8IZD2-6;E7ETZ7	13;13;13;13;13;12;8;4;1;1;1;1;1	13;13;13;13;13;12;8;4;1;1;1;1;1	12;12;12;12;12;11;7;4;1;1;0;1;1	Histone-lysine N-methyltransferase 2E	KMT2E	>tr|F8W6H1|F8W6H1_HUMAN Histone-lysine N-methyltransferase MLL5 OS=Homo sapiens GN=MLL5 PE=4 SV=1;>sp|Q8IZD2-5|MLL5_HUMAN Isoform 5 of Histone-lysine N-methyltransferase MLL5 OS=Homo sapiens GN=MLL5;>sp|Q8IZD2-2|MLL5_HUMAN Isoform 2 of Histone-lysine N-met	13	13	13	12	1	2	5	4	9	6	10	9	4	1	0	3	1	2	5	4	9	6	10	9	4	1	0	3	1	2	5	4	9	6	9	8	4	1	0	3	9.8	9.8
Q9NQB0-10;F8W742;Q9NQB0-9;Q9NQB0-4;Q9NQB0-6;F8W7T5;Q9NQB0-2;Q9NQB0-8;Q9NQB0-7;Q9NQB0-5;Q9NQB0-3;Q9NQB0;H0YAR8;Q5JRY4;H0YBC8;Q5JRY5;D4PHA3;B7WNT5;G8JLE2;P36402-10;P36402-14;P36402-16;P36402-8;P36402-6;P36402-2;Q9UJU2-3;E9PDK3;E2GH20;P36402-9;P36402-13;P36402-15;Q9UJU2-5;P36402-12;P36402-4;P36402-7;P36402-5;P36402;Q9UJU2-6;Q9UJU2;P36402-11;P36402-3;Q9HCS4;H0YBP2;H0YEE5;Q5JRY3;E5RHL1;Q5VVR5;Q5VVR8;Q…	Q9NQB0-10;F8W742;Q9NQB0-9;Q9NQB0-4;Q9NQB0-6;F8W7T5;Q9NQB0-2;Q9NQB0-8;Q9NQB0-7;Q9NQB0-5;Q9NQB0-3;Q9NQB0;H0YAR8;Q5JRY4;H0YBC8;Q5JRY5;D4PHA3;B7WNT5;G8JLE2;P36402-10;P36402-14;P36402-16;P36402-8;P36402-6;P36402-2;Q9UJU2-3;E9PDK3;E2GH20;P36402-9;P36402-13;P36402-15;Q9UJU2-5;P36402-12;P36402-4;P36402-7;P36402-5;P36402;Q9UJU2-6;Q9UJU2;P36402-11;P36402-3;Q9HCS4	3;3;3;3;3;3;3;3;3;3;3;3;2;2;2;2;2;2;2;2;2;2;2;2;2;2;2;2;2;2;2;2;2;2;2;2;2;2;2;2;2;2;1;1;1;1;1;1;1	3;3;3;3;3;3;3;3;3;3;3;3;2;2;2;2;2;2;2;2;2;2;2;2;2;2;2;2;2;2;2;2;2;2;2;2;2;2;2;2;2;2;1;1;1;1;1;1;1	3;3;3;3;3;3;3;3;3;3;3;3;2;2;2;2;2;2;2;2;2;2;2;2;2;2;2;2;2;2;2;2;2;2;2;2;2;2;2;2;2;2;1;1;1;1;1;1;1	Transcription factor 7-like 2;Transcription factor 7;Lymphoid enhancer-binding factor 1;Transcription factor 7-like 1	TCF7L2;TCF7;LEF1;TCF7L1	>sp|Q9NQB0-10|TF7L2_HUMAN Isoform 10 of Transcription factor 7-like 2 OS=Homo sapiens GN=TCF7L2;>tr|F8W742|F8W742_HUMAN Transcription factor 7-like 2 OS=Homo sapiens GN=TCF7L2 PE=4 SV=1;>sp|Q9NQB0-9|TF7L2_HUMAN Isoform 9 of Transcription factor 7-like 2 OS	49	3	3	3	2	0	0	1	3	2	2	3	0	0	1	1	2	0	0	1	3	2	2	3	0	0	1	1	2	0	0	1	3	2	2	3	0	0	1	1	7.9	7.9
F8W7H0;Q9NZJ7-2;Q9NZJ7;Q5TDC2;H0Y8C3;Q9NZJ7-3;B4E0C5;H7C196	F8W7H0;Q9NZJ7-2;Q9NZJ7;Q5TDC2;H0Y8C3	7;7;7;6;6;3;2;1	7;7;7;6;6;3;2;1	7;7;7;6;6;3;2;1	Mitochondrial carrier homolog 1	MTCH1	>tr|F8W7H0|F8W7H0_HUMAN Mitochondrial carrier homolog 1 OS=Homo sapiens GN=MTCH1 PE=3 SV=1;>sp|Q9NZJ7-2|MTCH1_HUMAN Isoform 2 of Mitochondrial carrier homolog 1 OS=Homo sapiens GN=MTCH1;>sp|Q9NZJ7|MTCH1_HUMAN Mitochondrial carrier homolog 1 OS=Homo sapiens	8	7	7	7	6	5	5	3	2	3	3	4	5	6	5	5	6	5	5	3	2	3	3	4	5	6	5	5	6	5	5	3	2	3	3	4	5	6	5	5	23.4	23.4
F8W7I9;P46060	F8W7I9;P46060	1;1	1;1	1;1	Ran GTPase-activating protein 1	RANGAP1	>tr|F8W7I9|F8W7I9_HUMAN Ran GTPase-activating protein 1 OS=Homo sapiens GN=RANGAP1 PE=4 SV=1;>sp|P46060|RAGP1_HUMAN Ran GTPase-activating protein 1 OS=Homo sapiens GN=RANGAP1 PE=1 SV=1	2	1	1	1	0	0	1	0	0	0	0	0	0	0	0	0	0	0	1	0	0	0	0	0	0	0	0	0	0	0	1	0	0	0	0	0	0	0	0	0	2.4	2.4
F8W7Q4;Q96A26	F8W7Q4;Q96A26	1;1	1;1	1;1	Protein FAM162A	FAM162A	>tr|F8W7Q4|F8W7Q4_HUMAN Protein FAM162A OS=Homo sapiens GN=FAM162A PE=4 SV=1;>sp|Q96A26|F162A_HUMAN Protein FAM162A OS=Homo sapiens GN=FAM162A PE=1 SV=2	2	1	1	1	0	0	0	0	0	0	0	0	0	1	1	1	0	0	0	0	0	0	0	0	0	1	1	1	0	0	0	0	0	0	0	0	0	1	1	1	7.6	7.6
F8W7R4;Q8NEM8-2;Q8NEM8-4;Q8NEM8	F8W7R4;Q8NEM8-2;Q8NEM8-4;Q8NEM8	1;1;1;1	1;1;1;1	1;1;1;1	Cytosolic carboxypeptidase 3	AGBL3	>tr|F8W7R4|F8W7R4_HUMAN Cytosolic carboxypeptidase 3 OS=Homo sapiens GN=AGBL3 PE=4 SV=1;>sp|Q8NEM8-2|CBPC3_HUMAN Isoform 2 of Cytosolic carboxypeptidase 3 OS=Homo sapiens GN=AGBL3;>sp|Q8NEM8-4|CBPC3_HUMAN Isoform 4 of Cytosolic carboxypeptidase 3 OS=Homo s	4	1	1	1	0	0	0	0	0	1	0	0	1	1	1	1	0	0	0	0	0	1	0	0	1	1	1	1	0	0	0	0	0	1	0	0	1	1	1	1	1.3	1.3
F8W914;Q9NQC3-2;Q9NQC3-5;Q9NQC3;H7C106;F8WAM4;Q9NQC3-3;Q9NQC3-4;Q9NQC3-6	F8W914;Q9NQC3-2;Q9NQC3-5;Q9NQC3;H7C106;F8WAM4;Q9NQC3-3;Q9NQC3-4;Q9NQC3-6	4;4;4;4;2;2;2;2;2	4;4;4;4;2;2;2;2;2	4;4;4;4;2;2;2;2;2	Reticulon;Reticulon-4	RTN4	>tr|F8W914|F8W914_HUMAN Reticulon-4 OS=Homo sapiens GN=RTN4 PE=4 SV=1;>sp|Q9NQC3-2|RTN4_HUMAN Isoform 2 of Reticulon-4 OS=Homo sapiens GN=RTN4;>sp|Q9NQC3-5|RTN4_HUMAN Isoform 5 of Reticulon-4 OS=Homo sapiens GN=RTN4;>sp|Q9NQC3|RTN4_HUMAN Reticulon-4 OS=Hom	9	4	4	4	3	3	2	4	3	4	3	3	3	4	4	4	3	3	2	4	3	4	3	3	3	4	4	4	3	3	2	4	3	4	3	3	3	4	4	4	20	20
F8W930;Q9Y6M1-1;Q9Y6M1;Q9Y6M1-5;Q9Y6M1-6;Q9Y6M1-3;Q9Y6M1-4	F8W930;Q9Y6M1-1;Q9Y6M1;Q9Y6M1-5;Q9Y6M1-6;Q9Y6M1-3;Q9Y6M1-4	8;8;8;7;7;7;7	8;8;8;7;7;7;7	7;7;7;6;6;6;6	Insulin-like growth factor 2 mRNA-binding protein 2	IGF2BP2	>tr|F8W930|F8W930_HUMAN Insulin-like growth factor 2 mRNA-binding protein 2 OS=Homo sapiens GN=IGF2BP2 PE=4 SV=1;>sp|Q9Y6M1-1|IF2B2_HUMAN Isoform 2 of Insulin-like growth factor 2 mRNA-binding protein 2 OS=Homo sapiens GN=IGF2BP2;>sp|Q9Y6M1|IF2B2_HUMAN Ins	7	8	8	7	4	4	7	7	4	3	4	4	6	7	6	6	4	4	7	7	4	3	4	4	6	7	6	6	3	4	6	6	3	2	3	3	5	6	5	5	18.2	18.2
F8W9H9;P08651;P08651-5	F8W9H9;P08651;P08651-5	13;13;12	1;1;1	1;1;1	Nuclear factor 1 C-type	NFIC	>tr|F8W9H9|F8W9H9_HUMAN Nuclear factor 1 OS=Homo sapiens GN=NFIC PE=3 SV=1;>sp|P08651|NFIC_HUMAN Nuclear factor 1 C-type OS=Homo sapiens GN=NFIC PE=1 SV=2;>sp|P08651-5|NFIC_HUMAN Isoform 5 of Nuclear factor 1 C-type OS=Homo sapiens GN=NFIC	3	13	1	1	4	5	9	7	9	6	8	11	9	5	7	7	0	1	1	1	1	0	1	0	1	1	1	1	0	1	1	1	1	0	1	0	1	1	1	1	38.4	4.9
F8W9R9;O75448-2;O75448;F5H5K2;F5H0K1;F5H2D6;F5H3E6;E9PFL1;F5GY88;H0Y4Q9;F5H0M2	F8W9R9;O75448-2;O75448;F5H5K2;F5H0K1	14;14;14;13;11;6;5;3;2;2;1	14;14;14;13;11;6;5;3;2;2;1	14;14;14;13;11;6;5;3;2;2;1	Mediator of RNA polymerase II transcription subunit 24	MED24	>tr|F8W9R9|F8W9R9_HUMAN Mediator of RNA polymerase II transcription subunit 24 OS=Homo sapiens GN=MED24 PE=4 SV=1;>sp|O75448-2|MED24_HUMAN Isoform 2 of Mediator of RNA polymerase II transcription subunit 24 OS=Homo sapiens GN=MED24;>sp|O75448|MED24_HUMAN M	11	14	14	14	11	9	6	6	9	8	9	7	8	8	7	7	11	9	6	6	9	8	9	7	8	8	7	7	11	9	6	6	9	8	9	7	8	8	7	7	21.2	21.2
F8WA86;Q15417;E9PDU6;B4DFK6	F8WA86;Q15417;E9PDU6;B4DFK6	3;3;2;2	2;2;2;2	2;2;2;2	Calponin-3	CNN3	>tr|F8WA86|F8WA86_HUMAN Calponin-3 OS=Homo sapiens GN=CNN3 PE=4 SV=1;>sp|Q15417|CNN3_HUMAN Calponin-3 OS=Homo sapiens GN=CNN3 PE=1 SV=1;>tr|E9PDU6|E9PDU6_HUMAN Calponin-3 (Fragment) OS=Homo sapiens GN=CNN3 PE=4 SV=1;>tr|B4DFK6|B4DFK6_HUMAN Calponin-3 OS=Ho	4	3	2	2	1	1	1	2	1	2	2	1	1	1	1	2	0	0	0	1	0	1	1	0	0	0	0	1	0	0	0	1	0	1	1	0	0	0	0	1	13.4	9.5
F8WAH7;Q96TC7;H0YNE5;H0YLG5;H0YMB1;Q96TC7-2	F8WAH7;Q96TC7;H0YNE5;H0YLG5	3;3;2;2;1;1	3;3;2;2;1;1	3;3;2;2;1;1	Regulator of microtubule dynamics protein 3	RMDN3	>tr|F8WAH7|F8WAH7_HUMAN Regulator of microtubule dynamics protein 3 OS=Homo sapiens GN=FAM82A2 PE=4 SV=1;>sp|Q96TC7|RMD3_HUMAN Regulator of microtubule dynamics protein 3 OS=Homo sapiens GN=FAM82A2 PE=1 SV=2;>tr|H0YNE5|H0YNE5_HUMAN Regulator of microtubule	6	3	3	3	2	2	1	1	0	2	0	0	1	3	3	3	2	2	1	1	0	2	0	0	1	3	3	3	2	2	1	1	0	2	0	0	1	3	3	3	9.3	9.3
F8WAN4;Q9P2Q2;Q5T376;Q5T378;C9J7M5;C9JA15;C9JAW0;C9JYK2;C9J6Q2	F8WAN4;Q9P2Q2	30;30;14;10;1;1;1;1;1	30;30;14;10;1;1;1;1;1	28;28;12;8;0;0;0;0;0	FERM domain-containing protein 4A	FRMD4A	>tr|F8WAN4|F8WAN4_HUMAN FERM domain-containing protein 4A OS=Homo sapiens GN=FRMD4A PE=4 SV=1;>sp|Q9P2Q2|FRM4A_HUMAN FERM domain-containing protein 4A OS=Homo sapiens GN=FRMD4A PE=1 SV=3	9	30	30	28	20	19	26	23	24	15	18	19	21	18	15	19	20	19	26	23	24	15	18	19	21	18	15	19	20	18	25	22	23	15	18	18	20	17	15	18	37.1	37.1
F8WAR6;F8WER6;O14782	F8WAR6;F8WER6;O14782	1;1;1	1;1;1	1;1;1	Kinesin-like protein KIF3C	KIF3C	>tr|F8WAR6|F8WAR6_HUMAN Kinesin-like protein KIF3C OS=Homo sapiens GN=KIF3C PE=3 SV=1;>tr|F8WER6|F8WER6_HUMAN Kinesin-like protein KIF3C OS=Homo sapiens GN=KIF3C PE=3 SV=1;>sp|O14782|KIF3C_HUMAN Kinesin-like protein KIF3C OS=Homo sapiens GN=KIF3C PE=1 SV=3	3	1	1	1	0	0	0	1	0	0	0	1	0	0	0	0	0	0	0	1	0	0	0	1	0	0	0	0	0	0	0	1	0	0	0	1	0	0	0	0	1.8	1.8
F8WB06;F8VQS0;F8VVY6;F8VZQ7;F8WB05	F8WB06	36;10;9;5;1	1;0;0;0;1	1;0;0;0;1		ATXN2	>tr|F8WB06|F8WB06_HUMAN Ataxin-2 OS=Homo sapiens GN=ATXN2 PE=4 SV=1	5	36	1	1	32	30	33	31	31	31	32	33	33	30	27	31	1	1	1	1	1	1	1	1	1	1	1	1	1	1	1	1	1	1	1	1	1	1	1	1	44.5	0.8
F8WBR5;G3V479;H0Y7A7;P62158	F8WBR5;G3V479;H0Y7A7;P62158	2;2;2;2	2;2;2;2	2;2;2;2	Calmodulin	CALM2;CALM1	>tr|F8WBR5|F8WBR5_HUMAN Calmodulin OS=Homo sapiens GN=CALM2 PE=4 SV=1;>tr|G3V479|G3V479_HUMAN Calmodulin OS=Homo sapiens GN=CALM1 PE=4 SV=1;>tr|H0Y7A7|H0Y7A7_HUMAN Calmodulin (Fragment) OS=Homo sapiens GN=CALM2 PE=4 SV=1;>sp|P62158|CALM_HUMAN Calmodulin OS	4	2	2	2	1	1	2	2	1	2	2	1	0	1	1	1	1	1	2	2	1	2	2	1	0	1	1	1	1	1	2	2	1	2	2	1	0	1	1	1	46.2	46.2
F8WBT5;Q96BK5-2;E5RJG9;E5RGR1;B4DKV0;E5RIV0	F8WBT5;Q96BK5-2;E5RJG9;E5RGR1;B4DKV0	3;3;2;2;2;1	1;1;0;0;0;0	1;1;0;0;0;0	PIN2/TERF1-interacting telomerase inhibitor 1;Transcription factor SOX-7	PINX1;SOX7	>tr|F8WBT5|F8WBT5_HUMAN PIN2/TERF1-interacting telomerase inhibitor 1 OS=Homo sapiens GN=PINX1 PE=4 SV=1;>sp|Q96BK5-2|PINX1_HUMAN Isoform 2 of PIN2/TERF1-interacting telomerase inhibitor 1 OS=Homo sapiens GN=PINX1;>tr|E5RJG9|E5RJG9_HUMAN PIN2/TERF1-interac	6	3	1	1	2	1	3	1	3	2	2	2	1	1	2	2	0	0	1	0	1	0	0	0	0	0	0	0	0	0	1	0	1	0	0	0	0	0	0	0	31.4	14
F8WEF4;Q5JVF3-3;Q5JVF3;Q5JVF3-4;F8W955;Q5JVF3-2	F8WEF4;Q5JVF3-3;Q5JVF3;Q5JVF3-4;F8W955;Q5JVF3-2	4;4;4;4;3;3	4;4;4;4;3;3	4;4;4;4;3;3	PCI domain-containing protein 2	PCID2	>tr|F8WEF4|F8WEF4_HUMAN PCI domain-containing protein 2 OS=Homo sapiens GN=PCID2 PE=4 SV=1;>sp|Q5JVF3-3|PCID2_HUMAN Isoform 3 of PCI domain-containing protein 2 OS=Homo sapiens GN=PCID2;>sp|Q5JVF3|PCID2_HUMAN PCI domain-containing protein 2 OS=Homo sapiens	6	4	4	4	1	1	1	0	3	1	1	1	1	0	0	1	1	1	1	0	3	1	1	1	1	0	0	1	1	1	1	0	3	1	1	1	1	0	0	1	16	16
G3V0I6;Q01804;Q01804-3;D6RI06;Q7RTX8;Q01804-2	G3V0I6;Q01804;Q01804-3	22;22;20;7;4;2	22;22;20;7;4;2	22;22;20;7;4;2	OTU domain-containing protein 4	OTUD4	>tr|G3V0I6|G3V0I6_HUMAN OTU domain containing 4, isoform CRA_f OS=Homo sapiens GN=OTUD4 PE=4 SV=1;>sp|Q01804|OTUD4_HUMAN OTU domain-containing protein 4 OS=Homo sapiens GN=OTUD4 PE=1 SV=3;>sp|Q01804-3|OTUD4_HUMAN Isoform 3 of OTU domain-containing protein	6	22	22	22	15	11	16	12	11	12	16	14	8	9	8	11	15	11	16	12	11	12	16	14	8	9	8	11	15	11	16	12	11	12	16	14	8	9	8	11	24	24
G3V193;Q9C0C7-4;Q9C0C7-2;Q9C0C7-3;Q9C0C7;Q9C0C7-5;F8W9Z4;H0YE34	G3V193;Q9C0C7-4;Q9C0C7-2;Q9C0C7-3;Q9C0C7;Q9C0C7-5;F8W9Z4	7;7;7;7;7;7;5;1	7;7;7;7;7;7;5;1	7;7;7;7;7;7;5;1	Activating molecule in BECN1-regulated autophagy protein 1	AMBRA1	>tr|G3V193|G3V193_HUMAN Activating molecule in BECN1-regulated autophagy protein 1 OS=Homo sapiens GN=AMBRA1 PE=4 SV=1;>sp|Q9C0C7-4|AMRA1_HUMAN Isoform 4 of Activating molecule in BECN1-regulated autophagy protein 1 OS=Homo sapiens GN=AMBRA1;>sp|Q9C0C7-2|A	8	7	7	7	1	4	5	2	2	2	3	3	6	3	5	2	1	4	5	2	2	2	3	3	6	3	5	2	1	4	5	2	2	2	3	3	6	3	5	2	9.3	9.3
G3V1B2;Q96H72-2;Q96H72;E9PNE7;E9PNN7;E9PSA8;E9PRH4	G3V1B2;Q96H72-2;Q96H72;E9PNE7	8;8;8;7;3;2;2	8;8;8;7;3;2;2	8;8;8;7;3;2;2	Zinc transporter ZIP13	SLC39A13	>tr|G3V1B2|G3V1B2_HUMAN Solute carrier family 39 (Zinc transporter), member 13, isoform CRA_a OS=Homo sapiens GN=SLC39A13 PE=4 SV=1;>sp|Q96H72-2|S39AD_HUMAN Isoform 2 of Zinc transporter ZIP13 OS=Homo sapiens GN=SLC39A13;>sp|Q96H72|S39AD_HUMAN Zinc transpo	7	8	8	8	6	7	6	6	6	5	6	6	5	7	5	5	6	7	6	6	6	5	6	6	5	7	5	5	6	7	6	6	6	5	6	6	5	7	5	5	36	36
G3V1J3;O75027;O75027-2;B4DGL8;G3XAC4;E9PJR8	G3V1J3;O75027;O75027-2;B4DGL8;G3XAC4	10;10;10;9;9;2	10;10;10;9;9;2	10;10;10;9;9;2	ATP-binding cassette sub-family B member 7, mitochondrial	ABCB7	>tr|G3V1J3|G3V1J3_HUMAN ATP-binding cassette sub-family B member 7, mitochondrial OS=Homo sapiens GN=ABCB7 PE=3 SV=1;>sp|O75027|ABCB7_HUMAN ATP-binding cassette sub-family B member 7, mitochondrial OS=Homo sapiens GN=ABCB7 PE=1 SV=2;>sp|O75027-2|ABCB7_HUMA	6	10	10	10	5	4	5	4	8	6	6	8	4	4	6	4	5	4	5	4	8	6	6	8	4	4	6	4	5	4	5	4	8	6	6	8	4	4	6	4	19.3	19.3
G3V1K3;Q15165-3;Q15165-1;Q15165	G3V1K3;Q15165-3;Q15165-1;Q15165	3;2;2;2	3;2;2;2	3;2;2;2	Serum paraoxonase/arylesterase 2	PON2	>tr|G3V1K3|G3V1K3_HUMAN Paraoxonase 2, isoform CRA_a OS=Homo sapiens GN=PON2 PE=4 SV=1;>sp|Q15165-3|PON2_HUMAN Isoform 3 of Serum paraoxonase/arylesterase 2 OS=Homo sapiens GN=PON2;>sp|Q15165-1|PON2_HUMAN Isoform 1 of Serum paraoxonase/arylesterase 2 OS=Ho	4	3	3	3	0	0	0	0	1	1	0	3	0	0	1	0	0	0	0	0	1	1	0	3	0	0	1	0	0	0	0	0	1	1	0	3	0	0	1	0	9.9	9.9
O15226;G3V1N1	O15226;G3V1N1	37;37	37;37	37;37	NF-kappa-B-repressing factor	NKRF	>sp|O15226|NKRF_HUMAN NF-kappa-B-repressing factor OS=Homo sapiens GN=NKRF PE=1 SV=2;>tr|G3V1N1|G3V1N1_HUMAN NF-kappa-B-repressing factor OS=Homo sapiens GN=NKRF PE=4 SV=1	2	37	37	37	25	25	25	26	18	24	25	25	26	28	28	32	25	25	25	26	18	24	25	25	26	28	28	32	25	25	25	26	18	24	25	25	26	28	28	32	48.1	48.1
H0YIT6;G3V1N3;Q86XJ1	H0YIT6;G3V1N3;Q86XJ1	3;3;3	3;3;3	3;3;3	GAS2-like protein 3	GAS2L3	>tr|H0YIT6|H0YIT6_HUMAN GAS2-like protein 3 (Fragment) OS=Homo sapiens GN=GAS2L3 PE=4 SV=1;>tr|G3V1N3|G3V1N3_HUMAN GAS2-like protein 3 OS=Homo sapiens GN=GAS2L3 PE=4 SV=1;>sp|Q86XJ1|GA2L3_HUMAN GAS2-like protein 3 OS=Homo sapiens GN=GAS2L3 PE=1 SV=1	3	3	3	3	2	3	2	2	1	2	0	1	1	0	0	1	2	3	2	2	1	2	0	1	1	0	0	1	2	3	2	2	1	2	0	1	1	0	0	1	14.3	14.3
G3V203;Q07020;H0YHA7;F8VWC5;F8VYV2;E7EW92;F8VUA6;F8VXR6	G3V203;Q07020;H0YHA7;F8VWC5;F8VYV2;E7EW92;F8VUA6	8;8;7;7;6;6;4;1	8;8;7;7;6;6;4;1	8;8;7;7;6;6;4;1	60S ribosomal protein L18	RPL18	>tr|G3V203|G3V203_HUMAN 60S ribosomal protein L18 OS=Homo sapiens GN=RPL18 PE=3 SV=1;>sp|Q07020|RL18_HUMAN 60S ribosomal protein L18 OS=Homo sapiens GN=RPL18 PE=1 SV=2;>tr|H0YHA7|H0YHA7_HUMAN 60S ribosomal protein L18 (Fragment) OS=Homo sapiens GN=RPL18 PE	8	8	8	8	6	6	7	7	6	6	7	7	5	7	6	7	6	6	7	7	6	6	7	7	5	7	6	7	6	6	7	7	6	6	7	7	5	7	6	7	40.9	40.9
G3V279;P84090	G3V279;P84090	1;1	1;1	1;1	Enhancer of rudimentary homolog	ERH	>tr|G3V279|G3V279_HUMAN Enhancer of rudimentary homolog OS=Homo sapiens GN=ERH PE=4 SV=1;>sp|P84090|ERH_HUMAN Enhancer of rudimentary homolog OS=Homo sapiens GN=ERH PE=1 SV=1	2	1	1	1	1	1	1	1	1	1	1	1	1	1	1	1	1	1	1	1	1	1	1	1	1	1	1	1	1	1	1	1	1	1	1	1	1	1	1	1	15.5	15.5
G3V448;Q9H3N1	G3V448;Q9H3N1	1;1	1;1	1;1	Thioredoxin-related transmembrane protein 1	TMX1	>tr|G3V448|G3V448_HUMAN Thioredoxin-related transmembrane protein 1 OS=Homo sapiens GN=TMX1 PE=4 SV=1;>sp|Q9H3N1|TMX1_HUMAN Thioredoxin-related transmembrane protein 1 OS=Homo sapiens GN=TMX1 PE=1 SV=1	2	1	1	1	1	0	0	0	1	1	1	0	0	0	0	0	1	0	0	0	1	1	1	0	0	0	0	0	1	0	0	0	1	1	1	0	0	0	0	0	11.4	11.4
G3V4T7;Q96NE9-2;Q96NE9;H0YJC1;Q96NE9-3;G3V2L4	G3V4T7;Q96NE9-2;Q96NE9;H0YJC1;Q96NE9-3	3;3;3;2;2;1	3;3;3;2;2;1	3;3;3;2;2;1	FERM domain-containing protein 6	FRMD6	>tr|G3V4T7|G3V4T7_HUMAN FERM domain-containing protein 6 OS=Homo sapiens GN=FRMD6 PE=4 SV=1;>sp|Q96NE9-2|FRMD6_HUMAN Isoform 2 of FERM domain-containing protein 6 OS=Homo sapiens GN=FRMD6;>sp|Q96NE9|FRMD6_HUMAN FERM domain-containing protein 6 OS=Homo sapi	6	3	3	3	2	1	2	0	3	2	3	3	1	1	1	0	2	1	2	0	3	2	3	3	1	1	1	0	2	1	2	0	3	2	3	3	1	1	1	0	7.9	7.9
G3XA81;Q9BTX1-2;Q9BTX1;B4DZG6;Q9BTX1-4;A6NEN1;Q9BTX1-3	G3XA81;Q9BTX1-2;Q9BTX1;B4DZG6;Q9BTX1-4;A6NEN1;Q9BTX1-3	7;7;7;6;5;4;4	7;7;7;6;5;4;4	7;7;7;6;5;4;4	Nucleoporin NDC1	NDC1	>tr|G3XA81|G3XA81_HUMAN Nucleoporin NDC1 OS=Homo sapiens GN=TMEM48 PE=4 SV=1;>sp|Q9BTX1-2|NDC1_HUMAN Isoform 2 of Nucleoporin NDC1 OS=Homo sapiens GN=TMEM48;>sp|Q9BTX1|NDC1_HUMAN Nucleoporin NDC1 OS=Homo sapiens GN=TMEM48 PE=1 SV=2;>tr|B4DZG6|B4DZG6_HUMAN	7	7	7	7	6	7	6	6	5	6	7	5	6	4	6	4	6	7	6	6	5	6	7	5	6	4	6	4	6	7	6	6	5	6	7	5	6	4	6	4	19.1	19.1
G3XAA0	G3XAA0	22	22	1			>tr|G3XAA0|G3XAA0_HUMAN AT rich interactive domain 1B (SWI1-like), isoform CRA_a OS=Homo sapiens GN=ARID1B PE=4 SV=1	1	22	22	1	18	13	16	11	13	9	14	18	15	14	17	15	18	13	16	11	13	9	14	18	15	14	17	15	1	1	1	0	1	0	1	1	0	0	1	0	16.4	16.4
G3XAB3	G3XAB3	18	2	2		TTC17	>tr|G3XAB3|G3XAB3_HUMAN Tetratricopeptide repeat domain 17, isoform CRA_c OS=Homo sapiens GN=TTC17 PE=4 SV=1	1	18	2	2	16	14	13	10	10	13	12	14	9	14	13	15	1	2	1	1	0	1	1	1	1	1	1	1	1	2	1	1	0	1	1	1	1	1	1	1	25.6	3.5
Q6UN15-3;G3XAD6;Q6UN15;Q6UN15-4;H0Y8P7	Q6UN15-3;G3XAD6;Q6UN15;Q6UN15-4	13;13;13;9;4	13;13;13;9;4	13;13;13;9;4	Pre-mRNA 3-end-processing factor FIP1	FIP1L1	>sp|Q6UN15-3|FIP1_HUMAN Isoform 3 of Pre-mRNA 3-end-processing factor FIP1 OS=Homo sapiens GN=FIP1L1;>tr|G3XAD6|G3XAD6_HUMAN FIP1 like 1 (S. cerevisiae), isoform CRA_d OS=Homo sapiens GN=FIP1L1 PE=4 SV=1;>sp|Q6UN15|FIP1_HUMAN Pre-mRNA 3-end-processing fa	5	13	13	13	12	13	12	11	11	12	12	13	13	13	12	12	12	13	12	11	11	12	12	13	13	13	12	12	12	13	12	11	11	12	12	13	13	13	12	12	34	34
G3XAI6;P54803-5;P54803-4;P54803;G3V4M2;G3V5E8;G3V255;F5H642;E7EPA4;P54803-3	G3XAI6;P54803-5;P54803-4;P54803;G3V4M2;G3V5E8;G3V255;F5H642;E7EPA4;P54803-3	2;2;2;2;1;1;1;1;1;1	2;2;2;2;1;1;1;1;1;1	2;2;2;2;1;1;1;1;1;1	Galactocerebrosidase	GALC	>tr|G3XAI6|G3XAI6_HUMAN Galactosylceramidase, isoform CRA_a OS=Homo sapiens GN=GALC PE=4 SV=1;>sp|P54803-5|GALC_HUMAN Isoform 5 of Galactocerebrosidase OS=Homo sapiens GN=GALC;>sp|P54803-4|GALC_HUMAN Isoform 4 of Galactocerebrosidase OS=Homo sapiens GN=GAL	10	2	2	2	1	1	1	1	2	1	1	2	1	0	1	0	1	1	1	1	2	1	1	2	1	0	1	0	1	1	1	1	2	1	1	2	1	0	1	0	6.4	6.4
Q6JQN1;G3XAJ0;F8VXK4;F8VW35;F8VWG8;F8W1I9;Q6JQN1-3;Q6JQN1-2	Q6JQN1;G3XAJ0	3;3;1;1;1;1;1;1	3;3;1;1;1;1;1;1	3;3;1;1;1;1;1;1	Acyl-CoA dehydrogenase family member 10	ACAD10	>sp|Q6JQN1|ACD10_HUMAN Acyl-CoA dehydrogenase family member 10 OS=Homo sapiens GN=ACAD10 PE=2 SV=1;>tr|G3XAJ0|G3XAJ0_HUMAN Acyl-CoA dehydrogenase family member 10 OS=Homo sapiens GN=ACAD10 PE=3 SV=1	8	3	3	3	0	0	1	0	2	2	3	2	0	0	1	2	0	0	1	0	2	2	3	2	0	0	1	2	0	0	1	0	2	2	3	2	0	0	1	2	3.5	3.5
G5E927;I3L2Z5;F5H7A6;C6G496;P56270;I3L4Y2;I3L0M3;H3BQI4;I3L411;H3BPU3;H3BQS2;H3BQD6;Q9HBE1-4;Q9HBE1-2;Q9HBE1-3;Q9HBE1	G5E927;I3L2Z5;F5H7A6;C6G496;P56270	5;4;4;4;4;2;2;2;1;1;1;1;1;1;1;1	5;4;4;4;4;2;2;2;1;1;1;1;1;1;1;1	3;2;2;2;2;2;2;2;1;1;1;1;0;0;0;0	Myc-associated zinc finger protein	MAZ	>tr|G5E927|G5E927_HUMAN MYC-associated zinc finger protein (Purine-binding transcription factor), isoform CRA_d OS=Homo sapiens GN=MAZ PE=4 SV=1;>tr|I3L2Z5|I3L2Z5_HUMAN Myc-associated zinc finger protein (Fragment) OS=Homo sapiens GN=MAZ PE=4 SV=1;>tr|F5H7	16	5	5	3	2	4	4	3	3	5	4	3	4	3	1	2	2	4	4	3	3	5	4	3	4	3	1	2	1	2	3	2	2	3	3	2	2	1	1	1	8.9	8.9
G5E933;H7BXU8;O95248;O95248-4;C9JNC1;H0Y5W8	G5E933;H7BXU8;O95248;O95248-4;C9JNC1	4;4;4;4;3;1	4;4;4;4;3;1	4;4;4;4;3;1	Myotubularin-related protein 5	SBF1	>tr|G5E933|G5E933_HUMAN Myotubularin-related protein 5 OS=Homo sapiens GN=SBF1 PE=4 SV=1;>tr|H7BXU8|H7BXU8_HUMAN Myotubularin-related protein 5 OS=Homo sapiens GN=SBF1 PE=4 SV=1;>sp|O95248|MTMR5_HUMAN Myotubularin-related protein 5 OS=Homo sapiens GN=SBF1	6	4	4	4	1	0	2	2	2	1	2	1	2	1	2	2	1	0	2	2	2	1	2	1	2	1	2	2	1	0	2	2	2	1	2	1	2	1	2	2	2.8	2.8
G5E953;Q13615-3;Q13615-2;Q13615	G5E953;Q13615-3;Q13615-2;Q13615	2;2;2;2	2;2;2;2	2;2;2;2	Myotubularin-related protein 3	MTMR3	>tr|G5E953|G5E953_HUMAN Myotubularin related protein 3, isoform CRA_e OS=Homo sapiens GN=MTMR3 PE=4 SV=1;>sp|Q13615-3|MTMR3_HUMAN Isoform C of Myotubularin-related protein 3 OS=Homo sapiens GN=MTMR3;>sp|Q13615-2|MTMR3_HUMAN Isoform A of Myotubularin-relate	4	2	2	2	0	0	2	1	0	0	1	0	0	0	0	1	0	0	2	1	0	0	1	0	0	0	0	1	0	0	2	1	0	0	1	0	0	0	0	1	3.1	3.1
G5E962;P43364-2;P43364;C9J2X2	G5E962;P43364-2;P43364;C9J2X2	3;3;3;2	3;3;3;2	3;3;3;2	Melanoma-associated antigen 11	MAGEA11	>tr|G5E962|G5E962_HUMAN Melanoma antigen family A, 11, isoform CRA_a OS=Homo sapiens GN=MAGEA11 PE=4 SV=1;>sp|P43364-2|MAGAB_HUMAN Isoform 2 of Melanoma-associated antigen 11 OS=Homo sapiens GN=MAGEA11;>sp|P43364|MAGAB_HUMAN Melanoma-associated antigen 11	4	3	3	3	0	1	3	0	2	2	2	2	1	2	1	2	0	1	3	0	2	2	2	2	1	2	1	2	0	1	3	0	2	2	2	2	1	2	1	2	9	9
G5E9B2;P50990;B4DEM7;B4DQH4;H7C4C8;H7C2U0	G5E9B2;P50990;B4DEM7;B4DQH4	34;34;33;30;16;5	34;34;33;30;16;5	34;34;33;30;16;5	T-complex protein 1 subunit theta	CCT8	>tr|G5E9B2|G5E9B2_HUMAN Chaperonin containing TCP1, subunit 8 (Theta), isoform CRA_a OS=Homo sapiens GN=CCT8 PE=3 SV=1;>sp|P50990|TCPQ_HUMAN T-complex protein 1 subunit theta OS=Homo sapiens GN=CCT8 PE=1 SV=4;>tr|B4DEM7|B4DEM7_HUMAN T-complex protein 1 sub	6	34	34	34	27	29	30	28	29	26	25	29	26	27	26	26	27	29	30	28	29	26	25	29	26	27	26	26	27	29	30	28	29	26	25	29	26	27	26	26	63.1	63.1
G5E9C8;Q07889;F8W9I5;F5GX06;B4DXG2;B7ZKT6;Q07890;C9K0N6	G5E9C8;Q07889;F8W9I5;F5GX06	20;20;18;16;4;2;2;1	20;20;18;16;4;2;2;1	20;20;18;16;4;2;2;1	Son of sevenless homolog 1	SOS1	>tr|G5E9C8|G5E9C8_HUMAN Son of sevenless homolog 1 OS=Homo sapiens GN=SOS1 PE=4 SV=1;>sp|Q07889|SOS1_HUMAN Son of sevenless homolog 1 OS=Homo sapiens GN=SOS1 PE=1 SV=1;>tr|F8W9I5|F8W9I5_HUMAN Son of sevenless homolog 1 OS=Homo sapiens GN=SOS1 PE=4 SV=1;>tr	8	20	20	20	12	13	17	11	15	13	15	18	10	8	7	10	12	13	17	11	15	13	15	18	10	8	7	10	12	13	17	11	15	13	15	18	10	8	7	10	17.9	17.9
G5E9E2;Q5J9I4;P29372-2;P29372;A2IDA3	G5E9E2;Q5J9I4;P29372-2;P29372;A2IDA3	10;10;10;10;8	10;10;10;10;8	10;10;10;10;8	DNA-3-methyladenine glycosylase	MPG	>tr|G5E9E2|G5E9E2_HUMAN DNA-3-methyladenine glycosylase OS=Homo sapiens GN=MPG PE=3 SV=1;>tr|Q5J9I4|Q5J9I4_HUMAN DNA-3-methyladenine glycosylase OS=Homo sapiens GN=PIG16 PE=2 SV=1;>sp|P29372-2|3MG_HUMAN Isoform 2 of DNA-3-methyladenine glycosylase OS=Homo	5	10	10	10	4	6	4	4	10	10	10	9	7	6	5	5	4	6	4	4	10	10	10	9	7	6	5	5	4	6	4	4	10	10	10	9	7	6	5	5	50.5	50.5
G5E9E7;Q07157-2;G3V1L9;Q07157;H0Y3R8;H0YKB1;H0YLT6	G5E9E7;Q07157-2;G3V1L9;Q07157	13;13;12;12;3;2;1	13;13;12;12;3;2;1	13;13;12;12;3;2;1	Tight junction protein ZO-1	TJP1	>tr|G5E9E7|G5E9E7_HUMAN Tight junction protein 1 (Zona occludens 1), isoform CRA_e OS=Homo sapiens GN=TJP1 PE=4 SV=1;>sp|Q07157-2|ZO1_HUMAN Isoform Short of Tight junction protein ZO-1 OS=Homo sapiens GN=TJP1;>tr|G3V1L9|G3V1L9_HUMAN Tight junction protein	7	13	13	13	6	5	7	4	6	6	4	8	4	3	5	3	6	5	7	4	6	6	4	8	4	3	5	3	6	5	7	4	6	6	4	8	4	3	5	3	10.8	10.8
Q12906;G5E9M5;C9JFV5;Q12906-5;Q12906-4;Q12906-2;Q12906-6;Q12906-3;B4DFG4;Q96SI9-2;Q96SI9	Q12906;G5E9M5;C9JFV5;Q12906-5;Q12906-4;Q12906-2;Q12906-6;Q12906-3;B4DFG4	21;21;20;20;20;20;20;20;13;2;2	21;21;20;20;20;20;20;20;13;2;2	21;21;20;20;20;20;20;20;13;2;2	Interleukin enhancer-binding factor 3	ILF3	>sp|Q12906|ILF3_HUMAN Interleukin enhancer-binding factor 3 OS=Homo sapiens GN=ILF3 PE=1 SV=3;>tr|G5E9M5|G5E9M5_HUMAN Interleukin enhancer binding factor 3, 90kDa, isoform CRA_b OS=Homo sapiens GN=ILF3 PE=4 SV=1;>tr|C9JFV5|C9JFV5_HUMAN Interleukin enhancer	11	21	21	21	14	13	14	15	10	9	15	14	11	14	13	15	14	13	14	15	10	9	15	14	11	14	13	15	14	13	14	15	10	9	15	14	11	14	13	15	31.7	31.7
G5E9M6;Q9NX61	G5E9M6;Q9NX61	2;2	2;2	2;2	Transmembrane protein 161A	TMEM161A	>tr|G5E9M6|G5E9M6_HUMAN Putative uncharacterized protein FLJ20422 OS=Homo sapiens GN=TMEM161A PE=4 SV=1;>sp|Q9NX61|T161A_HUMAN Transmembrane protein 161A OS=Homo sapiens GN=TMEM161A PE=2 SV=1	2	2	2	2	1	0	2	2	2	1	1	1	1	1	1	2	1	0	2	2	2	1	1	1	1	1	1	2	1	0	2	2	2	1	1	1	1	1	1	2	6.6	6.6
G5E9W7;G5E9V5;P82650;H7C5F2;H7C5H3;Q9H3I1;H7C5L9;C9J5D8	G5E9W7;G5E9V5;P82650;H7C5F2;H7C5H3;Q9H3I1;H7C5L9	6;6;6;4;4;4;3;1	6;6;6;4;4;4;3;1	6;6;6;4;4;4;3;1	28S ribosomal protein S22, mitochondrial	MRPS22	>tr|G5E9W7|G5E9W7_HUMAN 28S ribosomal protein S22, mitochondrial OS=Homo sapiens GN=MRPS22 PE=4 SV=1;>tr|G5E9V5|G5E9V5_HUMAN 28S ribosomal protein S22, mitochondrial OS=Homo sapiens GN=MRPS22 PE=4 SV=1;>sp|P82650|RT22_HUMAN 28S ribosomal protein S22, mitoc	8	6	6	6	5	4	3	3	3	4	3	6	2	4	5	4	5	4	3	3	3	4	3	6	2	4	5	4	5	4	3	3	3	4	3	6	2	4	5	4	25.1	25.1
G5E9X0;Q96N46-2;Q96N46	G5E9X0;Q96N46-2;Q96N46	1;1;1	1;1;1	1;1;1	Tetratricopeptide repeat protein 14	TTC14	>tr|G5E9X0|G5E9X0_HUMAN Tetratricopeptide repeat domain 14, isoform CRA_b OS=Homo sapiens GN=TTC14 PE=4 SV=1;>sp|Q96N46-2|TTC14_HUMAN Isoform 2 of Tetratricopeptide repeat protein 14 OS=Homo sapiens GN=TTC14;>sp|Q96N46|TTC14_HUMAN Tetratricopeptide repeat	3	1	1	1	0	1	1	0	0	0	0	0	0	1	1	1	0	1	1	0	0	0	0	0	0	1	1	1	0	1	1	0	0	0	0	0	0	1	1	1	3.9	3.9
G5E9X3;Q9Y2H6-2;Q9Y2H6	G5E9X3;Q9Y2H6-2;Q9Y2H6	3;3;3	3;3;3	3;3;3	Fibronectin type-III domain-containing protein 3A	FNDC3A	>tr|G5E9X3|G5E9X3_HUMAN Fibronectin type III domain containing 3A, isoform CRA_f OS=Homo sapiens GN=FNDC3A PE=4 SV=1;>sp|Q9Y2H6-2|FND3A_HUMAN Isoform 2 of Fibronectin type-III domain-containing protein 3A OS=Homo sapiens GN=FNDC3A;>sp|Q9Y2H6|FND3A_HUMAN Fi	3	3	3	3	0	0	3	0	0	1	1	2	1	2	3	1	0	0	3	0	0	1	1	2	1	2	3	1	0	0	3	0	0	1	1	2	1	2	3	1	4.8	4.8
G8JL92;H0YLA6;H0YL38;Q6N043-3;Q6N043-2;Q6N043	G8JL92;H0YLA6;H0YL38;Q6N043-3;Q6N043-2;Q6N043	1;1;1;1;1;1	1;1;1;1;1;1	1;1;1;1;1;1	Zinc finger protein 280D	ZNF280D	>tr|G8JL92|G8JL92_HUMAN Zinc finger protein 280D OS=Homo sapiens GN=ZNF280D PE=4 SV=1;>tr|H0YLA6|H0YLA6_HUMAN Zinc finger protein 280D OS=Homo sapiens GN=ZNF280D PE=4 SV=1;>tr|H0YL38|H0YL38_HUMAN Zinc finger protein 280D OS=Homo sapiens GN=ZNF280D PE=4 SV=	6	1	1	1	0	0	0	1	0	1	1	1	0	0	0	0	0	0	0	1	0	1	1	1	0	0	0	0	0	0	0	1	0	1	1	1	0	0	0	0	4.3	4.3
G8JL95;Q9Y6X3	G8JL95;Q9Y6X3	10;10	10;10	8;8	MAU2 chromatid cohesion factor homolog	MAU2	>tr|G8JL95|G8JL95_HUMAN MAU2 chromatid cohesion factor homolog OS=Homo sapiens GN=MAU2 PE=4 SV=1;>sp|Q9Y6X3|SCC4_HUMAN MAU2 chromatid cohesion factor homolog OS=Homo sapiens GN=MAU2 PE=1 SV=2	2	10	10	8	6	6	7	7	8	5	8	7	4	6	7	8	6	6	7	7	8	5	8	7	4	6	7	8	4	4	5	5	6	3	6	5	2	4	5	6	23	23
G8JLI6;Q8IVL6;Q8IVL6-2;G3V1P9;E7ESD0	G8JLI6;Q8IVL6;Q8IVL6-2	17;17;12;5;1	17;17;12;5;1	17;17;12;5;1	Prolyl 3-hydroxylase 3	LEPREL2	>tr|G8JLI6|G8JLI6_HUMAN Prolyl 3-hydroxylase 3 OS=Homo sapiens GN=LEPREL2 PE=4 SV=1;>sp|Q8IVL6|P3H3_HUMAN Prolyl 3-hydroxylase 3 OS=Homo sapiens GN=LEPREL2 PE=2 SV=1;>sp|Q8IVL6-2|P3H3_HUMAN Isoform 2 of Prolyl 3-hydroxylase 3 OS=Homo sapiens GN=LEPREL2	5	17	17	17	11	12	11	8	14	12	13	12	9	10	8	9	11	12	11	8	14	12	13	12	9	10	8	9	11	12	11	8	14	12	13	12	9	10	8	9	27.5	27.5
G8JLM6;P49848;P49848-3;P49848-2;C9JFL8;C9JTY6;F8WEJ7;E5RKA5;C9J7C4;C9JIS2;E5RHA1;C9J088	G8JLM6;P49848;P49848-3;P49848-2	10;10;10;9;3;3;1;1;1;1;1;1	10;10;10;9;3;3;1;1;1;1;1;1	10;10;10;9;3;3;1;1;1;1;1;1	Transcription initiation factor TFIID subunit 6	TAF6	>tr|G8JLM6|G8JLM6_HUMAN Transcription initiation factor TFIID subunit 6 OS=Homo sapiens GN=TAF6 PE=4 SV=1;>sp|P49848|TAF6_HUMAN Transcription initiation factor TFIID subunit 6 OS=Homo sapiens GN=TAF6 PE=1 SV=1;>sp|P49848-3|TAF6_HUMAN Isoform 3 of Transcrip	12	10	10	10	5	5	3	3	8	9	7	7	6	6	4	8	5	5	3	3	8	9	7	7	6	6	4	8	5	5	3	3	8	9	7	7	6	6	4	8	19.3	19.3
H0Y2V6	H0Y2V6	55	1	1		CEP170	>tr|H0Y2V6|H0Y2V6_HUMAN Centrosomal protein of 170 kDa (Fragment) OS=Homo sapiens GN=CEP170 PE=4 SV=1	1	55	1	1	39	34	43	34	47	47	48	48	39	31	26	32	1	1	1	1	0	1	1	1	0	1	1	1	1	1	1	1	0	1	1	1	0	1	1	1	39.9	0.9
H0Y3K4	H0Y3K4	21	1	1		RBM33	>tr|H0Y3K4|H0Y3K4_HUMAN RNA-binding protein 33 (Fragment) OS=Homo sapiens GN=RBM33 PE=4 SV=1	1	21	1	1	19	14	19	17	20	17	19	19	20	15	15	14	1	1	1	1	1	1	1	1	1	1	0	1	1	1	1	1	1	1	1	1	1	1	0	1	30.9	2.3
H0Y3K7;O14639-3;O14639-5;O14639-4;H0Y7N6;F6XFR5	H0Y3K7;O14639-3;O14639-5;O14639-4	29;22;22;21;7;7	1;1;1;1;1;1	1;1;1;1;1;1	Actin-binding LIM protein 1	ABLIM1	>tr|H0Y3K7|H0Y3K7_HUMAN Actin-binding LIM protein 1 (Fragment) OS=Homo sapiens GN=ABLIM1 PE=4 SV=1;>sp|O14639-3|ABLM1_HUMAN Isoform 3 of Actin-binding LIM protein 1 OS=Homo sapiens GN=ABLIM1;>sp|O14639-5|ABLM1_HUMAN Isoform 5 of Actin-binding LIM protein 1	6	29	1	1	23	23	20	20	25	27	28	25	20	21	22	24	1	1	1	1	1	1	1	1	1	1	1	1	1	1	1	1	1	1	1	1	1	1	1	1	56.7	2.5
H0Y494;A1A5A8;Q9Y2K2-2;H7C038	H0Y494;A1A5A8	15;14;7;1	1;0;0;0	1;0;0;0	Serine/threonine-protein kinase SIK3	SIK3	>tr|H0Y494|H0Y494_HUMAN Serine/threonine-protein kinase SIK3 OS=Homo sapiens GN=SIK3 PE=4 SV=1;>tr|A1A5A8|A1A5A8_HUMAN KIAA0999 protein OS=Homo sapiens GN=KIAA0999 PE=2 SV=1	4	15	1	1	7	8	13	12	8	9	7	10	5	2	2	3	0	1	1	1	0	1	1	1	1	1	0	1	0	1	1	1	0	1	1	1	1	1	0	1	18.1	1.9
H0Y4E8;Q9Y2K2;Q9Y2K2-3;A1A5A9;H7C3X8	H0Y4E8;Q9Y2K2;Q9Y2K2-3;A1A5A9	18;17;16;14;5	18;17;16;14;5	4;4;4;2;2	Serine/threonine-protein kinase SIK3	SIK3;KIAA0999	>tr|H0Y4E8|H0Y4E8_HUMAN Serine/threonine-protein kinase SIK3 (Fragment) OS=Homo sapiens GN=SIK3 PE=4 SV=1;>sp|Q9Y2K2|SIK3_HUMAN Serine/threonine-protein kinase SIK3 OS=Homo sapiens GN=SIK3 PE=1 SV=3;>sp|Q9Y2K2-3|SIK3_HUMAN Isoform 3 of Serine/threonine-pro	5	18	18	4	8	8	13	14	10	9	7	11	4	1	2	3	8	8	13	14	10	9	7	11	4	1	2	3	1	1	1	3	2	1	1	2	0	0	0	1	21.3	21.3
H0Y4R1;P12268;F5H247;E7ETK5	H0Y4R1;P12268;F5H247	7;7;4;2	7;7;4;2	7;7;4;2	Inosine-5-monophosphate dehydrogenase 2	IMPDH2	>tr|H0Y4R1|H0Y4R1_HUMAN Inosine-5-monophosphate dehydrogenase 2 (Fragment) OS=Homo sapiens GN=IMPDH2 PE=3 SV=1;>sp|P12268|IMDH2_HUMAN Inosine-5-monophosphate dehydrogenase 2 OS=Homo sapiens GN=IMPDH2 PE=1 SV=2;>tr|F5H247|F5H247_HUMAN Inosine-5-monophosp	4	7	7	7	2	2	2	2	5	6	6	4	4	1	2	1	2	2	2	2	5	6	6	4	4	1	2	1	2	2	2	2	5	6	6	4	4	1	2	1	21.1	21.1
H0Y512;Q9HDC9-2;Q9HDC9	H0Y512;Q9HDC9-2;Q9HDC9	2;2;2	2;2;2	2;2;2	Adipocyte plasma membrane-associated protein	APMAP	>tr|H0Y512|H0Y512_HUMAN Protein C20orf3 (Fragment) OS=Homo sapiens GN=C20orf3 PE=4 SV=1;>sp|Q9HDC9-2|APMAP_HUMAN Isoform 2 of Adipocyte plasma membrane-associated protein OS=Homo sapiens GN=APMAP;>sp|Q9HDC9|APMAP_HUMAN Adipocyte plasma membrane-associated	3	2	2	2	0	0	1	0	2	1	2	1	0	0	0	0	0	0	1	0	2	1	2	1	0	0	0	0	0	0	1	0	2	1	2	1	0	0	0	0	6.4	6.4
H0Y564;Q9H1A4	H0Y564;Q9H1A4	1;1	1;1	1;1	Anaphase-promoting complex subunit 1	ANAPC1	>tr|H0Y564|H0Y564_HUMAN Anaphase-promoting complex subunit 1 (Fragment) OS=Homo sapiens GN=ANAPC1 PE=4 SV=1;>sp|Q9H1A4|APC1_HUMAN Anaphase-promoting complex subunit 1 OS=Homo sapiens GN=ANAPC1 PE=1 SV=1	2	1	1	1	1	0	1	0	1	1	1	1	1	1	1	0	1	0	1	0	1	1	1	1	1	1	1	0	1	0	1	0	1	1	1	1	1	1	1	0	1	1
H0Y6E7;H3BT71;P38159;P38159-2;Q96E39;H3BR27;B3KRG5;H3BUY5;P38159-3;O75526;H3BNC1;Q8N7X1	H0Y6E7;H3BT71;P38159;P38159-2;Q96E39	7;7;7;6;5;3;3;3;3;2;1;1	7;7;7;6;5;3;3;3;3;2;1;1	7;7;7;6;5;3;3;3;3;2;1;1	RNA-binding motif protein, X chromosome;RNA-binding motif protein, X chromosome, N-terminally processed;RNA binding motif protein, X-linked-like-1	RBMX;RBMXL1	>tr|H0Y6E7|H0Y6E7_HUMAN RNA-binding motif protein, X chromosome, N-terminally processed (Fragment) OS=Homo sapiens GN=RBMX PE=4 SV=2;>tr|H3BT71|H3BT71_HUMAN RNA-binding motif protein, X chromosome, N-terminally processed OS=Homo sapiens GN=RBMX PE=4 SV=1;>	12	7	7	7	3	4	6	3	3	3	4	4	5	2	3	4	3	4	6	3	3	3	4	4	5	2	3	4	3	4	6	3	3	3	4	4	5	2	3	4	30.1	30.1
H0Y6K5;H0Y7L6;Q02447-4;Q02447-3;Q02447-5;Q02447-6;Q02447-2;Q02447	H0Y6K5;H0Y7L6;Q02447-4;Q02447-3;Q02447-5;Q02447-6;Q02447-2;Q02447	1;1;1;1;1;1;1;1	1;1;1;1;1;1;1;1	1;1;1;1;1;1;1;1	Transcription factor Sp3	SP3	>tr|H0Y6K5|H0Y6K5_HUMAN Transcription factor Sp3 OS=Homo sapiens GN=SP3 PE=4 SV=1;>tr|H0Y7L6|H0Y7L6_HUMAN Transcription factor Sp3 (Fragment) OS=Homo sapiens GN=SP3 PE=4 SV=1;>sp|Q02447-4|SP3_HUMAN Isoform 4 of Transcription factor Sp3 OS=Homo sapiens GN=S	8	1	1	1	1	1	1	1	0	0	0	0	0	0	1	1	1	1	1	1	0	0	0	0	0	0	1	1	1	1	1	1	0	0	0	0	0	0	1	1	2.4	2.4
H0Y7L9;P33897	H0Y7L9;P33897	1;1	1;1	1;1	ATP-binding cassette sub-family D member 1	ABCD1	>tr|H0Y7L9|H0Y7L9_HUMAN ATP-binding cassette sub-family D member 1 (Fragment) OS=Homo sapiens GN=ABCD1 PE=4 SV=1;>sp|P33897|ABCD1_HUMAN ATP-binding cassette sub-family D member 1 OS=Homo sapiens GN=ABCD1 PE=1 SV=2	2	1	1	1	1	0	1	1	1	1	1	1	1	1	1	1	1	0	1	1	1	1	1	1	1	1	1	1	1	0	1	1	1	1	1	1	1	1	1	1	7.2	7.2
H0Y8F3	H0Y8F3	1	1	1		FNIP2	>tr|H0Y8F3|H0Y8F3_HUMAN Folliculin-interacting protein 2 (Fragment) OS=Homo sapiens GN=FNIP2 PE=4 SV=1	1	1	1	1	0	1	1	0	0	0	0	0	0	0	0	0	0	1	1	0	0	0	0	0	0	0	0	0	0	1	1	0	0	0	0	0	0	0	0	0	4.1	4.1
H0Y8Q2;O75165	H0Y8Q2;O75165	1;1	1;1	1;1	DnaJ homolog subfamily C member 13	DNAJC13	>tr|H0Y8Q2|H0Y8Q2_HUMAN DnaJ homolog subfamily C member 13 (Fragment) OS=Homo sapiens GN=DNAJC13 PE=4 SV=1;>sp|O75165|DJC13_HUMAN DnaJ homolog subfamily C member 13 OS=Homo sapiens GN=DNAJC13 PE=1 SV=5	2	1	1	1	1	1	0	0	1	0	1	1	1	0	1	1	1	1	0	0	1	0	1	1	1	0	1	1	1	1	0	0	1	0	1	1	1	0	1	1	5.2	5.2
H0Y9R0;Q9BU23-2;Q9BU23;Q9BU23-3	H0Y9R0;Q9BU23-2;Q9BU23;Q9BU23-3	3;3;3;2	3;3;3;2	3;3;3;2	Lipase maturation factor 2	LMF2	>tr|H0Y9R0|H0Y9R0_HUMAN Lipase maturation factor 2 (Fragment) OS=Homo sapiens GN=LMF2 PE=4 SV=1;>sp|Q9BU23-2|LMF2_HUMAN Isoform 2 of Lipase maturation factor 2 OS=Homo sapiens GN=LMF2;>sp|Q9BU23|LMF2_HUMAN Lipase maturation factor 2 OS=Homo sapiens GN=LMF2	4	3	3	3	3	1	2	1	1	1	1	1	1	1	2	2	3	1	2	1	1	1	1	1	1	1	2	2	3	1	2	1	1	1	1	1	1	1	2	2	6.2	6.2
H0Y9X1;Q96EY4;D6RA57;D6RE67;D6RC31	H0Y9X1;Q96EY4;D6RA57	10;10;6;3;3	10;10;6;3;3	10;10;6;3;3	Translation machinery-associated protein 16	TMA16	>tr|H0Y9X1|H0Y9X1_HUMAN Translation machinery-associated protein 16 (Fragment) OS=Homo sapiens GN=TMA16 PE=4 SV=1;>sp|Q96EY4|TMA16_HUMAN Translation machinery-associated protein 16 OS=Homo sapiens GN=TMA16 PE=1 SV=2;>tr|D6RA57|D6RA57_HUMAN Translation mach	5	10	10	10	8	9	9	8	6	8	8	8	7	9	9	7	8	9	9	8	6	8	8	8	7	9	9	7	8	9	9	8	6	8	8	8	7	9	9	7	31.4	31.4
H0YAN8;O15013-7;O15013-4;O15013-5;O15013-6;O15013	H0YAN8;O15013-7;O15013-4;O15013-5;O15013-6;O15013	2;2;2;2;2;2	2;2;2;2;2;2	2;2;2;2;2;2	Rho guanine nucleotide exchange factor 10	ARHGEF10	>tr|H0YAN8|H0YAN8_HUMAN Rho guanine nucleotide exchange factor 10 (Fragment) OS=Homo sapiens GN=ARHGEF10 PE=4 SV=1;>sp|O15013-7|ARHGA_HUMAN Isoform 3 of Rho guanine nucleotide exchange factor 10 OS=Homo sapiens GN=ARHGEF10;>sp|O15013-4|ARHGA_HUMAN Isoform	6	2	2	2	1	2	1	1	1	0	1	0	0	0	0	1	1	2	1	1	1	0	1	0	0	0	0	1	1	2	1	1	1	0	1	0	0	0	0	1	3.4	3.4
H0YAS9;Q15006	H0YAS9;Q15006	1;1	1;1	1;1	ER membrane protein complex subunit 2	EMC2	>tr|H0YAS9|H0YAS9_HUMAN Protein EMC2 (Fragment) OS=Homo sapiens GN=EMC2 PE=4 SV=1;>sp|Q15006|EMC2_HUMAN ER membrane protein complex subunit 2 OS=Homo sapiens GN=EMC2 PE=1 SV=1	2	1	1	1	1	1	0	0	1	1	1	0	1	1	1	0	1	1	0	0	1	1	1	0	1	1	1	0	1	1	0	0	1	1	1	0	1	1	1	0	8.9	8.9
H0YBT4;Q14195;Q14195-2;E9PD68;Q14194;Q14194-2;F5GWI3;Q14117	H0YBT4;Q14195;Q14195-2;E9PD68;Q14194;Q14194-2	3;3;3;2;2;2;1;1	3;3;3;2;2;2;1;1	3;3;3;2;2;2;1;1	Dihydropyrimidinase-related protein 3;Dihydropyrimidinase-related protein 1	DPYSL3;CRMP1	>tr|H0YBT4|H0YBT4_HUMAN Dihydropyrimidinase-related protein 3 (Fragment) OS=Homo sapiens GN=DPYSL3 PE=4 SV=1;>sp|Q14195|DPYL3_HUMAN Dihydropyrimidinase-related protein 3 OS=Homo sapiens GN=DPYSL3 PE=1 SV=1;>sp|Q14195-2|DPYL3_HUMAN Isoform LCRMP-4 of Dihydr	8	3	3	3	3	3	2	2	2	3	3	3	2	2	3	3	3	3	2	2	2	3	3	3	2	2	3	3	3	3	2	2	2	3	3	3	2	2	3	3	21.5	21.5
H0YC63;Q9ULD2-5;Q9ULD2-2;Q9ULD2	H0YC63;Q9ULD2-5;Q9ULD2-2;Q9ULD2	3;3;3;3	3;3;3;3	3;3;3;3	Microtubule-associated tumor suppressor 1	MTUS1	>tr|H0YC63|H0YC63_HUMAN Microtubule-associated tumor suppressor 1 (Fragment) OS=Homo sapiens GN=MTUS1 PE=4 SV=1;>sp|Q9ULD2-5|MTUS1_HUMAN Isoform 5 of Microtubule-associated tumor suppressor 1 OS=Homo sapiens GN=MTUS1;>sp|Q9ULD2-2|MTUS1_HUMAN Isoform 2 of M	4	3	3	3	2	3	3	2	3	3	3	2	2	0	1	3	2	3	3	2	3	3	3	2	2	0	1	3	2	3	3	2	3	3	3	2	2	0	1	3	8.7	8.7
H0YCG1	H0YCG1	23	1	0		SF3B2	>tr|H0YCG1|H0YCG1_HUMAN Splicing factor 3B subunit 2 (Fragment) OS=Homo sapiens GN=SF3B2 PE=4 SV=1	1	23	1	0	23	22	19	19	19	22	19	20	21	20	20	21	1	1	0	0	0	1	1	0	1	1	1	1	0	0	0	0	0	0	0	0	0	0	0	0	66.1	6.2
H0YCH8;Q9NQ31-3;Q9NQ31-2;Q9NQ31	H0YCH8;Q9NQ31-3;Q9NQ31-2;Q9NQ31	1;1;1;1	1;1;1;1	1;1;1;1	A-kinase-interacting protein 1	AKIP1	>tr|H0YCH8|H0YCH8_HUMAN A-kinase-interacting protein 1 (Fragment) OS=Homo sapiens GN=AKIP1 PE=4 SV=1;>sp|Q9NQ31-3|AKIP1_HUMAN Isoform 3 of A-kinase-interacting protein 1 OS=Homo sapiens GN=AKIP1;>sp|Q9NQ31-2|AKIP1_HUMAN Isoform 2 of A-kinase-interacting pr	4	1	1	1	0	0	0	0	0	0	1	1	1	0	1	0	0	0	0	0	0	0	1	1	1	0	1	0	0	0	0	0	0	0	1	1	1	0	1	0	14.6	14.6
H0YD75;Q9UBE8	H0YD75;Q9UBE8	4;4	4;4	4;4	Mitogen-activated protein kinase;Serine/threonine-protein kinase NLK	NLK	>tr|H0YD75|H0YD75_HUMAN Serine/threonine-protein kinase NLK (Fragment) OS=Homo sapiens GN=NLK PE=4 SV=1;>sp|Q9UBE8|NLK_HUMAN Serine/threonine-protein kinase NLK OS=Homo sapiens GN=NLK PE=1 SV=2	2	4	4	4	4	2	4	3	4	1	3	4	4	0	2	4	4	2	4	3	4	1	3	4	4	0	2	4	4	2	4	3	4	1	3	4	4	0	2	4	9.9	9.9
H0YDT8;Q9NPA0	H0YDT8;Q9NPA0	2;2	2;2	2;2	ER membrane protein complex subunit 7	EMC7	>tr|H0YDT8|H0YDT8_HUMAN UPF0480 protein C15orf24 (Fragment) OS=Homo sapiens GN=C15orf24 PE=4 SV=1;>sp|Q9NPA0|EMC7_HUMAN ER membrane protein complex subunit 7 OS=Homo sapiens GN=EMC7 PE=1 SV=1	2	2	2	2	1	2	0	0	2	2	2	1	2	2	2	2	1	2	0	0	2	2	2	1	2	2	2	2	1	2	0	0	2	2	2	1	2	2	2	2	15.1	15.1
H0YEB6;O60232;G3V1B8;E9PK41;H0YEK1	H0YEB6;O60232;G3V1B8	3;3;2;1;1	3;3;2;1;1	3;3;2;1;1	Sjoegren syndrome/scleroderma autoantigen 1	SSSCA1	>tr|H0YEB6|H0YEB6_HUMAN Sjoegren syndrome/scleroderma autoantigen 1 (Fragment) OS=Homo sapiens GN=SSSCA1 PE=4 SV=1;>sp|O60232|SSA27_HUMAN Sjoegren syndrome/scleroderma autoantigen 1 OS=Homo sapiens GN=SSSCA1 PE=1 SV=1;>tr|G3V1B8|G3V1B8_HUMAN Sjoegren syndr	5	3	3	3	2	2	3	2	2	1	2	2	2	1	2	2	2	2	3	2	2	1	2	2	2	1	2	2	2	2	3	2	2	1	2	2	2	1	2	2	22.8	22.8
H0YEN5;P15880;E9PQD7;E9PMM9;I3L404;E9PPT0;E9PM36;H3BNG3;H0YE27	H0YEN5;P15880;E9PQD7;E9PMM9	9;9;6;5;4;4;4;1;1	9;9;6;5;4;4;4;1;1	9;9;6;5;4;4;4;1;1	40S ribosomal protein S2	RPS2	>tr|H0YEN5|H0YEN5_HUMAN 40S ribosomal protein S2 (Fragment) OS=Homo sapiens GN=RPS2 PE=3 SV=1;>sp|P15880|RS2_HUMAN 40S ribosomal protein S2 OS=Homo sapiens GN=RPS2 PE=1 SV=2;>tr|E9PQD7|E9PQD7_HUMAN 40S ribosomal protein S2 OS=Homo sapiens GN=RPS2 PE=4 SV=1	9	9	9	9	7	8	8	7	9	8	7	8	8	7	6	7	7	8	8	7	9	8	7	8	8	7	6	7	7	8	8	7	9	8	7	8	8	7	6	7	46.7	46.7
H0YEX2	H0YEX2	13	4	4		TAF2	>tr|H0YEX2|H0YEX2_HUMAN Transcription initiation factor TFIID subunit 2 (Fragment) OS=Homo sapiens GN=TAF2 PE=4 SV=1	1	13	4	4	10	9	12	9	11	7	10	9	10	8	8	9	2	2	3	2	3	1	2	1	2	2	3	2	2	2	3	2	3	1	2	1	2	2	3	2	49.3	17.6
H0YG33;P08107;F8VZJ4;F5H1D3;F5GZ62;E7EP94;Q5SP16;E7EP11	H0YG33;P08107;F8VZJ4;F5H1D3;F5GZ62;E7EP94;Q5SP16	49;46;41;41;41;36;32;12	49;46;41;41;41;36;32;12	32;29;24;24;24;22;20;7	Heat shock 70 kDa protein 1A/1B	HSPA1A	>tr|H0YG33|H0YG33_HUMAN Heat shock 70 kDa protein 1A/1B OS=Homo sapiens GN=HSPA1B PE=3 SV=1;>sp|P08107|HSP71_HUMAN Heat shock 70 kDa protein 1A/1B OS=Homo sapiens GN=HSPA1A PE=1 SV=5;>tr|F8VZJ4|F8VZJ4_HUMAN Heat shock 70 kDa protein 1A/1B OS=Homo sapiens G	8	49	49	32	42	45	40	39	36	36	37	37	43	42	40	40	42	45	40	39	36	36	37	37	43	42	40	40	28	30	26	25	24	22	23	23	26	28	27	26	69.9	69.9
H0YGA0	H0YGA0	8	2	0			>tr|H0YGA0|H0YGA0_HUMAN Fatty acid desaturase 1 OS=Homo sapiens GN=FADS1 PE=4 SV=1	1	8	2	0	5	4	5	2	3	3	4	6	3	5	3	3	1	1	2	1	1	1	1	2	1	2	1	1	0	0	0	0	0	0	0	0	0	0	0	0	26.3	10.6
H0YGC0;P52756;Q59HE6;C9JFQ5;H0YFW8;P52756-4;P52756-2;P52756-5;C9J9P7	H0YGC0;P52756;Q59HE6	18;18;13;2;2;2;2;2;1	17;17;12;2;2;2;2;2;1	17;17;12;2;2;2;2;2;1	RNA-binding protein 5	RBM5	>tr|H0YGC0|H0YGC0_HUMAN RNA-binding protein 5 OS=Homo sapiens GN=RBM5 PE=4 SV=1;>sp|P52756|RBM5_HUMAN RNA-binding protein 5 OS=Homo sapiens GN=RBM5 PE=1 SV=2;>tr|Q59HE6|Q59HE6_HUMAN RNA binding motif protein 5 variant (Fragment) OS=Homo sapiens GN=RBM5 PE=	9	18	17	17	11	15	10	9	5	10	9	8	13	13	17	14	11	14	10	8	5	10	9	8	13	13	16	13	11	14	10	8	5	10	9	8	13	13	16	13	22	20.8
H0YGH4;P01023;P20742-2;P20742;CON__ENSEMBL:ENSBTAP00000024146;H0YFH1;F8W7L3;H0YGH6	H0YGH4;P01023	25;25;4;4;3;1;1;1	25;25;4;4;3;1;1;1	25;25;4;4;3;1;1;1	Alpha-2-macroglobulin	A2M	>tr|H0YGH4|H0YGH4_HUMAN Alpha-2-macroglobulin OS=Homo sapiens GN=A2M PE=4 SV=1;>sp|P01023|A2MG_HUMAN Alpha-2-macroglobulin OS=Homo sapiens GN=A2M PE=1 SV=3	8	25	25	25	18	18	18	12	18	20	22	16	5	7	7	8	18	18	18	12	18	20	22	16	5	7	7	8	18	18	18	12	18	20	22	16	5	7	7	8	23	23
H0YNG3;H0YK72;P67812;H0YK83;H0YNX5;H0YKT4;H0YNA5;B4DUL4	H0YNG3;H0YK72;P67812;H0YK83;H0YNX5;H0YKT4;H0YNA5;B4DUL4	2;2;2;2;1;1;1;1	2;2;2;2;1;1;1;1	2;2;2;2;1;1;1;1	Signal peptidase complex catalytic subunit SEC11A	SEC11A	>tr|H0YNG3|H0YNG3_HUMAN Signal peptidase complex catalytic subunit SEC11A OS=Homo sapiens GN=SEC11A PE=4 SV=1;>tr|H0YK72|H0YK72_HUMAN SEC11-like 1 (S. cerevisiae), isoform CRA_a OS=Homo sapiens GN=SEC11A PE=4 SV=1;>sp|P67812|SC11A_HUMAN Signal peptidase co	8	2	2	2	0	1	1	1	1	1	1	0	2	1	0	1	0	1	1	1	1	1	1	0	2	1	0	1	0	1	1	1	1	1	1	0	2	1	0	1	12.3	12.3
H0YMI6;H0YMA1;H0YMZ1;H0YL69;P25789;H0YLS6;H0YLC2;H0YKT8;H0YN18;H0YKS0;P25789-2	H0YMI6;H0YMA1;H0YMZ1;H0YL69;P25789;H0YLS6;H0YLC2;H0YKT8;H0YN18	3;3;3;3;3;2;2;2;2;1;1	3;3;3;3;3;2;2;2;2;1;1	3;3;3;3;3;2;2;2;2;1;1	Proteasome subunit alpha type;Proteasome subunit alpha type-4;Proteasome subunit beta type	PSMA4	>tr|H0YMI6|H0YMI6_HUMAN Proteasome subunit alpha type (Fragment) OS=Homo sapiens GN=PSMA4 PE=3 SV=1;>tr|H0YMA1|H0YMA1_HUMAN Proteasome subunit alpha type (Fragment) OS=Homo sapiens GN=PSMA4 PE=3 SV=1;>tr|H0YMZ1|H0YMZ1_HUMAN Proteasome subunit alpha type (F	11	3	3	3	2	3	0	1	1	0	1	1	2	1	2	0	2	3	0	1	1	0	1	1	2	1	2	0	2	3	0	1	1	0	1	1	2	1	2	0	14.8	14.8
H0YL70;Q04726;H0YKN8;Q04726-2;H0YNT2;B4E2W3;H3BUH5	H0YL70;Q04726;H0YKN8;Q04726-2;H0YNT2;B4E2W3	28;27;26;26;22;15;3	28;27;26;26;22;15;3	0;0;0;0;0;0;0	Transducin-like enhancer protein 3	LITAF;TLE3	>tr|H0YL70|H0YL70_HUMAN Transducin-like enhancer protein 3 OS=Homo sapiens GN=TLE3 PE=4 SV=1;>sp|Q04726|TLE3_HUMAN Transducin-like enhancer protein 3 OS=Homo sapiens GN=TLE3 PE=1 SV=2;>tr|H0YKN8|H0YKN8_HUMAN Transducin-like enhancer protein 3 OS=Homo sapie	7	28	28	0	17	14	22	17	19	18	20	18	24	15	13	15	17	14	22	17	19	18	20	18	24	15	13	15	0	0	0	0	0	0	0	0	0	0	0	0	49.6	49.6
H0YLA2;P37108	H0YLA2;P37108	1;1	1;1	1;1	Signal recognition particle 14 kDa protein	SRP14	>tr|H0YLA2|H0YLA2_HUMAN Signal recognition particle 14 kDa protein OS=Homo sapiens GN=SRP14 PE=4 SV=1;>sp|P37108|SRP14_HUMAN Signal recognition particle 14 kDa protein OS=Homo sapiens GN=SRP14 PE=1 SV=2	2	1	1	1	1	1	1	1	1	1	1	1	1	0	1	1	1	1	1	1	1	1	1	1	1	0	1	1	1	1	1	1	1	1	1	1	1	0	1	1	12.2	12.2
H0YLE8;P46940	H0YLE8;P46940	2;2	2;2	2;2	Ras GTPase-activating-like protein IQGAP1	IQGAP1	>tr|H0YLE8|H0YLE8_HUMAN Ras GTPase-activating-like protein IQGAP1 OS=Homo sapiens GN=IQGAP1 PE=4 SV=1;>sp|P46940|IQGA1_HUMAN Ras GTPase-activating-like protein IQGAP1 OS=Homo sapiens GN=IQGAP1 PE=1 SV=1	2	2	2	2	0	1	1	1	0	0	2	1	0	0	0	1	0	1	1	1	0	0	2	1	0	0	0	1	0	1	1	1	0	0	2	1	0	0	0	1	2.6	2.6
H0YMF9;H0YN81;Q9GZS3;H0YL19	H0YMF9;H0YN81;Q9GZS3;H0YL19	2;2;2;1	2;2;2;1	2;2;2;1	WD repeat-containing protein 61;WD repeat-containing protein 61, N-terminally processed	WDR61	>tr|H0YMF9|H0YMF9_HUMAN WD repeat-containing protein 61 OS=Homo sapiens GN=WDR61 PE=4 SV=1;>tr|H0YN81|H0YN81_HUMAN WD repeat-containing protein 61 (Fragment) OS=Homo sapiens GN=WDR61 PE=4 SV=1;>sp|Q9GZS3|WDR61_HUMAN WD repeat-containing protein 61 OS=Homo	4	2	2	2	1	2	1	1	1	0	0	2	2	1	2	2	1	2	1	1	1	0	0	2	2	1	2	2	1	2	1	1	1	0	0	2	2	1	2	2	21.2	21.2
H0YMV8;Q71UM5;C9JLI6	H0YMV8;Q71UM5;C9JLI6	7;7;5	3;3;3	3;3;3	40S ribosomal protein S27;40S ribosomal protein S27-like	RPS27L	>tr|H0YMV8|H0YMV8_HUMAN 40S ribosomal protein S27 OS=Homo sapiens GN=RPS27L PE=3 SV=1;>sp|Q71UM5|RS27L_HUMAN 40S ribosomal protein S27-like OS=Homo sapiens GN=RPS27L PE=1 SV=3;>tr|C9JLI6|C9JLI6_HUMAN 40S ribosomal protein S27 OS=Homo sapiens GN=RPS27L PE=3	3	7	3	3	5	6	5	5	6	7	6	6	5	6	5	4	2	2	2	2	2	3	2	2	2	2	2	2	2	2	2	2	2	3	2	2	2	2	2	2	36	13
Q6ZNA4-2;Q6ZNA4;H0YN55;Q6ZNA4-3;H0YKS2;H0YKK5;H0YLK9	Q6ZNA4-2;Q6ZNA4;H0YN55;Q6ZNA4-3	9;9;9;9;3;2;2	9;9;9;9;3;2;2	9;9;9;9;3;2;2	E3 ubiquitin-protein ligase Arkadia	RNF111	>sp|Q6ZNA4-2|RN111_HUMAN Isoform 2 of E3 ubiquitin-protein ligase Arkadia OS=Homo sapiens GN=RNF111;>sp|Q6ZNA4|RN111_HUMAN E3 ubiquitin-protein ligase Arkadia OS=Homo sapiens GN=RNF111 PE=1 SV=3;>tr|H0YN55|H0YN55_HUMAN E3 ubiquitin-protein ligase Arkadia O	7	9	9	9	7	4	6	5	7	5	6	3	5	2	2	3	7	4	6	5	7	5	6	3	5	2	2	3	7	4	6	5	7	5	6	3	5	2	2	3	12.3	12.3
H3BLZ8;Q59F66;Q92841-1;Q92841-3;Q92841;C9JMU5;Q92841-2	H3BLZ8;Q59F66;Q92841-1;Q92841-3;Q92841;C9JMU5;Q92841-2	22;22;22;22;22;21;21	13;13;13;13;13;13;13	13;13;13;13;13;13;13	Probable ATP-dependent RNA helicase DDX17	DDX17	>tr|H3BLZ8|H3BLZ8_HUMAN Probable ATP-dependent RNA helicase DDX17 OS=Homo sapiens GN=DDX17 PE=3 SV=1;>tr|Q59F66|Q59F66_HUMAN DEAD box polypeptide 17 isoform p82 variant (Fragment) OS=Homo sapiens GN=DDX17 PE=2 SV=1;>sp|Q92841-1|DDX17_HUMAN Isoform 2 of Pro	7	22	13	13	14	13	15	18	18	14	18	16	14	12	9	15	7	7	8	12	9	6	9	8	6	7	3	8	7	7	8	12	9	6	9	8	6	7	3	8	33.2	21.5
H3BV80;H3BMM9;H3BTC0;Q15287;Q15287-3;Q15287-2;H3BR57;H3BPG5;H3BMS0;H3BRK4;H3BTV0;H3BNI3;H3BP82;H3BTR6;H3BUG0;H3BTY0;H3BNU7;H3BUL0	H3BV80;H3BMM9;H3BTC0;Q15287;Q15287-3;Q15287-2;H3BR57;H3BPG5;H3BMS0	7;7;7;7;6;6;4;4;4;1;1;1;1;1;1;1;1;1	7;7;7;7;6;6;4;4;4;1;1;1;1;1;1;1;1;1	7;7;7;7;6;6;4;4;4;1;1;1;1;1;1;1;1;1	RNA-binding protein with serine-rich domain 1	RNPS1	>tr|H3BV80|H3BV80_HUMAN RNA-binding protein with serine-rich domain 1 OS=Homo sapiens GN=RNPS1 PE=4 SV=1;>tr|H3BMM9|H3BMM9_HUMAN RNA-binding protein with serine-rich domain 1 (Fragment) OS=Homo sapiens GN=RNPS1 PE=4 SV=1;>tr|H3BTC0|H3BTC0_HUMAN RNA-binding	18	7	7	7	4	5	7	3	7	7	7	7	6	5	5	7	4	5	7	3	7	7	7	7	6	5	5	7	4	5	7	3	7	7	7	7	6	5	5	7	38.9	38.9
H3BNU8;Q1ED39	H3BNU8;Q1ED39	2;2	2;2	2;2	Lysine-rich nucleolar protein 1	KNOP1	>tr|H3BNU8|H3BNU8_HUMAN Protein C16orf88 OS=Homo sapiens GN=C16orf88 PE=4 SV=1;>sp|Q1ED39|CP088_HUMAN Protein C16orf88 OS=Homo sapiens GN=C16orf88 PE=1 SV=1	2	2	2	2	0	0	1	0	1	0	0	0	0	1	0	1	0	0	1	0	1	0	0	0	0	1	0	1	0	0	1	0	1	0	0	0	0	1	0	1	16.8	16.8
H3BP11;O75444;O75444-1	H3BP11;O75444;O75444-1	1;1;1	1;1;1	1;1;1	Transcription factor Maf	MAF	>tr|H3BP11|H3BP11_HUMAN Transcription factor Maf OS=Homo sapiens GN=MAF PE=4 SV=1;>sp|O75444|MAF_HUMAN Transcription factor Maf OS=Homo sapiens GN=MAF PE=1 SV=2;>sp|O75444-1|MAF_HUMAN Isoform 1 of Transcription factor Maf OS=Homo sapiens GN=MAF	3	1	1	1	1	0	1	0	0	0	0	0	0	0	0	0	1	0	1	0	0	0	0	0	0	0	0	0	1	0	1	0	0	0	0	0	0	0	0	0	4.7	4.7
H3BPJ9;O96000;H3BV16;Q96II6	H3BPJ9;O96000;H3BV16;Q96II6	2;2;1;1	2;2;1;1	2;2;1;1	NADH dehydrogenase [ubiquinone] 1 beta subcomplex subunit 10	NDUFB10	>tr|H3BPJ9|H3BPJ9_HUMAN NADH dehydrogenase [ubiquinone] 1 beta subcomplex subunit 10 OS=Homo sapiens GN=NDUFB10 PE=4 SV=1;>sp|O96000|NDUBA_HUMAN NADH dehydrogenase [ubiquinone] 1 beta subcomplex subunit 10 OS=Homo sapiens GN=NDUFB10 PE=1 SV=3;>tr|H3BV16|H3	4	2	2	2	1	0	0	0	0	0	1	0	0	0	2	0	1	0	0	0	0	0	1	0	0	0	2	0	1	0	0	0	0	0	1	0	0	0	2	0	15.5	15.5
H3BPK3;H3BPQ4;Q16775-2;Q16775;H3BQW8	H3BPK3;H3BPQ4;Q16775-2;Q16775;H3BQW8	2;2;2;2;1	2;2;2;2;1	2;2;2;2;1	Hydroxyacylglutathione hydrolase, mitochondrial	HAGH	>tr|H3BPK3|H3BPK3_HUMAN Hydroxyacylglutathione hydrolase, mitochondrial (Fragment) OS=Homo sapiens GN=HAGH PE=3 SV=1;>tr|H3BPQ4|H3BPQ4_HUMAN Hydroxyacylglutathione hydrolase, mitochondrial OS=Homo sapiens GN=HAGH PE=3 SV=1;>sp|Q16775-2|GLO2_HUMAN Isoform 2	5	2	2	2	0	0	0	0	0	0	1	0	0	0	1	0	0	0	0	0	0	0	1	0	0	0	1	0	0	0	0	0	0	0	1	0	0	0	1	0	9.6	9.6
H3BPU4;Q9UGJ1-2;Q9UGJ1	H3BPU4;Q9UGJ1-2;Q9UGJ1	4;4;4	4;4;4	4;4;4	Gamma-tubulin complex component 4	TUBGCP4	>tr|H3BPU4|H3BPU4_HUMAN Gamma-tubulin complex component 4 (Fragment) OS=Homo sapiens GN=TUBGCP4 PE=4 SV=1;>sp|Q9UGJ1-2|GCP4_HUMAN Isoform 2 of Gamma-tubulin complex component 4 OS=Homo sapiens GN=TUBGCP4;>sp|Q9UGJ1|GCP4_HUMAN Gamma-tubulin complex componen	3	4	4	4	2	3	3	1	1	1	1	3	3	1	3	1	2	3	3	1	1	1	1	3	3	1	3	1	2	3	3	1	1	1	1	3	3	1	3	1	13.6	13.6
H3BRG4;P22695;H3BSJ9;H3BP04;H3BUE4;H3BUI9	H3BRG4;P22695;H3BSJ9;H3BP04	4;4;3;2;1;1	4;4;3;2;1;1	4;4;3;2;1;1	Cytochrome b-c1 complex subunit 2, mitochondrial	UQCRC2	>tr|H3BRG4|H3BRG4_HUMAN Cytochrome b-c1 complex subunit 2, mitochondrial OS=Homo sapiens GN=UQCRC2 PE=3 SV=1;>sp|P22695|QCR2_HUMAN Cytochrome b-c1 complex subunit 2, mitochondrial OS=Homo sapiens GN=UQCRC2 PE=1 SV=3;>tr|H3BSJ9|H3BSJ9_HUMAN Cytochrome b-c1	6	4	4	4	3	3	3	2	0	1	2	2	0	1	4	2	3	3	3	2	0	1	2	2	0	1	4	2	3	3	3	2	0	1	2	2	0	1	4	2	16.7	16.7
H3BRL9;P78549	H3BRL9;P78549	2;2	2;2	2;2	Endonuclease III-like protein 1	NTHL1	>tr|H3BRL9|H3BRL9_HUMAN Endonuclease III-like protein 1 (Fragment) OS=Homo sapiens GN=NTHL1 PE=4 SV=1;>sp|P78549|NTHL1_HUMAN Endonuclease III-like protein 1 OS=Homo sapiens GN=NTHL1 PE=1 SV=2	2	2	2	2	0	0	1	1	1	1	1	1	0	0	1	0	0	0	1	1	1	1	1	1	0	0	1	0	0	0	1	1	1	1	1	1	0	0	1	0	11.9	11.9
H3BS18;Q8WYQ9;Q8WYQ9-2	H3BS18;Q8WYQ9;Q8WYQ9-2	1;1;1	1;1;1	1;1;1	Zinc finger CCHC domain-containing protein 14	ZCCHC14	>tr|H3BS18|H3BS18_HUMAN Zinc finger CCHC domain-containing protein 14 (Fragment) OS=Homo sapiens GN=ZCCHC14 PE=4 SV=1;>sp|Q8WYQ9|ZCH14_HUMAN Zinc finger CCHC domain-containing protein 14 OS=Homo sapiens GN=ZCCHC14 PE=1 SV=1;>sp|Q8WYQ9-2|ZCH14_HUMAN Isoform	3	1	1	1	1	0	0	1	1	1	1	1	0	0	1	0	1	0	0	1	1	1	1	1	0	0	1	0	1	0	0	1	1	1	1	1	0	0	1	0	1.4	1.4
P0C7U0;H3BS57	P0C7U0;H3BS57	7;7	7;7	7;7	Protein ELFN1	ELFN1	>sp|P0C7U0|PPR28_HUMAN Protein phosphatase 1 regulatory subunit 28 OS=Homo sapiens GN=ELFN1 PE=1 SV=1;>tr|H3BS57|H3BS57_HUMAN Protein phosphatase 1 regulatory subunit 28 OS=Homo sapiens GN=ELFN1 PE=4 SV=1	2	7	7	7	4	3	4	1	1	5	4	5	4	2	1	2	4	3	4	1	1	5	4	5	4	2	1	2	4	3	4	1	1	5	4	5	4	2	1	2	10.5	10.5
H3BUF6;C9JXV8;Q8WWM7-7;H3BSK9;H3BSQ5;H3BUE3	H3BUF6;C9JXV8;Q8WWM7-7	40;20;20;15;6;6	1;0;0;0;0;0	1;0;0;0;0;0	Ataxin-2-like protein	ATXN2L	>tr|H3BUF6|H3BUF6_HUMAN Ataxin-2-like protein OS=Homo sapiens GN=ATXN2L PE=4 SV=1;>tr|C9JXV8|C9JXV8_HUMAN Ataxin-2-like protein OS=Homo sapiens GN=ATXN2L PE=4 SV=1;>sp|Q8WWM7-7|ATX2L_HUMAN Isoform 7 of Ataxin-2-like protein OS=Homo sapiens GN=ATXN2L	6	40	1	1	34	28	32	31	33	32	32	34	39	26	27	28	1	0	1	1	1	1	1	0	1	0	1	0	1	0	1	1	1	1	1	0	1	0	1	0	47.3	2.7
H7BXC6;Q96RQ1;F8W0R1;H0YI50;F8VPA6;H0YI58;F8VR88;F8VUZ2	H7BXC6;Q96RQ1;F8W0R1;H0YI50;F8VPA6	5;5;3;3;3;2;2;2	5;5;3;3;3;2;2;2	5;5;3;3;3;2;2;2	Endoplasmic reticulum-Golgi intermediate compartment protein 2	ERGIC2;RLN3	>tr|H7BXC6|H7BXC6_HUMAN Endoplasmic reticulum-Golgi intermediate compartment protein 2 OS=Homo sapiens GN=ERGIC2 PE=4 SV=1;>sp|Q96RQ1|ERGI2_HUMAN Endoplasmic reticulum-Golgi intermediate compartment protein 2 OS=Homo sapiens GN=ERGIC2 PE=1 SV=2;>tr|F8W0R1|	8	5	5	5	3	3	3	3	3	3	5	3	3	3	3	4	3	3	3	3	3	3	5	3	3	3	3	4	3	3	3	3	3	3	5	3	3	3	3	4	16.1	16.1
H7BXF5;Q9H0E3;Q9H0E3-3;Q9H0E3-2;C9J683	H7BXF5;Q9H0E3;Q9H0E3-3;Q9H0E3-2	10;10;10;5;1	10;10;10;5;1	10;10;10;5;1	Histone deacetylase complex subunit SAP130	SAP130	>tr|H7BXF5|H7BXF5_HUMAN Histone deacetylase complex subunit SAP130 OS=Homo sapiens GN=SAP130 PE=4 SV=1;>sp|Q9H0E3|SP130_HUMAN Histone deacetylase complex subunit SAP130 OS=Homo sapiens GN=SAP130 PE=1 SV=1;>sp|Q9H0E3-3|SP130_HUMAN Isoform 3 of Histone deace	5	10	10	10	8	10	8	8	8	8	9	9	9	8	8	9	8	10	8	8	8	8	9	9	9	8	8	9	8	10	8	8	8	8	9	9	9	8	8	9	12.1	12.1
H7BXR7;P82673-2;P82673;H0YG82	H7BXR7;P82673-2;P82673;H0YG82	7;7;7;4	7;7;7;4	7;7;7;4	28S ribosomal protein S35, mitochondrial	MRPS35	>tr|H7BXR7|H7BXR7_HUMAN 28S ribosomal protein S35, mitochondrial OS=Homo sapiens GN=MRPS35 PE=4 SV=1;>sp|P82673-2|RT35_HUMAN Isoform 2 of 28S ribosomal protein S35, mitochondrial OS=Homo sapiens GN=MRPS35;>sp|P82673|RT35_HUMAN 28S ribosomal protein S35, mi	4	7	7	7	5	4	4	1	4	6	6	5	5	5	6	6	5	4	4	1	4	6	6	5	5	5	6	6	5	4	4	1	4	6	6	5	5	5	6	6	35.5	35.5
Q5H909;H7BXW3;Q9UNF1-2;Q9UNF1;Q5H907;Q9Y5V3;Q9Y5V3-2	Q5H909;H7BXW3;Q9UNF1-2;Q9UNF1;Q5H907	3;3;3;3;2;1;1	3;3;3;3;2;1;1	3;3;3;3;2;1;1	Melanoma-associated antigen D2	MAGED2	>tr|Q5H909|Q5H909_HUMAN Melanoma antigen family D, 2 OS=Homo sapiens GN=MAGED2 PE=2 SV=1;>tr|H7BXW3|H7BXW3_HUMAN Melanoma-associated antigen D2 OS=Homo sapiens GN=MAGED2 PE=4 SV=1;>sp|Q9UNF1-2|MAGD2_HUMAN Isoform 2 of Melanoma-associated antigen D2 OS=Homo	7	3	3	3	1	0	1	1	2	2	2	2	0	2	0	1	1	0	1	1	2	2	2	2	0	2	0	1	1	0	1	1	2	2	2	2	0	2	0	1	6	6
H7BXY3;Q7L2E3-3;Q7L2E3;Q7L2E3-2	H7BXY3;Q7L2E3-3;Q7L2E3;Q7L2E3-2	19;19;19;19	19;19;19;19	19;19;19;19	Putative ATP-dependent RNA helicase DHX30	DHX30	>tr|H7BXY3|H7BXY3_HUMAN Putative ATP-dependent RNA helicase DHX30 OS=Homo sapiens GN=DHX30 PE=4 SV=1;>sp|Q7L2E3-3|DHX30_HUMAN Isoform 3 of Putative ATP-dependent RNA helicase DHX30 OS=Homo sapiens GN=DHX30;>sp|Q7L2E3|DHX30_HUMAN Putative ATP-dependent RNA	4	19	19	19	10	9	9	7	10	7	9	12	9	8	10	9	10	9	9	7	10	7	9	12	9	8	10	9	10	9	9	7	10	7	9	12	9	8	10	9	19.5	19.5
Q5VW27;Q5VW30;Q5VW26;O00712;H7BYE8;Q5VW29;Q5W0Y9;O00712-2	Q5VW27;Q5VW30;Q5VW26;O00712;H7BYE8;Q5VW29;Q5W0Y9;O00712-2	4;4;4;4;4;4;2;2	3;3;3;3;3;3;1;1	3;3;3;3;3;3;1;1	Nuclear factor 1;Nuclear factor 1 B-type	NFIB	>tr|Q5VW27|Q5VW27_HUMAN Nuclear factor 1 OS=Homo sapiens GN=NFIB PE=2 SV=1;>tr|Q5VW30|Q5VW30_HUMAN Nuclear factor 1 OS=Homo sapiens GN=NFIB PE=2 SV=1;>tr|Q5VW26|Q5VW26_HUMAN Nuclear factor 1 OS=Homo sapiens GN=NFIB PE=2 SV=1;>sp|O00712|NFIB_HUMAN Nuclear f	8	4	3	3	3	2	3	2	3	4	3	4	3	2	1	2	2	1	2	1	2	3	2	3	2	1	0	1	2	1	2	1	2	3	2	3	2	1	0	1	9.9	7.6
H7BYJ8;P48960-2;P48960-3;P48960	H7BYJ8;P48960-2;P48960-3;P48960	1;1;1;1	1;1;1;1	1;1;1;1	CD97 antigen;CD97 antigen subunit alpha;CD97 antigen subunit beta	CD97	>tr|H7BYJ8|H7BYJ8_HUMAN CD97 antigen OS=Homo sapiens GN=CD97 PE=4 SV=1;>sp|P48960-2|CD97_HUMAN Isoform 2 of CD97 antigen OS=Homo sapiens GN=CD97;>sp|P48960-3|CD97_HUMAN Isoform 3 of CD97 antigen OS=Homo sapiens GN=CD97;>sp|P48960|CD97_HUMAN CD97 antigen OS	4	1	1	1	1	1	1	0	1	1	1	1	1	0	1	1	1	1	1	0	1	1	1	1	1	0	1	1	1	1	1	0	1	1	1	1	1	0	1	1	2.2	2.2
H7BYM7;Q86XZ4;F8VS10	H7BYM7;Q86XZ4;F8VS10	2;2;1	2;2;1	2;2;1	Spermatogenesis-associated serine-rich protein 2	SPATS2	>tr|H7BYM7|H7BYM7_HUMAN Spermatogenesis-associated serine-rich protein 2 OS=Homo sapiens GN=SPATS2 PE=4 SV=1;>sp|Q86XZ4|SPAS2_HUMAN Spermatogenesis-associated serine-rich protein 2 OS=Homo sapiens GN=SPATS2 PE=1 SV=1;>tr|F8VS10|F8VS10_HUMAN Spermatogenesis	3	2	2	2	1	2	2	1	1	0	0	2	0	0	1	1	1	2	2	1	1	0	0	2	0	0	1	1	1	2	2	1	1	0	0	2	0	0	1	1	4.8	4.8
H7BYT1;P48730	H7BYT1;P48730	18;18	1;1	1;1	Casein kinase I isoform delta	CSNK1D	>tr|H7BYT1|H7BYT1_HUMAN Casein kinase 1, delta, isoform CRA_a OS=Homo sapiens GN=CSNK1D PE=4 SV=1;>sp|P48730|KC1D_HUMAN Casein kinase I isoform delta OS=Homo sapiens GN=CSNK1D PE=1 SV=2	2	18	1	1	16	13	16	14	17	15	17	16	18	16	14	13	0	0	1	0	1	1	1	1	1	1	0	0	0	0	1	0	1	1	1	1	1	1	0	0	45.8	3.4
Q5JWT2;H7BYY3;Q9ULK4-4;Q9ULK4-5;Q9ULK4-3;Q9ULK4;F5H4T7;F5H685;Q9ULK4-2;B9TX55;F5H0J5;B9TX56;B9TX57	Q5JWT2;H7BYY3;Q9ULK4-4;Q9ULK4-5;Q9ULK4-3;Q9ULK4;F5H4T7;F5H685;Q9ULK4-2	19;19;19;19;19;19;15;14;14;5;3;1;1	19;19;19;19;19;19;15;14;14;5;3;1;1	19;19;19;19;19;19;15;14;14;5;3;1;1	Mediator of RNA polymerase II transcription subunit 23	MED23	>tr|Q5JWT2|Q5JWT2_HUMAN Cofactor required for Sp1 transcriptional activation, subunit 3, 130kDa OS=Homo sapiens GN=CRSP3 PE=2 SV=1;>tr|H7BYY3|H7BYY3_HUMAN Mediator of RNA polymerase II transcription subunit 23 OS=Homo sapiens GN=MED23 PE=4 SV=1;>sp|Q9ULK4-	13	19	19	19	13	10	13	9	13	13	16	12	10	11	10	12	13	10	13	9	13	13	16	12	10	11	10	12	13	10	13	9	13	13	16	12	10	11	10	12	18	18
H7BZJ3	H7BZJ3	4	1	1		PDIA3	>tr|H7BZJ3|H7BZJ3_HUMAN Thioredoxin (Fragment) OS=Homo sapiens GN=PDIA3 PE=3 SV=1	1	4	1	1	3	2	1	1	3	2	4	3	0	1	2	1	1	1	0	0	1	1	1	1	0	0	0	0	1	1	0	0	1	1	1	1	0	0	0	0	38.2	11.4
H7BZK6;P62068-4;P62068-3;P62068;P62068-2;O75317	H7BZK6;P62068-4;P62068-3;P62068;P62068-2;O75317	5;5;5;5;3;3	5;5;5;5;3;3	5;5;5;5;3;3	Ubiquitin carboxyl-terminal hydrolase 46;Ubiquitin carboxyl-terminal hydrolase 12	USP46;USP12	>tr|H7BZK6|H7BZK6_HUMAN Ubiquitin carboxyl-terminal hydrolase 46 OS=Homo sapiens GN=USP46 PE=4 SV=1;>sp|P62068-4|UBP46_HUMAN Isoform 4 of Ubiquitin carboxyl-terminal hydrolase 46 OS=Homo sapiens GN=USP46;>sp|P62068-3|UBP46_HUMAN Isoform 3 of Ubiquitin carb	6	5	5	5	5	4	5	4	3	3	5	5	4	5	5	5	5	4	5	4	3	3	5	5	4	5	5	5	5	4	5	4	3	3	5	5	4	5	5	5	15.9	15.9
H7C0N4	H7C0N4	4	3	3		SF1	>tr|H7C0N4|H7C0N4_HUMAN Splicing factor 1 (Fragment) OS=Homo sapiens GN=SF1 PE=4 SV=1	1	4	3	3	4	4	4	4	4	4	4	4	4	4	4	4	3	3	3	3	3	3	3	3	3	3	3	3	3	3	3	3	3	3	3	3	3	3	3	3	28.3	21.1
H7C1F9;Q2PPJ7-3;Q2PPJ7-2;Q2PPJ7	H7C1F9;Q2PPJ7-3;Q2PPJ7-2;Q2PPJ7	1;1;1;1	1;1;1;1	1;1;1;1	Ral GTPase-activating protein subunit alpha-2	RALGAPA2	>tr|H7C1F9|H7C1F9_HUMAN Ral GTPase-activating protein subunit alpha-2 (Fragment) OS=Homo sapiens GN=RALGAPA2 PE=4 SV=1;>sp|Q2PPJ7-3|RGPA2_HUMAN Isoform 3 of Ral GTPase-activating protein subunit alpha-2 OS=Homo sapiens GN=RALGAPA2;>sp|Q2PPJ7-2|RGPA2_HUMAN	4	1	1	1	0	0	0	0	0	0	0	0	0	0	1	0	0	0	0	0	0	0	0	0	0	0	1	0	0	0	0	0	0	0	0	0	0	0	1	0	0.5	0.5
H7C1M2;P18583-2;P18583-5;P18583-7;P18583;P18583-9;P18583-10;P18583-4;P18583-3;H7C2G8;P18583-6;H7C1S4;H7C257	H7C1M2;P18583-2;P18583-5;P18583-7;P18583;P18583-9;P18583-10;P18583-4;P18583-3	21;21;21;18;18;18;14;14;13;8;8;1;1	21;21;21;18;18;18;14;14;13;8;8;1;1	21;21;21;18;18;18;14;14;13;8;8;1;1	Protein SON	SON	>tr|H7C1M2|H7C1M2_HUMAN Protein SON (Fragment) OS=Homo sapiens GN=SON PE=4 SV=1;>sp|P18583-2|SON_HUMAN Isoform A of Protein SON OS=Homo sapiens GN=SON;>sp|P18583-5|SON_HUMAN Isoform D of Protein SON OS=Homo sapiens GN=SON;>sp|P18583-7|SON_HUMAN Isoform G o	13	21	21	21	17	17	13	12	10	14	12	12	12	13	15	15	17	17	13	12	10	14	12	12	12	13	15	15	17	17	13	12	10	14	12	12	12	13	15	15	19.5	19.5
H7C1N2;O75128-3;O75128;O75128-7;O75128-2;O75128-6;E7EQN2;H7C2C4;C9J9X1;O75128-5;O75128-4	H7C1N2;O75128-3;O75128;O75128-7;O75128-2;O75128-6	12;12;12;12;12;11;2;2;1;1;1	12;12;12;12;12;11;2;2;1;1;1	12;12;12;12;12;11;2;2;1;1;1	Protein cordon-bleu	COBL	>tr|H7C1N2|H7C1N2_HUMAN Protein cordon-bleu (Fragment) OS=Homo sapiens GN=COBL PE=4 SV=1;>sp|O75128-3|COBL_HUMAN Isoform 3 of Protein cordon-bleu OS=Homo sapiens GN=COBL;>sp|O75128|COBL_HUMAN Protein cordon-bleu OS=Homo sapiens GN=COBL PE=1 SV=2;>sp|O75128	11	12	12	12	7	9	11	8	11	11	9	11	11	11	11	10	7	9	11	8	11	11	9	11	11	11	11	10	7	9	11	8	11	11	9	11	11	11	11	10	15.5	15.5
H7C1N3;O15155;C9JTT8;Q68DU7;Q96EA0	H7C1N3;O15155;C9JTT8;Q68DU7;Q96EA0	2;2;1;1;1	2;2;1;1;1	2;2;1;1;1	BET1 homolog	BET1;DKFZp781C0425	>tr|H7C1N3|H7C1N3_HUMAN BET1 homolog (Fragment) OS=Homo sapiens GN=BET1 PE=4 SV=1;>sp|O15155|BET1_HUMAN BET1 homolog OS=Homo sapiens GN=BET1 PE=1 SV=1;>tr|C9JTT8|C9JTT8_HUMAN BET1 homolog OS=Homo sapiens GN=BET1 PE=4 SV=1;>tr|Q68DU7|Q68DU7_HUMAN BET1 homol	5	2	2	2	1	1	1	1	1	1	1	1	1	2	1	1	1	1	1	1	1	1	1	1	1	2	1	1	1	1	1	1	1	1	1	1	1	2	1	1	21.8	21.8
H7C2D4	H7C2D4	9	1	1			>tr|H7C2D4|H7C2D4_HUMAN Nuclear receptor corepressor 2 (Fragment) OS=Homo sapiens GN=NCOR2 PE=4 SV=1	1	9	1	1	8	8	8	8	8	9	9	9	8	8	9	9	0	0	0	0	0	1	1	1	1	0	1	1	0	0	0	0	0	1	1	1	1	0	1	1	55.6	9
H7C2Q8;Q99848	H7C2Q8;Q99848	5;5	5;5	5;5	Probable rRNA-processing protein EBP2	EBNA1BP2	>tr|H7C2Q8|H7C2Q8_HUMAN EBNA1 binding protein 2, isoform CRA_d OS=Homo sapiens GN=EBNA1BP2 PE=4 SV=1;>sp|Q99848|EBP2_HUMAN Probable rRNA-processing protein EBP2 OS=Homo sapiens GN=EBNA1BP2 PE=1 SV=2	2	5	5	5	3	3	3	2	3	2	3	3	4	3	3	4	3	3	3	2	3	2	3	3	4	3	3	4	3	3	3	2	3	2	3	3	4	3	3	4	17.2	17.2
H7C3Q6;Q8WV92;B8ZZL5	H7C3Q6;Q8WV92;B8ZZL5	3;3;2	3;3;2	3;3;2	MIT domain-containing protein 1	MITD1	>tr|H7C3Q6|H7C3Q6_HUMAN MIT domain-containing protein 1 (Fragment) OS=Homo sapiens GN=MITD1 PE=4 SV=1;>sp|Q8WV92|MITD1_HUMAN MIT domain-containing protein 1 OS=Homo sapiens GN=MITD1 PE=1 SV=1;>tr|B8ZZL5|B8ZZL5_HUMAN MIT domain-containing protein 1 (Fragmen	3	3	3	3	1	2	3	2	2	1	2	2	2	2	2	3	1	2	3	2	2	1	2	2	2	2	2	3	1	2	3	2	2	1	2	2	2	2	2	3	19	19
H9KV34;A8MW45;F5H7G6;C9JH30	H9KV34;A8MW45	16;14;5;5	1;1;1;1	1;1;1;1			>tr|H9KV34|H9KV34_HUMAN Uncharacterized protein OS=Homo sapiens PE=3 SV=1;>tr|A8MW45|A8MW45_HUMAN Protein KRT17P1 OS=Homo sapiens GN=KRT17P1 PE=3 SV=1	4	16	1	1	12	12	12	14	12	14	13	13	13	13	14	12	0	0	0	1	0	0	0	0	0	0	0	0	0	0	0	1	0	0	0	0	0	0	0	0	26.3	2.7
H9KV90;Q9Y566-2;Q9Y566-3;Q9Y566	H9KV90;Q9Y566-2;Q9Y566-3;Q9Y566	5;5;5;5	5;5;5;5	5;5;5;5	SH3 and multiple ankyrin repeat domains protein 1	SHANK1	>tr|H9KV90|H9KV90_HUMAN SH3 and multiple ankyrin repeat domains protein 1 OS=Homo sapiens GN=SHANK1 PE=4 SV=1;>sp|Q9Y566-2|SHAN1_HUMAN Isoform 2 of SH3 and multiple ankyrin repeat domains protein 1 OS=Homo sapiens GN=SHANK1;>sp|Q9Y566-3|SHAN1_HUMAN Isoform	4	5	5	5	3	0	4	2	4	2	4	3	4	3	1	3	3	0	4	2	4	2	4	3	4	3	1	3	3	0	4	2	4	2	4	3	4	3	1	3	4.1	4.1
H9KVB4;O15417-2;O15417;H7C3U5;C9JS29	H9KVB4;O15417-2;O15417	9;9;9;1;1	9;9;9;1;1	9;9;9;1;1	Trinucleotide repeat-containing gene 18 protein	TNRC18	>tr|H9KVB4|H9KVB4_HUMAN Trinucleotide repeat-containing gene 18 protein OS=Homo sapiens GN=TNRC18 PE=4 SV=1;>sp|O15417-2|TNC18_HUMAN Isoform 2 of Trinucleotide repeat-containing gene 18 protein OS=Homo sapiens GN=TNRC18;>sp|O15417|TNC18_HUMAN Trinucleotide	5	9	9	9	4	5	7	3	6	7	6	7	6	6	4	6	4	5	7	3	6	7	6	7	6	6	4	6	4	5	7	3	6	7	6	7	6	6	4	6	4.7	4.7
I3L085;Q8TCC3;Q8TCC3-2;B8ZZV5;Q8TCC3-3	I3L085;Q8TCC3;Q8TCC3-2;B8ZZV5;Q8TCC3-3	2;2;2;1;1	2;2;2;1;1	2;2;2;1;1	39S ribosomal protein L30, mitochondrial	MRPL30	>tr|I3L085|I3L085_HUMAN Uncharacterized protein C2orf15 OS=Homo sapiens GN=C2orf15 PE=4 SV=1;>sp|Q8TCC3|RM30_HUMAN 39S ribosomal protein L30, mitochondrial OS=Homo sapiens GN=MRPL30 PE=1 SV=1;>sp|Q8TCC3-2|RM30_HUMAN Isoform 2 of 39S ribosomal protein L30,	5	2	2	2	2	2	2	0	0	1	1	2	1	1	2	1	2	2	2	0	0	1	1	2	1	1	2	1	2	2	2	0	0	1	1	2	1	1	2	1	21.8	21.8
I3L0U5;Q6PK04	I3L0U5;Q6PK04	1;1	1;1	1;1	Coiled-coil domain-containing protein 137	CCDC137	>tr|I3L0U5|I3L0U5_HUMAN Coiled-coil domain-containing protein 137 (Fragment) OS=Homo sapiens GN=CCDC137 PE=4 SV=1;>sp|Q6PK04|CC137_HUMAN Coiled-coil domain-containing protein 137 OS=Homo sapiens GN=CCDC137 PE=1 SV=1	2	1	1	1	0	0	1	1	1	0	1	0	1	0	1	1	0	0	1	1	1	0	1	0	1	0	1	1	0	0	1	1	1	0	1	0	1	0	1	1	3.4	3.4
I3L0Z0;O15054;O15054-1	I3L0Z0;O15054;O15054-1	2;2;2	2;2;2	2;2;2	Lysine-specific demethylase 6B	KDM6B	>tr|I3L0Z0|I3L0Z0_HUMAN Lysine-specific demethylase 6B (Fragment) OS=Homo sapiens GN=KDM6B PE=4 SV=1;>sp|O15054|KDM6B_HUMAN Lysine-specific demethylase 6B OS=Homo sapiens GN=KDM6B PE=1 SV=4;>sp|O15054-1|KDM6B_HUMAN Isoform 1 of Lysine-specific demethylase	3	2	2	2	1	1	1	0	1	1	1	0	1	1	1	1	1	1	1	0	1	1	1	0	1	1	1	1	1	1	1	0	1	1	1	0	1	1	1	1	10.2	10.2
I3L476;I3L1U3;I3L419;I3L156;Q9BSJ6-2;Q9BSJ6;I3L427	I3L476;I3L1U3;I3L419;I3L156;Q9BSJ6-2;Q9BSJ6	3;3;3;3;3;3;1	3;3;3;3;3;3;1	3;3;3;3;3;3;1	Protein FAM64A	FAM64A	>tr|I3L476|I3L476_HUMAN Protein FAM64A OS=Homo sapiens GN=FAM64A PE=4 SV=1;>tr|I3L1U3|I3L1U3_HUMAN Family with sequence similarity 64, member A, isoform CRA_a OS=Homo sapiens GN=FAM64A PE=4 SV=1;>tr|I3L419|I3L419_HUMAN Protein FAM64A OS=Homo sapiens GN=FAM	7	3	3	3	3	3	3	3	2	2	2	3	2	3	2	2	3	3	3	3	2	2	2	3	2	3	2	2	3	3	3	3	2	2	2	3	2	3	2	2	21.5	21.5
I3L1L3;Q9BQG0;Q9BQG0-2;E7EN09;I3L2H8	I3L1L3;Q9BQG0;Q9BQG0-2;E7EN09	12;12;12;8;2	12;12;12;8;2	12;12;12;8;2	Myb-binding protein 1A	MYBBP1A	>tr|I3L1L3|I3L1L3_HUMAN Myb-binding protein 1A (Fragment) OS=Homo sapiens GN=MYBBP1A PE=4 SV=1;>sp|Q9BQG0|MBB1A_HUMAN Myb-binding protein 1A OS=Homo sapiens GN=MYBBP1A PE=1 SV=2;>sp|Q9BQG0-2|MBB1A_HUMAN Isoform 2 of Myb-binding protein 1A OS=Homo sapiens G	5	12	12	12	5	4	8	4	1	5	4	2	8	5	6	7	5	4	8	4	1	5	4	2	8	5	6	7	5	4	8	4	1	5	4	2	8	5	6	7	10.9	10.9
I3L1P8;Q02978;F5GY65	I3L1P8;Q02978;F5GY65	7;7;5	7;7;5	7;7;5	Mitochondrial 2-oxoglutarate/malate carrier protein	SLC25A11	>tr|I3L1P8|I3L1P8_HUMAN Mitochondrial 2-oxoglutarate/malate carrier protein (Fragment) OS=Homo sapiens GN=SLC25A11 PE=4 SV=1;>sp|Q02978|M2OM_HUMAN Mitochondrial 2-oxoglutarate/malate carrier protein OS=Homo sapiens GN=SLC25A11 PE=1 SV=3;>tr|F5GY65|F5GY65_H	3	7	7	7	6	3	4	3	2	3	4	3	4	5	6	4	6	3	4	3	2	3	4	3	4	5	6	4	6	3	4	3	2	3	4	3	4	5	6	4	30.1	30.1
I3L1R4;I3L4S8;I3NI00;P35613-3;P35613-4;P35613-2;P35613;I3L4U1;I3L4L2;I3L192	I3L1R4;I3L4S8;I3NI00;P35613-3;P35613-4;P35613-2;P35613;I3L4U1;I3L4L2;I3L192	3;3;3;3;3;3;3;2;2;2	3;3;3;3;3;3;3;2;2;2	3;3;3;3;3;3;3;2;2;2	Basigin	BSG	>tr|I3L1R4|I3L1R4_HUMAN Basigin (Fragment) OS=Homo sapiens GN=BSG PE=4 SV=1;>tr|I3L4S8|I3L4S8_HUMAN Basigin OS=Homo sapiens GN=BSG PE=4 SV=1;>tr|I3NI00|I3NI00_HUMAN Basigin OS=Homo sapiens GN=BSG PE=4 SV=1;>sp|P35613-3|BASI_HUMAN Isoform 3 of Basigin OS=Ho	10	3	3	3	0	2	1	1	1	0	0	2	1	1	1	1	0	2	1	1	1	0	0	2	1	1	1	1	0	2	1	1	1	0	0	2	1	1	1	1	38.7	38.7
I3L2J0;Q96RK0	I3L2J0;Q96RK0	5;3	5;3	5;3	Protein capicua homolog	CIC	>tr|I3L2J0|I3L2J0_HUMAN Protein capicua homolog OS=Homo sapiens GN=CIC PE=4 SV=1;>sp|Q96RK0|CIC_HUMAN Protein capicua homolog OS=Homo sapiens GN=CIC PE=1 SV=2	2	5	5	5	0	2	2	0	0	1	1	1	0	1	1	2	0	2	2	0	0	1	1	1	0	1	1	2	0	2	2	0	0	1	1	1	0	1	1	2	4	4
I3L3P7;P62244;I3L246;H3BN98;H3BVC7;H3BV27;H3BT37;I3L303	I3L3P7;P62244;I3L246;H3BN98	5;5;3;3;2;1;1;1	5;5;3;3;2;1;1;1	5;5;3;3;2;1;1;1	40S ribosomal protein S15a	RPS15A	>tr|I3L3P7|I3L3P7_HUMAN 40S ribosomal protein S15a OS=Homo sapiens GN=RPS15A PE=4 SV=1;>sp|P62244|RS15A_HUMAN 40S ribosomal protein S15a OS=Homo sapiens GN=RPS15A PE=1 SV=2;>tr|I3L246|I3L246_HUMAN 40S ribosomal protein S15a OS=Homo sapiens GN=RPS15A PE=4 S	8	5	5	5	5	3	5	4	5	4	5	5	3	5	5	5	5	3	5	4	5	4	5	5	3	5	5	5	5	3	5	4	5	4	5	5	3	5	5	5	50	50
O00178	O00178	1	1	1	GTP-binding protein 1	GTPBP1	>sp|O00178|GTPB1_HUMAN GTP-binding protein 1 OS=Homo sapiens GN=GTPBP1 PE=1 SV=3	1	1	1	1	0	0	1	0	0	0	0	0	0	0	0	0	0	0	1	0	0	0	0	0	0	0	0	0	0	0	1	0	0	0	0	0	0	0	0	0	2.4	2.4
O00257;O00257-3;F8WCW6;I3L4F1	O00257	13;5;1;1	13;5;1;1	13;5;1;1	E3 SUMO-protein ligase CBX4	CBX4	>sp|O00257|CBX4_HUMAN E3 SUMO-protein ligase CBX4 OS=Homo sapiens GN=CBX4 PE=1 SV=3	4	13	13	13	10	10	9	9	12	11	12	10	12	7	8	8	10	10	9	9	12	11	12	10	12	7	8	8	10	10	9	9	12	11	12	10	12	7	8	8	25.9	25.9
O00264;B7Z1L3	O00264;B7Z1L3	2;1	2;1	2;1	Membrane-associated progesterone receptor component 1	PGRMC1	>sp|O00264|PGRC1_HUMAN Membrane-associated progesterone receptor component 1 OS=Homo sapiens GN=PGRMC1 PE=1 SV=3;>tr|B7Z1L3|B7Z1L3_HUMAN Membrane-associated progesterone receptor component 1 OS=Homo sapiens GN=PGRMC1 PE=2 SV=1	2	2	2	2	0	0	2	0	1	0	2	2	1	1	1	1	0	0	2	0	1	0	2	2	1	1	1	1	0	0	2	0	1	0	2	2	1	1	1	1	11.3	11.3
Q5TBP5;O00268;F5H0K4;Q92750	Q5TBP5;O00268	10;10;1;1	10;10;1;1	10;10;1;1	Transcription initiation factor TFIID subunit 4	TAF4	>tr|Q5TBP5|Q5TBP5_HUMAN TAF4 RNA polymerase II, TATA box binding protein (TBP)-associated factor, 135kDa (Fragment) OS=Homo sapiens GN=TAF4 PE=2 SV=1;>sp|O00268|TAF4_HUMAN Transcription initiation factor TFIID subunit 4 OS=Homo sapiens GN=TAF4 PE=1 SV=2	4	10	10	10	3	4	3	2	5	8	5	7	4	4	4	5	3	4	3	2	5	8	5	7	4	4	4	5	3	4	3	2	5	8	5	7	4	4	4	5	19.2	19.2
O00308;F5H213;H3BRF3;H3BRX8;H3BS79;F5H5M4;H3BPJ8;H0YBS9;F5H217;Q96J02-2;Q96J02	O00308;F5H213	16;13;6;3;3;3;2;1;1;1;1	16;13;6;3;3;3;2;1;1;1;1	15;12;5;3;3;3;2;0;0;0;0	NEDD4-like E3 ubiquitin-protein ligase WWP2	WWP2	>sp|O00308|WWP2_HUMAN NEDD4-like E3 ubiquitin-protein ligase WWP2 OS=Homo sapiens GN=WWP2 PE=1 SV=2;>tr|F5H213|F5H213_HUMAN E3 ubiquitin-protein ligase OS=Homo sapiens GN=WWP2 PE=4 SV=1	11	16	16	15	12	12	12	9	12	12	15	13	9	12	11	14	12	12	12	9	12	12	15	13	9	12	11	14	11	11	11	8	11	11	14	12	8	11	10	13	24	24
O00391-2;O00391;A8MXT8	O00391-2;O00391	6;6;1	6;6;1	6;6;1	Sulfhydryl oxidase 1	QSOX1	>sp|O00391-2|QSOX1_HUMAN Isoform 2 of Sulfhydryl oxidase 1 OS=Homo sapiens GN=QSOX1;>sp|O00391|QSOX1_HUMAN Sulfhydryl oxidase 1 OS=Homo sapiens GN=QSOX1 PE=1 SV=3	3	6	6	6	4	3	2	3	1	1	1	2	1	1	2	2	4	3	2	3	1	1	1	2	1	1	2	2	4	3	2	3	1	1	1	2	1	1	2	2	14.9	14.9
O00411	O00411	4	4	4	DNA-directed RNA polymerase, mitochondrial	POLRMT	>sp|O00411|RPOM_HUMAN DNA-directed RNA polymerase, mitochondrial OS=Homo sapiens GN=POLRMT PE=1 SV=2	1	4	4	4	1	0	1	0	1	1	1	2	3	1	3	0	1	0	1	0	1	1	1	2	3	1	3	0	1	0	1	0	1	1	1	2	3	1	3	0	4.2	4.2
O00425;F8WD15;O00425-2;C9JT33;Q9NZI8	O00425	3;1;1;1;1	2;1;0;0;0	2;1;0;0;0	Insulin-like growth factor 2 mRNA-binding protein 3	IGF2BP3	>sp|O00425|IF2B3_HUMAN Insulin-like growth factor 2 mRNA-binding protein 3 OS=Homo sapiens GN=IGF2BP3 PE=1 SV=2	5	3	2	2	3	1	2	3	2	2	3	1	3	2	3	3	2	1	1	2	1	1	2	0	2	1	2	2	2	1	1	2	1	1	2	0	2	1	2	2	7.6	5.4
O00459;E9PFP1;E7EMU8;F6TDL0;Q92569-3;Q92569-2;Q92569	O00459;E9PFP1	7;5;1;1;1;1;1	7;5;1;1;1;1;1	6;5;0;0;0;0;0	Phosphatidylinositol 3-kinase regulatory subunit beta	PIK3R2	>sp|O00459|P85B_HUMAN Phosphatidylinositol 3-kinase regulatory subunit beta OS=Homo sapiens GN=PIK3R2 PE=1 SV=2;>tr|E9PFP1|E9PFP1_HUMAN Phosphatidylinositol 3-kinase regulatory subunit beta OS=Homo sapiens GN=PIK3R2 PE=4 SV=1	7	7	7	6	1	1	4	3	2	0	0	4	3	3	0	4	1	1	4	3	2	0	0	4	3	3	0	4	1	1	3	3	2	0	0	3	3	3	0	4	14	14
O00468	O00468	3	3	3	Agrin;Agrin N-terminal 110 kDa subunit;Agrin C-terminal 110 kDa subunit;Agrin C-terminal 90 kDa fragment;Agrin C-terminal 22 kDa fragment	AGRN	>sp|O00468|AGRIN_HUMAN Agrin OS=Homo sapiens GN=AGRN PE=1 SV=4	1	3	3	3	2	1	1	0	0	0	0	1	0	0	1	0	2	1	1	0	0	0	0	1	0	0	1	0	2	1	1	0	0	0	0	1	0	0	1	0	1.8	1.8
O00469-2;E7ETU9;O00469;B3KWS3;C9JXZ0;F8WEW3	O00469-2;E7ETU9;O00469;B3KWS3	32;31;30;18;11;1	32;31;30;18;11;1	32;31;30;18;11;1	Procollagen-lysine,2-oxoglutarate 5-dioxygenase 2	PLOD2	>sp|O00469-2|PLOD2_HUMAN Isoform 2 of Procollagen-lysine,2-oxoglutarate 5-dioxygenase 2 OS=Homo sapiens GN=PLOD2;>tr|E7ETU9|E7ETU9_HUMAN Procollagen-lysine,2-oxoglutarate 5-dioxygenase 2 OS=Homo sapiens GN=PLOD2 PE=4 SV=1;>sp|O00469|PLOD2_HUMAN Procollagen	6	32	32	32	28	30	27	29	28	29	29	30	29	28	26	28	28	30	27	29	28	29	29	30	29	28	26	28	28	30	27	29	28	29	29	30	29	28	26	28	49.2	49.2
O00472;B4DNK7;H0Y8G1;D6RC27	O00472;B4DNK7	6;4;1;1	6;4;1;1	6;4;1;1	RNA polymerase II elongation factor ELL2	ELL2	>sp|O00472|ELL2_HUMAN RNA polymerase II elongation factor ELL2 OS=Homo sapiens GN=ELL2 PE=1 SV=2;>tr|B4DNK7|B4DNK7_HUMAN RNA polymerase II elongation factor ELL2 OS=Homo sapiens GN=ELL2 PE=2 SV=1	4	6	6	6	3	3	5	4	3	2	2	2	2	1	2	3	3	3	5	4	3	2	2	2	2	1	2	3	3	3	5	4	3	2	2	2	2	1	2	3	14.8	14.8
O00483	O00483	4	4	4	Cytochrome c oxidase subunit NDUFA4	NDUFA4	>sp|O00483|NDUA4_HUMAN NADH dehydrogenase [ubiquinone] 1 alpha subcomplex subunit 4 OS=Homo sapiens GN=NDUFA4 PE=1 SV=1	1	4	4	4	3	3	2	2	3	3	3	4	3	4	3	3	3	3	2	2	3	3	3	4	3	4	3	3	3	3	2	2	3	3	3	4	3	4	3	3	46.9	46.9
O00487	O00487	1	1	1	26S proteasome non-ATPase regulatory subunit 14	PSMD14	>sp|O00487|PSDE_HUMAN 26S proteasome non-ATPase regulatory subunit 14 OS=Homo sapiens GN=PSMD14 PE=1 SV=1	1	1	1	1	0	0	0	0	0	0	0	1	0	0	0	0	0	0	0	0	0	0	0	1	0	0	0	0	0	0	0	0	0	0	0	1	0	0	0	0	4.2	4.2
O00488;A9J4F5	O00488;A9J4F5	3;2	3;2	3;2	Zinc finger protein 593	ZNF593	>sp|O00488|ZN593_HUMAN Zinc finger protein 593 OS=Homo sapiens GN=ZNF593 PE=1 SV=2;>tr|A9J4F5|A9J4F5_HUMAN Zinc finger protein 593 OS=Homo sapiens GN=ZNF593 PE=4 SV=1	2	3	3	3	0	2	0	0	0	1	0	0	2	2	3	2	0	2	0	0	0	1	0	0	2	2	3	2	0	2	0	0	0	1	0	0	2	2	3	2	23.9	23.9
O00505;H0Y4S9	O00505	7;2	7;2	6;2	Importin subunit alpha-4	KPNA3	>sp|O00505|IMA3_HUMAN Importin subunit alpha-3 OS=Homo sapiens GN=KPNA3 PE=1 SV=2	2	7	7	6	4	4	4	6	3	3	3	4	4	4	3	5	4	4	4	6	3	3	3	4	4	4	3	5	4	4	4	5	3	3	3	4	4	4	3	5	17.5	17.5
O00567;H0Y653;E9PDI8;H0YDU4;Q5JXT2	O00567	17;7;7;7;6	17;7;7;7;6	17;7;7;7;6	Nucleolar protein 56	NOP56	>sp|O00567|NOP56_HUMAN Nucleolar protein 56 OS=Homo sapiens GN=NOP56 PE=1 SV=4	5	17	17	17	12	13	16	13	5	9	9	9	11	11	14	13	12	13	16	13	5	9	9	9	11	11	14	13	12	13	16	13	5	9	9	9	11	11	14	13	26.9	26.9
O00571-2;O00571;B4DXX7;O15523;B4E132;B4DLU5	O00571-2;O00571;B4DXX7;O15523;B4E132	10;10;7;7;6;4	9;9;6;6;5;3	9;9;6;6;5;3	ATP-dependent RNA helicase DDX3X;ATP-dependent RNA helicase DDX3Y	DDX3X;DDX3Y	>sp|O00571-2|DDX3X_HUMAN Isoform 2 of ATP-dependent RNA helicase DDX3X OS=Homo sapiens GN=DDX3X;>sp|O00571|DDX3X_HUMAN ATP-dependent RNA helicase DDX3X OS=Homo sapiens GN=DDX3X PE=1 SV=3;>tr|B4DXX7|B4DXX7_HUMAN ATP-dependent RNA helicase DDX3Y OS=Homo sapi	6	10	9	9	1	3	7	6	5	2	4	5	2	2	1	3	1	2	6	5	4	1	3	4	1	2	0	2	1	2	6	5	4	1	3	4	1	2	0	2	17.8	16.1
O00629;H7C4F6	O00629	5;1	4;1	4;1	Importin subunit alpha-3	KPNA4	>sp|O00629|IMA4_HUMAN Importin subunit alpha-4 OS=Homo sapiens GN=KPNA4 PE=1 SV=1	2	5	4	4	2	3	2	3	1	1	2	2	2	3	2	2	2	3	2	2	1	1	2	2	2	3	2	2	2	3	2	2	1	1	2	2	2	3	2	2	10.6	8.8
O00767	O00767	6	6	6	Acyl-CoA desaturase	SCD	>sp|O00767|ACOD_HUMAN Acyl-CoA desaturase OS=Homo sapiens GN=SCD PE=1 SV=2	1	6	6	6	4	5	5	2	4	1	3	3	3	3	4	3	4	5	5	2	4	1	3	3	3	3	4	3	4	5	5	2	4	1	3	3	3	3	4	3	25.1	25.1
O14497-3;O14497;O14497-2;H0Y488;Q96SM7	O14497-3;O14497;O14497-2;H0Y488	4;4;3;2;1	3;3;2;2;1	3;3;2;2;1	AT-rich interactive domain-containing protein 1A	ARID1A	>sp|O14497-3|ARI1A_HUMAN Isoform 3 of AT-rich interactive domain-containing protein 1A OS=Homo sapiens GN=ARID1A;>sp|O14497|ARI1A_HUMAN AT-rich interactive domain-containing protein 1A OS=Homo sapiens GN=ARID1A PE=1 SV=3;>sp|O14497-2|ARI1A_HUMAN Isoform 2	5	4	3	3	3	1	2	1	1	3	3	2	1	2	2	2	2	0	1	0	0	2	2	1	0	1	1	1	2	0	1	0	0	2	2	1	0	1	1	1	3	2
O14578;O14578-4;H7BYJ3;O14578-3;O14578-2	O14578;O14578-4;H7BYJ3;O14578-3	34;34;31;29;5	34;34;31;29;5	34;34;31;29;5	Citron Rho-interacting kinase	CIT	>sp|O14578|CTRO_HUMAN Citron Rho-interacting kinase OS=Homo sapiens GN=CIT PE=1 SV=2;>sp|O14578-4|CTRO_HUMAN Isoform 4 of Citron Rho-interacting kinase OS=Homo sapiens GN=CIT;>tr|H7BYJ3|H7BYJ3_HUMAN Citron Rho-interacting kinase (Fragment) OS=Homo sapiens	5	34	34	34	12	17	18	10	16	22	20	25	10	7	8	8	12	17	18	10	16	22	20	25	10	7	8	8	12	17	18	10	16	22	20	25	10	7	8	8	20.6	20.6
Q5T6N2;Q5T6N4;O14639-2;O14639;F8WAB0;F8W8M4;A6NKJ2;A6NCD9;F8WAB1;Q5JVV3	Q5T6N2;Q5T6N4;O14639-2;O14639;F8WAB0;F8W8M4;A6NKJ2;A6NCD9;F8WAB1;Q5JVV3	32;32;32;32;31;31;31;31;28;23	32;32;32;32;31;31;31;31;28;23	4;4;4;4;4;4;4;4;4;2	Actin-binding LIM protein 1	ABLIM1	>tr|Q5T6N2|Q5T6N2_HUMAN Actin binding LIM protein 1 OS=Homo sapiens GN=ABLIM1 PE=2 SV=1;>tr|Q5T6N4|Q5T6N4_HUMAN Actin binding LIM protein 1 OS=Homo sapiens GN=ABLIM1 PE=2 SV=1;>sp|O14639-2|ABLM1_HUMAN Isoform 2 of Actin-binding LIM protein 1 OS=Homo sapien	10	32	32	4	22	23	19	19	24	29	27	26	19	22	21	24	22	23	19	19	24	29	27	26	19	22	21	24	0	1	0	0	0	3	0	2	0	2	0	1	59.7	59.7
O14646-2;O14646;E7EPE9;O14647-2;O14647;H0Y8V4	O14646-2;O14646	7;7;2;2;2;1	6;6;2;1;1;1	6;6;2;1;1;1	Chromodomain-helicase-DNA-binding protein 1	CHD1	>sp|O14646-2|CHD1_HUMAN Isoform 2 of Chromodomain-helicase-DNA-binding protein 1 OS=Homo sapiens GN=CHD1;>sp|O14646|CHD1_HUMAN Chromodomain-helicase-DNA-binding protein 1 OS=Homo sapiens GN=CHD1 PE=1 SV=2	6	7	6	6	4	4	7	4	3	2	3	3	2	3	3	4	3	3	6	3	2	1	2	2	1	2	2	3	3	3	6	3	2	1	2	2	1	2	2	3	5.9	5.3
O14672;H0YK87;C9J9B4;A8MY20;B4DU28	O14672;H0YK87;C9J9B4	3;2;2;1;1	3;2;2;1;1	3;2;2;1;1	Disintegrin and metalloproteinase domain-containing protein 10	ADAM10	>sp|O14672|ADA10_HUMAN Disintegrin and metalloproteinase domain-containing protein 10 OS=Homo sapiens GN=ADAM10 PE=1 SV=1;>tr|H0YK87|H0YK87_HUMAN Disintegrin and metalloproteinase domain-containing protein 10 (Fragment) OS=Homo sapiens GN=ADAM10 PE=4 SV=1;	5	3	3	3	0	0	1	1	1	1	1	1	2	0	2	0	0	0	1	1	1	1	1	1	2	0	2	0	0	0	1	1	1	1	1	1	2	0	2	0	4.9	4.9
O14681;E9PQN7;E9PK61;E9PNX3;E9PLB8;E9PL33;E9PM05;E9PS58;A6NES3	O14681;E9PQN7;E9PK61;E9PNX3;E9PLB8;E9PL33;E9PM05;E9PS58;A6NES3	2;1;1;1;1;1;1;1;1	2;1;1;1;1;1;1;1;1	2;1;1;1;1;1;1;1;1	Etoposide-induced protein 2.4 homolog	EI24	>sp|O14681|EI24_HUMAN Etoposide-induced protein 2.4 homolog OS=Homo sapiens GN=EI24 PE=1 SV=4;>tr|E9PQN7|E9PQN7_HUMAN Etoposide-induced protein 2.4 homolog (Fragment) OS=Homo sapiens GN=EI24 PE=4 SV=1;>tr|E9PK61|E9PK61_HUMAN Etoposide-induced protein 2.4 h	9	2	2	2	1	1	1	1	2	0	1	2	1	0	0	0	1	1	1	1	2	0	1	2	1	0	0	0	1	1	1	1	2	0	1	2	1	0	0	0	5.3	5.3
O14734;E9PRD4;H7C5A7;E9PJN0;A6NDT2	O14734;E9PRD4;H7C5A7;E9PJN0;A6NDT2	3;2;2;2;2	3;2;2;2;2	3;2;2;2;2	Acyl-coenzyme A thioesterase 8	ACOT8	>sp|O14734|ACOT8_HUMAN Acyl-coenzyme A thioesterase 8 OS=Homo sapiens GN=ACOT8 PE=1 SV=1;>tr|E9PRD4|E9PRD4_HUMAN Acyl-coenzyme A thioesterase 8 OS=Homo sapiens GN=ACOT8 PE=4 SV=1;>tr|H7C5A7|H7C5A7_HUMAN Acyl-coenzyme A thioesterase 8 (Fragment) OS=Homo sap	5	3	3	3	1	2	2	2	0	0	1	2	2	2	3	3	1	2	2	2	0	0	1	2	2	2	3	3	1	2	2	2	0	0	1	2	2	2	3	3	12.9	12.9
O14737	O14737	1	1	1	Programmed cell death protein 5	PDCD5	>sp|O14737|PDCD5_HUMAN Programmed cell death protein 5 OS=Homo sapiens GN=PDCD5 PE=1 SV=3	1	1	1	1	0	0	1	0	0	0	0	0	0	0	0	0	0	0	1	0	0	0	0	0	0	0	0	0	0	0	1	0	0	0	0	0	0	0	0	0	8.8	8.8
O14745;E7EV06	O14745	20;8	20;8	20;8	Na(+)/H(+) exchange regulatory cofactor NHE-RF1	SLC9A3R1	>sp|O14745|NHRF1_HUMAN Na(+)/H(+) exchange regulatory cofactor NHE-RF1 OS=Homo sapiens GN=SLC9A3R1 PE=1 SV=4	2	20	20	20	15	18	17	18	19	19	18	17	15	15	16	16	15	18	17	18	19	19	18	17	15	15	16	16	15	18	17	18	19	19	18	17	15	15	16	16	60.3	60.3
O14818;O14818-2;H0Y586;F5H3G5;Q8TAA3-2;Q8TAA3-5;Q8TAA3;F5GY34;Q5JXJ2	O14818;O14818-2;H0Y586;F5H3G5;Q8TAA3-2;Q8TAA3-5;Q8TAA3	8;6;5;4;4;4;4;3;3	8;6;5;4;4;4;4;3;3	8;6;5;4;4;4;4;3;3	Proteasome subunit alpha type-7;Proteasome subunit alpha type-7-like	PSMA7;PSMA8	>sp|O14818|PSA7_HUMAN Proteasome subunit alpha type-7 OS=Homo sapiens GN=PSMA7 PE=1 SV=1;>sp|O14818-2|PSA7_HUMAN Isoform 2 of Proteasome subunit alpha type-7 OS=Homo sapiens GN=PSMA7;>tr|H0Y586|H0Y586_HUMAN Proteasome subunit alpha type-7 (Fragment) OS=Hom	9	8	8	8	4	5	5	5	1	3	3	3	2	5	6	4	4	5	5	5	1	3	3	3	2	5	6	4	4	5	5	5	1	3	3	3	2	5	6	4	44.4	44.4
O14874;Q96G95;A8MY43;H3BTL2;H3BS02;H3BNP3;H3BUV3	O14874;Q96G95;A8MY43;H3BTL2;H3BS02	7;6;6;4;4;2;1	7;6;6;4;4;2;1	7;6;6;4;4;2;1	[3-methyl-2-oxobutanoate dehydrogenase [lipoamide]] kinase, mitochondrial	BCKDK	>sp|O14874|BCKD_HUMAN [3-methyl-2-oxobutanoate dehydrogenase [lipoamide]] kinase, mitochondrial OS=Homo sapiens GN=BCKDK PE=1 SV=2;>tr|Q96G95|Q96G95_HUMAN BCKDK protein OS=Homo sapiens GN=BCKDK PE=2 SV=1;>tr|A8MY43|A8MY43_HUMAN Branched chain ketoacid dehy	7	7	7	7	5	5	4	5	5	3	5	6	5	4	4	3	5	5	4	5	5	3	5	6	5	4	4	3	5	5	4	5	5	3	5	6	5	4	4	3	32.8	32.8
O14880	O14880	1	1	1	Microsomal glutathione S-transferase 3	MGST3	>sp|O14880|MGST3_HUMAN Microsomal glutathione S-transferase 3 OS=Homo sapiens GN=MGST3 PE=1 SV=1	1	1	1	1	1	1	1	0	0	0	0	0	1	1	0	1	1	1	1	0	0	0	0	0	1	1	0	1	1	1	1	0	0	0	0	0	1	1	0	1	9.9	9.9
O14925;Q5SRD1;E7EP42;C9JV18;C9JSY4;E9PB91;B1APJ0	O14925;Q5SRD1;E7EP42;C9JV18;C9JSY4;E9PB91;B1APJ0	2;2;1;1;1;1;1	2;2;1;1;1;1;1	2;2;1;1;1;1;1	Mitochondrial import inner membrane translocase subunit Tim23;Putative mitochondrial import inner membrane translocase subunit Tim23B	TIMM23;TIMM23B	>sp|O14925|TIM23_HUMAN Mitochondrial import inner membrane translocase subunit Tim23 OS=Homo sapiens GN=TIMM23 PE=1 SV=1;>sp|Q5SRD1|TI23B_HUMAN Putative mitochondrial import inner membrane translocase subunit Tim23B OS=Homo sapiens GN=TIMM23B PE=5 SV=2;>tr	7	2	2	2	1	2	2	0	0	1	0	0	2	2	2	2	1	2	2	0	0	1	0	0	2	2	2	2	1	2	2	0	0	1	0	0	2	2	2	2	12.9	12.9
O14949	O14949	3	3	3	Cytochrome b-c1 complex subunit 8	UQCRQ	>sp|O14949|QCR8_HUMAN Cytochrome b-c1 complex subunit 8 OS=Homo sapiens GN=UQCRQ PE=1 SV=4	1	3	3	3	2	2	1	2	0	1	1	1	3	3	2	2	2	2	1	2	0	1	1	1	3	3	2	2	2	2	1	2	0	1	1	1	3	3	2	2	34.1	34.1
P19105;O14950;P24844;P24844-2	P19105;O14950;P24844	7;7;4;2	7;7;4;2	7;7;4;2	Myosin regulatory light chain 12A;Myosin regulatory light chain 12B;Myosin regulatory light polypeptide 9	MYL12A;MYL12B;MYL9	>sp|P19105|ML12A_HUMAN Myosin regulatory light chain 12A OS=Homo sapiens GN=MYL12A PE=1 SV=2;>sp|O14950|ML12B_HUMAN Myosin regulatory light chain 12B OS=Homo sapiens GN=MYL12B PE=1 SV=2;>sp|P24844|MYL9_HUMAN Myosin regulatory light polypeptide 9 OS=Homo sa	4	7	7	7	2	2	2	6	0	1	1	0	1	0	0	6	2	2	2	6	0	1	1	0	1	0	0	6	2	2	2	6	0	1	1	0	1	0	0	6	50.9	50.9
O14965;A3KFJ0;Q5QPD4;A3KFJ1;Q5QPD2;Q9UQB9-2;Q9UQB9-3;Q9UQB9	O14965;A3KFJ0;Q5QPD4	6;4;3;2;1;1;1;1	5;3;2;1;1;0;0;0	5;3;2;1;1;0;0;0	Aurora kinase A	AURKA	>sp|O14965|AURKA_HUMAN Aurora kinase A OS=Homo sapiens GN=AURKA PE=1 SV=2;>tr|A3KFJ0|A3KFJ0_HUMAN Aurora kinase A OS=Homo sapiens GN=AURKA PE=3 SV=1;>tr|Q5QPD4|Q5QPD4_HUMAN Aurora kinase A (Fragment) OS=Homo sapiens GN=AURKA PE=2 SV=1	8	6	5	5	4	4	5	3	3	4	6	4	5	4	2	5	4	4	5	3	3	4	5	4	5	4	2	5	4	4	5	3	3	4	5	4	5	4	2	5	23.1	21.1
O14979-3;O14979-2;O14979	O14979-3;O14979-2;O14979	3;3;3	2;2;2	2;2;2	Heterogeneous nuclear ribonucleoprotein D-like	HNRNPDL	>sp|O14979-3|HNRDL_HUMAN Isoform 3 of Heterogeneous nuclear ribonucleoprotein D-like OS=Homo sapiens GN=HNRPDL;>sp|O14979-2|HNRDL_HUMAN Isoform 2 of Heterogeneous nuclear ribonucleoprotein D-like OS=Homo sapiens GN=HNRPDL;>sp|O14979|HNRDL_HUMAN Heterogeneo	3	3	2	2	1	2	2	2	3	3	3	2	2	2	2	2	0	1	1	1	2	2	2	1	1	1	1	1	0	1	1	1	2	2	2	1	1	1	1	1	11.9	8.6
O15014;H3BP69	O15014	37;1	37;1	37;1	Zinc finger protein 609	ZNF609	>sp|O15014|ZN609_HUMAN Zinc finger protein 609 OS=Homo sapiens GN=ZNF609 PE=1 SV=2	2	37	37	37	24	27	31	28	32	31	29	28	27	25	29	27	24	27	31	28	32	31	29	28	27	25	29	27	24	27	31	28	32	31	29	28	27	25	29	27	36.8	36.8
O15027-2;O15027-4;O15027-3;O15027;O15027-5;A4QN19;C9JVR0;F6VLX6;Q8N9G1;H0Y5S1	O15027-2;O15027-4;O15027-3;O15027;O15027-5;A4QN19	8;8;8;8;8;6;2;1;1;1	8;8;8;8;8;6;2;1;1;1	8;8;8;8;8;6;2;1;1;1	Protein transport protein Sec16A	SEC16A	>sp|O15027-2|SC16A_HUMAN Isoform 2 of Protein transport protein Sec16A OS=Homo sapiens GN=SEC16A;>sp|O15027-4|SC16A_HUMAN Isoform 4 of Protein transport protein Sec16A OS=Homo sapiens GN=SEC16A;>sp|O15027-3|SC16A_HUMAN Isoform 3 of Protein transport protei	10	8	8	8	4	3	6	5	5	3	3	7	6	4	3	5	4	3	6	5	5	3	3	7	6	4	3	5	4	3	6	5	5	3	3	7	6	4	3	5	5.5	5.5
O15042-2;O15042;E7ET15;H0Y8D9;O15042-3;C9JB80;E7EW00;H7C4V2;C9J5L1;C9JDJ7;H7C4P4	O15042-2;O15042;E7ET15;H0Y8D9;O15042-3	56;56;54;28;28;27;26;11;10;9;1	56;56;54;28;28;27;26;11;10;9;1	56;56;54;28;28;27;26;11;10;9;1	U2 snRNP-associated SURP motif-containing protein	U2SURP	>sp|O15042-2|SR140_HUMAN Isoform 2 of U2 snRNP-associated SURP motif-containing protein OS=Homo sapiens GN=U2SURP;>sp|O15042|SR140_HUMAN U2 snRNP-associated SURP motif-containing protein OS=Homo sapiens GN=U2SURP PE=1 SV=2;>tr|E7ET15|E7ET15_HUMAN U2 snRNP-	11	56	56	56	49	51	47	44	45	48	48	47	55	49	49	49	49	51	47	44	45	48	48	47	55	49	49	49	49	51	47	44	45	48	48	47	55	49	49	49	50.2	50.2
O15083;H7C4G9	O15083;H7C4G9	6;5	6;5	5;4	ERC protein 2	ERC2	>sp|O15083|ERC2_HUMAN ERC protein 2 OS=Homo sapiens GN=ERC2 PE=1 SV=3;>tr|H7C4G9|H7C4G9_HUMAN ERC protein 2 (Fragment) OS=Homo sapiens GN=ERC2 PE=4 SV=1	2	6	6	5	3	3	2	4	2	2	4	2	1	1	1	1	3	3	2	4	2	2	4	2	1	1	1	1	2	2	1	3	2	1	3	1	0	0	1	1	8.4	8.4
O15116	O15116	1	1	1	U6 snRNA-associated Sm-like protein LSm1	LSM1	>sp|O15116|LSM1_HUMAN U6 snRNA-associated Sm-like protein LSm1 OS=Homo sapiens GN=LSM1 PE=1 SV=1	1	1	1	1	1	0	1	1	0	0	0	0	0	1	0	1	1	0	1	1	0	0	0	0	0	1	0	1	1	0	1	1	0	0	0	0	0	1	0	1	12	12
O15169-2;O15169;H0Y830	O15169-2;O15169	14;14;1	14;14;1	14;14;1	Axin-1	AXIN1	>sp|O15169-2|AXIN1_HUMAN Isoform 2 of Axin-1 OS=Homo sapiens GN=AXIN1;>sp|O15169|AXIN1_HUMAN Axin-1 OS=Homo sapiens GN=AXIN1 PE=1 SV=2	3	14	14	14	5	3	8	7	12	9	12	12	7	2	3	3	5	3	8	7	12	9	12	12	7	2	3	3	5	3	8	7	12	9	12	12	7	2	3	3	22.5	22.5
O15173	O15173	2	2	2	Membrane-associated progesterone receptor component 2	PGRMC2	>sp|O15173|PGRC2_HUMAN Membrane-associated progesterone receptor component 2 OS=Homo sapiens GN=PGRMC2 PE=1 SV=1	1	2	2	2	1	1	1	1	1	2	1	2	1	0	1	1	1	1	1	1	1	2	1	2	1	0	1	1	1	1	1	1	1	2	1	2	1	0	1	1	14.8	14.8
O15235	O15235	5	5	5	28S ribosomal protein S12, mitochondrial	MRPS12	>sp|O15235|RT12_HUMAN 28S ribosomal protein S12, mitochondrial OS=Homo sapiens GN=MRPS12 PE=1 SV=1	1	5	5	5	5	5	5	5	4	4	5	5	5	5	5	5	5	5	5	5	4	4	5	5	5	5	5	5	5	5	5	5	4	4	5	5	5	5	5	5	39.1	39.1
Q9P0H9;O15258;Q5T092;Q5T091;Q5T093	Q9P0H9;O15258;Q5T092;Q5T091	5;5;4;4;2	5;5;4;4;2	5;5;4;4;2	Protein RER1	RER1	>tr|Q9P0H9|Q9P0H9_HUMAN Protein RER1 OS=Homo sapiens GN=RER1 PE=2 SV=1;>sp|O15258|RER1_HUMAN Protein RER1 OS=Homo sapiens GN=RER1 PE=1 SV=1;>tr|Q5T092|Q5T092_HUMAN Protein RER1 (Fragment) OS=Homo sapiens GN=RER1 PE=2 SV=1;>tr|Q5T091|Q5T091_HUMAN Protein RE	5	5	5	5	5	4	4	4	4	4	5	4	4	5	4	4	5	4	4	4	4	4	5	4	4	5	4	4	5	4	4	4	4	4	5	4	4	5	4	4	30.8	30.8
Q5T8U5;Q5T8U7;O15260-2;O15260;B7Z7A8;B7Z6A4	Q5T8U5;Q5T8U7;O15260-2;O15260;B7Z7A8;B7Z6A4	6;6;6;6;5;4	6;6;6;6;5;4	6;6;6;6;5;4	Surfeit locus protein 4	SURF4	>tr|Q5T8U5|Q5T8U5_HUMAN Surfeit 4 OS=Homo sapiens GN=SURF4 PE=2 SV=1;>tr|Q5T8U7|Q5T8U7_HUMAN Surfeit 4 OS=Homo sapiens GN=SURF4 PE=2 SV=1;>sp|O15260-2|SURF4_HUMAN Isoform 2 of Surfeit locus protein 4 OS=Homo sapiens GN=SURF4;>sp|O15260|SURF4_HUMAN Surfeit	6	6	6	6	6	6	6	6	6	5	6	6	6	6	6	6	6	6	6	6	6	5	6	6	6	6	6	6	6	6	6	6	6	5	6	6	6	6	6	6	39.8	39.8
O15269;O15269-2	O15269;O15269-2	4;2	4;2	4;2	Serine palmitoyltransferase 1	SPTLC1	>sp|O15269|SPTC1_HUMAN Serine palmitoyltransferase 1 OS=Homo sapiens GN=SPTLC1 PE=1 SV=1;>sp|O15269-2|SPTC1_HUMAN Isoform 2 of Serine palmitoyltransferase 1 OS=Homo sapiens GN=SPTLC1	2	4	4	4	2	2	2	3	1	3	2	1	2	2	3	3	2	2	2	3	1	3	2	1	2	2	3	3	2	2	2	3	1	3	2	1	2	2	3	3	11.4	11.4
O15294;O15294-2;O15294-4;C9JZL3;H7C2T7	O15294;O15294-2;O15294-4	30;25;18;4;3	30;25;18;4;3	2;0;0;1;0	UDP-N-acetylglucosamine--peptide N-acetylglucosaminyltransferase 110 kDa subunit	OGT	>sp|O15294|OGT1_HUMAN UDP-N-acetylglucosamine--peptide N-acetylglucosaminyltransferase 110 kDa subunit OS=Homo sapiens GN=OGT PE=1 SV=3;>sp|O15294-2|OGT1_HUMAN Isoform 2 of UDP-N-acetylglucosamine--peptide N-acetylglucosaminyltransferase 110 kDa subunit OS	5	30	30	2	26	22	27	21	22	24	27	26	25	24	25	26	26	22	27	21	22	24	27	26	25	24	25	26	2	2	2	2	2	2	2	2	2	2	2	2	37.3	37.3
O15294-3	O15294-3	29	1	1	UDP-N-acetylglucosamine--peptide N-acetylglucosaminyltransferase 110 kDa subunit	OGT	>sp|O15294-3|OGT1_HUMAN Isoform 1 of UDP-N-acetylglucosamine--peptide N-acetylglucosaminyltransferase 110 kDa subunit OS=Homo sapiens GN=OGT	1	29	1	1	25	21	25	19	21	22	25	24	23	22	23	24	1	1	0	0	1	0	0	0	0	0	0	0	1	1	0	0	1	0	0	0	0	0	0	0	36.7	1.8
O15379;O15379-2;E7ESJ6;E7EWI8;E7EW19	O15379;O15379-2	12;11;5;3;1	11;10;4;3;1	11;10;4;3;1	Histone deacetylase 3	HDAC3	>sp|O15379|HDAC3_HUMAN Histone deacetylase 3 OS=Homo sapiens GN=HDAC3 PE=1 SV=2;>sp|O15379-2|HDAC3_HUMAN Isoform 2 of Histone deacetylase 3 OS=Homo sapiens GN=HDAC3	5	12	11	11	9	9	7	8	10	10	11	12	7	8	10	9	8	8	6	7	9	9	10	11	6	7	9	8	8	8	6	7	9	9	10	11	6	7	9	8	42.5	40.7
O15391	O15391	5	2	2	Transcription factor YY2	YY2	>sp|O15391|TYY2_HUMAN Transcription factor YY2 OS=Homo sapiens GN=YY2 PE=2 SV=1	1	5	2	2	4	2	4	2	3	4	4	4	5	4	0	2	2	1	2	0	2	2	2	2	2	2	0	1	2	1	2	0	2	2	2	2	2	2	0	1	12.1	4.3
O15431;Q5T1M3	O15431	3;1	3;1	3;1	High affinity copper uptake protein 1	SLC31A1	>sp|O15431|COPT1_HUMAN High affinity copper uptake protein 1 OS=Homo sapiens GN=SLC31A1 PE=1 SV=1	2	3	3	3	2	2	3	2	2	2	2	2	2	2	2	2	2	2	3	2	2	2	2	2	2	2	2	2	2	2	3	2	2	2	2	2	2	2	2	2	16.3	16.3
O15446;O15446-2	O15446;O15446-2	1;1	1;1	1;1	DNA-directed RNA polymerase I subunit RPA34	CD3EAP	>sp|O15446|RPA34_HUMAN DNA-directed RNA polymerase I subunit RPA34 OS=Homo sapiens GN=CD3EAP PE=1 SV=1;>sp|O15446-2|RPA34_HUMAN Isoform 2 of DNA-directed RNA polymerase I subunit RPA34 OS=Homo sapiens GN=CD3EAP	2	1	1	1	0	0	0	0	0	0	0	0	0	0	0	1	0	0	0	0	0	0	0	0	0	0	0	1	0	0	0	0	0	0	0	0	0	0	0	1	4.7	4.7
O15460-2;O15460;H7BZL9;C9JN43;C9JIG4;C9JCP0;C9JX45;A8MXE0;E7ERI1;E7ENX0;E7EPI9	O15460-2;O15460	9;9;1;1;1;1;1;1;1;1;1	9;9;1;1;1;1;1;1;1;1;1	9;9;1;1;1;1;1;1;1;1;1	Prolyl 4-hydroxylase subunit alpha-2	P4HA2	>sp|O15460-2|P4HA2_HUMAN Isoform IIa of Prolyl 4-hydroxylase subunit alpha-2 OS=Homo sapiens GN=P4HA2;>sp|O15460|P4HA2_HUMAN Prolyl 4-hydroxylase subunit alpha-2 OS=Homo sapiens GN=P4HA2 PE=1 SV=1	11	9	9	9	2	5	2	2	5	3	5	6	1	3	3	1	2	5	2	2	5	3	5	6	1	3	3	1	2	5	2	2	5	3	5	6	1	3	3	1	23.3	23.3
O15479	O15479	3	3	3	Melanoma-associated antigen B2	MAGEB2	>sp|O15479|MAGB2_HUMAN Melanoma-associated antigen B2 OS=Homo sapiens GN=MAGEB2 PE=1 SV=3	1	3	3	3	2	1	2	3	2	2	2	2	2	0	2	2	2	1	2	3	2	2	2	2	2	0	2	2	2	1	2	3	2	2	2	2	2	0	2	2	11	11
O15554	O15554	6	6	6	Intermediate conductance calcium-activated potassium channel protein 4	KCNN4	>sp|O15554|KCNN4_HUMAN Intermediate conductance calcium-activated potassium channel protein 4 OS=Homo sapiens GN=KCNN4 PE=1 SV=1	1	6	6	6	1	3	0	1	1	1	2	1	0	3	1	1	1	3	0	1	1	1	2	1	0	3	1	1	1	3	0	1	1	1	2	1	0	3	1	1	17.3	17.3
O43148;O43148-2;F5H2D9;B7Z8S9	O43148;O43148-2;F5H2D9	6;6;4;1	6;6;4;1	6;6;4;1	mRNA cap guanine-N7 methyltransferase	RNMT	>sp|O43148|MCES_HUMAN mRNA cap guanine-N7 methyltransferase OS=Homo sapiens GN=RNMT PE=1 SV=1;>sp|O43148-2|MCES_HUMAN Isoform 2 of mRNA cap guanine-N7 methyltransferase OS=Homo sapiens GN=RNMT;>tr|F5H2D9|F5H2D9_HUMAN mRNA cap guanine-N7 methyltransferase O	4	6	6	6	2	3	3	4	2	4	4	3	3	4	3	5	2	3	3	4	2	4	4	3	3	4	3	5	2	3	3	4	2	4	4	3	3	4	3	5	16.4	16.4
O43172-2;O43172	O43172-2;O43172	6;6	6;6	6;6	U4/U6 small nuclear ribonucleoprotein Prp4	PRPF4	>sp|O43172-2|PRP4_HUMAN Isoform 2 of U4/U6 small nuclear ribonucleoprotein Prp4 OS=Homo sapiens GN=PRPF4;>sp|O43172|PRP4_HUMAN U4/U6 small nuclear ribonucleoprotein Prp4 OS=Homo sapiens GN=PRPF4 PE=1 SV=2	2	6	6	6	3	2	2	1	3	3	3	4	3	2	2	2	3	2	2	1	3	3	3	4	3	2	2	2	3	2	2	1	3	3	3	4	3	2	2	2	16.5	16.5
Q5SZU1;O43175;F5H634	Q5SZU1;O43175;F5H634	2;2;1	2;2;1	2;2;1	D-3-phosphoglycerate dehydrogenase	PHGDH	>tr|Q5SZU1|Q5SZU1_HUMAN D-3-phosphoglycerate dehydrogenase OS=Homo sapiens GN=PHGDH PE=2 SV=1;>sp|O43175|SERA_HUMAN D-3-phosphoglycerate dehydrogenase OS=Homo sapiens GN=PHGDH PE=1 SV=4;>tr|F5H634|F5H634_HUMAN D-3-phosphoglycerate dehydrogenase OS=Homo sap	3	2	2	2	0	0	0	0	0	0	1	2	1	1	0	0	0	0	0	0	0	0	1	2	1	1	0	0	0	0	0	0	0	0	1	2	1	1	0	0	4.6	4.6
O43290;G3V1T2;E9PQI8	O43290;G3V1T2	42;34;6	42;34;6	42;34;6	U4/U6.U5 tri-snRNP-associated protein 1	SART1	>sp|O43290|SNUT1_HUMAN U4/U6.U5 tri-snRNP-associated protein 1 OS=Homo sapiens GN=SART1 PE=1 SV=1;>tr|G3V1T2|G3V1T2_HUMAN Squamous cell carcinoma antigen recognised by T cells, isoform CRA_b OS=Homo sapiens GN=SART1 PE=4 SV=1	3	42	42	42	30	31	31	28	28	31	30	30	26	30	28	29	30	31	31	28	28	31	30	30	26	30	28	29	30	31	31	28	28	31	30	30	26	30	28	29	50.8	50.8
O43292;O43292-2;E9PLG8;E9PLV6;E9PPZ9;E9PQ31;E9PM11	O43292;O43292-2;E9PLG8;E9PLV6;E9PPZ9	5;4;3;3;3;2;1	5;4;3;3;3;2;1	5;4;3;3;3;2;1	Glycosylphosphatidylinositol anchor attachment 1 protein	GPAA1	>sp|O43292|GPAA1_HUMAN Glycosylphosphatidylinositol anchor attachment 1 protein OS=Homo sapiens GN=GPAA1 PE=1 SV=3;>sp|O43292-2|GPAA1_HUMAN Isoform 2 of Glycosylphosphatidylinositol anchor attachment 1 protein OS=Homo sapiens GN=GPAA1;>tr|E9PLG8|E9PLG8_HUM	7	5	5	5	3	1	3	1	3	2	2	3	2	2	2	2	3	1	3	1	3	2	2	3	2	2	2	2	3	1	3	1	3	2	2	3	2	2	2	2	8.4	8.4
O43293;O43293-2;E9PBT2;Q9UIK4;Q9UIK4-2;E9JGM7	O43293	20;7;3;1;1;1	20;7;3;1;1;1	20;7;3;1;1;1	Death-associated protein kinase 3	DAPK3	>sp|O43293|DAPK3_HUMAN Death-associated protein kinase 3 OS=Homo sapiens GN=DAPK3 PE=1 SV=1	6	20	20	20	16	15	17	13	12	16	12	15	10	15	17	18	16	15	17	13	12	16	12	15	10	15	17	18	16	15	17	13	12	16	12	15	10	15	17	18	42.1	42.1
O43310	O43310	32	2	2	CBP80/20-dependent translation initiation factor	CTIF	>sp|O43310|CTIF_HUMAN CBP80/20-dependent translation initiation factor OS=Homo sapiens GN=CTIF PE=1 SV=1	1	32	2	2	22	23	27	28	28	23	27	26	19	16	14	18	1	2	2	2	2	1	2	2	2	1	1	1	1	2	2	2	2	1	2	2	2	1	1	1	63.4	3
O43310-2	O43310-2	32	32	2	CBP80/20-dependent translation initiation factor	CTIF	>sp|O43310-2|CTIF_HUMAN Isoform 2 of CBP80/20-dependent translation initiation factor OS=Homo sapiens GN=CTIF	1	32	32	2	23	23	27	28	28	23	27	26	19	15	14	18	23	23	27	28	28	23	27	26	19	15	14	18	2	2	2	2	2	1	2	2	2	0	1	1	63.2	63.2
O43318-2;O43318;O43318-4;O43318-3;E7EMD4;Q9UG54	O43318-2;O43318;O43318-4;O43318-3;E7EMD4;Q9UG54	12;12;9;9;8;7	12;12;9;9;8;7	12;12;9;9;8;7	Mitogen-activated protein kinase kinase kinase 7	MAP3K7;DKFZp586F0420	>sp|O43318-2|M3K7_HUMAN Isoform 1A of Mitogen-activated protein kinase kinase kinase 7 OS=Homo sapiens GN=MAP3K7;>sp|O43318|M3K7_HUMAN Mitogen-activated protein kinase kinase kinase 7 OS=Homo sapiens GN=MAP3K7 PE=1 SV=1;>sp|O43318-4|M3K7_HUMAN Isoform 1D o	6	12	12	12	3	5	8	5	11	7	8	6	5	2	2	3	3	5	8	5	11	7	8	6	5	2	2	3	3	5	8	5	11	7	8	6	5	2	2	3	27.8	27.8
O43353;O43353-2	O43353;O43353-2	5;4	5;4	5;4	Receptor-interacting serine/threonine-protein kinase 2	RIPK2	>sp|O43353|RIPK2_HUMAN Receptor-interacting serine/threonine-protein kinase 2 OS=Homo sapiens GN=RIPK2 PE=1 SV=2;>sp|O43353-2|RIPK2_HUMAN Isoform 2 of Receptor-interacting serine/threonine-protein kinase 2 OS=Homo sapiens GN=RIPK2	2	5	5	5	1	2	1	2	4	2	4	3	3	1	2	2	1	2	1	2	4	2	4	3	3	1	2	2	1	2	1	2	4	2	4	3	3	1	2	2	12.6	12.6
[truncated: 1,287 more rows]
[truncated: 80 more columns]

## Sheet: Accepted
Protein IDs	Majority protein IDs	Peptide counts (all)	Peptide counts (razor+unique)	Peptide counts (unique)	Protein names	Gene names	Fasta headers		Number of proteins	Peptides	Razor + unique peptides	Unique peptides	Peptides Mut_1	Peptides Mut_2	Peptides Mut_3	Peptides Mut_4	Peptides Vector_1	Peptides Vector_2	Peptides Vector_3	Peptides Vector_4	Peptides WT_1	Peptides WT_2	Peptides WT_3	Peptides WT_4	Razor + unique peptides Mut_1	Razor + unique peptides Mut_2	Razor + unique peptides Mut_3	Razor + unique peptides Mut_4	Razor + unique peptides Vector_1	Razor + unique peptides Vector_2	Razor + unique peptides Vector_3	Razor + unique peptides Vector_4	Razor + unique peptides WT_1	Razor + unique peptides WT_2	Razor + unique peptides WT_3	Razor + unique peptides WT_4	Unique peptides Mut_1	Unique peptides Mut_2	Unique peptides Mut_3	Unique peptides Mut_4	Unique peptides Vector_1	Unique peptides Vector_2	Unique peptides Vector_3	Unique peptides Vector_4	Unique peptides WT_1	Unique peptides WT_2	Unique peptides WT_3	Unique peptides WT_4	Sequence coverage [%]
[truncated: 1,586 more rows]
[truncated: 183 more columns]

[truncated: 3 more sheets: Rejeceted, Normalization, Shortlist 103_summary]
